# Supplementary material for: DNA characterization reveals potential operon-unit packaging of extracellular vesicle cargo from a gut bacterial symbiont
Source: Research Square preprint supplement (doi:10.21203/rs.3.rs-3689023/v1), 2023-12-04
Supplement: Supplementary file 1 [file 2ac5825141d40a5da41e8771.xlsx]

## Sheet: Metadata
id	simulation	group
p1	exp	p1
p1_sim1	sim	p1
p1_sim2	sim	p1
p1_sim3	sim	p1
wt	exp	wt
wt_sim1	sim	wt
wt_sim2	sim	wt
wt_sim3	sim	wt
p2	exp	p2
p2_sim1	sim	p2
p2_sim2	sim	p2
p2_sim3	sim	p2

## Sheet: Heteroskedacity_test_pval
method	p_value
Levene	0.216187
Levene	0.351502
Levene	0.449815
Levene	0.0282991
Levene	0.20142
Levene	0.225804
Levene	0.340043
Levene	0.00945463
Levene	0.399743
Levene	0.290223
Levene	0.037229
Levene	0.304592
Levene	0.976592
Levene	0.746199
Levene	0.0440755
Levene	0.877483
Levene	0.0289531
Levene	0.652437
Levene	0.300304
Levene	0.474053
Levene	0.573379
Levene	0.713336
Levene	0.406999
Levene	0.602703
Levene	0.0811967
Levene	0.447216
Levene	0.0017693
Levene	0.564544
Levene	0.76998
Levene	0.019186
Levene	0.910224
Levene	0.000887199
Levene	0.82746
Levene	0.700223
Levene	0.437223
Levene	0.548369
Levene	0.744634
Levene	0.457198
Levene	0.188216
Levene	0.130359
Levene	0.484477
Levene	0.437165
Levene	0.097105
Levene	0.00119385
Levene	0.553611
Levene	0.509042
Levene	0.0217294
Levene	0.194273
Levene	0.31685
Levene	0.873183
Levene	0.608692
Levene	0.0499497
Levene	0.838013
Levene	0.516482
Levene	0.452382
Levene	0.0215685
Levene	0.421816
Levene	0.0280435
Levene	0.324624
Levene	0.720931
Levene	0.196662
Levene	0.00554243
Levene	0.693527
Levene	0.943045
Levene	0.00815861
Levene	0.0584515
Levene	0.133487
Levene	0.371875
Levene	0.103888
Levene	0.000507026
Levene	0.852805
Levene	0.0727128
Levene	0.521115
Levene	0.565957
Levene	0.895414
Levene	0.151699
Levene	0.0106203
Levene	0.758917
Levene	0.419525
Levene	0.941942
Levene	0.299691
Levene	0.493102
Levene	0.101225
Levene	0.609837
Levene	0.209898
Levene	0.179567
Levene	0.516673
Levene	0.75057
Levene	0.265783
Levene	0.381859
Levene	0.0858193
Levene	0.58161
Levene	0.585463
Levene	0.93688
Levene	0.0528007
Levene	0.387661
Levene	0.5442
Levene	0.00888061
Levene	0.878619
Levene	0.53225
Levene	0.275267
Levene	0.0567653
Levene	0.623533
Levene	0.878381
Levene	0.613285
Levene	0.170378
Levene	0.576449
Levene	0.442204
Levene	0.253995
Levene	0.729265
Levene	0.469165
Levene	0.712728
Levene	0.149576
Levene	0.56529
Levene	0.435619
Levene	0.339305
Levene	0.456928
Levene	0.311008
Levene	0.0055101
Levene	0.193797
Levene	0.0628202
Levene	0.00646726
Levene	0.397091
Levene	0.57491
Levene	0.457949
Levene	0.29771
Levene	0.110202
Levene	0.892838
Levene	0.932275
Levene	0.580165
Levene	0.764399
Levene	0.844292
Levene	0.00137505
Levene	0.830931
Levene	0.176058
Levene	0.559501
Levene	0.327669
Levene	0.475776
Levene	0.695121
Levene	0.38437
Levene	0.123356
Levene	0.136069
Levene	0.716487
Levene	0.385201
Levene	0.264516
Levene	0.969132
Levene	0.35447
Levene	0.118026
Levene	0.937091
Levene	0.854606
Levene	0.65846
Levene	0.166016
Levene	0.69338
Levene	0.0466064
Levene	0.642002
Levene	0.224703
Levene	0.371021
Levene	0.0169146
Levene	0.379921
Levene	0.147099
Levene	0.165279
Levene	0.734732
Levene	0.914474
Levene	0.382414
Levene	0.31117
Levene	0.432754
Levene	0.812719
Levene	0.66381
Levene	0.0598794
Levene	0.0906867
Levene	0.55341
Levene	0.0433127
Levene	0.911632
Levene	0.170325
Levene	0.351542
Levene	0.338754
Levene	0.627041
Levene	0.365946
Levene	0.0869926
Levene	0.622399
Levene	0.0937002
Levene	0.622016
Levene	0.62491
Levene	0.242365
Levene	0.64175
Levene	0.334394
Levene	0.00354103
Levene	0.142851
Levene	0.327975
Levene	0.381068
Levene	0.29144
Levene	0.00623952
Levene	0.490105
Levene	0.0486286
Levene	0.22326
Levene	0.838809
Levene	0.244335
Levene	0.399934
Levene	0.000901845
Levene	0.562396
Levene	0.0382066
Levene	0.78678
Levene	0.61188
Levene	0.0282474
Levene	0.574375
Levene	0.0346827
Levene	0.94917
Levene	0.637775
Levene	0.113543
Levene	0.688835
Levene	0.667769
Levene	0.842243
Levene	0.0844751
Levene	0.548242
Levene	0.35567
Levene	0.0652415
Levene	0.0373882
Levene	0.434791
Levene	0.687214
Levene	0.104339
Levene	0.399692
Levene	0.463058
Levene	0.136413
Levene	0.249136
Levene	0.265319
Levene	0.16562
Levene	0.0521708
Levene	0.365834
Levene	0.487363
Levene	0.293196
Levene	0.215643
Levene	0.00305197
Levene	0.190756
Levene	0.250679
Levene	0.510279
Levene	0.0046713
Levene	0.0181868
Levene	0.431051
Levene	0.789233
Levene	0.806709
Levene	0.830727
Levene	0.576209
Levene	0.086734
Levene	0.436006
Levene	0.882075
Levene	0.649324
Levene	0.776874
Levene	0.223256
Levene	0.668416
Levene	0.405296
Levene	0.356676
Levene	0.238487
Levene	0.226205
Levene	0.644699
Levene	0.359548
Levene	0.571716
Levene	0.697747
Levene	0.150139
Levene	0.624739
Levene	0.163282
Levene	0.688963
Levene	0.3948
Levene	0.0132691
Levene	0.418065
Levene	0.864764
Levene	0.0134454
Levene	0.351279
Levene	0.940477
Levene	0.47346
Levene	0.603193
Levene	0.633678
Levene	0.20284
Levene	0.277104
Levene	0.735574
Levene	0.322108
Levene	0.810877
Levene	0.667151
Levene	0.0402697
Levene	0.670042
Levene	0.300665
Levene	0.674455
Levene	0.962151
Levene	0.598894
Levene	0.158428
Levene	0.36911
Levene	0.721004
Levene	4.76456e-06
Levene	0.0841476
Levene	0.0179681
Levene	0.743301
Levene	0.752415
Levene	0.18608
Levene	0.444481
Levene	0.0029808
Levene	0.00948961
Levene	0.608613
Levene	0.654194
Levene	0.546846
Levene	0.476115
Levene	0.569844
Levene	0.403149
Levene	0.838356
Levene	0.997221
Levene	0.712572
Levene	0.69597
Levene	0.00888738
Levene	0.574976
Levene	0.597084
Levene	0.00290311
Levene	0.416674
Levene	0.512634
Levene	0.0690077
Levene	0.608436
Levene	0.466655
Levene	0.0327813
Levene	0.628515
Levene	0.0718463
Levene	0.621275
Levene	0.442241
Levene	0.825933
Levene	0.0108081
Levene	0.862511
Levene	0.00462064
Levene	0.794348
Levene	0.0119107
Levene	0.0934935
Levene	0.887264
Levene	0.000458733
Levene	0.648247
Levene	0.344383
Levene	0.00571156
Levene	0.252872
Levene	0.505272
Levene	0.0692071
Levene	0.650811
Levene	0.994006
Levene	0.19837
Levene	0.892941
Levene	0.467707
Levene	0.688501
Levene	0.664935
Levene	0.258977
Levene	0.408082
Levene	0.465645
Levene	0.266686
Levene	0.689599
Levene	0.435908
Levene	0.0205016
Levene	0.210597
Levene	0.276656
Levene	0.00735372
Levene	0.691219
Levene	0.389189
Levene	0.687793
Levene	0.0645175
Levene	0.383081
Levene	0.639752
Levene	0.274557
Levene	0.652454
Levene	0.0696084
Levene	0.627484
Levene	0.0100002
Levene	0.620582
Levene	0.828523
Levene	0.344674
Levene	0.0798727
Levene	0.467331
Levene	0.749589
Levene	0.358452
Levene	0.389119
Levene	0.40544
Levene	0.0886948
Levene	0.354274
Levene	0.808991
Levene	0.85387
Levene	0.218771
Levene	0.92807
Levene	0.841814
Levene	0.395215
Levene	0.654386
Levene	0.539541
Levene	0.338346
Levene	0.642171
Levene	0.274819
Levene	0.867474
Levene	0.960073
Levene	0.0103195
Levene	0.00781035
Levene	0.412298
Levene	0.549809
Levene	0.891405
Levene	0.553525
Levene	0.145937
Levene	0.483317
Levene	0.790099
Levene	0.186188
Levene	0.6277
Levene	0.48129
Levene	0.772105
Levene	0.512017
Levene	0.991956
Levene	0.0728466
Levene	0.381876
Levene	0.784928
Levene	0.277764
Levene	0.191293
Levene	0.596907
Levene	0.290072
Levene	0.0723511
Levene	0.0533149
Levene	0.402879
Levene	0.64402
Levene	0.00026
Levene	0.0057685
Levene	0.775945
Levene	0.791924
Levene	0.0141678
Levene	0.0215772
Levene	0.000317208
Levene	0.279605
Levene	0.461496
Levene	0.244768
Levene	0.875146
Levene	0.0483405
Levene	0.278169
Levene	0.4372
Levene	0.692792
Levene	0.0827727
Levene	0.69821
Levene	0.885664
Levene	0.0199064
Levene	0.104396
Levene	0.310056
Levene	0.959404
Levene	0.364043
Levene	0.779774
Levene	0.0999918
Levene	0.40501
Levene	0.452743
Levene	0.89206
Levene	0.934898
Levene	0.268846
Levene	0.85109
Levene	0.7083
Levene	0.000104428
Levene	0.694914
Levene	0.534126
Levene	0.488711
Levene	0.616582
Levene	0.474564
Levene	0.792203
Levene	0.738952
Levene	0.397213
Levene	0.616157
Levene	0.130621
Levene	0.775052
Levene	0.404868
Levene	0.200681
Levene	0.865766
Levene	0.341962
Levene	0.689635
Levene	0.990297
Levene	0.399098
Levene	0.364555
Levene	0.0309887
Levene	0.139814
Levene	0.953375
Levene	0.111849
Levene	0.991958
Levene	0.0317428
Levene	0.590964
Levene	0.0492583
Levene	0.49949
Levene	0.325477
Levene	0.380398
Levene	0.717022
Levene	0.654603
Levene	0.275545
Levene	0.587846
Levene	0.48882
Levene	0.673146
Levene	0.000789088
Levene	0.0767331
Levene	0.479933
Levene	0.150758
Levene	0.114129
Levene	0.295784
Levene	0.0020016
Levene	0.00263358
Levene	0.791069
Levene	0.947337
Levene	0.00477518
Levene	0.0591983
Levene	0.849386
Levene	0.460306
Levene	0.0429484
Levene	0.468339
Levene	0.594303
Levene	0.684902
Levene	0.451339
Levene	0.0465129
Levene	0.543463
Levene	0.404696
Levene	0.0781182
Levene	0.0906551
Levene	0.309742
Levene	0.512439
Levene	0.564754
Levene	0.305698
Levene	0.192343
Levene	0.743253
Levene	0.533499
Levene	0.100319
Levene	0.0377662
Levene	0.0858653
Levene	0.361814
Levene	0.460988
Levene	0.601956
Levene	0.0400245
Levene	0.527288
Levene	0.100566
Levene	0.363888
Levene	0.753799
Levene	0.290263
Levene	0.00420009
Levene	0.168542
Levene	0.919822
Levene	0.224609
Levene	0.151909
Levene	0.131142
Levene	0.00606835
Levene	0.518
Levene	0.0251741
Levene	0.804622
Levene	0.355224
Levene	0.561615
Levene	0.214798
Levene	0.844656
Levene	0.0245628
Levene	0.0345643
Levene	0.170578
Levene	0.0457489
Levene	0.929003
Levene	0.110533
Levene	0.693856
Levene	0.139718
Levene	0.540729
Levene	0.0501752
Levene	0.0340788
Levene	0.46458
Levene	0.260672
Levene	0.310462
Levene	0.0176562
Levene	0.111331
Levene	0.120155
Levene	0.430798
Levene	0.678266
Levene	0.124607
Levene	0.0172035
Levene	0.816927
Levene	0.768998
Levene	0.234893
Levene	0.960249
Levene	0.000373518
Levene	0.402184
Levene	0.334083
Levene	0.44538
Levene	0.454238
Levene	0.0250842
Levene	0.763953
Levene	0.0772085
Levene	0.0244916
Levene	0.245487
Levene	0.896641
Levene	0.818681
Levene	0.591876
Levene	0.349665
Levene	0.310294
Levene	0.247439
Levene	0.0983434
Levene	0.0997895
Levene	0.082245
Levene	0.80827
Levene	0.20448
Levene	0.666518
Levene	0.0325185
Levene	0.472236
Levene	2.87163e-05
Levene	0.799433
Levene	0.279844
Levene	0.00736982
Levene	0.242329
Levene	0.239625
Levene	0.243487
Levene	0.0952871
Levene	0.628584
Levene	0.160372
Levene	0.122863
Levene	0.367139
Levene	0.716523
Levene	0.00215408
Levene	0.603873
Levene	0.538981
Levene	0.48625
Levene	0.00750469
Levene	0.222718
Levene	0.237291
Levene	0.154037
Levene	0.122789
Levene	0.00431982
Levene	0.36435
Levene	0.714353
Levene	0.115412
Levene	0.364584
Levene	0.253816
Levene	0.00246827
Levene	0.0216945
Levene	0.958738
Levene	0.00055976
Levene	0.0788149
Levene	0.54519
Levene	0.812164
Levene	0.0164979
Levene	0.679584
Levene	0.380589
Levene	0.608596
Levene	0.116438
Levene	0.232549
Levene	0.00310737
Levene	0.00337406
Levene	0.99254
Levene	0.770563
Levene	0.538709
Levene	0.827552
Levene	0.615183
Levene	0.143336
Levene	0.000154185
Levene	0.139224
Levene	0.833773
Levene	0.000259602
Levene	0.402086
Levene	0.277178
Levene	0.893548
Levene	0.631969
Levene	0.822087
Levene	0.015508
Levene	0.0347788
Levene	0.215771
Levene	0.0370192
Levene	0.720038
Levene	0.685496
Levene	0.298314
Levene	0.00728021
Levene	0.163697
Levene	0.941257
Levene	0.852373
Levene	0.16827
Levene	0.0737047
Levene	0.671802
Levene	0.344823
Levene	0.458918
Levene	0.155713
Levene	0.569016
Levene	0.00475654
Levene	0.0033749
Levene	0.389925
Levene	0.805258
Levene	0.436727
Levene	0.0555233
Levene	0.376827
Levene	0.656431
Levene	0.185842
Levene	0.540418
Levene	0.0103772
Levene	0.289228
Levene	0.129555
Levene	0.410501
Levene	0.587314
Levene	0.47294
Levene	0.859002
Levene	0.542146
Levene	0.14151
Levene	0.699966
Levene	0.250731
Levene	0.382594
Levene	0.471368
Levene	0.585963
Levene	0.0156867
Levene	0.461439
Levene	0.629472
Levene	0.00034425
Levene	0.669019
Levene	0.231224
Levene	0.230782
Levene	0.227746
Levene	0.321922
Levene	0.181314
Levene	0.611459
Levene	0.11444
Levene	0.302049
Levene	0.703667
Levene	0.46462
Levene	0.0467538
Levene	0.623847
Levene	0.0485742
Levene	0.620599
Levene	0.853382
Levene	0.540765
Levene	0.295083
Levene	0.483181
Levene	0.710906
Levene	0.14018
Levene	0.00168147
Levene	0.408987
Levene	0.122471
Levene	0.0380932
Levene	0.72664
Levene	0.460988
Levene	0.00276162
Levene	0.14048
Levene	0.121564
Levene	0.295968
Levene	0.133462
Levene	0.118987
Levene	0.831743
Levene	0.329287
Levene	0.498804
Levene	0.696642
Levene	0.27944
Levene	0.80214
Levene	0.30182
Levene	0.706218
Levene	0.68034
Levene	0.0280526
Levene	0.00945854
Levene	0.442817
Levene	0.0790915
Levene	0.0948435
Levene	0.666235
Levene	0.356792
Levene	0.000457102
Levene	0.601472
Levene	1.39678e-05
Levene	0.474113
Levene	0.973998
Levene	0.151087
Levene	0.288527
Levene	0.71581
Levene	0.238118
Levene	0.295808
Levene	0.0168495
Levene	0.0861704
Levene	0.0835198
Levene	2.16338e-05
Levene	0.0772282
Levene	0.382907
Levene	0.357516
Levene	0.336074
Levene	0.956935
Levene	0.938095
Levene	0.940653
Levene	0.0131139
Levene	0.0889663
Levene	0.558641
Levene	0.292259
Levene	0.484468
Levene	0.104562
Levene	0.546091
Levene	0.000903736
Levene	0.197176
Levene	0.929724
Levene	0.00224807
Levene	0.909097
Levene	0.543466
Levene	0.134093
Levene	0.402654
Levene	0.0658269
Levene	0.155299
Levene	0.346251
Levene	0.0652666
Levene	0.41009
Levene	0.00224428
Levene	0.275338
Levene	0.49432
Levene	0.236068
Levene	0.140617
Levene	0.434444
Levene	0.955843
Levene	0.0318399
Levene	0.358495
Levene	0.364217
Levene	0.00163821
Levene	0.182539
Levene	0.332303
Levene	0.0836527
Levene	0.57269
Levene	0.353806
Levene	0.955231
Levene	0.556283
Levene	0.275234
Levene	0.0134003
Levene	0.00139766
Levene	0.88939
Levene	0.730335
Levene	0.0641553
Levene	0.00621853
Levene	0.328348
Levene	0.96616
Levene	0.429621
Levene	0.831918
Levene	0.00180854
Levene	0.926614
Levene	0.880825
Levene	0.121712
Levene	0.000727909
Levene	0.370264
Levene	0.988584
Levene	0.639471
Levene	0.461547
Levene	0.513196
Levene	0.659649
Levene	0.190118
Levene	0.643178
Levene	0.512337
Levene	0.051934
Levene	0.405989
Levene	0.24122
Levene	0.525318
Levene	0.648855
Levene	0.592338
Levene	0.449011
Levene	0.780481
Levene	0.115219
Levene	0.122299
Levene	0.116959
Levene	0.769826
Levene	0.25378
Levene	0.316885
Levene	0.917469
Levene	0.212673
Levene	0.191044
Levene	0.306833
Levene	0.995785
Levene	0.309858
Levene	0.430556
Levene	0.133044
Levene	0.815096
Levene	0.000356431
Levene	0.172794
Levene	0.955549
Levene	0.491182
Levene	0.191952
Levene	0.352171
Levene	0.154509
Levene	0.230994
Levene	0.0430694
Levene	0.930464
Levene	0.19185
Levene	0.439219
Levene	0.000675837
Levene	0.332062
Levene	0.14654
Levene	0.89221
Levene	0.717304
Levene	0.717405
Levene	0.724432
Levene	0.00760922
Levene	0.807744
Levene	0.219228
Levene	0.823242
Levene	0.578061
Levene	0.116524
Levene	0.188137
Levene	0.363966
Levene	0.299019
Levene	0.125178
Levene	0.094605
Levene	0.144709
Levene	0.849107
Levene	0.425916
Levene	0.290387
Levene	0.0517285
Levene	0.76067
Levene	0.983921
Levene	0.702889
Levene	0.268893
Levene	0.425901
Levene	0.739626
Levene	0.525236
Levene	0.0712386
Levene	4.7276e-05
Levene	0.0988968
Levene	0.21888
Levene	0.166163
Levene	0.366769
Levene	0.236801
Levene	0.0126614
Levene	0.314521
Levene	0.0526248
Levene	0.0386067
Levene	0.0904649
Levene	0.773121
Levene	0.506933
Levene	0.00777758
Levene	0.0610076
Levene	0.415303
Levene	0.803476
Levene	0.734373
Levene	0.277507
Levene	0.760502
Levene	0.960008
Levene	0.207784
Levene	0.00216647
Levene	0.270322
Levene	0.37176
Levene	0.0732154
Levene	0.978571
Levene	0.197627
Levene	0.542508
Levene	0.194791
Levene	0.700463
Levene	0.742288
Levene	0.182494
Levene	0.0103322
Levene	0.893183
Levene	0.265673
Levene	0.0166186
Levene	0.755275
Levene	0.143512
Levene	0.638616
Levene	0.402856
Levene	0.249852
Levene	0.158575
Levene	0.343817
Levene	0.113237
Levene	0.675586
Levene	0.135401
Levene	0.585726
Levene	0.0646708
Levene	0.354254
Levene	6.94966e-06
Levene	0.0290493
Levene	0.662928
Levene	0.362114
Levene	0.994098
Levene	0.568311
Levene	0.940928
Levene	0.274738
Levene	0.956926
Levene	0.923195
Levene	0.868276
Levene	0.185735
Levene	0.267903
Levene	0.481328
Levene	0.874636
Levene	0.422497
Levene	0.994893
Levene	0.0519596
Levene	0.536914
Levene	0.706264
Levene	0.769482
Levene	0.271249
Levene	0.392969
Levene	0.148317
Levene	0.178824
Levene	0.155447
Levene	0.395216
Levene	0.00743456
Levene	0.676892
Levene	0.0707881
Levene	0.697333
Levene	0.271461
Levene	0.241964
Levene	0.136874
Levene	0.854958
Levene	0.0159876
Levene	0.111558
Levene	0.984196
Levene	0.227378
Levene	0.226193
Levene	0.323326
Levene	0.218693
Levene	0.0342661
Levene	0.119808
Levene	0.590421
Levene	0.161203
Levene	0.00133496
Levene	0.0693702
Levene	0.746
Levene	0.677902
Levene	0.867825
Levene	0.0097619
Levene	0.747104
Levene	0.220867
Levene	0.0953101
Levene	0.959666
Levene	0.182211
Levene	0.93452
Levene	0.977551
Levene	0.000174609
Levene	0.669181
Levene	0.10983
Levene	0.526999
Levene	0.374708
Levene	0.00305119
Levene	0.00198122
Levene	0.103693
Levene	0.910459
Levene	0.870289
Levene	0.829086
Levene	0.544218
Levene	0.109674
Levene	0.278981
Levene	0.00303596
Levene	0.200339
Levene	0.196902
Levene	0.308302
Levene	0.0041501
Levene	0.411308
Levene	0.717424
Levene	0.228824
Levene	0.528537
Levene	0.940114
Levene	0.00868274
Levene	0.613805
Levene	0.352745
Levene	0.0185249
Levene	0.185896
Levene	0.335322
Levene	0.737832
Levene	0.00592972
Levene	0.674064
Levene	0.662146
Levene	0.536291
Levene	0.644027
Levene	0.355531
Levene	0.432834
Levene	0.65687
Levene	0.443141
Levene	0.276451
Levene	0.851113
Levene	0.335332
Levene	0.213682
Levene	0.889954
Levene	0.879986
Levene	0.926454
Levene	0.873637
Levene	0.198441
Levene	0.303399
Levene	0.0441629
Levene	0.243371
Levene	0.646793
Levene	0.564773
Levene	0.50844
Levene	0.00980648
Levene	0.153229
Levene	0.733713
Levene	0.709217
Levene	0.00413415
Levene	0.964835
Levene	0.0360508
Levene	0.481807
Levene	0.273611
Levene	0.485555
Levene	0.43792
Levene	0.181032
Levene	0.835379
Levene	0.660127
Levene	0.391042
Levene	0.362567
Levene	0.36792
Levene	0.424069
Levene	0.000299685
Levene	0.2213
Levene	0.515942
Levene	0.200091
Levene	0.617222
Levene	0.0853652
Levene	0.966713
Levene	0.124342
Levene	0.64399
Levene	0.526166
Levene	0.284262
Levene	0.198886
Levene	0.00280294
Levene	0.0326285
Levene	0.0221349
Levene	0.570482
Levene	0.975764
Levene	0.000545821
Levene	0.392556
Levene	1.60691e-05
Levene	0.356049
Levene	0.747876
Levene	0.241505
Levene	0.546364
Levene	0.64377
Levene	0.113738
Levene	0.179154
Levene	0.91852
Levene	0.283274
Levene	0.696123
Levene	0.00523196
Levene	0.537599
Levene	0.529495
Levene	0.120856
Levene	0.589152
Levene	0.938192
Levene	0.0822054
Levene	0.915505
Levene	0.573087
Levene	0.621361
Levene	0.184352
Levene	0.362311
Levene	0.239436
Levene	0.00109586
Levene	0.104687
Levene	0.00868131
Levene	0.783848
Levene	0.0200315
Levene	0.0688165
Levene	0.379868
Levene	0.550354
Levene	0.440872
Levene	0.774938
Levene	0.0275048
Levene	0.881002
Levene	0.112754
Levene	0.236493
Levene	0.85064
Levene	0.0421359
Levene	0.862657
Levene	0.517593
Levene	0.838474
Levene	0.414637
Levene	0.617848
Levene	0.649776
Levene	0.0454651
Levene	0.910443
Levene	0.218591
Levene	0.46506
Levene	0.357166
Levene	0.00959922
Levene	0.345062
Levene	0.183348
Levene	0.116253
Levene	0.137969
Levene	0.0102907
Levene	0.667236
Levene	0.146198
Levene	0.398882
Levene	0.829564
Levene	0.551944
Levene	0.215617
Levene	0.0259515
Levene	0.651966
Levene	0.486437
Levene	0.0122794
Levene	0.020555
Levene	0.79797
Levene	0.104366
Levene	0.0420787
Levene	0.0406941
Levene	0.0827401
Levene	0.038193
Levene	0.72922
Levene	0.486497
Levene	0.0377291
Levene	0.672647
Levene	0.535709
Levene	0.793293
Levene	0.0506656
Levene	0.447783
Levene	0.491584
Levene	0.442235
Levene	0.549388
Levene	0.734424
Levene	0.11551
Levene	0.0414484
Levene	0.404341
Levene	0.0728209
Levene	0.513153
Levene	0.557834
Levene	0.0747245
Levene	0.672982
Levene	0.522099
Levene	0.094353
Levene	0.301278
Levene	0.799704
Levene	0.916836
Levene	0.380052
Levene	0.151898
Levene	0.224287
Levene	0.963525
Levene	0.9491
Levene	0.816616
Levene	0.104739
Levene	0.760961
Levene	0.65144
Levene	0.101225
Levene	0.0544796
Levene	0.661874
Levene	0.293256
Levene	0.916758
Levene	4.94891e-05
Levene	0.690808
Levene	0.267017
Levene	0.508808
Levene	0.0473443
Levene	0.116457
Levene	0.605794
Levene	0.0477551
Levene	0.0220401
Levene	0.51561
Levene	0.0508177
Levene	0.099925
Levene	0.998155
Levene	0.744854
Levene	0.689176
Levene	0.367912
Levene	0.304848
Levene	0.0474386
Levene	0.465193
Levene	0.25268
Levene	0.71546
Levene	0.000135017
Levene	0.882623
Levene	0.0081998
Levene	0.424759
Levene	0.0174938
Levene	0.169173
Levene	0.33789
Levene	0.401554
Levene	0.0173673
Levene	0.272631
Levene	0.415641
Levene	0.53523
Levene	0.787435
Levene	0.394287
Levene	0.424545
Levene	0.0693524
Levene	0.0260682
Levene	0.00257036
Levene	0.978486
Levene	0.790791
Levene	0.17627
Levene	0.257299
Levene	0.158688
Levene	0.158131
Levene	0.223308
Levene	0.30391
Levene	0.225894
Levene	0.369869
Levene	0.375691
Levene	0.0716725
Levene	0.54795
Levene	0.565067
Levene	0.612563
Levene	0.41819
Levene	0.251375
Levene	0.355427
Levene	0.912129
Levene	0.686453
Levene	0.314156
Levene	0.379467
Levene	0.458336
Levene	0.305261
Levene	0.82703
Levene	0.895993
Levene	0.689706
Levene	0.583062
Levene	0.281775
Levene	0.857115
Levene	0.63718
Levene	0.661636
Levene	0.714074
Levene	0.740174
Levene	0.166798
Levene	0.190103
Levene	0.0817022
Levene	0.0721125
Levene	0.583377
Levene	0.106939
Levene	0.735731
Levene	0.130627
Levene	0.489631
Levene	0.534951
Levene	0.582918
Levene	0.222119
Levene	0.923348
Levene	0.0185472
Levene	0.921756
Levene	0.886149
Levene	0.109479
Levene	0.491127
Levene	0.261685
Levene	0.386662
Levene	0.321793
Levene	0.580109
Levene	0.323567
Levene	0.535221
Levene	0.303496
Levene	0.073458
Levene	0.0275882
Levene	0.797454
Levene	0.125633
Levene	0.50262
Levene	0.175646
Levene	0.768609
Levene	0.21234
Levene	0.482669
Levene	0.498604
Levene	0.0116493
Levene	5.14524e-05
Levene	0.191233
Levene	0.00508244
Levene	0.554716
Levene	0.563816
Levene	0.347332
Levene	0.990085
Levene	0.209708
Levene	0.203699
Levene	0.00134187
Levene	0.168233
Levene	0.95066
Levene	0.0202065
Levene	0.0313628
Levene	0.763348
Levene	0.154208
Levene	0.113747
Levene	0.0166665
Levene	0.745621
Levene	0.141951
Levene	0.140243
Levene	0.00180916
Levene	0.44462
Levene	0.440611
Levene	0.49639
Levene	0.511762
Levene	0.711757
Levene	0.00798443
Levene	0.133042
Levene	0.164916
Levene	0.469941
Levene	0.692631
Levene	0.000803138
Levene	0.17037
Levene	0.44519
Levene	0.361285
Levene	0.294332
Levene	0.824394
Levene	0.209033
Levene	0.310581
Levene	0.0419925
Levene	0.367988
Levene	0.7722
Levene	0.307122
Levene	0.899418
Levene	0.0380407
Levene	0.251955
Levene	0.388855
Levene	0.166303
Levene	0.755548
Levene	0.595181
Levene	0.023537
Levene	0.190319
Levene	0.496815
Levene	0.650255
Levene	0.441297
Levene	0.425612
Levene	0.234051
Levene	0.0632986
Levene	0.00222899
Levene	0.552912
Levene	0.467485
Levene	0.261028
Levene	0.438832
Levene	0.2966
Levene	0.789483
Levene	0.259965
Levene	0.00184638
Levene	0.965853
Levene	0.0182796
Levene	0.237588
Levene	0.741026
Levene	0.225763
Levene	0.00384182
Levene	0.325822
Levene	0.238281
Levene	2.25205e-06
Levene	0.100316
Levene	0.269852
Levene	0.645181
Levene	0.592679
Levene	6.66362e-05
Levene	0.980615
Levene	0.658086
Levene	0.0746725
Levene	0.0448686
Levene	0.201547
Levene	0.497794
Levene	0.166104
Levene	0.337001
Levene	0.777186
Levene	0.25162
Levene	0.10442
Levene	0.00944147
Levene	0.516379
Levene	0.888227
Levene	0.192848
Levene	0.54098
Levene	0.273909
Levene	0.886786
Levene	0.387235
Levene	0.332909
Levene	0.0373002
Levene	0.551713
Levene	0.43515
Levene	0.11206
Levene	0.816343
Levene	0.941376
Levene	0.636809
Levene	0.929666
Levene	0.00799002
Levene	0.204962
Levene	0.39297
Levene	0.101621
Levene	0.20456
Levene	0.95889
Levene	0.396272
Levene	0.480986
Levene	0.0467521
Levene	0.295587
Levene	0.31979
Levene	0.0154823
Levene	0.460116
Levene	0.120165
Levene	0.258954
Levene	0.884927
Levene	0.0333113
Levene	0.227853
Levene	0.909489
Levene	0.961668
Levene	0.223415
Levene	0.553888
Levene	0.664997
Levene	0.583765
Levene	0.680041
Levene	0.66383
Levene	0.530665
Levene	5.28774e-06
Levene	0.109417
Levene	0.0110856
Levene	0.0052946
Levene	0.131494
Levene	0.355112
Levene	0.133793
Levene	0.571707
Levene	0.155752
Levene	0.239195
Levene	0.633726
Levene	0.0395327
Levene	0.95709
Levene	0.00964212
Levene	0.00518955
Levene	0.48062
Levene	0.293203
Levene	0.00195404
Levene	0.182821
Levene	0.486853
Levene	0.747573
Levene	0.540964
Levene	0.728548
Levene	0.0981907
Levene	0.686474
Levene	0.236145
Levene	0.587168
Levene	0.40651
Levene	0.707194
Levene	0.877034
Levene	0.90781
Levene	0.408934
Levene	0.0942135
Levene	0.0575874
Levene	0.88942
Levene	0.000393587
Levene	0.0538589
Levene	0.065267
Levene	0.958526
Levene	0.174582
Levene	0.0119432
Levene	0.425435
Levene	0.161973
Levene	0.612126
Levene	0.875107
Levene	0.0011884
Levene	0.00853162
Levene	0.228574
Levene	0.318185
Levene	0.000121639
Levene	0.77833
Levene	0.821311
Levene	0.0980767
Levene	0.00108852
Levene	0.666224
Levene	0.237167
Levene	0.433321
Levene	0.577069
Levene	0.372791
Levene	0.528494
Levene	0.114957
Levene	0.160356
Levene	0.222848
Levene	0.892594
Levene	0.0614288
Levene	0.316015
Levene	0.0981459
Levene	0.618833
Levene	0.10264
Levene	0.505617
Levene	0.520497
Levene	0.873916
Levene	0.824127
Levene	0.00376158
Levene	0.176198
Levene	0.0199241
Levene	0.767725
Levene	0.396347
Levene	0.311009
Levene	0.00165782
Levene	0.207358
Levene	0.357316
Levene	0.460059
Levene	0.274631
Levene	0.463671
Levene	0.00255756
Levene	0.906707
Levene	0.0909763
Levene	0.234762
Levene	0.0110993
Levene	0.123022
Levene	0.000722904
Levene	0.00999667
Levene	0.37205
Levene	0.419576
Levene	0.385216
Levene	0.203875
Levene	0.0734622
Levene	0.142729
Levene	0.252033
Levene	0.738931
Levene	0.199022
Levene	0.665174
Levene	0.00239091
Levene	0.644918
Levene	0.663157
Levene	0.908746
Levene	0.657676
Levene	0.177685
Levene	0.130348
Levene	0.244506
Levene	0.563606
Levene	0.275439
Levene	0.506504
Levene	0.491913
Levene	0.327577
Levene	0.640231
Levene	0.00293508
Levene	6.08347e-07
Levene	0.0297004
Levene	0.260471
Levene	0.631201
Levene	0.0117825
Levene	0.966144
Levene	0.440216
Levene	0.480493
Levene	0.410916
Levene	0.562977
Levene	0.593541
Levene	0.0123095
Levene	0.262315
Levene	0.0228014
Levene	0.286839
Levene	0.823702
Levene	0.114242
Levene	0.326183
Levene	0.367461
Levene	0.734227
Levene	0.100358
Levene	0.59466
Levene	0.0796047
Levene	0.0825153
Levene	0.584526
Levene	0.68832
Levene	0.691196
Levene	0.0478168
Levene	0.0163765
Levene	0.655747
Levene	0.0234913
Levene	0.442883
Levene	0.00801718
Levene	0.894696
Levene	0.804242
Levene	0.633794
Levene	0.385309
Levene	0.130745
Levene	0.371032
Levene	0.874427
Levene	0.888701
Levene	0.6202
Levene	0.0300412
Levene	0.90229
Levene	0.271398
Levene	0.775226
Levene	0.375392
Levene	0.405182
Levene	0.465273
Levene	0.0799318
Levene	0.0221945
Levene	0.0415292
Levene	0.198763
Levene	0.258678
Levene	0.0321724
Levene	0.038081
Levene	0.00700525
Levene	0.464842
Levene	0.765805
Levene	0.0373057
Levene	0.638782
Levene	0.751297
Levene	0.65416
Levene	0.819712
Levene	0.909125
Levene	0.0537041
Levene	0.760378
Levene	0.2554
Levene	0.793074
Levene	0.0422897
Levene	0.347361
Levene	0.000307303
Levene	0.791302
Levene	0.20535
Levene	6.04602e-05
Levene	0.895933
Levene	0.79588
Levene	0.2285
Levene	0.922392
Levene	0.457628
Levene	0.135851
Levene	0.681823
Levene	0.121237
Levene	0.232468
Levene	0.124696
Levene	0.591085
Levene	0.00290022
Levene	0.483682
Levene	0.757815
Levene	0.0282586
Levene	0.96801
Levene	0.0137219
Levene	0.3271
Levene	0.33067
Levene	0.973297
Levene	0.000447827
Levene	0.000748432
Levene	0.844635
Levene	0.677032
Levene	0.00467042
Levene	0.936738
Levene	0.0420984
Levene	0.176499
Levene	0.00568929
Levene	0.529432
Levene	0.375161
Levene	1.30194e-06
Levene	0.785709
Levene	0.868478
Levene	0.452792
Levene	5.9019e-05
Levene	0.000994487
Levene	0.292057
Levene	0.0215004
Levene	0.200168
Levene	0.391655
Levene	0.229087
Levene	0.854025
Levene	0.114264
Levene	0.0153141
Levene	0.511614
Levene	0.212639
Levene	0.0787469
Levene	0.701601
Levene	0.391004
Levene	0.723163
Levene	1.88792e-05
Levene	0.451746
Levene	0.675792
Levene	0.053115
Levene	0.0848447
Levene	0.566735
Levene	0.026735
Levene	0.810806
Levene	0.286725
Levene	0.391281
Levene	0.493513
Levene	0.187994
Levene	0.463018
Levene	0.890629
Levene	0.0458109
Levene	0.0111666
Levene	0.935862
Levene	0.345567
Levene	0.63761
Levene	0.565132
Levene	0.432518
Levene	0.529791
Levene	0.0958919
Levene	0.0146948
Levene	0.234282
Levene	0.701057
Levene	0.0124344
Levene	0.29027
Levene	0.729017
Levene	0.0274206
Levene	0.362612
Levene	0.738658
Levene	0.00127862
Levene	0.196423
Levene	0.12196
Levene	0.835433
Levene	0.653724
Levene	0.0734482
Levene	0.267577
Levene	0.514959
Levene	0.229131
Levene	0.855803
Levene	0.532099
Levene	0.941291
Levene	0.660047
Levene	0.649289
Levene	0.31783
Levene	0.266474
Levene	0.188832
Levene	0.07809
Levene	0.0281617
Levene	0.515432
Levene	0.378974
Levene	0.374331
Levene	0.125402
Levene	0.391693
Levene	0.65391
Levene	0.263777
Levene	0.702236
Levene	0.0365048
Levene	0.00216531
Levene	0.697919
Levene	0.298291
Levene	0.660238
Levene	0.760081
Levene	0.909401
Levene	0.00104837
Levene	0.154078
Levene	0.958882
Levene	0.254565
Levene	0.0127731
Levene	0.145056
Levene	0.52948
Levene	0.205857
Levene	0.086698
Levene	0.322304
Levene	0.849329
Levene	0.490604
Levene	0.237104
Levene	0.0516404
Levene	0.265232
Levene	0.1027
Levene	0.824184
Levene	0.21251
Levene	0.00113892
Levene	0.330161
Levene	0.00025178
Levene	0.420758
Levene	0.418151
Levene	0.0265228
Levene	0.169211
Levene	0.20551
Levene	0.181531
Levene	0.235535
Levene	0.486705
Levene	0.881128
Levene	0.768819
Levene	0.000553065
Levene	0.585947
Levene	0.00445617
Levene	0.741776
Levene	0.599369
Levene	0.215486
Levene	0.21188
Levene	0.0030787
Levene	0.000361588
Levene	0.420589
Levene	0.00604384
Levene	4.60756e-06
Levene	0.247028
Levene	0.614523
Levene	0.308434
Levene	0.396974
Levene	0.984268
Levene	0.927453
Levene	0.898783
Levene	0.618164
Levene	0.822876
Levene	0.462581
Levene	0.130403
Levene	0.939774
Levene	0.202956
Levene	0.00218558
Levene	0.806867
Levene	0.321651
Levene	0.487011
Levene	0.528682
Levene	0.982478
Levene	0.0136889
Levene	0.0832152
Levene	0.111767
Levene	0.00349048
Levene	0.879892
Levene	0.378784
Levene	0.623892
Levene	0.240864
Levene	0.404209
Levene	0.124836
Levene	0.667416
Levene	0.568848
Levene	0.985249
Levene	0.0881863
Levene	0.895882
Levene	0.112595
Levene	0.658299
Levene	0.514488
Levene	0.377056
Levene	0.101935
Levene	0.000177897
Levene	0.208453
Levene	0.203021
Levene	0.0073365
Levene	0.788152
Levene	0.639038
Levene	0.156016
Levene	0.272314
Levene	0.791113
Levene	0.00643848
Levene	0.268155
Levene	0.769351
Levene	0.978411
Levene	0.583629
Levene	0.240509
Levene	0.0983795
Levene	0.263176
Levene	0.311702
Levene	0.00499585
Levene	0.229229
Levene	0.133701
Levene	0.964354
Levene	0.231911
Levene	0.0334496
Levene	0.500279
Levene	0.346958
Levene	0.623932
Levene	0.855511
Levene	0.970807
Levene	0.36471
Levene	0.0193032
Levene	0.446454
Levene	0.109779
Levene	0.160023
Levene	0.307841
Levene	0.352197
Levene	0.769327
Levene	0.906572
Levene	0.47607
Levene	0.171965
Levene	0.0198504
Levene	0.198851
Levene	0.844101
Levene	0.277109
Levene	0.77772
Levene	0.376854
Levene	0.854488
Levene	0.104764
Levene	0.123341
Levene	0.00602547
Levene	0.429227
Levene	0.077608
Levene	0.316653
Levene	0.677732
Levene	0.907948
Levene	0.427184
Levene	0.000125756
Levene	0.214789
Levene	0.402227
Levene	0.570909
Levene	0.281734
Levene	0.92649
Levene	0.0468252
Levene	0.0746204
Levene	0.210442
Levene	0.480462
Levene	0.657419
Levene	0.3682
Levene	0.290009
Levene	0.494633
Levene	0.916252
Levene	0.556081
Levene	0.559666
Levene	0.115284
Levene	0.680327
Levene	0.471666
Levene	0.849719
Levene	0.236256
Levene	0.213382
Levene	0.277341
Levene	0.171458
Levene	0.236873
Levene	0.986568
Levene	0.225534
Levene	0.361716
Levene	0.655472
Levene	0.43613
Levene	0.412562
Levene	0.0165114
Levene	0.439971
Levene	0.021277
Levene	0.609321
Levene	0.130797
Levene	0.634605
Levene	0.506013
Levene	0.494644
Levene	0.62486
Levene	0.389203
Levene	0.169334
Levene	0.954157
Levene	0.232248
Levene	0.464707
Levene	0.123164
Levene	0.264884
Levene	0.00277336
Levene	0.631776
Levene	0.490012
Levene	0.719889
Levene	0.055149
Levene	0.2906
Levene	0.694624
Levene	0.000485248
Levene	0.213928
Levene	0.705137
Levene	0.79561
Levene	0.341218
Levene	0.387246
Levene	0.489557
Levene	0.202903
Levene	0.350346
Levene	0.791033
Levene	0.00303727
Levene	0.781608
Levene	0.000656606
Levene	0.134451
Levene	0.167213
Levene	0.00579005
Levene	0.985913
Levene	0.08711
Levene	0.348823
Levene	0.742393
Levene	0.0934523
Levene	0.341733
Levene	0.0184526
Levene	0.00208253
Levene	0.278796
Levene	0.145013
Levene	0.484263
Levene	0.260574
Levene	0.382896
Levene	0.189776
Levene	0.313733
Levene	0.996089
Levene	0.216513
Levene	0.942949
Levene	0.0530736
Levene	0.0107306
Levene	0.1089
Levene	0.385864
Levene	0.929466
Levene	0.443633
Levene	0.577518
Levene	0.568203
Levene	0.712673
Levene	0.558935
Levene	0.830511
Levene	0.51211
[truncated: 6,875 more rows]

## Sheet: table1_log2getmm_dist_test_res
Samples	Mann_Whitney_U_Stat	p_value_exact	p_value_rounded
p1 vs p1_sim1	9592384	0.0374376	0.0374
p1 vs p1_sim2	9585526	0.0325334	0.0325
p1 vs p1_sim3	9615091	0.0583873	0.0584
wt vs wt_sim1	9799139	0.713243	0.7132
wt vs wt_sim2	9828775	0.902979	0.903
wt vs wt_sim3	9830541	0.91458	0.9146
Samples	Kolmogorov_Smirnov_D_Stat	p_value_exact	p_value_rounded
p1 vs p1_sim1	0.0971377	0.000225327	0.0002
p1 vs p1_sim2	0.0955601	0.000225327	0.0002
p1 vs p1_sim3	0.0878972	0.000225327	0.0002
wt vs wt_sim1	0.111336	0.000225327	0.0002
wt vs wt_sim2	0.109083	0.000225327	0.0002
wt vs wt_sim3	0.11066	0.000225327	0.0002
Samples	Cramer_von_Mises_Stat	p_value_exact	p_value_rounded
p1 vs p1_sim1	30.9954	0.000112689	0.0001
p1 vs p1_sim2	32.2012	0.000112689	0.0001
p1 vs p1_sim3	27.2205	0.000112689	0.0001
wt vs wt_sim1	37.8404	0.000112689	0.0001
wt vs wt_sim2	36.3882	0.000112689	0.0001
wt vs wt_sim3	34.4631	0.000112689	0.0001

## Sheet: table2_operon_consistency_nest
One Sample t-test
data: outer_bootstrap_results
t = 204.74, df = 999, p-value < 2.2e-16
alternative hypothesis: true mean is greater than 0.9
95 percent confidence interval:
0.9165461 Inf
sample estimates:
mean of x
0.91668

## Sheet: unfiltered_deseq_res
log2MeanGeTMM	log2FoldChange	lfcSE	stat	pvalue	padj	start	end	gene_length	strand	product	seed_ortholog	evalue	score	eggNOG_OGs	max_annot_lvl	COG_category	Description	Preferred_name	PFAMs
10.8692	-2.19174	0.241285	-9.08361	1.05034e-19	3.30857e-17	28	390	362	-	hypothetical protein	1235803.C825_01649	3.97e-71	236	2EXZP@1|root,33R8R@2|Bacteria,4P0UW@976|Bacteroidetes,2FWYR@200643|Bacteroidia	976|Bacteroidetes	NA	NA	NA	NA
8.94188	-2.59852	0.22191	-11.7098	1.13588e-31	1.52066e-28	624	857	233	-	hypothetical protein	1235803.C825_01649	8.77e-26	106	2EXZP@1|root,33R8R@2|Bacteria,4P0UW@976|Bacteroidetes,2FWYR@200643|Bacteroidia	976|Bacteroidetes	NA	NA	NA	NA
8.4354	-1.90587	0.174444	-10.9254	8.71622e-28	7.77923e-25	993	1595	602	-	hypothetical protein	1235803.C825_01649	1.95e-127	390	2EXZP@1|root,33R8R@2|Bacteria,4P0UW@976|Bacteroidetes,2FWYR@200643|Bacteroidia	976|Bacteroidetes	NA	NA	NA	NA
8.19211	-3.43855	0.238956	-14.3899	5.99107e-47	1.60411e-43	1607	2194	587	-	hypothetical protein	1235803.C825_01649	3.14e-127	390	2EXZP@1|root,33R8R@2|Bacteria,4P0UW@976|Bacteroidetes,2FWYR@200643|Bacteroidia	976|Bacteroidetes	NA	NA	NA	NA
9.00395	-2.24896	0.190633	-11.7973	4.02884e-32	7.19148e-29	2298	3260	962	+	Bifunctional riboflavin kinase/FMN adenylyltransferase	1235803.C825_01650	1.34e-233	642	COG0196@1|root,COG0196@2|Bacteria,4NEI9@976|Bacteroidetes,2FM7A@200643|Bacteroidia,22WPE@171551|Porphyromonadaceae	976|Bacteroidetes	H	Belongs to the ribF family	ribF	FAD_syn,Flavokinase
8.60408	-2.87235	0.183601	-15.6446	3.61865e-55	1.93779e-51	3297	4352	1055	+	Putative succinyl-diaminopimelate desuccinylase DapE	1235803.C825_01651	2.6e-258	707	COG0624@1|root,COG0624@2|Bacteria,4NE2G@976|Bacteroidetes,2FN2Z@200643|Bacteroidia,22X74@171551|Porphyromonadaceae	976|Bacteroidetes	E	COG0624 Acetylornithine deacetylase Succinyl-diaminopimelate desuccinylase and related	argE	M20_dimer,Peptidase_M20,Peptidase_M28
8.59122	-1.50691	0.158293	-9.51976	1.73582e-21	7.15026e-19	4357	5640	1283	+	hypothetical protein	1235803.C825_01652	1.98e-296	810	COG2244@1|root,COG2244@2|Bacteria,4NRKF@976|Bacteroidetes,2FWB9@200643|Bacteroidia,22ZWW@171551|Porphyromonadaceae	976|Bacteroidetes	S	Polysaccharide biosynthesis protein	NA	Polysacc_synt,Polysacc_synt_C
8.55986	-0.942199	0.165603	-5.68949	1.27416e-08	4.51861e-07	5706	7373	1667	-	Uridine kinase	1235803.C825_01653	0	1116	COG0441@1|root,COG0572@1|root,COG0441@2|Bacteria,COG0572@2|Bacteria,4NIHT@976|Bacteroidetes,2FP3D@200643|Bacteroidia,22VXU@171551|Porphyromonadaceae	976|Bacteroidetes	FJ	ATPase (AAA	udk2	PRK
8.5474	-0.680439	0.15653	-4.34702	1.38e-05	0.000216712	7457	9148	1691	+	hypothetical protein	1235803.C825_01654	0	1055	COG1283@1|root,COG1283@2|Bacteria,4NHMY@976|Bacteroidetes,2FMJB@200643|Bacteroidia,22ZS4@171551|Porphyromonadaceae	976|Bacteroidetes	P	Na+/Pi-cotransporter	NA	Na_Pi_cotrans,PhoU
8.08748	-0.0557005	0.181502	-0.306886	0.75893	0.867853	9200	11005	1805	+	hypothetical protein	1235803.C825_01655	0	1127	COG1283@1|root,COG1283@2|Bacteria,4NHMY@976|Bacteroidetes,2FMJB@200643|Bacteroidia,22WCR@171551|Porphyromonadaceae	976|Bacteroidetes	P	Na Pi-cotransporter II-like protein	NA	Na_Pi_cotrans,PhoU
6.52157	-1.06643	1.39407	-0.764972	0.444288	0.644585	11322	11522	200	+	hypothetical protein	NA	NA	NA	NA	NA	NA	NA	NA	NA
7.23628	-1.41964	0.285779	-4.96761	6.77826e-07	1.52511e-05	11517	12476	959	-	hypothetical protein	1235803.C825_01657	1.97e-230	634	28KF4@1|root,2ZA1C@2|Bacteria,4NKYA@976|Bacteroidetes,2FPMQ@200643|Bacteroidia	976|Bacteroidetes	NA	NA	NA	BetR
8.03254	0.0499138	0.170877	0.292104	0.770207	0.876239	12604	14781	2177	-	Sensor histidine kinase RcsC	1235803.C825_01658	0	1423	COG0642@1|root,COG2205@2|Bacteria,4NDXU@976|Bacteroidetes,2FNIT@200643|Bacteroidia,22WZF@171551|Porphyromonadaceae	976|Bacteroidetes	T	PAS domain	NA	GAF,HATPase_c,HisKA,PAS_3,PAS_4
7.75955	0.035263	0.181277	0.194526	0.845764	0.917558	14984	16438	1454	+	RNA polymerase sigma-54 factor	1235803.C825_01659	0	910	COG1508@1|root,COG1508@2|Bacteria,4NE5B@976|Bacteroidetes,2FM52@200643|Bacteroidia,22VUP@171551|Porphyromonadaceae	976|Bacteroidetes	K	RNA polymerase sigma54 factor	rpoN	Sigma54_AID,Sigma54_CBD,Sigma54_DBD
6.07897	-0.360929	0.56815	-0.635269	0.525253	0.707071	16451	17071	620	+	hypothetical protein	1235803.C825_01660	4.51e-141	399	COG0671@1|root,COG0671@2|Bacteria,4NPUG@976|Bacteroidetes,2FSUS@200643|Bacteroidia,22YR5@171551|Porphyromonadaceae	976|Bacteroidetes	I	Psort location CytoplasmicMembrane, score 10.00	NA	PAP2
3.74209	-6.60464	3.42549	-1.92808	0.0538446	0.148674	17088	17468	380	+	Glycine cleavage system H protein	1235803.C825_01661	5.49e-85	250	COG0509@1|root,COG0509@2|Bacteria,4NQ35@976|Bacteroidetes,2FT3J@200643|Bacteroidia,22Y67@171551|Porphyromonadaceae	976|Bacteroidetes	E	The glycine cleavage system catalyzes the degradation of glycine. The H protein shuttles the methylamine group of glycine from the P protein to the T protein	gcvH	GCV_H
6.63888	-1.3071	0.388486	-3.36461	0.000766519	0.00570892	17469	17975	506	+	N5-carboxyaminoimidazole ribonucleotide mutase	1235803.C825_01662	5.09e-108	312	COG0041@1|root,COG0041@2|Bacteria,4NME9@976|Bacteroidetes,2FMWN@200643|Bacteroidia,22XMM@171551|Porphyromonadaceae	976|Bacteroidetes	F	Catalyzes the conversion of N5-carboxyaminoimidazole ribonucleotide (N5-CAIR) to 4-carboxy-5-aminoimidazole ribonucleotide (CAIR)	purE	AIRC
7.79743	-0.2315	0.158277	-1.46262	0.143571	0.30216	18162	20000	1838	+	4-hydroxy-3-methylbut-2-en-1-yl diphosphate synthase (ferredoxin)	1235803.C825_01663	0	1217	COG0821@1|root,COG0821@2|Bacteria,4NE63@976|Bacteroidetes,2FM97@200643|Bacteroidia,22WAH@171551|Porphyromonadaceae	976|Bacteroidetes	I	Converts 2C-methyl-D-erythritol 2,4-cyclodiphosphate (ME-2,4cPP) into 1-hydroxy-2-methyl-2-(E)-butenyl 4-diphosphate	ispG	GcpE
6.1461	-1.44117	0.976924	-1.47521	0.140156	0.296771	20040	20474	434	+	Deoxyuridine 5'-triphosphate nucleotidohydrolase	1235803.C825_01664	7.09e-101	292	COG0756@1|root,COG0756@2|Bacteria,4NNI4@976|Bacteroidetes,2FR7A@200643|Bacteroidia,22XVH@171551|Porphyromonadaceae	976|Bacteroidetes	F	This enzyme is involved in nucleotide metabolism it produces dUMP, the immediate precursor of thymidine nucleotides and it decreases the intracellular concentration of dUTP so that uracil cannot be incorporated into DNA	dut	dUTPase
7.85489	-0.0868089	0.149147	-0.582037	0.560542	0.734092	20604	22364	1760	+	Beta-barrel assembly-enhancing protease	1235803.C825_01665	0	1103	COG0457@1|root,COG0457@2|Bacteria,4NDVW@976|Bacteroidetes,2FMY8@200643|Bacteroidia,22WHK@171551|Porphyromonadaceae	976|Bacteroidetes	NU	Tetratricopeptide repeat	NA	TPR_16,TPR_19,TPR_2,TPR_6,TPR_8
6.81265	-0.502417	0.312263	-1.60896	0.107626	0.248206	22361	23239	878	+	hypothetical protein	1235803.C825_01666	2.54e-205	568	2C1B9@1|root,32R9M@2|Bacteria,4NR1Y@976|Bacteroidetes,2FR82@200643|Bacteroidia,22YET@171551|Porphyromonadaceae	976|Bacteroidetes	S	Domain of unknown function (DUF4292)	NA	DUF4292
7.48556	-0.123959	0.178237	-0.695474	0.486758	0.677863	23242	24540	1298	+	Murein hydrolase activator EnvC	1235803.C825_01667	3.13e-231	645	COG4942@1|root,COG4942@2|Bacteria,4NH2T@976|Bacteroidetes,2FN4U@200643|Bacteroidia,22VZM@171551|Porphyromonadaceae	976|Bacteroidetes	D	peptidase	yibP	Peptidase_M23
6.33352	-0.0932348	0.629322	-0.148151	0.882223	0.938355	24597	25127	530	+	Chromate transport protein	1235803.C825_01668	2.69e-116	333	COG2059@1|root,COG2059@2|Bacteria,4NNZ1@976|Bacteroidetes,2FPBG@200643|Bacteroidia,22XYA@171551|Porphyromonadaceae	976|Bacteroidetes	P	Chromate transporter	NA	Chromate_transp
5.60614	-1.21827	0.604824	-2.01425	0.0439829	0.128564	25129	25680	551	+	putative chromate transport protein	1235803.C825_01669	6.57e-125	356	COG2059@1|root,COG2059@2|Bacteria,4NNF5@976|Bacteroidetes,2FP4K@200643|Bacteroidia,22XY1@171551|Porphyromonadaceae	976|Bacteroidetes	P	Chromate transporter	NA	Chromate_transp
5.89578	0.775186	1.13404	0.683559	0.494254	0.682662	25681	26118	437	-	hypothetical protein	1235803.C825_01670	1.6e-93	273	2E7M8@1|root,33235@2|Bacteria,4NV43@976|Bacteroidetes,2FUMD@200643|Bacteroidia,23152@171551|Porphyromonadaceae	976|Bacteroidetes	S	Domain of unknown function (DUF5053)	NA	DUF5053
7.76505	-0.320065	0.466291	-0.686407	0.492456	0.681629	26155	26304	149	-	hypothetical protein	NA	NA	NA	NA	NA	NA	NA	NA	NA
8.38066	0.229862	0.165853	1.38593	0.165767	0.336116	26618	30703	4085	-	hypothetical protein	999419.HMPREF1077_01961	1.71e-17	97.8	2DUTV@1|root,33S7W@2|Bacteria,4P1VI@976|Bacteroidetes,2FWJJ@200643|Bacteroidia,22ZT0@171551|Porphyromonadaceae	976|Bacteroidetes	NA	NA	NA	NA
6.10189	-0.872335	0.727592	-1.19893	0.230554	0.421658	30904	31146	242	+	hypothetical protein	NA	NA	NA	NA	NA	NA	NA	NA	NA
7.87104	-0.0078096	0.156441	-0.0499205	0.960186	0.981071	31189	33564	2375	-	hypothetical protein	1235803.C825_01674	0	1569	COG0358@1|root,COG5545@1|root,COG0358@2|Bacteria,COG5545@2|Bacteria,4NETK@976|Bacteroidetes,2FR42@200643|Bacteroidia	976|Bacteroidetes	L	Protein of unknown function (DUF3987)	NA	DUF3987,PriCT_2,VirE_N
6.75605	-0.133404	1.40098	-0.0952219	0.924139	0.961485	33635	33871	236	-	hypothetical protein	1122931.AUAE01000005_gene3393	2.92e-14	68.2	28ZY9@1|root,2ZMNR@2|Bacteria,4P7N8@976|Bacteroidetes,2FVZY@200643|Bacteroidia	976|Bacteroidetes	S	Domain of unknown function (DUF4248)	NA	DUF4248
7.38117	-0.244083	0.212232	-1.15008	0.250112	0.444963	34057	35154	1097	+	Multidrug resistance protein MdtA	1235803.C825_01676	5.85e-253	695	COG0845@1|root,COG0845@2|Bacteria,4NERP@976|Bacteroidetes,2FMFG@200643|Bacteroidia,22XHS@171551|Porphyromonadaceae	976|Bacteroidetes	M	Belongs to the membrane fusion protein (MFP) (TC 8.A.1) family	NA	HlyD_D23
7.8209	-0.26541	0.195991	-1.3542	0.175674	0.349313	35163	38192	3029	+	Efflux pump membrane transporter BepE	1235803.C825_01677	0	1884	COG0841@1|root,COG0841@2|Bacteria,4NDZG@976|Bacteroidetes,2FM3B@200643|Bacteroidia,22VY6@171551|Porphyromonadaceae	976|Bacteroidetes	V	Belongs to the resistance-nodulation-cell division (RND) (TC 2.A.6) family	bepE_4	ACR_tran
7.21357	-0.351254	0.260911	-1.34626	0.178219	0.352814	38189	39529	1340	+	hypothetical protein	1235803.C825_01678	5.02e-305	848	COG1538@1|root,COG1538@2|Bacteria,4NEMI@976|Bacteroidetes,2FMRJ@200643|Bacteroidia,22W2E@171551|Porphyromonadaceae	976|Bacteroidetes	MU	Outer membrane efflux protein	tolC	OEP
7.66282	0.131937	0.220605	0.598067	0.549795	0.72785	39542	40438	896	+	Xylose operon regulatory protein	1235803.C825_01679	5.93e-162	462	COG1609@1|root,COG2207@1|root,COG1609@2|Bacteria,COG2207@2|Bacteria,4NGPU@976|Bacteroidetes,2FQQ8@200643|Bacteroidia,22XJH@171551|Porphyromonadaceae	976|Bacteroidetes	K	Periplasmic binding protein-like domain	NA	HTH_18,Peripla_BP_3
8.11068	-0.164983	0.24529	-0.672603	0.5012	0.685494	40825	42042	1217	+	N-acetylglucosamine-6-phosphate deacetylase	1235803.C825_01680	3.64e-290	792	COG1820@1|root,COG1820@2|Bacteria,4NJ35@976|Bacteroidetes,2FMRP@200643|Bacteroidia,22XJK@171551|Porphyromonadaceae	976|Bacteroidetes	G	Belongs to the metallo-dependent hydrolases superfamily. NagA family	NA	Amidohydro_1
7.7276	0.615873	0.216205	2.84857	0.00439165	0.0223627	42175	43515	1340	+	Inositol 2-dehydrogenase/D-chiro-inositol 3-dehydrogenase	1235803.C825_01681	0	929	COG0673@1|root,COG0673@2|Bacteria,4NF96@976|Bacteroidetes,2FNTD@200643|Bacteroidia,22X73@171551|Porphyromonadaceae	976|Bacteroidetes	S	Oxidoreductase family, NAD-binding Rossmann fold	NA	GFO_IDH_MocA
7.52029	0.41825	0.193808	2.15806	0.0309232	0.100117	43572	44912	1340	+	L-fucose-proton symporter	1235803.C825_01682	0	868	COG0738@1|root,COG0738@2|Bacteria,4NEYR@976|Bacteroidetes,2FMPP@200643|Bacteroidia,22WJ3@171551|Porphyromonadaceae	976|Bacteroidetes	G	Major Facilitator Superfamily	NA	MFS_1
6.8467	0.568261	0.431374	1.31733	0.187729	0.36609	44918	45706	788	+	Glucosamine-6-phosphate deaminase	1235803.C825_01683	3.06e-194	538	COG0363@1|root,COG0363@2|Bacteria,4NGGK@976|Bacteroidetes,2FM6T@200643|Bacteroidia,22XMS@171551|Porphyromonadaceae	976|Bacteroidetes	G	Glucosamine-6-phosphate isomerases/6-phosphogluconolactonase	NA	Glucosamine_iso
7.21062	0.720611	0.314946	2.28804	0.022135	0.0776246	45719	46714	995	+	hypothetical protein	1235803.C825_01684	2.42e-237	652	COG0673@1|root,COG0673@2|Bacteria,4NHFK@976|Bacteroidetes,2FM3T@200643|Bacteroidia,22WV2@171551|Porphyromonadaceae	976|Bacteroidetes	S	Oxidoreductase family, NAD-binding Rossmann fold	NA	GFO_IDH_MocA
7.99596	0.127917	0.179257	0.713595	0.475477	0.670077	46722	49781	3059	+	TonB-dependent receptor P3	1235803.C825_01685	0	2053	COG1629@1|root,COG1629@2|Bacteria,4NDXS@976|Bacteroidetes,2FKYX@200643|Bacteroidia	976|Bacteroidetes	P	TonB-linked outer membrane protein, SusC RagA family	NA	CarbopepD_reg_2,Plug,TonB_dep_Rec
7.67721	-0.264458	0.165494	-1.598	0.110044	0.251616	49798	51510	1712	+	hypothetical protein	1235803.C825_01686	0	1179	COG0436@1|root,COG0436@2|Bacteria,4PMV0@976|Bacteroidetes,2G0HC@200643|Bacteroidia	976|Bacteroidetes	E	Pfam:SusD	NA	SusD-like_3,SusD_RagB
7.99001	-0.316372	0.158974	-1.99009	0.0465811	0.133741	51523	52890	1367	+	Inositol 2-dehydrogenase/D-chiro-inositol 3-dehydrogenase	1235803.C825_01687	0	935	COG0673@1|root,COG0673@2|Bacteria,4NF9M@976|Bacteroidetes,2FMQW@200643|Bacteroidia,22XJJ@171551|Porphyromonadaceae	976|Bacteroidetes	S	Oxidoreductase family, NAD-binding Rossmann fold	NA	GFO_IDH_MocA,TAT_signal
7.83068	-0.950137	0.2253	-4.21721	2.4734e-05	0.000349474	53273	54064	791	+	hypothetical protein	1235803.C825_01688	2.61e-191	530	COG4122@1|root,COG4122@2|Bacteria,4NG1S@976|Bacteroidetes,2FNB5@200643|Bacteroidia,22YQI@171551|Porphyromonadaceae	976|Bacteroidetes	S	Psort location Cytoplasmic, score	NA	Methyltransf_24
6.35416	-0.0729283	0.432797	-0.168505	0.866186	0.930153	54113	54676	563	+	Corrinoid adenosyltransferase	1235803.C825_01689	2.03e-130	370	COG2096@1|root,COG2096@2|Bacteria,4NFHQ@976|Bacteroidetes,2FQJ0@200643|Bacteroidia,22Y06@171551|Porphyromonadaceae	976|Bacteroidetes	S	adenosyltransferase	yvqK	Cob_adeno_trans
6.87759	-0.165764	0.420617	-0.394098	0.693509	0.822623	54750	54971	221	+	hypothetical protein	1235803.C825_01690	1.61e-48	154	2C8VT@1|root,32RN1@2|Bacteria,4NS78@976|Bacteroidetes,2FTSK@200643|Bacteroidia,22YD9@171551|Porphyromonadaceae	976|Bacteroidetes	S	Protein of unknown function (DUF2795)	NA	DUF2795
7.40815	-0.634235	0.217948	-2.91002	0.00361402	0.0193531	55171	56079	908	+	hypothetical protein	1235803.C825_01691	4.26e-221	609	COG0226@1|root,COG0226@2|Bacteria,4PKGM@976|Bacteroidetes,2G3GH@200643|Bacteroidia,22XC5@171551|Porphyromonadaceae	976|Bacteroidetes	P	Type IX secretion system membrane protein PorP/SprF	NA	PorP_SprF
7.35115	-0.307621	0.220532	-1.39491	0.163044	0.33223	56107	57510	1403	+	Hercynine oxygenase	1235803.C825_01692	0	980	COG1262@1|root,COG1262@2|Bacteria,4NGY2@976|Bacteroidetes,2FPTN@200643|Bacteroidia,22W76@171551|Porphyromonadaceae	976|Bacteroidetes	M	gliding motility-associated lipoprotein GldK	gldK	FGE-sulfatase
7.31333	-0.280238	0.274348	-1.02147	0.307034	0.511563	57567	58637	1070	+	hypothetical protein	1235803.C825_01693	1.85e-180	511	28IG3@1|root,2Z8HM@2|Bacteria,4NFJR@976|Bacteroidetes,2FP1Z@200643|Bacteroidia,22WE3@171551|Porphyromonadaceae	976|Bacteroidetes	S	Gliding motility-associated protein, GldL	gldL	NA
7.17738	-0.862501	0.237457	-3.63223	0.000280979	0.00256765	58661	59950	1289	+	hypothetical protein	1235803.C825_01694	5.83e-262	727	28HG4@1|root,2Z7S0@2|Bacteria,4NE3G@976|Bacteroidetes,2FNU8@200643|Bacteroidia,22WNG@171551|Porphyromonadaceae	976|Bacteroidetes	S	Gliding motility-associated protein GldM	gldM	GldM_C,GldM_N
3.31108	-6.17358	3.99778	-1.54425	0.122527	0.271241	59947	60228	281	+	hypothetical protein	1235803.C825_01694	8.48e-55	184	28HG4@1|root,2Z7S0@2|Bacteria,4NE3G@976|Bacteroidetes,2FNU8@200643|Bacteroidia,22WNG@171551|Porphyromonadaceae	976|Bacteroidetes	S	Gliding motility-associated protein GldM	gldM	GldM_C,GldM_N
7.80604	-0.435562	0.225999	-1.92728	0.0539452	0.148752	60273	61367	1094	+	hypothetical protein	1235803.C825_01695	1.05e-250	689	28H74@1|root,2Z7JF@2|Bacteria,4NFR0@976|Bacteroidetes,2FQ0B@200643|Bacteroidia,22WJE@171551|Porphyromonadaceae	976|Bacteroidetes	S	Gliding motility-associated protein GldN	gldN	NA
8.16119	-0.184431	0.176771	-1.04334	0.296792	0.500162	61720	64944	3224	+	TonB-dependent receptor P26	1235803.C825_01696	0	2171	COG1629@1|root,COG1629@2|Bacteria,COG4771@2|Bacteria,4NDXS@976|Bacteroidetes,2FM37@200643|Bacteroidia,22WEP@171551|Porphyromonadaceae	976|Bacteroidetes	P	TonB-dependent Receptor Plug Domain	NA	CarbopepD_reg_2,Plug,TonB_dep_Rec
7.74131	0.090184	0.177209	0.508912	0.610814	0.768721	64975	66696	1721	+	hypothetical protein	1235803.C825_01697	0	1172	COG1834@1|root,COG1834@2|Bacteria,4NFQ7@976|Bacteroidetes,2FNG1@200643|Bacteroidia,23054@171551|Porphyromonadaceae	976|Bacteroidetes	E	Pfam:SusD	NA	SusD-like_3,SusD_RagB
7.40022	0.0620591	0.381901	0.162501	0.870912	0.933493	66798	67130	332	-	hypothetical protein	NA	NA	NA	NA	NA	NA	NA	NA	NA
7.37113	-0.382086	0.305477	-1.25079	0.211012	0.396342	67362	67847	485	-	hypothetical protein	1235803.C825_01699	1.27e-118	338	COG1705@1|root,COG1705@2|Bacteria	2|Bacteria	NU	amidase activity	NA	Glucosaminidase,Rod-binding
5.09909	-0.201559	1.96062	-0.102803	0.918119	0.958574	67936	68160	224	+	hypothetical protein	1235803.C825_01700	2.17e-51	161	298PA@1|root,2ZQYC@2|Bacteria,4P7SE@976|Bacteroidetes,2FVBS@200643|Bacteroidia	976|Bacteroidetes	S	Domain of unknown function (DUF4248)	NA	DUF4248
7.20249	-0.512528	0.286744	-1.78741	0.0738717	0.188913	68195	68653	458	-	hypothetical protein	1235803.C825_01701	1.58e-101	294	COG0776@1|root,COG0776@2|Bacteria,4NUQD@976|Bacteroidetes,2FU1H@200643|Bacteroidia	976|Bacteroidetes	L	Bacterial DNA-binding protein	NA	Bac_DNA_binding
6.65726	0.599339	0.532486	1.12555	0.260357	0.457419	68906	69259	353	+	hypothetical protein	1235803.C825_01702	1.69e-77	231	COG1396@1|root,COG1396@2|Bacteria,4NNKF@976|Bacteroidetes,2FSGH@200643|Bacteroidia,230H3@171551|Porphyromonadaceae	976|Bacteroidetes	K	Helix-turn-helix domain	NA	HTH_19
6.58235	0.10725	0.41489	0.258502	0.796019	0.890239	69246	69983	737	+	hypothetical protein	1235803.C825_01703	6.62e-176	490	COG2856@1|root,COG2856@2|Bacteria,4NM3X@976|Bacteroidetes,2FP87@200643|Bacteroidia,22Z3Q@171551|Porphyromonadaceae	976|Bacteroidetes	E	IrrE N-terminal-like domain	NA	Peptidase_M78
6.26098	-0.260782	0.511874	-0.509466	0.610426	0.768556	69946	70356	410	+	hypothetical protein	1235803.C825_01704	3.46e-95	277	2DMHX@1|root,32RNA@2|Bacteria,4NPFF@976|Bacteroidetes,2FQ52@200643|Bacteroidia,230DU@171551|Porphyromonadaceae	976|Bacteroidetes	NA	NA	NA	NA
8.05569	0.0210893	0.161959	0.130214	0.896397	0.94604	70528	72735	2207	-	hypothetical protein	1235803.C825_01705	0	1451	COG5545@1|root,COG5545@2|Bacteria,4PMA3@976|Bacteroidetes,2G194@200643|Bacteroidia	976|Bacteroidetes	S	VirE N-terminal domain	NA	DUF3987,PriCT_2,VirE,VirE_N
8.30783	0.0867482	0.274786	0.315694	0.752235	0.863313	72923	73273	350	-	hypothetical protein	NA	NA	NA	NA	NA	NA	NA	NA	NA
8.46333	0.28229	0.180812	1.56124	0.118468	0.265549	73783	78096	4313	-	hypothetical protein	1235803.C825_01465	5.56e-30	138	2DUTV@1|root,33S7W@2|Bacteria,4P1VI@976|Bacteroidetes,2FWJJ@200643|Bacteroidia,22ZT0@171551|Porphyromonadaceae	976|Bacteroidetes	NA	NA	NA	NA
8.38275	0.302254	0.240993	1.2542	0.209769	0.395116	78615	79472	857	-	hypothetical protein	1235803.C825_01708	1.28e-193	538	COG5464@1|root,COG5464@2|Bacteria,4NHVS@976|Bacteroidetes,2G317@200643|Bacteroidia,22Y25@171551|Porphyromonadaceae	976|Bacteroidetes	S	PD-(D/E)XK nuclease family transposase	NA	PDDEXK_2
7.99549	-0.480787	0.181259	-2.65248	0.0079902	0.0364129	79685	82417	2732	-	hypothetical protein	1235803.C825_01709	0	1830	COG1305@1|root,COG1305@2|Bacteria,4NFR8@976|Bacteroidetes,2FPAP@200643|Bacteroidia,22W3W@171551|Porphyromonadaceae	976|Bacteroidetes	E	Transglutaminase-like superfamily	NA	Transglut_core
7.75709	-0.37059	0.163992	-2.25981	0.023833	0.0820745	82487	84004	1517	+	K(+)/H(+) antiporter NhaP2	1235803.C825_01710	0	963	COG3263@1|root,COG3263@2|Bacteria,4NFNS@976|Bacteroidetes,2FMZZ@200643|Bacteroidia,22X6I@171551|Porphyromonadaceae	976|Bacteroidetes	P	Potassium	cvrA	Na_H_Exchanger,TrkA_C
7.91969	-0.174911	0.164899	-1.06071	0.28882	0.491618	84185	85402	1217	-	Thiol-disulfide oxidoreductase ResA	1235803.C825_01711	1.15e-302	824	COG0526@1|root,COG0526@2|Bacteria,4NV4W@976|Bacteroidetes,2FNPM@200643|Bacteroidia	976|Bacteroidetes	CO	COG NOG23392 non supervised orthologous group	NA	AhpC-TSA
7.92172	0.259691	0.1916	1.35538	0.175296	0.349092	85621	87171	1550	+	Protein-glutamate methylesterase/protein-glutamine glutaminase	1235803.C825_01712	0	1030	COG0745@1|root,COG0745@2|Bacteria,4PM6N@976|Bacteroidetes,2G0CY@200643|Bacteroidia,2323Q@171551|Porphyromonadaceae	976|Bacteroidetes	T	PglZ domain	NA	PglZ,Response_reg
6.02095	0.854255	0.46875	1.82241	0.0683928	0.178481	87251	87670	419	+	hypothetical protein	1235803.C825_01713	1.83e-96	280	COG0802@1|root,COG0802@2|Bacteria,4NS89@976|Bacteroidetes,2FS1V@200643|Bacteroidia,22XWD@171551|Porphyromonadaceae	976|Bacteroidetes	S	Hydrolase, P-loop family	yjeE	TsaE
4.97316	-7.83569	3.99556	-1.9611	0.0498677	0.140339	87674	87886	212	+	hypothetical protein	1235803.C825_01714	8.53e-45	144	2C4GM@1|root,33DB5@2|Bacteria,4NY7G@976|Bacteroidetes,2FW01@200643|Bacteroidia,22YXA@171551|Porphyromonadaceae	976|Bacteroidetes	S	Immunity protein 17	NA	Imm17
7.64786	0.924926	0.238753	3.87398	0.000107072	0.00117014	88006	88884	878	+	hypothetical protein	1235803.C825_01715	1.67e-222	612	297R9@1|root,2ZUY5@2|Bacteria,4P73C@976|Bacteroidetes,2FVX9@200643|Bacteroidia	976|Bacteroidetes	NA	NA	NA	NA
7.92564	-0.0552716	0.162033	-0.341113	0.733019	0.850035	88977	91157	2180	-	Ribonuclease R	1235803.C825_01716	0	1414	COG0557@1|root,COG0557@2|Bacteria,4NE7T@976|Bacteroidetes,2FMM6@200643|Bacteroidia,22VY8@171551|Porphyromonadaceae	976|Bacteroidetes	J	3'-5' exoribonuclease that releases 5'-nucleoside monophosphates and is involved in maturation of structured RNAs	rnr	OB_RNB,RNB,S1
7.98903	-0.0824148	0.203248	-0.405488	0.685119	0.817836	91254	92189	935	-	6-deoxy-6-sulfogluconolactonase	1235803.C825_01717	2.07e-237	651	COG3386@1|root,COG3386@2|Bacteria,4NMJX@976|Bacteroidetes,2FRZF@200643|Bacteroidia,22ZI2@171551|Porphyromonadaceae	976|Bacteroidetes	G	SMP-30/Gluconolaconase/LRE-like region	NA	SGL
7.98172	0.228666	0.178687	1.2797	0.200651	0.382787	92611	93741	1130	+	Protein YghO	1235803.C825_01718	1.06e-281	768	COG0454@1|root,COG0456@2|Bacteria,4NFWE@976|Bacteroidetes,2FNG4@200643|Bacteroidia,22WRZ@171551|Porphyromonadaceae	976|Bacteroidetes	K	Psort location Cytoplasmic, score 8.96	yghO	Acetyltransf_1
7.64701	-0.18968	0.190027	-0.998175	0.318194	0.523159	93751	95616	1865	+	DNA gyrase subunit B	1235803.C825_01719	0	1224	COG0187@1|root,COG0187@2|Bacteria,4NF18@976|Bacteroidetes,2FMMD@200643|Bacteroidia,22VXW@171551|Porphyromonadaceae	976|Bacteroidetes	L	DNA topoisomerase (ATP-hydrolyzing)	parE	DNA_gyraseB,DNA_gyraseB_C,HATPase_c,Toprim
5.6368	-0.550817	1.06058	-0.519356	0.603513	0.7633	95640	96101	461	+	Phosphopantetheine adenylyltransferase	1235803.C825_01720	1.29e-105	305	COG0669@1|root,COG0669@2|Bacteria,4NM84@976|Bacteroidetes,2FT6A@200643|Bacteroidia,22Y2B@171551|Porphyromonadaceae	976|Bacteroidetes	H	Reversibly transfers an adenylyl group from ATP to 4'- phosphopantetheine, yielding dephospho-CoA (dPCoA) and pyrophosphate	coaD	CTP_transf_like
8.01607	0.280681	0.137036	2.04822	0.0405382	0.121674	96125	97714	1589	+	hypothetical protein	1235803.C825_01721	0	1026	COG0793@1|root,COG0793@2|Bacteria,4NEGV@976|Bacteroidetes,2FN98@200643|Bacteroidia,22WA5@171551|Porphyromonadaceae	976|Bacteroidetes	M	Belongs to the peptidase S41A family	ctpA	PDZ_2,Peptidase_S41
7.62308	0.551731	0.236698	2.33095	0.0197559	0.0714335	97967	98782	815	+	hypothetical protein	NA	NA	NA	NA	NA	NA	NA	NA	NA
3.7585	0.981067	2.94491	0.33314	0.739029	0.855043	98805	99116	311	-	hypothetical protein	1235803.C825_01723	1.96e-65	199	COG3620@1|root,COG3620@2|Bacteria,4NVN9@976|Bacteroidetes,2FTUJ@200643|Bacteroidia,230S8@171551|Porphyromonadaceae	976|Bacteroidetes	K	Helix-turn-helix domain	NA	HTH_19,HTH_3
6.30137	2.47567	1.33759	1.85084	0.0641926	0.170511	99113	99478	365	-	hypothetical protein	1235803.C825_01724	6.79e-79	234	COG4679@1|root,COG4679@2|Bacteria,4PPZ6@976|Bacteroidetes,2G1AS@200643|Bacteroidia	976|Bacteroidetes	S	Phage derived protein Gp49-like (DUF891)	NA	Gp49
7.5223	0.2741	0.17797	1.54015	0.123524	0.272322	99596	100372	776	-	Omega-amidase YafV	1235803.C825_01725	1.07e-192	533	COG0388@1|root,COG0388@2|Bacteria,4P1PY@976|Bacteroidetes,2FSY3@200643|Bacteroidia,22ZQ1@171551|Porphyromonadaceae	976|Bacteroidetes	S	Carbon-nitrogen hydrolase	NA	CN_hydrolase
8.09371	0.584409	0.198546	2.94344	0.00324586	0.0178211	100519	101157	638	+	Phosphoglycolate phosphatase	1235803.C825_01726	3.06e-151	425	COG0546@1|root,COG0546@2|Bacteria,4NRB4@976|Bacteroidetes,2FTCK@200643|Bacteroidia,22YK0@171551|Porphyromonadaceae	976|Bacteroidetes	S	HAD-hyrolase-like	NA	HAD_2
9.06394	0.301442	0.239238	1.26001	0.207667	0.392183	101679	102224	545	-	hypothetical protein	NA	NA	NA	NA	NA	NA	NA	NA	NA
8.32518	0.207422	0.217866	0.952062	0.341065	0.546861	103047	104420	1373	+	hypothetical protein	1235803.C825_01728	0	922	COG3391@1|root,COG3391@2|Bacteria,4NIIY@976|Bacteroidetes,2FMTX@200643|Bacteroidia,22XRU@171551|Porphyromonadaceae	976|Bacteroidetes	S	IPT/TIG domain	NA	NHL,TIG
7.9211	-0.185611	0.151766	-1.22301	0.221325	0.408988	104443	107526	3083	+	TonB-dependent receptor P3	1235803.C825_01729	0	2035	COG4206@1|root,COG4206@2|Bacteria,4P258@976|Bacteroidetes,2FWW6@200643|Bacteroidia,23270@171551|Porphyromonadaceae	976|Bacteroidetes	H	TonB-dependent Receptor Plug Domain	NA	CarbopepD_reg_2,Plug,TonB_dep_Rec
7.80762	0.215484	0.174086	1.2378	0.215789	0.401931	107538	109559	2021	+	hypothetical protein	1235803.C825_01730	0	1382	COG0614@1|root,COG0614@2|Bacteria,4NHHB@976|Bacteroidetes,2FMQ8@200643|Bacteroidia,22X0C@171551|Porphyromonadaceae	976|Bacteroidetes	P	SusD family	NA	SusD-like_3,SusD_RagB
7.41509	-0.0128898	0.240756	-0.0535391	0.957302	0.979764	109598	110479	881	+	hypothetical protein	1235803.C825_01731	3.89e-208	575	2C2JP@1|root,32RAM@2|Bacteria,4NRKY@976|Bacteroidetes,2FTDZ@200643|Bacteroidia	976|Bacteroidetes	S	Domain of unknown function (DUF4361)	NA	DUF1735,DUF4361
8.00673	-0.0178023	0.208489	-0.0853873	0.931953	0.965039	110617	113205	2588	+	hypothetical protein	1235803.C825_01732	0	1736	COG2373@1|root,COG2373@2|Bacteria,4NG2S@976|Bacteroidetes,2FPX1@200643|Bacteroidia,22Z3N@171551|Porphyromonadaceae	976|Bacteroidetes	P	TonB-dependent Receptor Plug Domain	NA	NA
7.92585	0.697415	0.146682	4.75459	1.98853e-06	3.91491e-05	113206	114297	1091	-	hypothetical protein	1235803.C825_01733	3.73e-264	723	COG2365@1|root,COG2365@2|Bacteria,4NGPX@976|Bacteroidetes,2FWH1@200643|Bacteroidia,22Y1E@171551|Porphyromonadaceae	976|Bacteroidetes	T	Tyrosine phosphatase family	NA	Y_phosphatase3
7.79424	1.11812	0.220052	5.08117	3.75121e-07	9.00796e-06	114509	115396	887	-	hypothetical protein	1235803.C825_01734	3.47e-212	586	COG2250@1|root,COG2250@2|Bacteria,4NNCW@976|Bacteroidetes,2FRJR@200643|Bacteroidia,230PA@171551|Porphyromonadaceae	976|Bacteroidetes	S	HEPN domain	NA	HEPN
7.45607	0.55401	0.227183	2.43861	0.0147439	0.0575044	115454	116620	1166	-	hypothetical protein	1235803.C825_01735	1.07e-287	785	COG3550@1|root,COG3550@2|Bacteria,4NFYY@976|Bacteroidetes,2FP3A@200643|Bacteroidia,22XK9@171551|Porphyromonadaceae	976|Bacteroidetes	S	HipA-like C-terminal domain	NA	Couple_hipA,HipA_C
5.52577	1.89795	1.06941	1.77476	0.0759368	0.193179	116598	116933	335	-	hypothetical protein	1235803.C825_01736	5.4e-69	209	COG1396@1|root,COG1396@2|Bacteria,4NUEP@976|Bacteroidetes,2FT5J@200643|Bacteroidia	976|Bacteroidetes	K	sequence-specific DNA binding	NA	HTH_3
8.07468	1.02075	0.167311	6.10095	1.05438e-09	4.70516e-08	117041	117934	893	-	hypothetical protein	1235803.C825_01737	2.01e-212	587	COG2250@1|root,COG2250@2|Bacteria,4NNCW@976|Bacteroidetes,2FRJR@200643|Bacteroidia,230PA@171551|Porphyromonadaceae	976|Bacteroidetes	S	HEPN domain	NA	HEPN
9.05597	1.18305	0.216252	5.47072	4.48206e-08	1.4114e-06	118158	118559	401	+	hypothetical protein	NA	NA	NA	NA	NA	NA	NA	NA	NA
9.41386	1.15335	0.197136	5.85055	4.89944e-09	1.84764e-07	119457	120035	578	+	[Ribosomal protein S5]-alanine N-acetyltransferase	1235803.C825_01739	6.04e-139	392	COG1670@1|root,COG1670@2|Bacteria,4NR3B@976|Bacteroidetes,2FVYG@200643|Bacteroidia,22ZXT@171551|Porphyromonadaceae	976|Bacteroidetes	J	Acetyltransferase (GNAT) domain	NA	Acetyltransf_3
8.7061	0.421958	0.254092	1.66065	0.0967836	0.231322	120739	121131	392	-	hypothetical protein	1235803.C825_01740	6.84e-90	263	COG4405@1|root,COG4405@2|Bacteria,4PB57@976|Bacteroidetes,2FYFB@200643|Bacteroidia	976|Bacteroidetes	S	ASCH	NA	ASCH
8.48672	0.916841	0.177663	5.16058	2.46191e-07	6.21865e-06	121284	121862	578	-	hypothetical protein	1235803.C825_01741	5.8e-137	387	COG0664@1|root,COG0664@2|Bacteria,4NG9D@976|Bacteroidetes,2FQRZ@200643|Bacteroidia,22YUJ@171551|Porphyromonadaceae	976|Bacteroidetes	T	Cyclic nucleotide-binding domain	NA	cNMP_binding
7.93326	0.610903	0.186469	3.27616	0.0010523	0.00725077	122274	122843	569	+	hypothetical protein	1235803.C825_01742	1.88e-136	385	COG0664@1|root,COG0664@2|Bacteria,4NG9D@976|Bacteroidetes,2FQRZ@200643|Bacteroidia,22YUJ@171551|Porphyromonadaceae	976|Bacteroidetes	T	Cyclic nucleotide-binding domain	NA	cNMP_binding
8.0276	0.34243	0.211883	1.61613	0.106066	0.246196	122840	123334	494	+	hypothetical protein	1235788.C802_03597	1.55e-05	50.1	2AWG1@1|root,31NCA@2|Bacteria,4PJF0@976|Bacteroidetes,2FRKP@200643|Bacteroidia,4AN8H@815|Bacteroidaceae	976|Bacteroidetes	NA	NA	NA	NA
7.6467	0.924034	0.269021	3.4348	0.000592987	0.00458217	123767	124129	362	+	hypothetical protein	1235803.C825_01744	1.95e-82	243	COG3093@1|root,COG3093@2|Bacteria,4NMVH@976|Bacteroidetes,2FUY6@200643|Bacteroidia	976|Bacteroidetes	K	plasmid maintenance system antidote protein	NA	HTH_3
6.71714	1.2249	0.300063	4.08215	4.4621e-05	0.000570275	124119	124769	650	+	hypothetical protein	1235803.C825_01745	2.07e-160	448	COG2253@1|root,COG2253@2|Bacteria,4P9MV@976|Bacteroidetes,2G1MZ@200643|Bacteroidia,23160@171551|Porphyromonadaceae	976|Bacteroidetes	S	Nucleotidyl transferase AbiEii toxin, Type IV TA system	NA	AbiEii
7.34868	0.375515	0.198558	1.89121	0.0585966	0.158878	124944	126002	1058	-	hypothetical protein	1235803.C825_01747	2.08e-269	735	COG0793@1|root,COG0793@2|Bacteria,4NFEN@976|Bacteroidetes,2FMMP@200643|Bacteroidia,22WMS@171551|Porphyromonadaceae	976|Bacteroidetes	M	peptidase S41	NA	Peptidase_S41,Tricorn_C1
6.93801	0.119629	0.395151	0.302742	0.762087	0.869773	126013	126882	869	-	hypothetical protein	1235803.C825_01748	2.97e-210	580	29UC5@1|root,30FNJ@2|Bacteria,4NS0Y@976|Bacteroidetes,2FNR7@200643|Bacteroidia,22Y6Z@171551|Porphyromonadaceae	976|Bacteroidetes	S	Protein of unknown function (DUF3316)	NA	DUF3316
8.00901	-0.0182452	0.170287	-0.107144	0.914674	0.956199	126886	129609	2723	-	DNA topoisomerase 4 subunit A	1235803.C825_01749	0	1790	COG0188@1|root,COG0188@2|Bacteria,4NERI@976|Bacteroidetes,2FPAU@200643|Bacteroidia,22WF8@171551|Porphyromonadaceae	976|Bacteroidetes	L	Belongs to the type II topoisomerase GyrA ParC subunit family	parC	DNA_topoisoIV
7.71077	0.139843	0.229049	0.610538	0.541506	0.721543	129768	130967	1199	+	L-threonine ammonia-lyase	1235803.C825_01750	3.61e-287	784	COG1171@1|root,COG1171@2|Bacteria,4NEY2@976|Bacteroidetes,2FNV5@200643|Bacteroidia,22Y2P@171551|Porphyromonadaceae	976|Bacteroidetes	E	Pyridoxal-phosphate dependent enzyme	ilvA	PALP
7.81133	0.289732	0.193435	1.49783	0.134178	0.288987	131082	132800	1718	-	hypothetical protein	1235803.C825_01751	0	1201	COG3637@1|root,COG3637@2|Bacteria,4PMZG@976|Bacteroidetes,2G0MQ@200643|Bacteroidia,2327F@171551|Porphyromonadaceae	976|Bacteroidetes	M	Pfam:SusD	NA	SusD-like_3,SusD_RagB
8.18309	-0.0570884	0.158569	-0.360022	0.718831	0.839639	132814	135858	3044	-	TonB-dependent receptor SusC	1235803.C825_01752	0	2090	COG1629@1|root,COG1629@2|Bacteria,COG4771@2|Bacteria,4NDXS@976|Bacteroidetes,2FKYX@200643|Bacteroidia,22WRD@171551|Porphyromonadaceae	976|Bacteroidetes	P	TonB dependent receptor	NA	CarbopepD_reg_2,Plug,TonB_dep_Rec
7.98536	0.360625	0.431721	0.835319	0.403538	0.609413	136096	136479	383	+	hypothetical protein	1235803.C825_01753	1.1e-80	239	COG1396@1|root,COG1396@2|Bacteria,4NREN@976|Bacteroidetes,2FSWE@200643|Bacteroidia	976|Bacteroidetes	K	Helix-turn-helix domain	NA	HTH_3
5.03254	-0.88788	1.59879	-0.555345	0.578659	0.746319	136691	136858	167	-	hypothetical protein	483215.BACFIN_06547	3.34e-13	65.1	COG1396@1|root,COG1396@2|Bacteria,4NQS7@976|Bacteroidetes,2FTVJ@200643|Bacteroidia,4ARWT@815|Bacteroidaceae	976|Bacteroidetes	K	Helix-turn-helix domain	NA	HTH_3
8.08223	0.348351	0.153667	2.26693	0.0233948	0.0809297	136855	140016	3161	-	hypothetical protein	1235803.C825_01755	0	2201	COG3537@1|root,COG3537@2|Bacteria,4NDYB@976|Bacteroidetes,2FMMF@200643|Bacteroidia	976|Bacteroidetes	G	Alpha-1,2-mannosidase	NA	CBM-like,Glyco_hydro_92
8.21717	0.0967571	0.182245	0.530918	0.595475	0.757795	140246	142486	2240	-	hypothetical protein	1235803.C825_01756	0	1519	COG1629@1|root,COG4771@2|Bacteria,4NFU8@976|Bacteroidetes,2G2FE@200643|Bacteroidia	976|Bacteroidetes	P	TonB-dependent receptor	NA	CarbopepD_reg_2
8.13116	0.452859	0.168167	2.69292	0.007083	0.0332714	142742	144625	1883	-	hypothetical protein	1235803.C825_01757	0	1164	COG2197@1|root,COG2197@2|Bacteria	2|Bacteria	K	response regulator	NA	GerE,PAS_4,PAS_9
7.80867	0.381713	0.180851	2.11065	0.0348027	0.109352	144812	146119	1307	+	hypothetical protein	1235803.C825_01758	0	871	COG1672@1|root,COG1672@2|Bacteria,4NJ2E@976|Bacteroidetes,2FPC6@200643|Bacteroidia,231WG@171551|Porphyromonadaceae	976|Bacteroidetes	S	Archaea bacterial proteins of unknown function	NA	ATPase_2,DUF234
8.05156	0.373005	0.19943	1.87035	0.0614346	0.164738	146164	146760	596	-	hypothetical protein	1235803.C825_01759	5.31e-136	385	COG0776@1|root,COG0776@2|Bacteria,4P464@976|Bacteroidetes	976|Bacteroidetes	L	DNA-binding protein	NA	NA
8.21719	-0.166128	0.170503	-0.974341	0.329887	0.536618	147197	148633	1436	-	Inositol 2-dehydrogenase/D-chiro-inositol 3-dehydrogenase	1235803.C825_01760	0	1004	COG0673@1|root,COG0673@2|Bacteria,4NH13@976|Bacteroidetes,2FPIH@200643|Bacteroidia,22WA6@171551|Porphyromonadaceae	976|Bacteroidetes	S	Oxidoreductase family, NAD-binding Rossmann fold	NA	GFO_IDH_MocA
8.52411	0.488372	0.170701	2.86099	0.00422323	0.0218296	148759	149313	554	-	General stress protein 14	1235803.C825_01761	3.96e-131	372	COG2249@1|root,COG2249@2|Bacteria,4NR80@976|Bacteroidetes,2G38V@200643|Bacteroidia,231M6@171551|Porphyromonadaceae	976|Bacteroidetes	S	Flavodoxin-like fold	NA	Flavodoxin_2
8.27361	0.0973562	0.151099	0.64432	0.519368	0.702822	149893	153183	3290	+	hypothetical protein	1235803.C825_01762	0	2206	COG1629@1|root,COG4771@2|Bacteria,4NDU8@976|Bacteroidetes,2FMRZ@200643|Bacteroidia,22X4E@171551|Porphyromonadaceae	976|Bacteroidetes	P	TonB dependent receptor	NA	CarbopepD_reg_2,Plug,TonB_dep_Rec
8.25465	0.080309	0.15037	0.534076	0.593289	0.756623	153200	154861	1661	+	hypothetical protein	1235803.C825_01763	0	1150	2DKVB@1|root,30FXK@2|Bacteria,4PNT8@976|Bacteroidetes,2FQ87@200643|Bacteroidia	976|Bacteroidetes	S	Susd and RagB outer membrane lipoprotein	NA	SusD-like,SusD-like_2
8.18329	-0.0132945	0.188593	-0.0704928	0.943801	0.970814	155935	157479	1544	+	Glycine--tRNA ligase	1235803.C825_01764	0	1033	COG0423@1|root,COG0423@2|Bacteria,4NE1C@976|Bacteroidetes,2FMM2@200643|Bacteroidia,22WCA@171551|Porphyromonadaceae	976|Bacteroidetes	J	Catalyzes the attachment of glycine to tRNA(Gly)	glyQS	HGTP_anticodon,tRNA-synt_2b
7.90687	0.0321118	0.261342	0.122873	0.902208	0.94957	157484	158086	602	+	hypothetical protein	1235803.C825_01765	6.24e-145	408	COG0545@1|root,COG0545@2|Bacteria,4NVE8@976|Bacteroidetes,2FRJZ@200643|Bacteroidia	976|Bacteroidetes	M	FkbP-type peptidyl-prolyl cis-trans	NA	FKBP_C
8.25061	-0.0357846	0.162736	-0.219894	0.825954	0.905421	158526	160868	2342	-	hypothetical protein	1235803.C825_01766	0	1593	COG3345@1|root,COG3345@2|Bacteria,4NHM7@976|Bacteroidetes,2FNUE@200643|Bacteroidia,22WN2@171551|Porphyromonadaceae	976|Bacteroidetes	G	alpha-galactosidase	NA	CBM_35
7.73759	-0.304774	0.167312	-1.82159	0.0685175	0.178552	161033	162610	1577	-	SusD-like protein P38	1235803.C825_01767	0	1086	COG3637@1|root,COG3637@2|Bacteria,4PPKV@976|Bacteroidetes,2G17B@200643|Bacteroidia,22WRN@171551|Porphyromonadaceae	976|Bacteroidetes	M	SusD family	NA	SusD-like_3,SusD_RagB
7.94897	-0.00670807	0.173568	-0.0386482	0.969171	0.985512	162632	165724	3092	-	TonB-dependent receptor P3	1235803.C825_01768	0	2053	COG1629@1|root,COG1629@2|Bacteria,COG4771@2|Bacteria,4NDXS@976|Bacteroidetes,2FKYX@200643|Bacteroidia,22XBC@171551|Porphyromonadaceae	976|Bacteroidetes	P	TonB dependent receptor	NA	CarbopepD_reg_2,Plug,TonB_dep_Rec
7.82746	0.0997566	0.171232	0.582581	0.560175	0.733971	165746	167743	1997	-	hypothetical protein	1235803.C825_01769	0	1377	COG3345@1|root,COG3345@2|Bacteria,4NHM7@976|Bacteroidetes,2FNUE@200643|Bacteroidia,22WN2@171551|Porphyromonadaceae	976|Bacteroidetes	G	alpha-galactosidase	NA	CBM_35
8.02542	0.0762573	0.172146	0.44298	0.65778	0.799403	167767	169971	2204	-	Alpha-galactosidase AgaA	1235803.C825_01770	0	1503	COG3345@1|root,COG3345@2|Bacteria,4NHAT@976|Bacteroidetes,2FM30@200643|Bacteroidia,22WS0@171551|Porphyromonadaceae	976|Bacteroidetes	G	Glycosyl hydrolase family 36 C-terminal domain	NA	Glyco_hydro_36C,Glyco_hydro_36N,Melibiase
8.01043	0.547999	0.180221	3.0407	0.00236032	0.0138743	170150	171370	1220	-	hypothetical protein	714943.Mucpa_6021	0.000237	49.7	2C6H2@1|root,33K98@2|Bacteria	2|Bacteria	NA	NA	NA	NA
3.07012	-5.93268	3.99837	-1.48378	0.137868	0.293957	171502	171693	191	+	hypothetical protein	NA	NA	NA	NA	NA	NA	NA	NA	NA
6.94173	-0.0686684	0.344367	-0.199405	0.841946	0.915569	171671	172477	806	-	hypothetical protein	1235803.C825_01773	3.16e-190	528	COG3279@1|root,COG3279@2|Bacteria,4NRFD@976|Bacteroidetes,2FM05@200643|Bacteroidia,22Y7Y@171551|Porphyromonadaceae	976|Bacteroidetes	KT	LytTr DNA-binding domain	NA	LytTR
8.10079	0.655957	0.20978	3.12688	0.00176673	0.0111043	172480	173229	749	-	hypothetical protein	1235803.C825_01774	4.51e-185	513	COG4758@1|root,COG4758@2|Bacteria,4NQRE@976|Bacteroidetes,2FMXH@200643|Bacteroidia,22YB9@171551|Porphyromonadaceae	976|Bacteroidetes	S	Cell wall-active antibiotics response 4TMS YvqF	NA	DUF2154
8.16006	0.307773	0.214588	1.43425	0.151502	0.315309	173635	174219	584	-	Inner membrane protein RclC	1235803.C825_01775	3.09e-133	378	COG3059@1|root,COG3059@2|Bacteria,4NG9V@976|Bacteroidetes,2FMSP@200643|Bacteroidia,22Y9K@171551|Porphyromonadaceae	976|Bacteroidetes	S	membrane	ykgB	DUF417
8.06777	0.24461	0.161897	1.5109	0.130814	0.284066	174397	175611	1214	-	GTP 3',8-cyclase	1235803.C825_01776	4.33e-302	822	COG0535@1|root,COG0535@2|Bacteria,4PA9R@976|Bacteroidetes,2FWDR@200643|Bacteroidia	976|Bacteroidetes	S	Radical SAM superfamily	NA	Fer4_14,Radical_SAM
8.28295	0.814219	0.134888	6.03625	1.57734e-09	6.75731e-08	175852	176697	845	+	HTH-type transcriptional activator RhaS	1235803.C825_01777	3.6e-207	572	COG2169@1|root,COG2169@2|Bacteria,4P21T@976|Bacteroidetes,2FR6F@200643|Bacteroidia	976|Bacteroidetes	K	transcriptional regulator (AraC family)	NA	HTH_18
7.64534	0.0336303	0.217045	0.154947	0.876863	0.935303	176996	177751	755	-	Fumarate reductase iron-sulfur subunit	1235803.C825_01778	1.02e-182	508	COG0479@1|root,COG0479@2|Bacteria,4NFR3@976|Bacteroidetes,2FP6Q@200643|Bacteroidia,22W4E@171551|Porphyromonadaceae	976|Bacteroidetes	C	succinate dehydrogenase	frdB	Fer2_3,Fer4_7,Fer4_8
7.77013	0.2036	0.14788	1.37679	0.168578	0.34014	177779	179722	1943	-	Fumarate reductase flavoprotein subunit	1235803.C825_01779	0	1303	COG1053@1|root,COG1053@2|Bacteria,4NFDU@976|Bacteroidetes,2FM67@200643|Bacteroidia,22WBE@171551|Porphyromonadaceae	976|Bacteroidetes	C	SdhA B are the catalytic subcomplex and can exhibit succinate dehydrogenase activity in the absence of SdhC D which are the membrane components and form cytochrome b556	sdhA	FAD_binding_2,Succ_DH_flav_C
7.52612	-0.483504	0.227972	-2.12089	0.0339312	0.107771	179756	180481	725	-	hypothetical protein	1235803.C825_01780	2.13e-170	476	2CAZH@1|root,2Z7RU@2|Bacteria,4NGM5@976|Bacteroidetes,2FM2S@200643|Bacteroidia,22WYG@171551|Porphyromonadaceae	976|Bacteroidetes	S	fumarate reductase	sdhC	Sdh_cyt
7.82191	0.521666	0.165903	3.1444	0.00166427	0.0105971	180720	182117	1397	+	hypothetical protein	1235803.C825_01781	0	927	COG0671@1|root,COG0671@2|Bacteria,4NKUR@976|Bacteroidetes,2FQBW@200643|Bacteroidia,22XJ4@171551|Porphyromonadaceae	976|Bacteroidetes	I	Acid phosphatase homologues	NA	OMP_b-brl,PAP2
7.8727	0.17353	0.192244	0.902654	0.366709	0.574326	182121	183944	1823	-	hypothetical protein	1235803.C825_01782	0	1222	COG4225@1|root,COG4225@2|Bacteria,4NF1N@976|Bacteroidetes,2G3HE@200643|Bacteroidia,22Z10@171551|Porphyromonadaceae	976|Bacteroidetes	S	Heparinase II/III-like protein	NA	DUF4962,Hepar_II_III
5.74642	0.622917	0.763173	0.816221	0.414374	0.618615	184089	185207	1118	+	IS110 family transposase ISAzo28	1235803.C825_05534	5.16e-271	741	COG3547@1|root,COG3547@2|Bacteria,4NMIB@976|Bacteroidetes,2G37Z@200643|Bacteroidia,22Z06@171551|Porphyromonadaceae	976|Bacteroidetes	L	Transposase, IS116 IS110 IS902 family	NA	DEDD_Tnp_IS110,Transposase_20
8.64432	0.909944	0.187662	4.84886	1.24174e-06	2.64548e-05	186398	186874	476	+	hypothetical protein	1235803.C825_01784	2.3e-115	330	COG3467@1|root,COG3467@2|Bacteria,4NPDK@976|Bacteroidetes,2G2MH@200643|Bacteroidia,22Y2U@171551|Porphyromonadaceae	976|Bacteroidetes	S	Pfam:Pyridox_oxidase	NA	Pyridox_ox_2
6.06254	0.536314	0.565908	0.947706	0.343279	0.549226	186895	187365	470	+	hypothetical protein	1235803.C825_01785	1.24e-118	338	2EBNH@1|root,335NR@2|Bacteria,4NWM9@976|Bacteroidetes	976|Bacteroidetes	NA	NA	NA	NA
7.15923	-0.193704	0.295238	-0.656093	0.511764	0.695734	187424	188323	899	+	hypothetical protein	1235803.C825_01786	7.95e-220	605	COG1045@1|root,COG1045@2|Bacteria,4NGZ7@976|Bacteroidetes,2FM9U@200643|Bacteroidia,22XAZ@171551|Porphyromonadaceae	976|Bacteroidetes	E	Serine acetyltransferase	cysE	Hexapep,SATase_N
7.67443	0.0652213	0.164438	0.396633	0.691638	0.821827	188349	189947	1598	+	Ribosomal RNA large subunit methyltransferase K/L	1235803.C825_01787	0	1021	COG0116@1|root,COG0116@2|Bacteria,4NFJM@976|Bacteroidetes,2FMNN@200643|Bacteroidia,22WIQ@171551|Porphyromonadaceae	976|Bacteroidetes	L	Belongs to the methyltransferase superfamily	rlmL	THUMP,UPF0020
7.951	0.260477	0.149897	1.7377	0.0822629	0.206332	189931	192147	2216	+	Prolyl tripeptidyl peptidase	1235803.C825_01788	0	1524	COG1506@1|root,COG1506@2|Bacteria,4NF7I@976|Bacteroidetes,2FMJD@200643|Bacteroidia,22W5C@171551|Porphyromonadaceae	976|Bacteroidetes	E	Peptidase, S9A B C family, catalytic domain protein	pepX2	DPPIV_N,Peptidase_S9
7.87821	0.165147	0.160363	1.02983	0.303089	0.506568	192276	193544	1268	+	Phosphoribosylamine--glycine ligase	1235803.C825_01789	4.75e-305	834	COG0151@1|root,COG0151@2|Bacteria,4NEUN@976|Bacteroidetes,2FN59@200643|Bacteroidia,22WGM@171551|Porphyromonadaceae	976|Bacteroidetes	F	Belongs to the GARS family	purD	GARS_A,GARS_C,GARS_N
7.29632	0.481362	0.268301	1.79411	0.0727957	0.186832	193697	194554	857	+	hypothetical protein	1235803.C825_01790	1.1e-181	510	2DQYE@1|root,339DJ@2|Bacteria,4NSHZ@976|Bacteroidetes,2FMS8@200643|Bacteroidia,22YYN@171551|Porphyromonadaceae	976|Bacteroidetes	S	Psort location CytoplasmicMembrane, score 10.00	NA	NA
5.38286	1.06948	1.11632	0.958043	0.338041	0.544424	194539	194988	449	+	Inner membrane protein YqaA	1235803.C825_01791	3.21e-104	301	COG1238@1|root,COG1238@2|Bacteria,4NQAX@976|Bacteroidetes,2FRY9@200643|Bacteroidia,22Y6N@171551|Porphyromonadaceae	976|Bacteroidetes	S	SNARE associated Golgi protein	NA	SNARE_assoc
7.10845	0.0735825	0.367016	0.200489	0.841099	0.915035	195004	195720	716	-	hypothetical protein	1235803.C825_01792	1.89e-167	468	2F6UR@1|root,33ZAV@2|Bacteria,4P40C@976|Bacteroidetes,2FT2S@200643|Bacteroidia	976|Bacteroidetes	S	Domain of unknown function (DUF5036)	NA	DUF5036
7.98179	0.204376	0.175694	1.16325	0.244728	0.439475	195769	197058	1289	-	Prolyl tri/tetrapeptidyl aminopeptidase	1235803.C825_01793	0	875	COG1073@1|root,COG1073@2|Bacteria,4NFCA@976|Bacteroidetes,2FP8B@200643|Bacteroidia,22XUE@171551|Porphyromonadaceae	976|Bacteroidetes	S	PS-10 peptidase S37	NA	Peptidase_S37
7.71787	-0.200666	0.298327	-0.672638	0.501178	0.685494	197520	198080	560	-	Epoxyqueuosine reductase	1235803.C825_01794	4.53e-96	289	COG1600@1|root,COG1600@2|Bacteria,4NFCJ@976|Bacteroidetes,2FPCB@200643|Bacteroidia,22W87@171551|Porphyromonadaceae	976|Bacteroidetes	C	Catalyzes the conversion of epoxyqueuosine (oQ) to queuosine (Q), which is a hypermodified base found in the wobble positions of tRNA(Asp), tRNA(Asn), tRNA(His) and tRNA(Tyr)	queG	DUF1730,Fer4_16
6.70626	0.22421	0.488795	0.458699	0.646451	0.792705	198129	198740	611	-	Peptidoglycan-N-acetylglucosamine deacetylase	1235803.C825_01795	4.94e-157	439	COG0726@1|root,COG0726@2|Bacteria,4NM7D@976|Bacteroidetes,2FMF7@200643|Bacteroidia,22XKK@171551|Porphyromonadaceae	976|Bacteroidetes	G	polysaccharide deacetylase	pgdA_1	Polysacc_deac_1
8.23857	0.333946	0.187047	1.78536	0.0742033	0.189579	198744	201962	3218	-	hypothetical protein	1235803.C825_01796	0	2153	COG0457@1|root,COG0697@1|root,COG0457@2|Bacteria,COG0697@2|Bacteria,4PKRH@976|Bacteroidetes,2G090@200643|Bacteroidia,23243@171551|Porphyromonadaceae	976|Bacteroidetes	EG	Protein of unknown function (DUF2723)	NA	DUF2723
8.44548	0.907759	0.215361	4.21506	2.49714e-05	0.000350976	202218	203486	1268	-	hypothetical protein	1235803.C825_01797	4.62e-305	852	COG1373@1|root,COG1373@2|Bacteria,4NED3@976|Bacteroidetes,2G31T@200643|Bacteroidia,22XCX@171551|Porphyromonadaceae	976|Bacteroidetes	S	AAA domain	NA	AAA_14,DUF4143
8.30406	0.880381	0.187446	4.69672	2.64378e-06	5.01509e-05	203782	204492	710	-	hypothetical protein	NA	NA	NA	NA	NA	NA	NA	NA	NA
4.12904	-6.99162	3.59841	-1.94298	0.0520188	0.144904	204640	204732	92	-	hypothetical protein	NA	NA	NA	NA	NA	NA	NA	NA	NA
6.23349	2.53476	0.490009	5.17289	2.30503e-07	5.90759e-06	204819	205163	344	-	hypothetical protein	1235803.C825_01800	2.17e-74	223	2C6KV@1|root,2ZDUB@2|Bacteria,4P7Z1@976|Bacteroidetes,2FZB7@200643|Bacteroidia	976|Bacteroidetes	NA	NA	NA	NA
7.96979	1.6921	0.233081	7.25969	3.8797e-13	3.10086e-11	205180	206292	1112	-	hypothetical protein	1235803.C825_01801	6.09e-278	758	COG3391@1|root,COG3391@2|Bacteria,4PPU3@976|Bacteroidetes,2G2FH@200643|Bacteroidia	976|Bacteroidetes	S	6-bladed beta-propeller	NA	DUF5128
5.15972	3.92641	3.07619	1.27639	0.201818	0.38474	206384	206614	230	-	hypothetical protein	1235803.C825_01802	2.06e-50	159	2DC7S@1|root,2ZD6S@2|Bacteria,4P76V@976|Bacteroidetes,2FZIP@200643|Bacteroidia	976|Bacteroidetes	S	NVEALA protein	NA	NVEALA
7.11205	1.4425	0.310545	4.64506	3.39979e-06	6.17148e-05	206634	207062	428	-	hypothetical protein	435590.BVU_0289	6.55e-07	53.1	2DENX@1|root,2ZNN1@2|Bacteria,4P861@976|Bacteroidetes,2FUAW@200643|Bacteroidia,4ARV0@815|Bacteroidaceae	976|Bacteroidetes	S	Domain of unknown function (DUF3244)	NA	DUF3244
8.5324	1.41458	0.179768	7.8689	3.57781e-15	4.16503e-13	207225	209057	1832	-	hypothetical protein	1235803.C825_01804	0	1062	COG0457@1|root,COG0457@2|Bacteria,4NRRJ@976|Bacteroidetes,2FPTP@200643|Bacteroidia	976|Bacteroidetes	K	Tetratricopeptide repeat protein	NA	TPR_12,TPR_8
8.35891	1.82178	0.25941	7.0228	2.17467e-12	1.59526e-10	209249	209527	278	+	hypothetical protein	1235803.C825_01805	2.25e-59	183	COG2865@1|root,COG2865@2|Bacteria	2|Bacteria	NA	NA	NA	AlbA_2,Fic,HATPase_c_4
8.40636	0.881828	0.188386	4.68096	2.8553e-06	5.29867e-05	209760	210647	887	-	hypothetical protein	1235803.C825_01806	2.47e-221	609	COG3177@1|root,COG3177@2|Bacteria,4NIG2@976|Bacteroidetes,2FQZJ@200643|Bacteroidia,231T4@171551|Porphyromonadaceae	976|Bacteroidetes	S	Fic/DOC family	NA	Fic
8.37074	0.428414	0.15055	2.84565	0.0044321	0.0224116	210922	213735	2813	+	hypothetical protein	1235803.C825_01807	0	1863	COG0612@1|root,COG0612@2|Bacteria,4NFY0@976|Bacteroidetes,2FMCE@200643|Bacteroidia,22WW4@171551|Porphyromonadaceae	976|Bacteroidetes	S	Belongs to the peptidase M16 family	NA	Peptidase_M16,Peptidase_M16_C
5.88116	0.378969	0.506233	0.748605	0.454095	0.653076	214061	215014	953	+	IS110 family transposase ISGka2	1235803.C825_05069	8.73e-233	640	COG3547@1|root,COG3547@2|Bacteria,4NJ8G@976|Bacteroidetes,2FRWC@200643|Bacteroidia,2320J@171551|Porphyromonadaceae	976|Bacteroidetes	L	Transposase	NA	DEDD_Tnp_IS110,Transposase_20
4.85642	0.254934	2.01731	0.126373	0.899436	0.947837	215011	215319	308	+	hypothetical protein	1235803.C825_05070	4.29e-64	196	COG3547@1|root,COG3547@2|Bacteria,4PB8R@976|Bacteroidetes,2FYNJ@200643|Bacteroidia	976|Bacteroidetes	L	Transposase (IS116 IS110 IS902 family)	NA	NA
8.1739	1.04981	0.196711	5.33682	9.45918e-08	2.73805e-06	215700	216731	1031	+	putative protein	1235803.C825_01810	2.55e-245	674	COG3177@1|root,COG3177@2|Bacteria,4NFBY@976|Bacteroidetes,2FRIW@200643|Bacteroidia,22WH3@171551|Porphyromonadaceae	976|Bacteroidetes	S	Fic/DOC family N-terminal	NA	Fic,Fic_N
8.0563	0.61468	0.139417	4.40894	1.03876e-05	0.000168053	216728	218482	1754	+	hypothetical protein	1235803.C825_01811	0	1033	COG4735@1|root,COG4735@2|Bacteria,4NF74@976|Bacteroidetes,2FM2A@200643|Bacteroidia,22WRJ@171551|Porphyromonadaceae	976|Bacteroidetes	S	Psort location	NA	NA
8.18553	0.255646	0.184392	1.38643	0.165617	0.336066	218700	221915	3215	+	TonB-dependent receptor SusC	1235803.C825_01812	0	2168	COG1629@1|root,COG1629@2|Bacteria,4NDXS@976|Bacteroidetes,2FKYX@200643|Bacteroidia,22W07@171551|Porphyromonadaceae	976|Bacteroidetes	P	TonB-dependent receptor plug domain	NA	CarbopepD_reg_2,Plug,STN,TonB_dep_Rec
7.79798	0.331545	0.197905	1.67528	0.0938799	0.22676	221937	223652	1715	+	SusD-like protein	1235803.C825_01813	0	1182	COG0446@1|root,COG0446@2|Bacteria,4NDYU@976|Bacteroidetes,2FM3Z@200643|Bacteroidia,22WYC@171551|Porphyromonadaceae	976|Bacteroidetes	S	SusD family	NA	SusD-like_3,SusD_RagB
7.89446	0.233998	0.174332	1.34225	0.179514	0.354723	223733	225973	2240	+	Beta-xylosidase	1235803.C825_01814	0	1482	COG1472@1|root,COG1472@2|Bacteria,4NE90@976|Bacteroidetes,2FMCU@200643|Bacteroidia,22WGY@171551|Porphyromonadaceae	976|Bacteroidetes	G	Fibronectin type III-like domain	NA	Fn3-like,Glyco_hydro_3,Glyco_hydro_3_C
7.3473	0.297335	0.223439	1.33072	0.183281	0.360569	225979	227244	1265	+	hypothetical protein	1235803.C825_01815	0	881	COG2730@1|root,COG2730@2|Bacteria,4NH83@976|Bacteroidetes,2FNQD@200643|Bacteroidia,22WJJ@171551|Porphyromonadaceae	976|Bacteroidetes	G	Cellulase (glycosyl hydrolase family 5)	NA	Cellulase
7.8728	0.38213	0.158755	2.40704	0.0160826	0.0612369	227249	229486	2237	+	Beta-glucosidase BoGH3A	1235803.C825_01816	0	1511	COG1472@1|root,COG1472@2|Bacteria,4NE90@976|Bacteroidetes,2FMCU@200643|Bacteroidia,22WMW@171551|Porphyromonadaceae	976|Bacteroidetes	G	hydrolase, family 3	bglB_4	Fn3-like,Glyco_hydro_3,Glyco_hydro_3_C
7.96601	0.0652691	0.174076	0.374947	0.7077	0.831811	229576	232053	2477	-	Outer membrane protein assembly factor BamB	1235803.C825_01817	0	1644	COG1409@1|root,COG1520@1|root,COG1409@2|Bacteria,COG1520@2|Bacteria,4NI0T@976|Bacteroidetes,2G2NV@200643|Bacteroidia,22ZNR@171551|Porphyromonadaceae	976|Bacteroidetes	S	PQQ enzyme repeat	NA	Metallophos,MetallophosN,PQQ_2,PQQ_3
5.45451	-0.114421	0.951808	-0.120214	0.904314	0.951208	232094	232507	413	-	hypothetical protein	1235803.C825_01818	6.25e-96	285	COG0708@1|root,COG0708@2|Bacteria,4NGD8@976|Bacteroidetes,2FR2B@200643|Bacteroidia	976|Bacteroidetes	L	Endonuclease/Exonuclease/phosphatase family	NA	Exo_endo_phos,Laminin_G_3
6.9885	0.691245	0.42777	1.61593	0.10611	0.246196	232513	233034	521	-	hypothetical protein	1235803.C825_01818	9.15e-120	347	COG0708@1|root,COG0708@2|Bacteria,4NGD8@976|Bacteroidetes,2FR2B@200643|Bacteroidia	976|Bacteroidetes	L	Endonuclease/Exonuclease/phosphatase family	NA	Exo_endo_phos,Laminin_G_3
8.22922	1.01321	0.187476	5.40446	6.50034e-08	1.96423e-06	233195	234982	1787	-	SusD-like protein P38	1235803.C825_01819	0	1214	COG0457@1|root,COG0457@2|Bacteria,4NDX0@976|Bacteroidetes,2FM6J@200643|Bacteroidia,22X0J@171551|Porphyromonadaceae	976|Bacteroidetes	S	SusD family	NA	SusD-like_3,SusD_RagB
8.39629	0.870326	0.157357	5.53088	3.18621e-08	1.02784e-06	235002	238466	3464	-	TonB-dependent receptor P3	1235803.C825_01820	0	2335	COG1629@1|root,COG1629@2|Bacteria,4NDXS@976|Bacteroidetes,2FM2D@200643|Bacteroidia	976|Bacteroidetes	P	TonB-linked outer membrane protein, SusC RagA family	NA	CarbopepD_reg_2,Plug,STN,TonB_dep_Rec
8.06697	1.42669	0.179229	7.96015	1.71831e-15	2.13989e-13	238590	239672	1082	-	hypothetical protein	1235803.C825_01821	6.56e-252	692	COG3712@1|root,COG3712@2|Bacteria,4NJBJ@976|Bacteroidetes,2FQUN@200643|Bacteroidia,22YHT@171551|Porphyromonadaceae	976|Bacteroidetes	PT	Domain of unknown function (DUF4974)	NA	DUF4974,FecR
8.49126	1.3891	0.232859	5.9654	2.44032e-09	9.97551e-08	239738	240286	548	-	hypothetical protein	1235803.C825_01822	2.21e-127	362	COG1595@1|root,COG1595@2|Bacteria,4NVCP@976|Bacteroidetes,2FRBB@200643|Bacteroidia	976|Bacteroidetes	K	RNA polymerase sigma-70 factor, ECF subfamily	NA	Sigma70_r2,Sigma70_r4_2
8.64832	0.811115	0.190042	4.26809	1.97154e-05	0.000290591	240919	241809	890	-	hypothetical protein	1235803.C825_01823	5.49e-205	568	COG1284@1|root,COG1284@2|Bacteria,4NG9F@976|Bacteroidetes,2FP2N@200643|Bacteroidia,22WWJ@171551|Porphyromonadaceae	976|Bacteroidetes	S	membrane	NA	DUF2179,YitT_membrane
7.67274	0.332506	0.23196	1.43347	0.151725	0.315651	241983	243125	1142	-	hypothetical protein	1235803.C825_01824	2.46e-298	811	COG3507@1|root,COG3507@2|Bacteria,4PKZY@976|Bacteroidetes,2G09G@200643|Bacteroidia,22WA2@171551|Porphyromonadaceae	976|Bacteroidetes	G	Glycosyl hydrolases family 43	NA	Glyco_hydro_43
7.29392	0.200404	0.309468	0.647575	0.51726	0.701187	243130	244014	884	-	hypothetical protein	1235803.C825_01825	3.79e-220	606	COG3622@1|root,COG3622@2|Bacteria,4NG0V@976|Bacteroidetes,2FSYZ@200643|Bacteroidia,22Z34@171551|Porphyromonadaceae	976|Bacteroidetes	G	Xylose isomerase-like TIM barrel	NA	AP_endonuc_2
7.81132	0.690703	0.205403	3.36267	0.000771935	0.00573733	244066	245274	1208	-	hypothetical protein	1235803.C825_01826	1.4e-306	833	COG1073@1|root,COG1073@2|Bacteria,4P0DH@976|Bacteroidetes,2FQKF@200643|Bacteroidia	976|Bacteroidetes	S	Abhydrolase family	NA	Abhydrolase_7
8.333	0.5048	0.189664	2.66155	0.00777827	0.0357227	245473	248589	3116	-	hypothetical protein	1235803.C825_01827	0	2150	COG3250@1|root,COG3250@2|Bacteria,4NIBS@976|Bacteroidetes,2FPZ2@200643|Bacteroidia,22ZBT@171551|Porphyromonadaceae	976|Bacteroidetes	G	alpha-L-rhamnosidase	NA	Glyco_hydro_106
8.0749	0.342672	0.159458	2.14898	0.031636	0.101892	248701	251358	2657	-	Alpha-L-rhamnosidase	1235803.C825_01828	0	1852	COG3250@1|root,COG3250@2|Bacteria,4PKXA@976|Bacteroidetes,2FP7W@200643|Bacteroidia,22ZWK@171551|Porphyromonadaceae	976|Bacteroidetes	G	Bacterial alpha-L-rhamnosidase C-terminal domain	NA	Bac_rhamnosid,Bac_rhamnosid6H,Bac_rhamnosid_C,Bac_rhamnosid_N
8.15556	0.605383	0.14448	4.19008	2.78861e-05	0.000384871	251367	254039	2672	-	Alpha-L-rhamnosidase	1235803.C825_01829	0	1873	COG3387@1|root,COG3387@2|Bacteria,4PKWH@976|Bacteroidetes,2G06C@200643|Bacteroidia,23277@171551|Porphyromonadaceae	976|Bacteroidetes	G	Bacterial alpha-L-rhamnosidase C-terminal domain	NA	Bac_rhamnosid,Bac_rhamnosid6H,Bac_rhamnosid_C,Bac_rhamnosid_N
8.26866	1.01859	0.136796	7.44603	9.61927e-14	8.5852e-12	254091	256643	2552	-	hypothetical protein	1235803.C825_01830	0	1785	COG3408@1|root,COG3408@2|Bacteria,4NJY8@976|Bacteroidetes,2G2N9@200643|Bacteroidia	976|Bacteroidetes	G	Bacterial alpha-L-rhamnosidase 6 hairpin glycosidase domain	NA	Bac_rhamnosid6H,Bac_rhamnosid_C,Bac_rhamnosid_N
8.2399	0.896209	0.164631	5.44374	5.2172e-08	1.61492e-06	256735	259635	2900	-	Putative beta-glucuronidase	1235803.C825_01831	0	2041	COG3250@1|root,COG3250@2|Bacteria,4NFE8@976|Bacteroidetes,2FPEC@200643|Bacteroidia	976|Bacteroidetes	G	Glycosyl hydrolase family 2, sugar binding domain protein	NA	Glyco_hydro_106
7.86978	0.567903	0.175302	3.23956	0.00119714	0.00805361	259712	261256	1544	-	hypothetical protein	1235803.C825_01832	0	1033	COG0702@1|root,COG0702@2|Bacteria,4NEDB@976|Bacteroidetes,2FPB4@200643|Bacteroidia	976|Bacteroidetes	GM	COG NOG26302 non supervised orthologous group	NA	SusD-like_3,SusD_RagB
8.51382	0.689035	0.199778	3.44901	0.000562648	0.00438571	261270	264323	3053	-	TonB-dependent receptor P3	1235803.C825_01833	0	2050	COG1629@1|root,COG1629@2|Bacteria,4NDXS@976|Bacteroidetes,2FKYX@200643|Bacteroidia,22W07@171551|Porphyromonadaceae	976|Bacteroidetes	P	TonB-dependent receptor plug domain	NA	CarbopepD_reg_2,Plug,STN,TonB_dep_Rec
8.48067	0.583864	0.183696	3.17843	0.00148073	0.00958804	264989	268159	3170	-	Beta-barrel assembly-enhancing protease	1235803.C825_01834	0	2157	COG0457@1|root,COG0457@2|Bacteria,4NIBU@976|Bacteroidetes,2FP1P@200643|Bacteroidia,231U2@171551|Porphyromonadaceae	976|Bacteroidetes	S	Domain of unknown function (DUF5107)	NA	DUF5107,TPR_16,TPR_8
8.42158	0.430075	0.163994	2.62251	0.00872856	0.0388864	268406	271396	2990	-	hypothetical protein	1235803.C825_01835	0	2056	28IXK@1|root,2Z8VG@2|Bacteria,4NHBH@976|Bacteroidetes,2FMQA@200643|Bacteroidia	976|Bacteroidetes	NA	NA	NA	NA
8.13778	0.861785	0.199806	4.31311	1.60977e-05	0.000245907	271656	272915	1259	-	hypothetical protein	1235803.C825_01836	0	868	COG4225@1|root,COG4225@2|Bacteria,4NG9E@976|Bacteroidetes,2G0S7@200643|Bacteroidia	976|Bacteroidetes	S	Domain of unknown function (DUF4861)	NA	DUF4861
7.68003	0.446805	0.269276	1.65928	0.0970596	0.23162	272981	274150	1169	-	hypothetical protein	1235803.C825_01837	6.59e-303	823	COG4225@1|root,COG4225@2|Bacteria,4NHK7@976|Bacteroidetes,2FPVZ@200643|Bacteroidia,22XE1@171551|Porphyromonadaceae	976|Bacteroidetes	S	Glycosyl Hydrolase Family 88	NA	Glyco_hydro_88
7.95353	0.883836	0.17073	5.17682	2.25698e-07	5.83871e-06	274172	275953	1781	-	hypothetical protein	1235803.C825_01838	0	1220	2DBT1@1|root,2ZAV2@2|Bacteria,4NK57@976|Bacteroidetes,2FWWY@200643|Bacteroidia	976|Bacteroidetes	NA	NA	NA	NA
7.86688	0.57595	0.170948	3.36916	0.000753972	0.00563113	276036	277532	1496	-	SusD-like protein P2	1235803.C825_01839	0	1020	COG0561@1|root,COG0561@2|Bacteria,4PN5Z@976|Bacteroidetes,2G195@200643|Bacteroidia	976|Bacteroidetes	S	SusD family	NA	SusD-like_3,SusD_RagB
8.26726	0.420761	0.149669	2.81128	0.0049345	0.0243991	277548	280685	3137	-	TonB-dependent receptor P3	1235803.C825_01840	0	2062	COG1629@1|root,COG1629@2|Bacteria,4NDXS@976|Bacteroidetes,2FKYX@200643|Bacteroidia	976|Bacteroidetes	P	TonB-linked outer membrane protein, SusC RagA family	NA	CarbopepD_reg_2,Plug,STN,TonB_dep_Rec
7.61567	0.101796	0.238201	0.427353	0.669122	0.807873	280905	282179	1274	-	hypothetical protein	1235803.C825_01841	0	868	COG2755@1|root,COG2755@2|Bacteria,4NGSE@976|Bacteroidetes,2FS41@200643|Bacteroidia,23170@171551|Porphyromonadaceae	976|Bacteroidetes	E	GDSL-like Lipase/Acylhydrolase family	NA	Lipase_GDSL_2
8.0796	0.784909	0.16465	4.76714	1.86857e-06	3.70599e-05	282182	283900	1718	-	Beta-N-acetylglucosaminidase/beta-glucosidase	1235803.C825_01842	0	1150	COG1472@1|root,COG1472@2|Bacteria,4NET8@976|Bacteroidetes,2FN0V@200643|Bacteroidia,22WIJ@171551|Porphyromonadaceae	976|Bacteroidetes	G	hydrolase, family 3	NA	Beta-lactamase,Glyco_hydro_3,Glyco_hydro_3_C
8.42568	0.542437	0.143818	3.77168	0.000162153	0.00164768	284169	288239	4070	+	Sensor histidine kinase RcsC	1235803.C825_01843	0	2591	COG0642@1|root,COG0745@1|root,COG3292@1|root,COG0745@2|Bacteria,COG2205@2|Bacteria,COG3292@2|Bacteria,4NDXU@976|Bacteroidetes,2FM2N@200643|Bacteroidia,22W84@171551|Porphyromonadaceae	976|Bacteroidetes	T	histidine kinase DNA gyrase B	NA	HATPase_c,HTH_18,HisKA,Reg_prop,Response_reg,Y_Y_Y
8.16147	0.395902	0.15968	2.47934	0.0131624	0.0528768	288521	290692	2171	+	hypothetical protein	1235803.C825_01844	0	1385	COG3420@1|root,COG3420@2|Bacteria,4PMG9@976|Bacteroidetes,2FQGR@200643|Bacteroidia	976|Bacteroidetes	P	Right handed beta helix region	NA	Beta_helix
7.96159	0.287823	0.167263	1.72079	0.0852894	0.211741	290730	292484	1754	+	hypothetical protein	1235803.C825_01845	0	1219	28K0Y@1|root,2Z9QT@2|Bacteria,4NGDJ@976|Bacteroidetes,2FP9X@200643|Bacteroidia	976|Bacteroidetes	NA	NA	NA	NA
8.25876	0.495295	0.155578	3.18358	0.00145466	0.00945354	292622	295453	2831	-	hypothetical protein	1235803.C825_01846	0	1945	COG1434@1|root,COG1470@1|root,COG1434@2|Bacteria,COG1470@2|Bacteria,4NE96@976|Bacteroidetes,2FR8X@200643|Bacteroidia,22ZBD@171551|Porphyromonadaceae	976|Bacteroidetes	S	NPCBM/NEW2 domain	NA	NPCBM
8.23493	0.715071	0.159519	4.48268	7.37124e-06	0.000124915	295546	298005	2459	-	hypothetical protein	1235803.C825_01847	0	1735	COG3537@1|root,COG3537@2|Bacteria,4NDYB@976|Bacteroidetes,2FMMF@200643|Bacteroidia,22XE8@171551|Porphyromonadaceae	976|Bacteroidetes	G	Glycosyl hydrolase family 92	NA	Glyco_hydro_92
7.94775	0.941793	0.271478	3.46913	0.000522144	0.00413809	298031	298306	275	-	hypothetical protein	1122931.AUAE01000007_gene1161	3.95e-20	90.9	COG3537@1|root,COG3537@2|Bacteria,4NDYB@976|Bacteroidetes,2FMMF@200643|Bacteroidia,22XE8@171551|Porphyromonadaceae	976|Bacteroidetes	G	Glycosyl hydrolase family 92	NA	Glyco_hydro_92
8.53102	0.680677	0.147628	4.61076	4.012e-06	7.23339e-05	298743	300701	1958	-	Retaining alpha-galactosidase	1235803.C825_01849	0	1333	COG1082@1|root,COG1082@2|Bacteria,4NEWC@976|Bacteroidetes,2FQVH@200643|Bacteroidia,22Z2Y@171551|Porphyromonadaceae	976|Bacteroidetes	G	Glycosyl-hydrolase 97 N-terminal	NA	GH97_C,GH97_N,Glyco_hydro_97
8.08044	0.533146	0.158661	3.36028	0.000778624	0.00575108	301012	302589	1577	-	hypothetical protein	1235803.C825_01850	0	1074	COG5520@1|root,COG5520@2|Bacteria,4NEG7@976|Bacteroidetes,2FMDC@200643|Bacteroidia,22WKT@171551|Porphyromonadaceae	976|Bacteroidetes	M	O-Glycosyl hydrolase family 30	NA	Glyco_hydr_30_2,Glyco_hydro_30C
7.93882	0.779349	0.152804	5.10032	3.39086e-07	8.25365e-06	302601	304235	1634	-	SusD-like protein P38	1235803.C825_01851	0	1096	COG1435@1|root,COG1435@2|Bacteria,4NFWU@976|Bacteroidetes,2FNY3@200643|Bacteroidia	976|Bacteroidetes	F	SusD family	NA	SusD-like_3,SusD_RagB
8.4314	0.958264	0.166174	5.76664	8.08694e-09	2.98659e-07	304247	307567	3320	-	TonB-dependent receptor P3	1235803.C825_01852	0	2209	COG1629@1|root,COG4771@2|Bacteria,4P1Z5@976|Bacteroidetes,2FW4E@200643|Bacteroidia	976|Bacteroidetes	P	TonB-linked outer membrane protein, SusC RagA family	NA	CarbopepD_reg_2,Plug,TonB_dep_Rec
8.21172	1.19214	0.199342	5.98035	2.22662e-09	9.17195e-08	307813	308799	986	-	hypothetical protein	1235803.C825_01853	1.11e-236	650	COG3712@1|root,COG3712@2|Bacteria,4NNTM@976|Bacteroidetes,2FQW4@200643|Bacteroidia,22Y0G@171551|Porphyromonadaceae	976|Bacteroidetes	PT	Domain of unknown function (DUF4974)	NA	DUF4974,FecR
7.81914	1.42425	0.241195	5.90498	3.52695e-09	1.38874e-07	308940	309500	560	-	RNA polymerase sigma-H factor	1235803.C825_01854	1.43e-125	358	COG1595@1|root,COG1595@2|Bacteria,4NQRB@976|Bacteroidetes,2G347@200643|Bacteroidia	976|Bacteroidetes	K	Bacterial regulatory proteins, luxR family	NA	Sigma70_r2,Sigma70_r4_2
8.91547	1.37713	0.227399	6.05602	1.39532e-09	6.07473e-08	309677	310543	866	-	hypothetical protein	1235803.C825_01855	1.38e-194	541	2997N@1|root,2ZWAY@2|Bacteria,4P7F4@976|Bacteroidetes	976|Bacteroidetes	NA	NA	NA	NA
8.37548	0.942714	0.187321	5.03262	4.83821e-07	1.14135e-05	311227	312462	1235	-	hypothetical protein	1235803.C825_01856	1.13e-305	850	COG4409@1|root,COG4409@2|Bacteria,4NKEW@976|Bacteroidetes,2FRFG@200643|Bacteroidia	976|Bacteroidetes	G	BNR repeat-like domain	NA	BNR_2
7.91475	0.609379	0.163491	3.7273	0.000193545	0.00191182	312590	313828	1238	-	hypothetical protein	1235803.C825_01857	0	867	COG4409@1|root,COG4409@2|Bacteria,4P27R@976|Bacteroidetes,2G2FP@200643|Bacteroidia	976|Bacteroidetes	G	BNR repeat-like domain	NA	BNR_2
7.9369	0.589835	0.185034	3.18772	0.00143399	0.00935894	313878	315575	1697	-	SusD-like protein P25	1235803.C825_01858	0	1177	COG3193@1|root,COG3193@2|Bacteria,4PN18@976|Bacteroidetes,2G0NT@200643|Bacteroidia	976|Bacteroidetes	P	Pfam:SusD	NA	SusD-like_3,SusD_RagB
8.36224	0.975898	0.159256	6.12784	8.90803e-10	4.11228e-08	315581	319015	3434	-	TonB-dependent receptor P3	1235803.C825_01859	0	2291	COG4206@1|root,COG4206@2|Bacteria,4P258@976|Bacteroidetes,2FW53@200643|Bacteroidia,22WRC@171551|Porphyromonadaceae	976|Bacteroidetes	P	CarboxypepD_reg-like domain	NA	CarbopepD_reg_2,Plug,TonB_dep_Rec
7.8762	1.00259	0.192542	5.20711	1.91805e-07	5.05968e-06	319145	320131	986	-	hypothetical protein	1235803.C825_01860	3.71e-235	647	COG3712@1|root,COG3712@2|Bacteria,4NJY6@976|Bacteroidetes,2G303@200643|Bacteroidia,22XZK@171551|Porphyromonadaceae	976|Bacteroidetes	PT	Domain of unknown function (DUF4974)	NA	DUF4974,FecR
7.36358	0.992444	0.274255	3.61869	0.000296099	0.00267388	320204	320788	584	-	ECF RNA polymerase sigma-E factor	1235803.C825_01861	3.35e-137	388	COG1595@1|root,COG1595@2|Bacteria,4NS12@976|Bacteroidetes,2FQ76@200643|Bacteroidia,22YD2@171551|Porphyromonadaceae	976|Bacteroidetes	K	RNA polymerase sigma-70 factor	NA	Sigma70_r2,Sigma70_r4_2
7.0926	0.325153	0.279716	1.16244	0.245057	0.439777	320957	321808	851	-	hypothetical protein	1235803.C825_01862	1.73e-215	593	COG1082@1|root,COG1082@2|Bacteria,4NJJZ@976|Bacteroidetes,2FQWU@200643|Bacteroidia,22WTW@171551|Porphyromonadaceae	976|Bacteroidetes	G	Xylose isomerase-like TIM barrel	NA	AP_endonuc_2
7.6925	0.0494268	0.174772	0.282807	0.777325	0.880595	321825	323339	1514	-	Inositol 2-dehydrogenase/D-chiro-inositol 3-dehydrogenase	1235803.C825_01863	0	1071	COG0673@1|root,COG0673@2|Bacteria,4NEN5@976|Bacteroidetes,2FQ0Q@200643|Bacteroidia,22Z6K@171551|Porphyromonadaceae	976|Bacteroidetes	S	Oxidoreductase family, NAD-binding Rossmann fold	NA	GFO_IDH_MocA,GFO_IDH_MocA_C,TAT_signal
7.69141	0.137741	0.202452	0.680366	0.496272	0.683931	323352	324992	1640	-	hypothetical protein	1235803.C825_01864	0	1150	COG4198@1|root,COG4198@2|Bacteria,4NEAX@976|Bacteroidetes,2G3H9@200643|Bacteroidia,22YH5@171551|Porphyromonadaceae	976|Bacteroidetes	S	Susd and RagB outer membrane lipoprotein	NA	SusD-like
8.28637	0.597593	0.170979	3.49513	0.000473823	0.00382703	325023	328439	3416	-	TonB-dependent receptor P26	1235803.C825_01865	0	2266	COG4206@1|root,COG4206@2|Bacteria,4NZWU@976|Bacteroidetes,2G065@200643|Bacteroidia,22WB2@171551|Porphyromonadaceae	976|Bacteroidetes	P	Carboxypeptidase regulatory-like domain	NA	CarbopepD_reg_2,Plug,STN,TonB_dep_Rec
8.06452	1.26829	0.152922	8.29372	1.09763e-16	1.83681e-14	328602	329696	1094	-	hypothetical protein	1235803.C825_01866	4.51e-261	715	COG3712@1|root,COG3712@2|Bacteria,4NJBJ@976|Bacteroidetes,2FQUN@200643|Bacteroidia	976|Bacteroidetes	PT	Sigma factor regulatory protein, FecR PupR family	NA	DUF4974,FecR
7.22317	0.568393	0.245334	2.31681	0.020514	0.0732838	329804	330358	554	-	hypothetical protein	1235803.C825_01867	6.07e-126	358	COG1595@1|root,COG1595@2|Bacteria,4NVCP@976|Bacteroidetes,2FRBB@200643|Bacteroidia	976|Bacteroidetes	K	RNA polymerase sigma-70 factor, ECF subfamily	NA	Sigma70_r2,Sigma70_r4_2
7.34841	0.514483	0.243435	2.11343	0.0345637	0.108876	330452	331021	569	-	hypothetical protein	1235803.C825_01868	1.17e-130	371	COG3646@1|root,COG3646@2|Bacteria,4NMUC@976|Bacteroidetes,2FRZU@200643|Bacteroidia,22YAE@171551|Porphyromonadaceae	976|Bacteroidetes	S	ORF6N domain	NA	ORF6N
7.81832	0.0970769	0.179663	0.540327	0.588971	0.75327	331252	332544	1292	-	Tyrosine--tRNA ligase	1235803.C825_01870	5.85e-305	847	COG0162@1|root,COG0162@2|Bacteria,4NF19@976|Bacteroidetes,2FN0B@200643|Bacteroidia,22VXJ@171551|Porphyromonadaceae	976|Bacteroidetes	J	Catalyzes the attachment of tyrosine to tRNA(Tyr) in a two-step reaction tyrosine is first activated by ATP to form Tyr- AMP and then transferred to the acceptor end of tRNA(Tyr)	tyrS	S4,tRNA-synt_1b
8.12548	0.322792	0.78919	0.409016	0.682528	0.81638	332733	332837	104	-	hypothetical protein	NA	NA	NA	NA	NA	NA	NA	NA	NA
7.86872	0.678268	0.464148	1.46132	0.143928	0.302487	333056	333382	326	+	hypothetical protein	NA	NA	NA	NA	NA	NA	NA	NA	NA
7.72322	0.774727	0.197728	3.91814	8.92361e-05	0.0010056	333626	334315	689	-	D-aminoacyl-tRNA deacylase	1235803.C825_01873	6.13e-164	458	COG0084@1|root,COG0084@2|Bacteria,4NSGW@976|Bacteroidetes,2FQ90@200643|Bacteroidia,22Y9I@171551|Porphyromonadaceae	976|Bacteroidetes	L	hydrolase, TatD family	NA	TatD_DNase
1.62237	-4.48503	4.00497	-1.11987	0.26277	0.46045	334400	334621	221	-	Putative membrane protein insertion efficiency factor	1235803.C825_01874	2.37e-50	159	COG0759@1|root,COG0759@2|Bacteria,4NV1N@976|Bacteroidetes,2FTU6@200643|Bacteroidia,22YS5@171551|Porphyromonadaceae	976|Bacteroidetes	S	Could be involved in insertion of integral membrane proteins into the membrane	yidD	Haemolytic
3.99234	0.229647	2.44037	0.0941036	0.925027	0.961848	334621	335007	386	-	Ribonuclease P protein component	1235803.C825_01875	6.12e-83	245	COG0594@1|root,COG0594@2|Bacteria,4NUMM@976|Bacteroidetes,2FUKM@200643|Bacteroidia,22YNG@171551|Porphyromonadaceae	976|Bacteroidetes	J	RNaseP catalyzes the removal of the 5'-leader sequence from pre-tRNA to produce the mature 5'-terminus. It can also cleave other RNA substrates such as 4.5S RNA. The protein component plays an auxiliary but essential role in vivo by binding to the 5'-leader sequence and broadening the substrate specificity of the ribozyme	rnpA	Ribonuclease_P
6.48397	-0.67592	0.393413	-1.71809	0.0857797	0.212367	334997	335770	773	-	hypothetical protein	1235803.C825_01876	1.62e-182	508	COG1587@1|root,COG1587@2|Bacteria,4NEQ3@976|Bacteroidetes,2FMX9@200643|Bacteroidia,22W2D@171551|Porphyromonadaceae	976|Bacteroidetes	H	Uroporphyrinogen-III synthase	hemD	HEM4
6.87162	1.43642	0.282209	5.08993	3.58189e-07	8.67919e-06	335761	336483	722	-	hypothetical protein	1235803.C825_01877	9.37e-169	471	2CEK0@1|root,321UV@2|Bacteria,4NUC9@976|Bacteroidetes,2FQ1Y@200643|Bacteroidia,22YU9@171551|Porphyromonadaceae	976|Bacteroidetes	S	Domain of unknown function (DUF4271)	NA	DUF4271
7.63278	0.613303	0.240157	2.55376	0.0106566	0.0452547	336527	337876	1349	-	Dihydrolipoyl dehydrogenase	1235803.C825_01878	0	874	COG1249@1|root,COG1249@2|Bacteria,4NDVC@976|Bacteroidetes,2FM8Y@200643|Bacteroidia,22WU2@171551|Porphyromonadaceae	976|Bacteroidetes	C	Dihydrolipoyl dehydrogenase	lpdA	Pyr_redox_2,Pyr_redox_dim
4.62739	1.80933	2.08103	0.86944	0.384607	0.592472	337887	338273	386	-	hypothetical protein	NA	NA	NA	NA	NA	NA	NA	NA	NA
5.2971	1.67821	1.18415	1.41723	0.156416	0.322193	338270	338692	422	-	hypothetical protein	1235803.C825_01880	3.16e-93	272	2EGMM@1|root,33ADT@2|Bacteria,4NUZ1@976|Bacteroidetes,2FVFQ@200643|Bacteroidia,2314F@171551|Porphyromonadaceae	976|Bacteroidetes	S	Bacterial PH domain	NA	bPH_4
8.85557	1.90149	0.282399	6.73332	1.6583e-11	1.03258e-09	338694	339077	383	-	hypothetical protein	NA	NA	NA	NA	NA	NA	NA	NA	NA
8.62791	1.20728	0.214094	5.63905	1.70996e-08	5.90762e-07	339885	341342	1457	-	hypothetical protein	1235803.C825_01882	0	1032	COG5434@1|root,COG5434@2|Bacteria,4NIEA@976|Bacteroidetes,2FMVC@200643|Bacteroidia	976|Bacteroidetes	M	Right handed beta helix region	NA	Beta_helix
7.79765	0.435728	0.179767	2.42385	0.015357	0.0592485	341433	343073	1640	-	hypothetical protein	1235803.C825_01883	0	1114	COG1435@1|root,COG1435@2|Bacteria,4NE0A@976|Bacteroidetes,2FM03@200643|Bacteroidia,22WUB@171551|Porphyromonadaceae	976|Bacteroidetes	F	SusD family	NA	SusD-like_3,SusD_RagB
8.09845	0.68353	0.17463	3.91416	9.07185e-05	0.00101844	343085	345847	2762	-	TonB-dependent receptor P3	1235803.C825_01884	0	1830	COG1629@1|root,COG4771@2|Bacteria,4NFFW@976|Bacteroidetes,2FMGS@200643|Bacteroidia,22Z97@171551|Porphyromonadaceae	976|Bacteroidetes	P	TonB dependent receptor	NA	Plug,TonB_dep_Rec
7.75389	0.335928	0.160244	2.09635	0.0360512	0.112045	345876	347636	1760	-	hypothetical protein	1235803.C825_01885	0	1233	COG1435@1|root,COG1435@2|Bacteria,4P1ZS@976|Bacteroidetes,2G099@200643|Bacteroidia,22ZCC@171551|Porphyromonadaceae	976|Bacteroidetes	F	SusD family	NA	SusD-like_3,SusD_RagB
8.31147	0.62927	0.199639	3.15204	0.00162134	0.0103484	347650	350859	3209	-	TonB-dependent receptor P26	1235803.C825_01886	0	2160	COG4206@1|root,COG4206@2|Bacteria,4P258@976|Bacteroidetes,2FWW6@200643|Bacteroidia,22W8X@171551|Porphyromonadaceae	976|Bacteroidetes	H	CarboxypepD_reg-like domain	NA	CarbopepD_reg_2,Plug
8.5049	0.956492	0.183377	5.21599	1.82836e-07	4.84696e-06	351184	355128	3944	+	Sensor histidine kinase RcsC	1235803.C825_01887	0	2518	COG0642@1|root,COG0745@1|root,COG3292@1|root,COG0745@2|Bacteria,COG2205@2|Bacteria,COG3292@2|Bacteria,4NITX@976|Bacteroidetes,2FM2F@200643|Bacteroidia,22X39@171551|Porphyromonadaceae	976|Bacteroidetes	T	helix_turn_helix, arabinose operon control protein	NA	HATPase_c,HTH_18,HisKA,Reg_prop,Response_reg,Y_Y_Y
7.61303	0.825356	0.239181	3.45076	0.000559001	0.00437	355217	355912	695	-	hypothetical protein	1235803.C825_01888	2.91e-163	457	28P2C@1|root,32W2C@2|Bacteria,4NSN6@976|Bacteroidetes,2FSPW@200643|Bacteroidia,2318Y@171551|Porphyromonadaceae	976|Bacteroidetes	NA	NA	NA	NA
7.98923	0.111156	0.137399	0.809003	0.418513	0.621848	356116	357690	1574	+	L-aspartate oxidase	1235803.C825_01889	0	1047	COG0029@1|root,COG0029@2|Bacteria,4NGUE@976|Bacteroidetes,2FNMT@200643|Bacteroidia,22WRX@171551|Porphyromonadaceae	976|Bacteroidetes	H	Catalyzes the oxidation of L-aspartate to iminoaspartate	nadB	FAD_binding_2,Succ_DH_flav_C
8.03749	0.998824	0.19228	5.19464	2.05115e-07	5.38426e-06	357822	358763	941	+	hypothetical protein	1235803.C825_01890	3.81e-225	620	COG3712@1|root,COG3712@2|Bacteria,4NKTC@976|Bacteroidetes,2FMS6@200643|Bacteroidia,2308R@171551|Porphyromonadaceae	976|Bacteroidetes	PT	Domain of unknown function (DUF4974)	NA	DUF4974,FecR
8.36582	1.00256	0.162297	6.17729	6.52105e-10	3.09028e-08	358902	362294	3392	+	TonB-dependent receptor P3	1235803.C825_01891	0	2196	COG4206@1|root,COG4206@2|Bacteria,4P258@976|Bacteroidetes,2FWW6@200643|Bacteroidia	976|Bacteroidetes	H	TonB-linked outer membrane protein, SusC RagA family	NA	CarbopepD_reg_2,Plug,TonB_dep_Rec
7.77398	0.730934	0.176788	4.13453	3.55683e-05	0.000477364	362308	363918	1610	+	SusD-like protein P2	1235803.C825_01892	0	1096	COG1435@1|root,COG1435@2|Bacteria,4NE0A@976|Bacteroidetes,2FN01@200643|Bacteroidia	976|Bacteroidetes	F	SusD family	NA	SusD-like_3,SusD_RagB
8.21322	0.787796	0.184977	4.25887	2.0546e-05	0.000300612	363928	366270	2342	+	hypothetical protein	1235803.C825_01893	0	1597	COG3250@1|root,COG3250@2|Bacteria,4P1Y2@976|Bacteroidetes	976|Bacteroidetes	G	alpha-L-rhamnosidase	NA	Glyco_hydro_106
7.56351	1.12648	0.28279	3.98346	6.79195e-05	0.000817323	366430	367278	848	+	hypothetical protein	1235803.C825_01894	4.06e-209	577	COG2755@1|root,COG2755@2|Bacteria,4NMZY@976|Bacteroidetes,2FM4F@200643|Bacteroidia	976|Bacteroidetes	E	GDSL-like Lipase/Acylhydrolase	NA	Lipase_GDSL_2
8.10786	0.273482	0.177502	1.54072	0.123384	0.272322	367316	370597	3281	+	hypothetical protein	1235803.C825_01895	0	2282	COG3250@1|root,COG3250@2|Bacteria,4NFE8@976|Bacteroidetes,2FPEC@200643|Bacteroidia,22ZJX@171551|Porphyromonadaceae	976|Bacteroidetes	G	alpha-L-rhamnosidase	NA	Glyco_hydro_106,Glyco_hydro_2_N
7.83372	0.45039	0.148823	3.02636	0.00247521	0.0143761	370612	372639	2027	+	hypothetical protein	1235803.C825_01896	0	1415	COG3533@1|root,COG3533@2|Bacteria,4NG7T@976|Bacteroidetes,2FPXE@200643|Bacteroidia	976|Bacteroidetes	S	protein conserved in bacteria	NA	Glyco_hydro_127
7.93272	0.745984	0.438312	1.70195	0.0887651	0.217845	372704	373252	548	-	hypothetical protein	1235803.C825_01897	4.8e-122	348	COG1595@1|root,COG1595@2|Bacteria,4NQZK@976|Bacteroidetes,2FM20@200643|Bacteroidia	976|Bacteroidetes	K	RNA polymerase sigma-70 factor	NA	Sigma70_r2,Sigma70_r4_2
8.48786	0.740893	0.17003	4.35743	1.31597e-05	0.000208492	373545	377588	4043	-	Sensor histidine kinase RcsC	1235803.C825_01898	0	2673	COG0642@1|root,COG0745@1|root,COG3292@1|root,COG0745@2|Bacteria,COG2205@2|Bacteria,COG3292@2|Bacteria,4P04W@976|Bacteroidetes,2FP7F@200643|Bacteroidia,22ZEJ@171551|Porphyromonadaceae	976|Bacteroidetes	T	helix_turn_helix, arabinose operon control protein	NA	HATPase_c,HTH_18,HisKA,Reg_prop,Response_reg,Y_Y_Y
8.28897	0.38929	0.167868	2.31903	0.0203935	0.0729018	377872	381108	3236	+	TonB-dependent receptor SusC	1235803.C825_01899	0	2186	COG1629@1|root,COG4771@2|Bacteria,4P1Z5@976|Bacteroidetes,2FW4E@200643|Bacteroidia	976|Bacteroidetes	P	TonB-linked outer membrane protein, SusC RagA family	NA	CarbopepD_reg_2,Plug,TonB_dep_Rec
2.12085	3.87695	3.7809	1.0254	0.305173	0.508938	381215	382168	953	+	IS110 family transposase ISGka2	1235803.C825_05069	8.73e-233	640	COG3547@1|root,COG3547@2|Bacteria,4NJ8G@976|Bacteroidetes,2FRWC@200643|Bacteroidia,2320J@171551|Porphyromonadaceae	976|Bacteroidetes	L	Transposase	NA	DEDD_Tnp_IS110,Transposase_20
8.23277	0.392739	0.19462	2.01798	0.0435934	0.127914	382761	384668	1907	+	hypothetical protein	1235803.C825_01902	0	1291	COG0457@1|root,COG0457@2|Bacteria,4NG3F@976|Bacteroidetes,2FM0I@200643|Bacteroidia,22XFW@171551|Porphyromonadaceae	976|Bacteroidetes	S	SusD family	NA	SusD-like_3,SusD_RagB
7.85448	0.676542	0.188396	3.59107	0.000329321	0.00289576	384848	386302	1454	+	Endo-4-O-sulfatase	1235803.C825_01903	0	1024	COG3119@1|root,COG3119@2|Bacteria,4NGX1@976|Bacteroidetes,2FMSX@200643|Bacteroidia,22WIH@171551|Porphyromonadaceae	976|Bacteroidetes	P	Type I phosphodiesterase / nucleotide pyrophosphatase	NA	Sulfatase
7.53925	0.532627	0.205162	2.59613	0.0094281	0.0412817	386314	387711	1397	+	hypothetical protein	1235803.C825_01904	0	991	COG3669@1|root,COG3669@2|Bacteria,4NEDX@976|Bacteroidetes,2FNFV@200643|Bacteroidia,22WIN@171551|Porphyromonadaceae	976|Bacteroidetes	G	F5 8 type C domain protein	NA	Alpha_L_fucos,CHB_HEX_C_1,F5_F8_type_C
7.86622	0.19359	0.162928	1.1882	0.234756	0.426142	387708	389786	2078	+	hypothetical protein	1235803.C825_01905	0	1376	COG3345@1|root,COG3345@2|Bacteria,4P89M@976|Bacteroidetes,2FP57@200643|Bacteroidia	976|Bacteroidetes	G	Raffinose synthase or seed imbibition protein Sip1	NA	Raffinose_syn
7.65252	0.373674	0.241352	1.54825	0.121561	0.26978	389805	391346	1541	+	Arylsulfatase	1235803.C825_01906	0	1078	COG3119@1|root,COG3119@2|Bacteria,4NF1X@976|Bacteroidetes,2FMGA@200643|Bacteroidia,22W18@171551|Porphyromonadaceae	976|Bacteroidetes	P	Sulfatase	NA	DUF4976,Sulfatase
4.17215	3.08418	2.94144	1.04853	NA	NA	391417	391611	194	+	hypothetical protein	NA	NA	NA	NA	NA	NA	NA	NA	NA
3.96844	8.42939	3.36375	2.50595	0.0122123	0.0499214	391673	391783	110	+	hypothetical protein	NA	NA	NA	NA	NA	NA	NA	NA	NA
7.1956	0.644108	0.307472	2.09485	0.0361843	0.112329	391852	392565	713	-	hypothetical protein	1235803.C825_01909	4.62e-163	457	28MFD@1|root,2ZASV@2|Bacteria,4NH4N@976|Bacteroidetes,2FQXU@200643|Bacteroidia,22X7H@171551|Porphyromonadaceae	976|Bacteroidetes	NA	NA	NA	NA
7.99258	0.493446	0.183201	2.69347	0.00707123	0.0332453	392632	395388	2756	-	Multidrug resistance protein MdtB	1235803.C825_01910	0	1782	COG0841@1|root,COG1131@1|root,COG0841@2|Bacteria,COG1131@2|Bacteria,4NF8M@976|Bacteroidetes,2FQY7@200643|Bacteroidia,22XD9@171551|Porphyromonadaceae	976|Bacteroidetes	V	Belongs to the resistance-nodulation-cell division (RND) (TC 2.A.6) family	NA	ABC_tran,ACR_tran
8.08134	0.100008	0.19801	0.505066	0.613513	0.770127	395346	397337	1991	-	Multidrug resistance protein MdtF	1235803.C825_01910	0	1177	COG0841@1|root,COG1131@1|root,COG0841@2|Bacteria,COG1131@2|Bacteria,4NF8M@976|Bacteroidetes,2FQY7@200643|Bacteroidia,22XD9@171551|Porphyromonadaceae	976|Bacteroidetes	V	Belongs to the resistance-nodulation-cell division (RND) (TC 2.A.6) family	NA	ABC_tran,ACR_tran
8.33541	0.554069	0.166935	3.31907	0.000903175	0.00646298	397600	400758	3158	-	Multidrug resistance protein MdtC	1235803.C825_01911	0	1944	COG0841@1|root,COG0841@2|Bacteria,4NGCI@976|Bacteroidetes,2FM1V@200643|Bacteroidia,22WWN@171551|Porphyromonadaceae	976|Bacteroidetes	V	Belongs to the resistance-nodulation-cell division (RND) (TC 2.A.6) family	NA	ACR_tran
7.68405	0.997742	0.192881	5.17284	2.30567e-07	5.90759e-06	400942	402003	1061	-	Multidrug resistance protein MdtA	1235803.C825_01912	6.76e-246	676	COG0845@1|root,COG0845@2|Bacteria,4NERP@976|Bacteroidetes,2FQSG@200643|Bacteroidia,22W5U@171551|Porphyromonadaceae	976|Bacteroidetes	M	Belongs to the membrane fusion protein (MFP) (TC 8.A.1) family	NA	HlyD_D23,OEP
7.42993	-0.11918	0.200619	-0.594061	0.552471	0.729018	402010	403506	1496	-	hypothetical protein	1235803.C825_01913	0	949	COG1538@1|root,COG1538@2|Bacteria,4NGIX@976|Bacteroidetes,2FM9H@200643|Bacteroidia,22WV6@171551|Porphyromonadaceae	976|Bacteroidetes	MU	Outer membrane efflux protein	NA	OEP
8.24532	0.656748	0.137237	4.78549	1.70569e-06	3.47298e-05	403528	406845	3317	-	hypothetical protein	1235803.C825_01914	0	2193	COG1277@1|root,COG1277@2|Bacteria,4NI5T@976|Bacteroidetes,2FNVZ@200643|Bacteroidia,22W2G@171551|Porphyromonadaceae	976|Bacteroidetes	E	ABC-type transport system involved in multi-copper enzyme maturation permease component	NA	Peptidase_M1
7.60833	0.690834	0.210122	3.28777	0.00100983	0.00703278	406867	407730	863	-	putative ABC transporter ATP-binding protein YxlF	1235803.C825_01915	7.59e-212	584	COG1131@1|root,COG1131@2|Bacteria,4NFWM@976|Bacteroidetes,2FP8M@200643|Bacteroidia,22W8V@171551|Porphyromonadaceae	976|Bacteroidetes	V	AAA domain, putative AbiEii toxin, Type IV TA system	NA	ABC_tran
7.96361	0.538025	0.228428	2.35534	0.0185058	0.0678756	407903	408481	578	-	Rubrerythrin	1235803.C825_01916	7.92e-135	382	COG1592@1|root,COG1592@2|Bacteria,4NH0J@976|Bacteroidetes,2FNC9@200643|Bacteroidia,22WSM@171551|Porphyromonadaceae	976|Bacteroidetes	C	Rubrerythrin	rbr	Rubrerythrin
8.02944	0.664239	0.18753	3.54203	0.000397056	0.00335368	408692	410458	1766	+	C4-dicarboxylic acid transporter DauA	1235803.C825_01917	0	1055	COG0659@1|root,COG0659@2|Bacteria,4NF1C@976|Bacteroidetes,2FPEW@200643|Bacteroidia,22WP7@171551|Porphyromonadaceae	976|Bacteroidetes	P	Sulfate permease	sulP	STAS,Sulfate_transp
7.29614	1.3876	0.236063	5.87808	4.15058e-09	1.59902e-07	410462	411139	677	-	hypothetical protein	1235803.C825_01918	2.52e-170	474	2CKZE@1|root,339Y5@2|Bacteria,4NZJ4@976|Bacteroidetes,2FSVD@200643|Bacteroidia	976|Bacteroidetes	NA	NA	NA	NA
8.37987	2.10003	0.237061	8.85858	8.10406e-19	1.9726e-16	411318	411986	668	-	hypothetical protein	1235803.C825_01919	2.82e-161	451	29YKX@1|root,30KG9@2|Bacteria,4PHK1@976|Bacteroidetes,2FUNR@200643|Bacteroidia,2310V@171551|Porphyromonadaceae	976|Bacteroidetes	S	Outer membrane protein beta-barrel domain	NA	OMP_b-brl_2
7.83202	0.797224	0.198632	4.01356	5.98093e-05	0.00073797	412205	413308	1103	+	hypothetical protein	1235803.C825_01920	5.79e-270	738	COG4299@1|root,COG4299@2|Bacteria,4NDZF@976|Bacteroidetes,2FMH5@200643|Bacteroidia,22X85@171551|Porphyromonadaceae	976|Bacteroidetes	S	Psort location CytoplasmicMembrane, score 10.00	NA	DUF1624,DUF5009
8.37539	0.658434	0.168065	3.91773	8.93871e-05	0.0010056	413308	415797	2489	+	hypothetical protein	1235803.C825_01921	0	1698	COG3591@1|root,COG4886@1|root,COG3591@2|Bacteria,COG4886@2|Bacteria,4NG2K@976|Bacteroidetes,2FNQS@200643|Bacteroidia,22XGI@171551|Porphyromonadaceae	976|Bacteroidetes	E	Leucine-rich repeat (LRR) protein	NA	Trypsin,Trypsin_2
8.9063	0.880143	0.171842	5.12181	3.02612e-07	7.46768e-06	416454	417233	779	-	hypothetical protein	1235803.C825_01922	5.9e-186	516	COG0731@1|root,COG0731@2|Bacteria,4NJEM@976|Bacteroidetes,2FMWY@200643|Bacteroidia,22WAC@171551|Porphyromonadaceae	976|Bacteroidetes	C	radical SAM domain protein	NA	Fer4_14,Radical_SAM
8.16549	0.810054	0.1816	4.46064	8.17134e-06	0.000135893	417701	419140	1439	+	Peptidoglycan O-acetyltransferase	1235803.C825_01923	0	975	COG1696@1|root,COG1696@2|Bacteria,4NFK5@976|Bacteroidetes,2FM3F@200643|Bacteroidia,22XRD@171551|Porphyromonadaceae	976|Bacteroidetes	M	MBOAT, membrane-bound O-acyltransferase family	NA	MBOAT
7.47647	1.55223	0.228399	6.79611	1.07482e-11	7.10575e-10	419146	420039	893	+	hypothetical protein	1235803.C825_01924	4.06e-212	586	COG2755@1|root,COG2755@2|Bacteria,4NM85@976|Bacteroidetes,2FRW3@200643|Bacteroidia	976|Bacteroidetes	E	lipolytic protein G-D-S-L family	NA	NA
7.92776	0.579687	0.138158	4.19582	2.7189e-05	0.00038015	420049	422112	2063	-	hypothetical protein	1235803.C825_01925	0	1391	COG1555@1|root,COG1555@2|Bacteria,4NE88@976|Bacteroidetes,2FP15@200643|Bacteroidia,22X8S@171551|Porphyromonadaceae	976|Bacteroidetes	L	Psort location OuterMembrane, score	NA	HHH_3
7.85299	1.33354	0.18052	7.38719	1.4996e-13	1.29522e-11	422126	422932	806	-	hypothetical protein	1235803.C825_01926	2.82e-193	536	2DTC2@1|root,33JN8@2|Bacteria,4PMYA@976|Bacteroidetes,2G0KK@200643|Bacteroidia,22Z02@171551|Porphyromonadaceae	976|Bacteroidetes	NA	NA	NA	NA
7.18365	0.753688	0.321251	2.3461	0.018971	0.0691769	423155	423760	605	+	hypothetical protein	1235803.C825_01927	1.2e-138	392	2CI1G@1|root,2Z7JA@2|Bacteria,4NF1T@976|Bacteroidetes,2FPFD@200643|Bacteroidia,22XYB@171551|Porphyromonadaceae	976|Bacteroidetes	S	Domain of unknown function (DUF4294)	NA	DUF4294
6.40384	1.44932	0.43587	3.32512	0.000883791	0.00636677	423752	424282	530	-	Putative TrmH family tRNA/rRNA methyltransferase	1235803.C825_01928	1.91e-125	357	COG0566@1|root,COG0566@2|Bacteria,4NM8C@976|Bacteroidetes,2FS50@200643|Bacteroidia,22XKS@171551|Porphyromonadaceae	976|Bacteroidetes	J	RNA methyltransferase	spoU	SpoU_methylase
8.72524	0.119476	0.267923	0.445936	0.655643	0.797948	424363	424500	137	+	hypothetical protein	NA	NA	NA	NA	NA	NA	NA	NA	NA
8.58721	0.888819	0.205705	4.32084	1.55433e-05	0.000239868	425351	426337	986	+	Quinolinate synthase A	1235803.C825_01930	8.48e-241	661	COG0379@1|root,COG0379@2|Bacteria,4NDVX@976|Bacteroidetes,2FMT0@200643|Bacteroidia,22VXC@171551|Porphyromonadaceae	976|Bacteroidetes	H	Catalyzes the condensation of iminoaspartate with dihydroxyacetone phosphate to form quinolinate	nadA	NadA
8.3866	1.35248	0.160087	8.44846	2.95164e-17	5.64501e-15	426383	428725	2342	-	hypothetical protein	1235803.C825_01931	0	1505	COG3292@1|root,COG3292@2|Bacteria,4NDWE@976|Bacteroidetes,2FQ6Y@200643|Bacteroidia,22WCG@171551|Porphyromonadaceae	976|Bacteroidetes	T	Two component regulator propeller	NA	Reg_prop
6.54269	0.964033	0.41495	2.32325	0.0201658	0.072378	428729	429310	581	-	dITP/XTP pyrophosphatase	1235803.C825_01932	7.62e-138	389	COG0127@1|root,COG0127@2|Bacteria,4NM42@976|Bacteroidetes,2FP46@200643|Bacteroidia,22XN1@171551|Porphyromonadaceae	976|Bacteroidetes	F	Pyrophosphatase that catalyzes the hydrolysis of nucleoside triphosphates to their monophosphate derivatives, with a high preference for the non-canonical purine nucleotides XTP (xanthosine triphosphate), dITP (deoxyinosine triphosphate) and ITP. Seems to function as a house-cleaning enzyme that removes non-canonical purine nucleotides from the nucleotide pool, thus preventing their incorporation…	rdgB	Ham1p_like
7.28587	0.714233	0.248649	2.87245	0.00407297	0.0211345	429392	430273	881	-	hypothetical protein	1235803.C825_01933	8.06e-201	557	COG1284@1|root,COG1284@2|Bacteria,4NG9F@976|Bacteroidetes,2FP2N@200643|Bacteroidia,22WWJ@171551|Porphyromonadaceae	976|Bacteroidetes	S	membrane	NA	DUF2179,YitT_membrane
8.16873	0.470268	0.180435	2.60629	0.00915278	0.0402407	430273	433110	2837	-	Leucine--tRNA ligase	1235803.C825_01934	0	1952	COG0495@1|root,COG0495@2|Bacteria,4NE5K@976|Bacteroidetes,2FM7V@200643|Bacteroidia,22X0R@171551|Porphyromonadaceae	976|Bacteroidetes	J	Belongs to the class-I aminoacyl-tRNA synthetase family	leuS	Anticodon_1,DUF559,tRNA-synt_1,tRNA-synt_1_2
8.14715	0.511503	0.158127	3.23476	0.00121747	0.00816141	433487	435307	1820	+	hypothetical protein	1235803.C825_01935	0	1215	293IA@1|root,2ZR0D@2|Bacteria,4NPH5@976|Bacteroidetes,2G0V9@200643|Bacteroidia,22ZHN@171551|Porphyromonadaceae	976|Bacteroidetes	S	Spi protease inhibitor	prtT	Inhibitor_I69,Peptidase_C10
7.67626	0.39289	0.203162	1.93388	0.053128	0.147333	435367	436833	1466	-	Arylsulfatase	1235803.C825_01936	0	1031	COG3119@1|root,COG3119@2|Bacteria,4NEM3@976|Bacteroidetes,2FMG2@200643|Bacteroidia,22WGH@171551|Porphyromonadaceae	976|Bacteroidetes	P	Sulfatase	NA	DUF4976,Sulfatase
8.20123	0.56634	0.157933	3.58596	0.000335844	0.00293012	436978	439620	2642	+	DNA mismatch repair protein MutS	1235803.C825_01937	0	1715	COG0249@1|root,COG0249@2|Bacteria,4NEGB@976|Bacteroidetes,2FMFA@200643|Bacteroidia,22WUH@171551|Porphyromonadaceae	976|Bacteroidetes	L	that it carries out the mismatch recognition step. This protein has a weak ATPase activity	mutS	MutS_I,MutS_II,MutS_III,MutS_IV,MutS_V
7.54476	0.332249	0.210324	1.5797	0.114175	0.258523	439623	440873	1250	-	hypothetical protein	1235803.C825_01938	2.1e-306	857	COG1317@1|root,COG1317@2|Bacteria,4NI5I@976|Bacteroidetes,2FMVN@200643|Bacteroidia,22WI5@171551|Porphyromonadaceae	976|Bacteroidetes	NU	Lipid A 3-O-deacylase (PagL)	NA	PagL
6.68042	1.09165	0.507309	2.15185	0.0314092	0.101262	440979	441440	461	-	hypothetical protein	1235803.C825_01939	1.7e-101	294	2E9E6@1|root,333MR@2|Bacteria,4NVIJ@976|Bacteroidetes,2FQN2@200643|Bacteroidia,22YN8@171551|Porphyromonadaceae	976|Bacteroidetes	S	Domain of unknown function (DUF4252)	NA	DUF4252
4.18501	-0.130193	1.6072	-0.0810063	0.935437	0.966638	441445	441846	401	-	hypothetical protein	1235803.C825_01940	1.94e-86	254	COG1413@1|root,COG1413@2|Bacteria,4NUQJ@976|Bacteroidetes,2G2IJ@200643|Bacteroidia	976|Bacteroidetes	C	lyase activity	NA	NA
5.79667	1.61885	0.820459	1.9731	0.0484839	0.137081	441836	442354	518	-	ECF RNA polymerase sigma factor SigJ	1235803.C825_01941	1.4e-116	334	COG1595@1|root,COG1595@2|Bacteria,4NREV@976|Bacteroidetes,2FNCE@200643|Bacteroidia,22YBZ@171551|Porphyromonadaceae	976|Bacteroidetes	K	Sigma-70, region 4	NA	Sigma70_r2,Sigma70_r4_2
6.30386	-0.069113	0.591105	-0.116922	0.906922	0.952642	442338	442787	449	-	hypothetical protein	1235803.C825_01942	5.12e-101	293	2EU1G@1|root,33MIH@2|Bacteria,4NZ7F@976|Bacteroidetes,2FUUZ@200643|Bacteroidia,22YW5@171551|Porphyromonadaceae	976|Bacteroidetes	S	Domain of unknown function (DUF4252)	NA	DUF4252
7.98738	0.171414	0.230637	0.743223	0.457347	0.655363	442912	443811	899	-	hypothetical protein	1235803.C825_01943	4.47e-201	558	COG0697@1|root,COG0697@2|Bacteria,4NG65@976|Bacteroidetes,2FN22@200643|Bacteroidia,22ZQV@171551|Porphyromonadaceae	976|Bacteroidetes	EG	EamA-like transporter family	NA	EamA
8.21885	0.219709	0.203681	1.07869	0.280726	0.482269	444091	445311	1220	-	hypothetical protein	1235803.C825_01944	1.29e-279	766	COG2807@1|root,COG2807@2|Bacteria,4NHUR@976|Bacteroidetes,2FMD3@200643|Bacteroidia,22WZH@171551|Porphyromonadaceae	976|Bacteroidetes	P	Major Facilitator Superfamily	NA	MFS_1
8.04136	0.146843	0.169251	0.867604	0.385611	0.593375	445569	447008	1439	+	Glutamate decarboxylase	1235803.C825_01945	0	988	COG0076@1|root,COG0076@2|Bacteria,4NJ2F@976|Bacteroidetes,2FNM0@200643|Bacteroidia,22WZ2@171551|Porphyromonadaceae	976|Bacteroidetes	E	Belongs to the group II decarboxylase family	gadB	Pyridoxal_deC
7.00178	0.243259	0.378204	0.643197	0.520096	0.70349	447020	447985	965	+	Glutaminase 1	1235803.C825_01946	1.62e-230	634	COG2066@1|root,COG2066@2|Bacteria,4NERJ@976|Bacteroidetes,2FM3D@200643|Bacteroidia,22WTN@171551|Porphyromonadaceae	976|Bacteroidetes	E	Belongs to the glutaminase family	glsA	Glutaminase
7.14711	1.02493	0.258277	3.96834	7.23752e-05	0.000861265	448054	448635	581	-	hypothetical protein	1235803.C825_01947	5.54e-131	372	COG3646@1|root,COG3646@2|Bacteria,4NPHX@976|Bacteroidetes,2G3A8@200643|Bacteroidia	976|Bacteroidetes	S	ORF6N domain	NA	ORF6N
8.29634	0.508833	0.203113	2.50517	0.0122393	0.0499858	448771	449700	929	+	Tyrosine recombinase XerC	1235803.C825_01948	2.67e-223	615	COG4974@1|root,COG4974@2|Bacteria,4NIUH@976|Bacteroidetes,2FMHR@200643|Bacteroidia,231T7@171551|Porphyromonadaceae	976|Bacteroidetes	L	Phage integrase SAM-like domain	NA	Arm-DNA-bind_5,Phage_int_SAM_5,Phage_integrase
8.23607	0.378998	0.1978	1.91607	0.0553561	0.151705	450193	450951	758	+	hypothetical protein	1235803.C825_01949	8e-176	490	28PZ8@1|root,2ZCIQ@2|Bacteria,4NN6Q@976|Bacteroidetes,2FPHQ@200643|Bacteroidia	976|Bacteroidetes	S	Domain of unknown function (DUF4469) with IG-like fold	NA	DUF4469,HU-DNA_bdg
8.47035	1.20755	0.158284	7.62901	2.36564e-14	2.39019e-12	451061	454555	3494	+	hypothetical protein	1235803.C825_03927	7.79e-37	159	2DKMJ@1|root,309XW@2|Bacteria,4NNRT@976|Bacteroidetes,2FQNM@200643|Bacteroidia	976|Bacteroidetes	S	Peptidase C10 family	NA	Inhibitor_I69,Peptidase_C10
7.8923	0.693187	0.199196	3.47992	0.000501568	0.00401838	454659	455429	770	-	hypothetical protein	1235803.C825_01951	3.12e-175	489	COG0664@1|root,COG0664@2|Bacteria,4PNXC@976|Bacteroidetes,2G0ZZ@200643|Bacteroidia,231IW@171551|Porphyromonadaceae	976|Bacteroidetes	T	Ion channel	NA	Ion_trans_2
8.09469	0.680092	0.141886	4.79321	1.64131e-06	3.38046e-05	455630	457189	1559	+	Glutamate/gamma-aminobutyrate antiporter	1235803.C825_01952	0	966	COG0531@1|root,COG0531@2|Bacteria,4NIQT@976|Bacteroidetes,2FM2G@200643|Bacteroidia,22VW8@171551|Porphyromonadaceae	976|Bacteroidetes	E	glutamate gamma-aminobutyrate antiporter	gadC	AA_permease_2
8.2711	0.393845	0.160405	2.45532	0.0140761	0.055588	457284	460892	3608	-	hypothetical protein	1235803.C825_01953	0	2494	COG0639@1|root,COG0639@2|Bacteria,4NZWK@976|Bacteroidetes,2FPXD@200643|Bacteroidia	976|Bacteroidetes	T	alpha-L-rhamnosidase	NA	Glyco_hydro_106
6.97655	-0.252962	0.281189	-0.899616	0.368325	0.575877	461031	461618	587	-	hypothetical protein	1235803.C825_01954	2.02e-143	404	2CXV0@1|root,32T2Q@2|Bacteria,4P4J7@976|Bacteroidetes	976|Bacteroidetes	NA	NA	NA	RbsD_FucU
8.09002	0.661798	0.153701	4.30574	1.66432e-05	0.000251764	461623	464166	2543	-	hypothetical protein	1235803.C825_01955	0	1755	COG4354@1|root,COG4354@2|Bacteria,4NFQW@976|Bacteroidetes,2FQ1M@200643|Bacteroidia,22X7Y@171551|Porphyromonadaceae	976|Bacteroidetes	G	beta-glucosidase 2, glycosyl-hydrolase family 116 N-term	NA	DUF608,Glyco_hydr_116N
7.80196	0.419084	0.183989	2.27777	0.0227402	0.0792799	464232	465863	1631	-	SusD-like protein P2	1235803.C825_01956	0	1126	COG1435@1|root,COG1435@2|Bacteria,4NKPJ@976|Bacteroidetes,2FQ2P@200643|Bacteroidia	976|Bacteroidetes	F	SusD family	NA	SusD-like_3,SusD_RagB
8.17958	0.682177	0.144007	4.7371	2.16802e-06	4.22172e-05	465870	469208	3338	-	TonB-dependent receptor P3	1235803.C825_01957	0	2214	COG1629@1|root,COG4771@2|Bacteria,4P1Z5@976|Bacteroidetes,2FW4E@200643|Bacteroidia	976|Bacteroidetes	P	TonB-linked outer membrane protein, SusC RagA family	NA	CarbopepD_reg_2,Plug,TonB_dep_Rec
7.48931	1.75947	0.219887	8.00169	1.22722e-15	1.60287e-13	469353	470330	977	-	hypothetical protein	1235803.C825_01959	6.91e-234	643	COG3712@1|root,COG3712@2|Bacteria,4NKNV@976|Bacteroidetes,2FQUH@200643|Bacteroidia,22ZEF@171551|Porphyromonadaceae	976|Bacteroidetes	PT	Domain of unknown function (DUF4974)	NA	DUF4974,FecR
7.83329	1.52938	0.266146	5.74642	9.11533e-09	3.34333e-07	470406	470984	578	-	hypothetical protein	1235803.C825_01960	2.09e-130	370	COG1595@1|root,COG1595@2|Bacteria,4NWCP@976|Bacteroidetes,2G33Z@200643|Bacteroidia,231ZX@171551|Porphyromonadaceae	976|Bacteroidetes	K	RNA polymerase sigma-70 factor	NA	Sigma70_r2,Sigma70_r4_2
9.28617	0.985678	0.27626	3.56793	0.000359813	0.00308288	471198	471332	134	-	hypothetical protein	NA	NA	NA	NA	NA	NA	NA	NA	NA
8.01544	0.715192	0.454522	1.5735	0.115602	0.2609	471765	471989	224	-	hypothetical protein	NA	NA	NA	NA	NA	NA	NA	NA	NA
7.40617	0.763399	0.247929	3.0791	0.00207626	0.0125328	472044	472949	905	-	hypothetical protein	1235803.C825_01963	9.29e-220	605	COG1082@1|root,COG1082@2|Bacteria,4NMIK@976|Bacteroidetes,2G38J@200643|Bacteroidia,230UY@171551|Porphyromonadaceae	976|Bacteroidetes	G	Xylose isomerase-like TIM barrel	NA	AP_endonuc_2
5.57816	2.07168	1.01431	2.04245	0.0411065	0.122428	472968	473336	368	-	hypothetical protein	1235803.C825_01964	5.15e-79	235	2FCVR@1|root,344YK@2|Bacteria,4P5RG@976|Bacteroidetes,2FTXQ@200643|Bacteroidia	976|Bacteroidetes	NA	NA	NA	NA
7.78186	0.776127	0.196952	3.94069	8.1246e-05	0.000941715	473366	474985	1619	-	SusD-like protein P2	1235803.C825_01965	0	1107	COG1435@1|root,COG1435@2|Bacteria,4NE0A@976|Bacteroidetes,2FN01@200643|Bacteroidia	976|Bacteroidetes	F	SusD family	NA	SusD-like_3,SusD_RagB
8.26582	0.703117	0.156456	4.49402	6.98898e-06	0.000118813	475004	478387	3383	-	TonB-dependent receptor P3	1235803.C825_01966	0	2241	COG1629@1|root,COG1629@2|Bacteria,4NDXS@976|Bacteroidetes,2FM2D@200643|Bacteroidia,22X7J@171551|Porphyromonadaceae	976|Bacteroidetes	P	TonB dependent receptor	NA	CarbopepD_reg_2,Plug,STN,TonB_dep_Rec
8.07741	1.0515	0.201304	5.22346	1.75609e-07	4.70192e-06	478605	479555	950	-	hypothetical protein	1235803.C825_01967	5.61e-224	617	COG3712@1|root,COG3712@2|Bacteria,4NKTC@976|Bacteroidetes,2FMS6@200643|Bacteroidia,22XRQ@171551|Porphyromonadaceae	976|Bacteroidetes	PT	COG3712 Fe2 -dicitrate sensor, membrane component	NA	DUF4974,FecR
8.48911	0.654412	0.223032	2.93416	0.00334449	0.0181825	479641	480201	560	-	hypothetical protein	1235803.C825_01968	1.73e-126	360	COG1595@1|root,COG1595@2|Bacteria,4NQZK@976|Bacteroidetes,2FM20@200643|Bacteroidia,22YBR@171551|Porphyromonadaceae	976|Bacteroidetes	K	Sigma-70, region 4	NA	Sigma70_r2,Sigma70_r4_2
8.50417	0.389534	0.163384	2.38417	0.0171178	0.0640572	480825	481784	959	-	hypothetical protein	1235803.C825_01969	9e-227	625	2DNBI@1|root,32WMS@2|Bacteria,4NU4W@976|Bacteroidetes,2FU66@200643|Bacteroidia,22YTD@171551|Porphyromonadaceae	976|Bacteroidetes	S	Fimbrillin-like	NA	Mfa_like_1
8.35276	1.51004	0.158907	9.50268	2.04557e-21	7.82431e-19	481990	483114	1124	+	HTH-type transcriptional activator RhaR	1235803.C825_01970	8.28e-253	695	COG4977@1|root,COG4977@2|Bacteria,4NRMC@976|Bacteroidetes,2FSF8@200643|Bacteroidia,22YUH@171551|Porphyromonadaceae	976|Bacteroidetes	K	helix_turn_helix, arabinose operon control protein	NA	HTH_18
8.32775	1.12977	0.212473	5.31722	1.05365e-07	2.98533e-06	483254	484444	1190	+	O-acetyltransferase WecH	1235803.C825_01971	1.43e-296	808	COG3274@1|root,COG3274@2|Bacteria,4NP3U@976|Bacteroidetes,2FN6D@200643|Bacteroidia,22XW5@171551|Porphyromonadaceae	976|Bacteroidetes	S	Acyltransferase family	NA	Acyl_transf_3
7.32131	0.419357	0.233237	1.79799	0.0721785	0.185534	484729	485388	659	-	Lipopolysaccharide export system ATP-binding protein LptB	1235803.C825_01972	1.77e-158	444	COG1137@1|root,COG1137@2|Bacteria,4NIH5@976|Bacteroidetes,2FSWS@200643|Bacteroidia,22YH9@171551|Porphyromonadaceae	976|Bacteroidetes	S	ATPases associated with a variety of cellular activities	NA	ABC_tran
5.47049	0.924777	1.11375	0.830324	0.406355	0.612483	485367	485714	347	-	hypothetical protein	NA	NA	NA	NA	NA	NA	NA	NA	NA
8.00172	0.505667	0.177043	2.85618	0.00428774	0.0219932	485849	486874	1025	-	hypothetical protein	1235803.C825_01974	1.69e-258	707	2DNWV@1|root,32ZKP@2|Bacteria,4NWSE@976|Bacteroidetes,2FT2I@200643|Bacteroidia,22YTG@171551|Porphyromonadaceae	976|Bacteroidetes	NA	NA	NA	NA
8.23691	0.0330696	0.14765	0.223973	0.822779	0.904162	487143	489542	2399	-	Beta-xylosidase	1235803.C825_01975	0	1607	COG1472@1|root,COG1472@2|Bacteria,4NE90@976|Bacteroidetes,2FMCU@200643|Bacteroidia,22WVV@171551|Porphyromonadaceae	976|Bacteroidetes	G	Fibronectin type III-like domain	NA	Fn3-like,Glyco_hydro_3,Glyco_hydro_3_C
7.82396	0.430694	0.175529	2.45369	0.01414	0.0557583	489664	491280	1616	-	hypothetical protein	1235803.C825_01976	0	1083	COG4198@1|root,COG4198@2|Bacteria,4NEAX@976|Bacteroidetes,2FQ98@200643|Bacteroidia	976|Bacteroidetes	H	Susd and RagB outer membrane lipoprotein	NA	SusD-like,SusD-like_2
8.29606	0.138409	0.175337	0.789389	0.429885	0.632561	491317	494604	3287	-	hypothetical protein	1235803.C825_01977	0	2201	COG1629@1|root,COG4771@2|Bacteria,4NDU8@976|Bacteroidetes,2FMRZ@200643|Bacteroidia	976|Bacteroidetes	P	TonB-linked outer membrane protein, SusC RagA family	NA	CarbopepD_reg_2,Plug,TonB_dep_Rec
8.56732	0.492738	0.207121	2.37899	0.0173601	0.0646925	495015	498980	3965	+	Sensor histidine kinase RcsC	1235803.C825_01978	0	2587	COG0745@1|root,COG3292@1|root,COG5002@1|root,COG0745@2|Bacteria,COG3292@2|Bacteria,COG5002@2|Bacteria,4P2A4@976|Bacteroidetes,2FXBE@200643|Bacteroidia	976|Bacteroidetes	T	Y_Y_Y domain	NA	HATPase_c,HTH_18,HisKA,Reg_prop,Response_reg,Y_Y_Y
8.42268	0.589723	0.178171	3.30986	0.000933415	0.00662242	499475	501199	1724	+	hypothetical protein	1235803.C825_01979	0	1117	COG2373@1|root,COG2373@2|Bacteria	2|Bacteria	U	Large extracellular alpha-helical protein	NA	A2M_N,Plug
7.87128	0.618785	0.228056	2.71331	0.00666154	0.0315407	501377	502480	1103	-	Ribosome-binding ATPase YchF	1235803.C825_01980	8.1e-261	715	COG0012@1|root,COG0012@2|Bacteria,4NF7N@976|Bacteroidetes,2FMWX@200643|Bacteroidia,22W5D@171551|Porphyromonadaceae	976|Bacteroidetes	J	ATPase that binds to both the 70S ribosome and the 50S ribosomal subunit in a nucleotide-independent manner	ychF	MMR_HSR1,YchF-GTPase_C
4.4535	1.9133	2.49048	0.768248	0.44234	0.643152	502615	502827	212	-	hypothetical protein	1235803.C825_01981	2.45e-44	143	2EC32@1|root,33621@2|Bacteria,4P78E@976|Bacteroidetes,2FVS3@200643|Bacteroidia	976|Bacteroidetes	S	Protein of unknown function (DUF3791)	NA	DUF3791
5.54657	1.54314	1.04124	1.48202	0.138336	0.294665	502834	503319	485	-	hypothetical protein	1235803.C825_01982	5e-116	332	28IR3@1|root,2Z8QN@2|Bacteria,4NU1F@976|Bacteroidetes,2G12J@200643|Bacteroidia,2313Y@171551|Porphyromonadaceae	976|Bacteroidetes	S	Protein of unknown function (DUF3990)	NA	DUF3990
4.43883	1.61372	2.52506	0.639081	0.52277	0.705325	503316	503552	236	-	hypothetical protein	1235803.C825_01983	6.83e-50	158	2DR2K@1|root,339WC@2|Bacteria,4P6RF@976|Bacteroidetes,2FVAI@200643|Bacteroidia	976|Bacteroidetes	S	Protein of unknown function (DUF3791)	NA	DUF3791
7.381	0.445457	0.237907	1.8724	0.0611515	0.164144	503771	504790	1019	-	hypothetical protein	1235803.C825_00189	5.1e-05	53.1	2F8ZB@1|root,341B2@2|Bacteria,4P4SF@976|Bacteroidetes,2FUV2@200643|Bacteroidia,2318M@171551|Porphyromonadaceae	976|Bacteroidetes	S	TolB-like 6-blade propeller-like	NA	TolB_like
6.3611	0.968449	1.51527	0.639124	0.522742	0.705325	504858	505043	185	-	hypothetical protein	1347393.HG726024_gene2925	3.97e-07	52.4	COG3391@1|root,COG3391@2|Bacteria,4P02P@976|Bacteroidetes,2FNKC@200643|Bacteroidia,4AKY6@815|Bacteroidaceae	976|Bacteroidetes	S	6-bladed beta-propeller	NA	DUF5128
8.16554	0.424738	0.197036	2.15564	0.0311122	0.100607	505259	508045	2786	-	DNA polymerase I	1235803.C825_01987	0	1805	COG0258@1|root,COG0749@1|root,COG0258@2|Bacteria,COG0749@2|Bacteria,4NDVA@976|Bacteroidetes,2FM8X@200643|Bacteroidia,22WNP@171551|Porphyromonadaceae	976|Bacteroidetes	L	In addition to polymerase activity, this DNA polymerase exhibits 5'-3' exonuclease activity	polA	5_3_exonuc,5_3_exonuc_N,DNA_pol_A,DNA_pol_A_exo1
7.54846	0.450003	0.223606	2.01248	0.0441694	0.128818	508145	509119	974	+	Octaprenyl diphosphate synthase	1235803.C825_01988	1.88e-226	624	COG0142@1|root,COG0142@2|Bacteria,4NET2@976|Bacteroidetes,2FMMI@200643|Bacteroidia,22WX7@171551|Porphyromonadaceae	976|Bacteroidetes	H	Belongs to the FPP GGPP synthase family	ispB	polyprenyl_synt
7.50837	0.225241	0.237538	0.948231	0.343012	0.549095	509295	510233	938	-	Deoxyribose-phosphate aldolase	1235803.C825_01989	3.98e-206	572	COG0274@1|root,COG0274@2|Bacteria,4NGE3@976|Bacteroidetes,2FMTH@200643|Bacteroidia,22W3Q@171551|Porphyromonadaceae	976|Bacteroidetes	F	Catalyzes a reversible aldol reaction between acetaldehyde and D-glyceraldehyde 3-phosphate to generate 2-deoxy- D-ribose 5-phosphate	deoC	DeoC
1.06598	-3.92868	4.00987	-0.979754	0.327208	0.534044	510237	510569	332	-	putative protein YpjD	1235803.C825_01990	1.55e-72	218	COG1694@1|root,COG1694@2|Bacteria,4NQ3H@976|Bacteroidetes,2FT28@200643|Bacteroidia,22Y6R@171551|Porphyromonadaceae	976|Bacteroidetes	S	MazG nucleotide pyrophosphohydrolase domain	ypjD	MazG
5.81762	1.80586	0.679957	2.65584	0.00791109	0.0361467	510571	511023	452	-	D-aminoacyl-tRNA deacylase	1235803.C825_01991	4.21e-105	303	COG1490@1|root,COG1490@2|Bacteria,4NNFF@976|Bacteroidetes,2FNMW@200643|Bacteroidia,22XWS@171551|Porphyromonadaceae	976|Bacteroidetes	J	rejects L-amino acids rather than detecting D-amino acids in the active site. By recycling D-aminoacyl-tRNA to D-amino acids and free tRNA molecules, this enzyme counteracts the toxicity associated with the formation of D-aminoacyl-tRNA entities in vivo and helps enforce protein L-homochirality	dtd	Tyr_Deacylase
7.87001	0.223112	0.177836	1.2546	0.209626	0.395116	511032	512840	1808	-	UvrABC system protein C	1235803.C825_01992	0	1176	COG0322@1|root,COG0322@2|Bacteria,4NE61@976|Bacteroidetes,2FNW9@200643|Bacteroidia,22W6Y@171551|Porphyromonadaceae	976|Bacteroidetes	L	The UvrABC repair system catalyzes the recognition and processing of DNA lesions. UvrC both incises the 5' and 3' sides of the lesion. The N-terminal half is responsible for the 3' incision and the C-terminal half is responsible for the 5' incision	uvrC	GIY-YIG,HHH_2,HHH_5,UVR,UvrC_HhH_N
8.03703	0.361089	0.140233	2.57492	0.0100263	0.0433689	512924	514861	1937	-	tRNA uridine 5-carboxymethylaminomethyl modification enzyme MnmG	1235803.C825_01993	0	1279	COG0445@1|root,COG0445@2|Bacteria,4NFNH@976|Bacteroidetes,2FMA5@200643|Bacteroidia,22WWR@171551|Porphyromonadaceae	976|Bacteroidetes	D	NAD-binding protein involved in the addition of a carboxymethylaminomethyl (cmnm) group at the wobble position (U34) of certain tRNAs, forming tRNA-cmnm(5)s(2)U34	gidA	GIDA,GIDA_assoc
7.33087	0.5688	0.282664	2.01228	0.0441902	0.128818	515017	515676	659	+	hypothetical protein	1235803.C825_01994	1.51e-159	446	2DV38@1|root,33TU9@2|Bacteria,4P2PK@976|Bacteroidetes,2FRAD@200643|Bacteroidia,230QG@171551|Porphyromonadaceae	976|Bacteroidetes	NA	NA	NA	OMP_b-brl
5.27986	-0.31725	1.5434	-0.205553	0.83714	0.912083	515689	516111	422	+	hypothetical protein	1235803.C825_01995	3.69e-101	292	2BFTD@1|root,329NB@2|Bacteria,4PHNK@976|Bacteroidetes,2FSP7@200643|Bacteroidia,2317Q@171551|Porphyromonadaceae	976|Bacteroidetes	NA	NA	NA	NA
7.10177	0.779744	0.473421	1.64704	0.0995494	0.235567	516135	516890	755	-	Transcriptional regulatory protein BtsR	1235803.C825_01996	2.38e-172	481	COG3279@1|root,COG3279@2|Bacteria,4NNHE@976|Bacteroidetes,2FUZW@200643|Bacteroidia,22ZYW@171551|Porphyromonadaceae	976|Bacteroidetes	T	LytTr DNA-binding domain	NA	LytTR,Response_reg
8.14772	0.577084	0.165304	3.49105	0.00048112	0.00387428	516901	519504	2603	-	hypothetical protein	1235803.C825_01997	0	1733	COG2972@1|root,COG2972@2|Bacteria,4NFZB@976|Bacteroidetes,2G2V9@200643|Bacteroidia,22ZVP@171551|Porphyromonadaceae	976|Bacteroidetes	T	Histidine kinase	NA	His_kinase,Reg_prop,Y_Y_Y
8.25851	2.10054	0.260513	8.06311	7.43774e-16	1.02126e-13	519650	520066	416	-	hypothetical protein	1235803.C825_01998	8.75e-90	263	292M0@1|root,2ZQ4X@2|Bacteria,4P6Y5@976|Bacteroidetes,2FZNG@200643|Bacteroidia	976|Bacteroidetes	NA	NA	NA	NA
7.65506	1.51022	0.796829	1.89529	0.0580536	0.157646	520270	520704	434	-	Endoribonuclease YbeY	1235803.C825_01999	5.19e-103	297	COG0319@1|root,COG0319@2|Bacteria,4NS93@976|Bacteroidetes,2FS5C@200643|Bacteroidia,22XW3@171551|Porphyromonadaceae	976|Bacteroidetes	S	Single strand-specific metallo-endoribonuclease involved in late-stage 70S ribosome quality control and in maturation of the 3' terminus of the 16S rRNA	ybeY	UPF0054
8.16828	0.230561	0.173766	1.32685	0.184559	0.362285	520843	522075	1232	-	hypothetical protein	1235803.C825_02000	6.43e-282	772	COG0700@1|root,COG2715@1|root,COG0700@2|Bacteria,COG2715@2|Bacteria,4NFUN@976|Bacteroidetes,2FNNY@200643|Bacteroidia,22VV0@171551|Porphyromonadaceae	976|Bacteroidetes	S	membrane	spmA	Gate
8.02569	1.07414	0.261769	4.10337	4.07177e-05	0.000529231	522434	523312	878	+	hypothetical protein	1235803.C825_02001	8.57e-216	595	2BZEB@1|root,2ZMZD@2|Bacteria,4NMWK@976|Bacteroidetes,2FQNP@200643|Bacteroidia,22XQ3@171551|Porphyromonadaceae	976|Bacteroidetes	S	Protein of unknown function (DUF1573)	NA	DUF1573
7.22613	2.19981	0.38009	5.78761	7.13956e-09	2.65502e-07	523509	523793	284	+	hypothetical protein	1235803.C825_02443	3.15e-15	71.2	296Z9@1|root,2ZU7U@2|Bacteria,4P8CM@976|Bacteroidetes	976|Bacteroidetes	S	NVEALA protein	NA	NVEALA
8.17548	1.69433	0.227135	7.45958	8.67982e-14	7.87804e-12	523922	525052	1130	+	hypothetical protein	1235803.C825_02004	2.83e-286	780	2EYV9@1|root,33S2D@2|Bacteria,4P02F@976|Bacteroidetes,2FQIY@200643|Bacteroidia	976|Bacteroidetes	NA	NA	NA	TolB_like
8.25563	1.12777	0.132564	8.50737	1.77928e-17	3.52891e-15	525091	527010	1919	+	hypothetical protein	1235803.C825_02005	0	1343	COG1305@1|root,COG1305@2|Bacteria,4NGMN@976|Bacteroidetes,2FM89@200643|Bacteroidia,22W96@171551|Porphyromonadaceae	976|Bacteroidetes	E	non supervised orthologous group	NA	NA
7.33814	0.374186	0.23365	1.60148	0.10927	0.250702	527127	528089	962	+	Putative 2-hydroxyacid dehydrogenase	1235803.C825_02006	1.57e-232	639	COG1052@1|root,COG1052@2|Bacteria,4PKE3@976|Bacteroidetes,2G31I@200643|Bacteroidia,22WVY@171551|Porphyromonadaceae	976|Bacteroidetes	CH	Belongs to the D-isomer specific 2-hydroxyacid dehydrogenase family	NA	2-Hacid_dh,2-Hacid_dh_C
6.37347	0.331696	0.549674	0.603441	0.546215	0.725028	528086	528787	701	+	hypothetical protein	1235803.C825_02007	2.49e-165	462	COG4912@1|root,COG4912@2|Bacteria,4NKBS@976|Bacteroidetes,2FM3U@200643|Bacteroidia,22XNZ@171551|Porphyromonadaceae	976|Bacteroidetes	L	DNA alkylation repair	NA	DNA_alkylation
7.84192	-0.416535	0.169203	-2.46175	0.0138261	0.0549659	528791	529534	743	+	hypothetical protein	1235803.C825_02008	9.1e-184	510	COG0177@1|root,COG0177@2|Bacteria,4NE7K@976|Bacteroidetes,2FMKR@200643|Bacteroidia,22YCK@171551|Porphyromonadaceae	976|Bacteroidetes	L	Protein of unknown function (DUF2400)	NA	DUF2400
7.95729	0.0988947	0.181762	0.544089	0.58638	0.750931	529912	531141	1229	-	N-acetylneuraminate epimerase	1235803.C825_02009	1.21e-305	834	COG3055@1|root,COG3055@2|Bacteria,4NP3D@976|Bacteroidetes,2FMI0@200643|Bacteroidia	976|Bacteroidetes	S	Cyclically-permuted mutarotase family protein	NA	Kelch_1,Kelch_4
7.77271	0.0862074	0.165064	0.522266	0.601485	0.762356	531146	533254	2108	-	hypothetical protein	1235803.C825_02010	0	1454	COG2755@1|root,COG2755@2|Bacteria,4NK31@976|Bacteroidetes,2G3HM@200643|Bacteroidia,22VZS@171551|Porphyromonadaceae	976|Bacteroidetes	E	Carbohydrate esterase, sialic acid-specific acetylesterase	estS	Lipase_GDSL_2,SASA
7.75115	0.179677	0.167608	1.07201	0.283717	0.486	533270	535279	2009	-	hypothetical protein	1235803.C825_02011	0	1410	COG3525@1|root,COG3525@2|Bacteria,4NF9Z@976|Bacteroidetes,2FP2G@200643|Bacteroidia,22XDY@171551|Porphyromonadaceae	976|Bacteroidetes	G	Glycosyl hydrolase family 20, catalytic domain protein	NA	Glyco_hydro_20,Glyco_hydro_20b
7.65843	0.4479	0.17691	2.5318	0.0113479	0.0474379	535285	536949	1664	-	hypothetical protein	1235803.C825_02012	0	1100	COG4409@1|root,COG4409@2|Bacteria,4NFNK@976|Bacteroidetes,2FNCR@200643|Bacteroidia,22WP4@171551|Porphyromonadaceae	976|Bacteroidetes	G	N-terminal domain of BNR-repeat neuraminidase	nanH	BNR_2,BNR_3,BNR_assoc_N
7.37927	0.676248	0.302574	2.23498	0.0254185	0.0862587	536971	538215	1244	-	Hexuronate transporter	1235803.C825_02013	2.08e-305	832	COG2271@1|root,COG2271@2|Bacteria,4NFKX@976|Bacteroidetes,2FPKV@200643|Bacteroidia,22WHS@171551|Porphyromonadaceae	976|Bacteroidetes	G	Major Facilitator Superfamily	NA	MFS_1
7.34214	-0.076098	0.206437	-0.368626	0.712407	0.834961	538221	539423	1202	-	Cellobiose 2-epimerase	1235803.C825_02014	1.41e-305	853	COG2942@1|root,COG2942@2|Bacteria,4NEFV@976|Bacteroidetes,2FN6V@200643|Bacteroidia,22WNI@171551|Porphyromonadaceae	976|Bacteroidetes	G	N-acylglucosamine 2-epimerase (GlcNAc 2-epimerase)	nanE	GlcNAc_2-epim
7.45327	0.0812972	0.267199	0.304258	0.760932	0.86901	539429	540346	917	-	N-acetylneuraminate lyase	1235803.C825_02015	6.36e-229	629	COG0329@1|root,COG0329@2|Bacteria,4NHBA@976|Bacteroidetes,2FM35@200643|Bacteroidia,22WCK@171551|Porphyromonadaceae	976|Bacteroidetes	EM	Belongs to the DapA family	nanA	DHDPS
7.83473	0.252991	0.161417	1.56731	0.117041	0.262901	540529	542145	1616	-	SusD-like protein P25	1235803.C825_02016	0	1095	COG0702@1|root,COG0702@2|Bacteria,4NEPE@976|Bacteroidetes,2FMBU@200643|Bacteroidia	976|Bacteroidetes	GM	SusD family	NA	SusD-like_3,SusD_RagB
8.39823	0.702111	0.166356	4.22052	2.43739e-05	0.000345297	542180	545488	3308	-	TonB-dependent receptor P26	1235803.C825_02017	0	2191	COG1629@1|root,COG1629@2|Bacteria,4NDXS@976|Bacteroidetes,2FKYX@200643|Bacteroidia	976|Bacteroidetes	P	TonB-linked outer membrane protein, SusC RagA family	NA	CarbopepD_reg_2,Plug,TonB_dep_Rec
9.9735	1.75116	0.360113	4.8628	1.15734e-06	2.50914e-05	546119	546301	182	+	hypothetical protein	NA	NA	NA	NA	NA	NA	NA	NA	NA
8.48445	0.809575	0.145949	5.54696	2.9068e-08	9.54964e-07	546595	547806	1211	+	N-acetylglucosamine repressor	1235803.C825_02019	5.15e-289	789	COG1522@1|root,COG1940@1|root,COG1522@2|Bacteria,COG1940@2|Bacteria,4NFZ1@976|Bacteroidetes,2FNEQ@200643|Bacteroidia,22XBR@171551|Porphyromonadaceae	976|Bacteroidetes	GK	ROK family	nagC	HTH_24,ROK
7.48082	0.843642	0.255193	3.30589	0.000946738	0.0066972	548024	548587	563	+	ECF RNA polymerase sigma factor RpoE	1235803.C825_02020	8.9e-125	356	COG1595@1|root,COG1595@2|Bacteria,4NS1I@976|Bacteroidetes,2FNDV@200643|Bacteroidia,2310B@171551|Porphyromonadaceae	976|Bacteroidetes	K	Sigma-70, region 4	NA	Sigma70_r2,Sigma70_r4_2
7.9381	1.23048	0.186296	6.60498	3.9756e-11	2.24098e-09	548644	549657	1013	+	hypothetical protein	1235803.C825_02021	1.59e-245	674	COG3712@1|root,COG3712@2|Bacteria,4P2MV@976|Bacteroidetes,2FS9V@200643|Bacteroidia	976|Bacteroidetes	PT	Domain of unknown function (DUF4974)	NA	DUF4974,FecR
8.19708	0.284216	0.163903	1.73405	0.0829087	0.207272	549788	553138	3350	+	TonB-dependent receptor P26	1235803.C825_02022	0	2202	COG1629@1|root,COG1629@2|Bacteria,4NDXS@976|Bacteroidetes,2FM2D@200643|Bacteroidia,2328T@171551|Porphyromonadaceae	976|Bacteroidetes	P	Secretin and TonB N terminus short domain	NA	CarbopepD_reg_2,Plug,STN,TonB_dep_Rec
7.81218	0.46734	0.209342	2.23242	0.0255872	0.0866663	553154	554776	1622	+	SusD-like protein P2	1235803.C825_02023	0	1094	COG1435@1|root,COG1435@2|Bacteria,4NFWU@976|Bacteroidetes,2FNY3@200643|Bacteroidia,22XJ7@171551|Porphyromonadaceae	976|Bacteroidetes	F	SusD family	NA	SusD-like_3,SusD_RagB
7.43877	-0.178433	0.260639	-0.684599	0.493597	0.682296	554809	555936	1127	+	hypothetical protein	1235803.C825_02024	9.27e-271	741	2C0N3@1|root,2ZB2Q@2|Bacteria,4NKNW@976|Bacteroidetes,2FRBG@200643|Bacteroidia,22ZUK@171551|Porphyromonadaceae	976|Bacteroidetes	S	SusE outer membrane protein	NA	SusE
7.47835	0.383488	0.193448	1.98239	0.0474358	0.135044	555949	557088	1139	+	hypothetical protein	1235803.C825_02025	5.46e-281	767	2C0N3@1|root,2Z8N4@2|Bacteria,4NJ1V@976|Bacteroidetes,2FPZP@200643|Bacteroidia,22XR1@171551|Porphyromonadaceae	976|Bacteroidetes	S	SusE outer membrane protein	NA	SusE,SusF_SusE
7.653	0.840276	0.200382	4.19338	2.7483e-05	0.000380288	557190	558314	1124	+	hypothetical protein	1235803.C825_02026	5.69e-285	776	COG4833@1|root,COG4833@2|Bacteria,4NEI3@976|Bacteroidetes,2FR8M@200643|Bacteroidia,22XG9@171551|Porphyromonadaceae	976|Bacteroidetes	G	Glycosyl hydrolase family 76	NA	Glyco_hydro_76
8.06865	0.73881	0.163354	4.52274	6.10429e-06	0.000106131	558392	560539	2147	+	hypothetical protein	1235803.C825_02027	0	1490	COG3537@1|root,COG3537@2|Bacteria,4NDYB@976|Bacteroidetes,2FQHJ@200643|Bacteroidia,22XIE@171551|Porphyromonadaceae	976|Bacteroidetes	G	Glycosyl hydrolase family 92	NA	Glyco_hydro_92
6.58261	0.433109	0.528334	0.819764	0.412351	0.617143	560624	561313	689	-	ABC transporter ATP-binding protein NatA	1235803.C825_02028	2.5e-163	457	COG1131@1|root,COG1131@2|Bacteria,4NIVX@976|Bacteroidetes,2FRVH@200643|Bacteroidia,231HS@171551|Porphyromonadaceae	976|Bacteroidetes	V	AAA domain, putative AbiEii toxin, Type IV TA system	NA	ABC_tran
7.95954	0.33774	0.224368	1.5053	0.132248	0.286831	561279	562247	968	-	hypothetical protein	1235803.C825_02029	8.94e-224	617	2ED88@1|root,3374T@2|Bacteria,4NUXC@976|Bacteroidetes,2FVKU@200643|Bacteroidia,230VR@171551|Porphyromonadaceae	976|Bacteroidetes	NA	NA	NA	NA
8.87789	1.18307	0.197166	6.00038	1.96854e-09	8.22196e-08	562697	563578	881	-	hypothetical protein	457424.BFAG_02952	7.45e-06	55.5	29FVJ@1|root,2ZYYK@2|Bacteria,4PE66@976|Bacteroidetes,2FTR6@200643|Bacteroidia,4ARAK@815|Bacteroidaceae	976|Bacteroidetes	NA	NA	NA	Trans_reg_C
8.26964	1.47066	0.499262	2.94567	0.00322251	0.0177533	563864	564247	383	+	hypothetical protein	272559.BF9343_2904	1.31e-42	150	2E9Q3@1|root,333WF@2|Bacteria,4NWZC@976|Bacteroidetes,2FUTJ@200643|Bacteroidia,4AU9K@815|Bacteroidaceae	976|Bacteroidetes	S	TolB-like 6-blade propeller-like	NA	TolB_like
8.22133	0.730652	0.169537	4.3097	1.63478e-05	0.000248701	564414	565583	1169	-	hypothetical protein	1235803.C825_02032	1.85e-284	776	COG1373@1|root,COG1373@2|Bacteria,4NE3E@976|Bacteroidetes,2FP33@200643|Bacteroidia,23032@171551|Porphyromonadaceae	976|Bacteroidetes	S	AAA domain	NA	AAA_14
7.67095	0.753573	0.210641	3.57753	0.000346863	0.00300073	565833	566825	992	+	Holliday junction ATP-dependent DNA helicase RuvB	1235803.C825_02033	6.15e-235	646	COG2255@1|root,COG2255@2|Bacteria,4NEB9@976|Bacteroidetes,2FNZB@200643|Bacteroidia,22W3Z@171551|Porphyromonadaceae	976|Bacteroidetes	L	The RuvA-RuvB complex in the presence of ATP renatures cruciform structure in supercoiled DNA with palindromic sequence, indicating that it may promote strand exchange reactions in homologous recombination. RuvAB is a helicase that mediates the Holliday junction migration by localized denaturation and reannealing	ruvB	RuvB_C,RuvB_N
7.65215	0.935987	0.208991	4.47861	7.51323e-06	0.00012652	566834	568339	1505	+	hypothetical protein	1235803.C825_02034	0	972	COG2244@1|root,COG2244@2|Bacteria,4NDZ0@976|Bacteroidetes,2FKYU@200643|Bacteroidia,22W09@171551|Porphyromonadaceae	976|Bacteroidetes	S	Polysaccharide biosynthesis protein	cap	Polysacc_synt,Polysacc_synt_3,Polysacc_synt_C
8.03875	0.342499	0.150495	2.27581	0.0228572	0.079597	568342	570402	2060	-	Adaptive-response sensory-kinase SasA	1235803.C825_02035	0	1323	COG0642@1|root,COG2205@2|Bacteria,4NJCH@976|Bacteroidetes,2FMSB@200643|Bacteroidia,22ZEQ@171551|Porphyromonadaceae	976|Bacteroidetes	T	His Kinase A (phosphoacceptor) domain	NA	HATPase_c,HisKA
7.93067	0.38291	0.19984	1.91608	0.0553544	0.151705	570634	571992	1358	+	hypothetical protein	1235803.C825_02036	4.64e-305	847	COG1808@1|root,COG1808@2|Bacteria,4NDXI@976|Bacteroidetes,2FMJZ@200643|Bacteroidia,22X46@171551|Porphyromonadaceae	976|Bacteroidetes	S	membrane	NA	DUF389
8.39029	0.413565	0.202033	2.04702	0.0406561	0.121832	572008	574140	2132	+	Dipeptidyl-peptidase 7	1235803.C825_02037	0	1428	COG3591@1|root,COG3591@2|Bacteria,4NEAK@976|Bacteroidetes,2FMI1@200643|Bacteroidia,22W04@171551|Porphyromonadaceae	976|Bacteroidetes	E	peptidase	dpp7	Peptidase_S46
8.48562	0.56973	0.193594	2.94291	0.00325142	0.0178212	575045	578365	3320	+	TonB-dependent receptor P26	1235803.C825_02038	0	2239	COG4206@1|root,COG4206@2|Bacteria,4P258@976|Bacteroidetes,2FX80@200643|Bacteroidia,23245@171551|Porphyromonadaceae	976|Bacteroidetes	H	TonB dependent receptor	NA	CarbopepD_reg_2,Plug,TonB_dep_Rec
8.14512	0.828693	0.14084	5.88395	4.00597e-09	1.55449e-07	578378	580039	1661	+	hypothetical protein	1235803.C825_02039	0	1117	COG1834@1|root,COG1834@2|Bacteria,4NFQ7@976|Bacteroidetes,2FNG1@200643|Bacteroidia	976|Bacteroidetes	E	COG NOG25454 non supervised orthologous group	NA	SusD-like_3,SusD_RagB
8.08498	0.0110011	0.136765	0.0804382	0.935889	0.966749	580321	583155	2834	-	Beta-galactosidase BoGH2A	1235803.C825_02040	0	1953	COG3250@1|root,COG3250@2|Bacteria,4P1MZ@976|Bacteroidetes,2G2RY@200643|Bacteroidia	976|Bacteroidetes	G	Domain of unknown function (DUF4982)	NA	DUF4982,Glyco_hydro_2,Glyco_hydro_2_C,Glyco_hydro_2_N
7.57913	0.864185	0.287493	3.00594	0.00264765	0.015229	583172	584119	947	-	hypothetical protein	1235803.C825_02041	2.5e-231	636	COG1524@1|root,COG1524@2|Bacteria,4NF0I@976|Bacteroidetes,2FNC7@200643|Bacteroidia	976|Bacteroidetes	S	Tat pathway signal sequence domain protein	NA	Phosphodiest
8.30735	0.320059	0.162123	1.97418	0.0483615	0.136807	584241	586655	2414	-	hypothetical protein	1235803.C825_02042	0	1666	COG1554@1|root,COG1554@2|Bacteria,4NEWW@976|Bacteroidetes,2FMF9@200643|Bacteroidia,22W4V@171551|Porphyromonadaceae	976|Bacteroidetes	G	Glycosyl hydrolase family 65, N-terminal domain	NA	Glyco_hyd_65N_2
8.33891	0.256328	0.162937	1.57317	0.115679	0.260936	587238	589898	2660	-	hypothetical protein	1235803.C825_02043	0	1813	COG1874@1|root,COG1874@2|Bacteria,4NE2P@976|Bacteroidetes,2FP5E@200643|Bacteroidia	976|Bacteroidetes	G	Belongs to the glycosyl hydrolase 35 family	NA	Glyco_hydro_35
6.15218	-0.1338	0.541525	-0.24708	0.804846	0.895714	589925	590386	461	-	hypothetical protein	1235803.C825_02044	5.07e-103	298	2E0CT@1|root,32VZN@2|Bacteria,4NU7H@976|Bacteroidetes,2FUVW@200643|Bacteroidia	976|Bacteroidetes	NA	NA	NA	NA
7.84869	0.471881	0.160653	2.93727	0.00331115	0.0180326	590421	592166	1745	-	hypothetical protein	1235803.C825_02045	0	1182	COG1435@1|root,COG1435@2|Bacteria,4NGNY@976|Bacteroidetes,2FMGM@200643|Bacteroidia	976|Bacteroidetes	F	SusD family	NA	SusD-like_3,SusD_RagB
8.16393	0.327854	0.15878	2.06483	0.0389388	0.118339	592210	595572	3362	-	TonB-dependent receptor P39	1235803.C825_02046	0	2155	COG1629@1|root,COG1629@2|Bacteria,4NDXS@976|Bacteroidetes,2FM2D@200643|Bacteroidia,22Z7A@171551|Porphyromonadaceae	976|Bacteroidetes	P	CarboxypepD_reg-like domain	NA	CarbopepD_reg_2,Plug,STN
7.80669	0.283866	0.208467	1.36168	0.173298	0.346532	595740	596705	965	-	hypothetical protein	1235803.C825_02047	4.28e-226	623	COG3712@1|root,COG3712@2|Bacteria,4P18H@976|Bacteroidetes,2FQ36@200643|Bacteroidia	976|Bacteroidetes	PT	Domain of unknown function (DUF4974)	NA	DUF4974,FecR
6.29329	-0.29043	0.597875	-0.48577	0.62713	0.779546	596800	597363	563	-	putative RNA polymerase sigma factor FecI	1235803.C825_02048	1.13e-127	363	COG1595@1|root,COG1595@2|Bacteria,4NQ0Z@976|Bacteroidetes,2FSHB@200643|Bacteroidia,231KU@171551|Porphyromonadaceae	976|Bacteroidetes	K	ECF sigma factor	NA	Sigma70_r2,Sigma70_r4_2
7.57612	0.323905	0.220448	1.46931	0.141749	0.299435	597360	597968	608	-	hypothetical protein	1235803.C825_02049	1.21e-143	405	COG0776@1|root,COG0776@2|Bacteria,4P464@976|Bacteroidetes,2FQHZ@200643|Bacteroidia	976|Bacteroidetes	L	Psort location Cytoplasmic, score 8.96	NA	Bac_DNA_binding
8.69861	1.30243	0.214834	6.06248	1.34037e-09	5.93196e-08	598294	599637	1343	+	hypothetical protein	1235803.C825_02050	0	912	COG0793@1|root,COG0793@2|Bacteria,4NN0C@976|Bacteroidetes	976|Bacteroidetes	M	peptidase S41	NA	Peptidase_S41
8.51919	0.996848	0.193916	5.14061	2.73847e-07	6.78913e-06	599967	603458	3491	+	HTH-type transcriptional activator RhaR	1235803.C825_02051	0	2306	COG0745@1|root,COG3292@1|root,COG5002@1|root,COG0745@2|Bacteria,COG3292@2|Bacteria,COG5002@2|Bacteria	2|Bacteria	T	protein histidine kinase activity	NA	GAF,HAMP,HATPase_c,HTH_18,HisKA,PAS_4,Reg_prop,Response_reg,Y_Y_Y
7.69779	0.202357	0.154748	1.30765	0.190992	0.370701	603508	605346	1838	-	hypothetical protein	1235803.C825_02052	0	1246	COG4198@1|root,COG4198@2|Bacteria,4P1EI@976|Bacteroidetes	976|Bacteroidetes	S	Starch-binding associating with outer membrane	NA	SusD-like_2
8.16929	0.438521	0.144264	3.03971	0.00236808	0.0139047	605359	608670	3311	-	TonB-dependent receptor SusC	1235803.C825_02053	0	2207	COG4206@1|root,COG4206@2|Bacteria,4NZWU@976|Bacteroidetes,2G065@200643|Bacteroidia	976|Bacteroidetes	P	TonB-linked outer membrane protein, SusC RagA family	NA	CarbopepD_reg_2,Plug,TonB_dep_Rec
8.53732	0.61368	0.224935	2.72825	0.00636706	0.0303882	608911	610587	1676	+	hypothetical protein	1235803.C825_02054	0	1107	COG1672@1|root,COG1672@2|Bacteria,4NIJ4@976|Bacteroidetes,2FM14@200643|Bacteroidia,22VXI@171551|Porphyromonadaceae	976|Bacteroidetes	S	Predicted AAA-ATPase	NA	AAA-ATPase_like,PDDEXK_9
10.7752	1.11037	0.276926	4.00964	6.08102e-05	0.000746877	611534	611680	146	+	hypothetical protein	NA	NA	NA	NA	NA	NA	NA	NA	NA
8.2467	0.675603	0.234799	2.87736	0.00401016	0.0208489	612467	613420	953	+	putative glycosyltransferase	1235803.C825_02056	1.28e-225	622	COG0463@1|root,COG0463@2|Bacteria,4NGGM@976|Bacteroidetes,2FMW6@200643|Bacteroidia,22Y10@171551|Porphyromonadaceae	976|Bacteroidetes	M	Glycosyl transferase family 2	NA	Glycos_transf_2
7.72174	0.687848	0.174828	3.93443	8.33939e-05	0.000958314	613446	614741	1295	+	hypothetical protein	1235803.C825_02057	1.63e-297	813	COG0457@1|root,COG0457@2|Bacteria,4NJEF@976|Bacteroidetes,2FS5G@200643|Bacteroidia,22ZDU@171551|Porphyromonadaceae	976|Bacteroidetes	S	Tetratricopeptide repeat	NA	PMT_2,TPR_1,TPR_16,TPR_2,TPR_8
6.72727	1.24052	0.335207	3.70075	0.000214964	0.00208161	614770	615174	404	+	hypothetical protein	1235803.C825_02060	1.16e-36	138	COG3391@1|root,COG3391@2|Bacteria,4NTPD@976|Bacteroidetes,2FVA9@200643|Bacteroidia,2317H@171551|Porphyromonadaceae	976|Bacteroidetes	S	6-bladed beta-propeller	NA	DUF5128
8.25623	1.41966	0.223191	6.36076	2.00763e-10	1.03374e-08	615269	616465	1196	+	hypothetical protein	1235803.C825_02059	2.29e-294	802	COG3391@1|root,COG3391@2|Bacteria,4NTPD@976|Bacteroidetes,2FVA9@200643|Bacteroidia,2317H@171551|Porphyromonadaceae	976|Bacteroidetes	S	6-bladed beta-propeller	NA	DUF5128
8.1534	1.38374	0.157451	8.78838	1.51738e-18	3.38566e-16	616581	618137	1556	+	hypothetical protein	1235803.C825_02060	0	1034	COG3391@1|root,COG3391@2|Bacteria,4NTPD@976|Bacteroidetes,2FVA9@200643|Bacteroidia,2317H@171551|Porphyromonadaceae	976|Bacteroidetes	S	6-bladed beta-propeller	NA	DUF5128
6.88682	0.6747	0.321698	2.09731	0.035966	0.111911	618159	618782	623	+	hypothetical protein	NA	NA	NA	NA	NA	NA	NA	NA	NA
8.08803	1.42132	0.156807	9.06414	1.25595e-19	3.6632e-17	618809	619486	677	+	hypothetical protein	1235803.C825_02062	7.78e-165	460	COG0681@1|root,COG0681@2|Bacteria,4NRG2@976|Bacteroidetes,2FTDJ@200643|Bacteroidia,22Y5E@171551|Porphyromonadaceae	976|Bacteroidetes	U	Belongs to the peptidase S26 family	NA	Peptidase_S24,Peptidase_S26
7.74147	0.837415	0.257374	3.25369	0.00113916	0.0077512	619775	620329	554	+	ECF RNA polymerase sigma factor SigM	1235803.C825_02063	2.2e-128	365	COG1595@1|root,COG1595@2|Bacteria,4NTD3@976|Bacteroidetes,2FUFT@200643|Bacteroidia,231E1@171551|Porphyromonadaceae	976|Bacteroidetes	K	Sigma-70, region 4	NA	Sigma70_r2,Sigma70_r4_2
8.01511	1.11848	0.148742	7.5196	5.4944e-14	5.16185e-12	620389	621582	1193	+	hypothetical protein	1235803.C825_02064	6.23e-287	783	COG3712@1|root,COG3712@2|Bacteria,4NJBJ@976|Bacteroidetes,2FQUN@200643|Bacteroidia,22ZI3@171551|Porphyromonadaceae	976|Bacteroidetes	PT	Domain of unknown function (DUF4974)	NA	DUF4974,FecR
8.15429	0.317454	0.193548	1.64018	0.100968	0.237862	621726	625118	3392	+	TonB-dependent receptor P26	1235803.C825_02065	0	2257	COG4206@1|root,COG4206@2|Bacteria,4P258@976|Bacteroidetes,2FWW6@200643|Bacteroidia,23270@171551|Porphyromonadaceae	976|Bacteroidetes	H	TonB-dependent Receptor Plug Domain	NA	CarbopepD_reg_2,Plug,TonB_dep_Rec
7.87159	0.548535	0.159198	3.44561	0.000569771	0.00442834	625138	627024	1886	+	hypothetical protein	1235803.C825_02066	0	1321	COG0614@1|root,COG0614@2|Bacteria,4NEXQ@976|Bacteroidetes,2G2NN@200643|Bacteroidia	976|Bacteroidetes	P	SusD family	NA	SusD-like_3,SusD_RagB
7.70173	0.454683	0.153882	2.95475	0.00312926	0.0174094	627061	628404	1343	+	hypothetical protein	1235803.C825_02067	0	885	COG3250@1|root,COG3250@2|Bacteria,4PI3P@976|Bacteroidetes,2G1I3@200643|Bacteroidia,230UX@171551|Porphyromonadaceae	976|Bacteroidetes	G	F5/8 type C domain	NA	F5_F8_type_C
7.73876	0.592375	0.254895	2.32399	0.0201258	0.072378	628529	629440	911	-	Arabinose operon regulatory protein	1235803.C825_02068	4.29e-226	622	COG2207@1|root,COG2207@2|Bacteria,4NGS3@976|Bacteroidetes,2FMQ2@200643|Bacteroidia,22WJF@171551|Porphyromonadaceae	976|Bacteroidetes	K	AraC-like ligand binding domain	NA	AraC_binding,HTH_18,HTH_AraC
7.79842	0.48641	0.157304	3.09216	0.00198709	0.0121471	629578	630951	1373	+	D-xylose-proton symporter	1235803.C825_02069	0	897	COG0477@1|root,COG2814@2|Bacteria,4NE09@976|Bacteroidetes,2G07R@200643|Bacteroidia,22WT4@171551|Porphyromonadaceae	976|Bacteroidetes	EGP	Sugar (and other) transporter	xylE	Sugar_tr
7.08812	0.241179	0.314462	0.766956	0.443108	0.643744	630962	631876	914	+	hypothetical protein	1235803.C825_02070	1.26e-190	560	COG0457@1|root,COG0457@2|Bacteria,4NIBU@976|Bacteroidetes,2FMSC@200643|Bacteroidia,22X4G@171551|Porphyromonadaceae	976|Bacteroidetes	S	Domain of unknown function (DUF5107)	NA	DUF5107,TPR_16,TPR_6,TPR_8
8.10512	0.161314	0.184661	0.873571	0.382352	0.589716	631906	634248	2342	+	hypothetical protein	1235803.C825_02070	0	1530	COG0457@1|root,COG0457@2|Bacteria,4NIBU@976|Bacteroidetes,2FMSC@200643|Bacteroidia,22X4G@171551|Porphyromonadaceae	976|Bacteroidetes	S	Domain of unknown function (DUF5107)	NA	DUF5107,TPR_16,TPR_6,TPR_8
8.07781	0.360967	0.167356	2.15688	0.0310149	0.100353	634417	637203	2786	+	Beta-galactosidase	1235803.C825_02071	0	1894	COG3250@1|root,COG3250@2|Bacteria,4NEP8@976|Bacteroidetes,2FMRW@200643|Bacteroidia,22ZAN@171551|Porphyromonadaceae	976|Bacteroidetes	G	Glycosyl hydrolases family 2	NA	Glyco_hydro_2,Glyco_hydro_2_C,Glyco_hydro_2_N
7.79375	0.0295369	0.197135	0.149831	0.880898	0.937815	637224	639368	2144	+	hypothetical protein	1235803.C825_02072	0	1485	COG3345@1|root,COG3345@2|Bacteria,4NHAT@976|Bacteroidetes,2FM30@200643|Bacteroidia,22WS0@171551|Porphyromonadaceae	976|Bacteroidetes	G	Glycosyl hydrolase family 36 C-terminal domain	NA	Glyco_hydro_36C,Glyco_hydro_36N,Melibiase
7.56619	0.583998	0.165299	3.53297	0.000410914	0.0034354	639372	640481	1109	+	Aldose 1-epimerase	1235803.C825_02073	7.67e-276	753	COG2017@1|root,COG2017@2|Bacteria,4NF5G@976|Bacteroidetes,2FMMZ@200643|Bacteroidia,22X1S@171551|Porphyromonadaceae	976|Bacteroidetes	G	Converts alpha-aldose to the beta-anomer	NA	Aldose_epim
7.62602	0.695314	0.244702	2.84147	0.00449055	0.0226391	640617	641972	1355	+	hypothetical protein	1235803.C825_02074	0	899	COG1373@1|root,COG1373@2|Bacteria,4NHQG@976|Bacteroidetes,2FNSN@200643|Bacteroidia,22WJB@171551|Porphyromonadaceae	976|Bacteroidetes	S	COGs COG1373 ATPase (AAA superfamily)	NA	AAA_14,DUF4143
7.25141	0.311091	0.277719	1.12016	0.262644	0.46045	642001	643170	1169	-	hypothetical protein	1235803.C825_02075	2.85e-288	786	COG3579@1|root,COG3579@2|Bacteria,4NE02@976|Bacteroidetes,2FPW0@200643|Bacteroidia,22WUF@171551|Porphyromonadaceae	976|Bacteroidetes	E	Papain family cysteine protease	NA	Peptidase_C1,Peptidase_C1_2
7.73254	-0.0636354	0.179455	-0.354603	0.722887	0.84245	643202	644812	1610	-	hypothetical protein	1235803.C825_02076	0	1088	COG4690@1|root,COG4690@2|Bacteria,4NEQE@976|Bacteroidetes,2FN3E@200643|Bacteroidia	976|Bacteroidetes	M	Dipeptidase	NA	Peptidase_C69
7.74583	-0.290381	0.17697	-1.64085	0.100829	0.237674	644919	646493	1574	+	Beta-hexosaminidase	1235803.C825_02077	0	1073	COG3525@1|root,COG3525@2|Bacteria,4NHSY@976|Bacteroidetes,2FPK5@200643|Bacteroidia,22Z51@171551|Porphyromonadaceae	976|Bacteroidetes	G	Glycosyl hydrolase family 20, catalytic domain	NA	Glyco_hydro_20,Glyco_hydro_20b
7.78924	0.0131408	0.148869	0.0882714	0.929661	0.963723	646562	648400	1838	-	ATP-dependent RNA helicase DeaD	1235803.C825_02078	0	1116	COG0513@1|root,COG0513@2|Bacteria,4NEJV@976|Bacteroidetes,2FMB6@200643|Bacteroidia,22W44@171551|Porphyromonadaceae	976|Bacteroidetes	L	Belongs to the DEAD box helicase family	NA	DEAD,DbpA,Helicase_C
7.37538	-0.373041	0.248522	-1.50104	0.133346	0.28828	648467	649525	1058	-	hypothetical protein	1235803.C825_02079	1.14e-257	706	COG2365@1|root,COG2365@2|Bacteria,4NMQ7@976|Bacteroidetes,2FMCH@200643|Bacteroidia,22XUN@171551|Porphyromonadaceae	976|Bacteroidetes	T	Tyrosine phosphatase family	NA	Y_phosphatase3
7.04543	0.11326	0.249343	0.454234	0.64966	0.794664	649602	650525	923	-	Fructokinase	1235803.C825_02080	9.04e-230	631	COG0524@1|root,COG0524@2|Bacteria,4NG11@976|Bacteroidetes,2FMAX@200643|Bacteroidia,22XEA@171551|Porphyromonadaceae	976|Bacteroidetes	G	pfkB family carbohydrate kinase	NA	PfkB
6.16806	-0.870805	0.590741	-1.47409	0.140457	0.297292	650545	651156	611	-	Arabinose 5-phosphate isomerase KdsD	1235803.C825_02081	5.71e-138	390	COG0794@1|root,COG0794@2|Bacteria,4NED8@976|Bacteroidetes,2FMXM@200643|Bacteroidia,22X6D@171551|Porphyromonadaceae	976|Bacteroidetes	M	Iron dicitrate transport regulator FecR	kdsD	CBS,SIS
8.2223	0.422485	0.179947	2.34783	0.0188832	0.0690236	651215	652009	794	-	Co-chaperone protein DjlA	1235803.C825_02082	1.96e-182	508	COG1076@1|root,COG1076@2|Bacteria,4NF1B@976|Bacteroidetes,2FQ12@200643|Bacteroidia,22XU9@171551|Porphyromonadaceae	976|Bacteroidetes	O	Tellurite resistance protein TerB	NA	DnaJ,TerB
8.66994	1.03594	0.171581	6.03763	1.56394e-09	6.75397e-08	652533	654221	1688	+	hypothetical protein	1235803.C825_02083	0	1055	COG0457@1|root,COG0457@2|Bacteria,4NFMG@976|Bacteroidetes,2FT4T@200643|Bacteroidia,22YK4@171551|Porphyromonadaceae	976|Bacteroidetes	K	Tetratricopeptide repeats	NA	GerE,TPR_10,TPR_12,TPR_19,TPR_7,TPR_8
6.68953	0.575298	0.661271	0.869988	0.384307	0.59239	654422	654796	374	+	hypothetical protein	NA	NA	NA	NA	NA	NA	NA	NA	NA
5.80814	2.42253	1.91419	1.26557	0.205669	0.389585	654808	655209	401	+	hypothetical protein	NA	NA	NA	NA	NA	NA	NA	NA	NA
8.42908	1.40351	0.196951	7.1262	1.03175e-12	8.00729e-11	655212	656945	1733	+	hypothetical protein	1235803.C825_02086	0	1131	2C4WC@1|root,32QY3@2|Bacteria,4P16T@976|Bacteroidetes,2FRU6@200643|Bacteroidia	976|Bacteroidetes	NA	NA	NA	MACPF
7.79904	1.55463	0.2396	6.48844	8.67318e-11	4.73928e-09	657146	657733	587	+	hypothetical protein	1235803.C825_02087	4.74e-133	377	2BR5Z@1|root,32K45@2|Bacteria,4NQM6@976|Bacteroidetes,2FT7N@200643|Bacteroidia,22Z2T@171551|Porphyromonadaceae	976|Bacteroidetes	NA	NA	NA	DUF4412
7.17384	1.23156	0.294987	4.17496	2.98036e-05	0.000405071	658025	658483	458	+	hypothetical protein	NA	NA	NA	NA	NA	NA	NA	NA	NA
8.22402	0.506087	0.170801	2.96303	0.00304631	0.0170282	658670	661552	2882	+	hypothetical protein	1235803.C825_02090	0	1902	COG0612@1|root,COG0612@2|Bacteria,4NFY0@976|Bacteroidetes,2FMCE@200643|Bacteroidia,22WW4@171551|Porphyromonadaceae	976|Bacteroidetes	S	Belongs to the peptidase M16 family	NA	Peptidase_M16,Peptidase_M16_C
8.04983	0.13535	0.170471	0.793975	0.42721	0.630223	661690	663237	1547	+	hypothetical protein	1235803.C825_02091	0	1043	COG1672@1|root,COG1672@2|Bacteria,4NIJ4@976|Bacteroidetes,2FM14@200643|Bacteroidia,22VXI@171551|Porphyromonadaceae	976|Bacteroidetes	S	Predicted AAA-ATPase	NA	AAA-ATPase_like,PDDEXK_9
7.69585	0.265492	0.187601	1.4152	0.15701	0.322883	663338	664558	1220	+	putative zinc protease	1235803.C825_02092	8.64e-294	801	COG0612@1|root,COG0612@2|Bacteria,4NEE4@976|Bacteroidetes,2FN50@200643|Bacteroidia,22WUV@171551|Porphyromonadaceae	976|Bacteroidetes	S	Belongs to the peptidase M16 family	NA	Peptidase_M16,Peptidase_M16_C
8.0823	-0.126768	0.168113	-0.754066	0.45081	0.650616	664648	666048	1400	-	Amino-acid carrier protein AlsT	1235803.C825_02093	0	885	COG1115@1|root,COG1115@2|Bacteria,4NDX7@976|Bacteroidetes,2FMFZ@200643|Bacteroidia,22XG3@171551|Porphyromonadaceae	976|Bacteroidetes	E	Psort location CytoplasmicMembrane, score 10.00	agcS	Na_Ala_symp
8.35001	0.500289	0.16205	3.08724	0.00202024	0.0123216	666557	668917	2360	+	hypothetical protein	1235803.C825_02094	0	1524	COG0577@1|root,COG0577@2|Bacteria,4NDUK@976|Bacteroidetes,2FN9Q@200643|Bacteroidia,22ZRB@171551|Porphyromonadaceae	976|Bacteroidetes	V	FtsX-like permease family	NA	FtsX,MacB_PCD
7.93782	0.215784	0.229825	0.938908	0.347778	0.553686	669062	669571	509	-	ECF RNA polymerase sigma factor SigR	1235803.C825_02095	1.58e-116	333	COG1595@1|root,COG1595@2|Bacteria,4NMM3@976|Bacteroidetes,2FNH5@200643|Bacteroidia,22XTV@171551|Porphyromonadaceae	976|Bacteroidetes	K	Belongs to the sigma-70 factor family. ECF subfamily	NA	Sigma70_r2,Sigma70_r4_2
8.02522	0.413125	0.168177	2.45648	0.0140304	0.0555306	669867	671072	1205	+	hypothetical protein	1235803.C825_02096	2.24e-284	792	COG1629@1|root,COG4771@2|Bacteria,4NFU8@976|Bacteroidetes,2G2FE@200643|Bacteroidia,22WQ8@171551|Porphyromonadaceae	976|Bacteroidetes	P	TonB-dependent receptor	NA	CarbopepD_reg_2,CarboxypepD_reg,OMP_b-brl_3
7.67236	0.165118	0.278439	0.593014	0.553172	0.729242	671234	672193	959	+	hypothetical protein	1235803.C825_02096	1.77e-231	654	COG1629@1|root,COG4771@2|Bacteria,4NFU8@976|Bacteroidetes,2G2FE@200643|Bacteroidia,22WQ8@171551|Porphyromonadaceae	976|Bacteroidetes	P	TonB-dependent receptor	NA	CarbopepD_reg_2,CarboxypepD_reg,OMP_b-brl_3
6.08994	0.674972	0.543877	1.24104	0.214592	0.400397	672234	672740	506	+	hypothetical protein	1235803.C825_02097	2.97e-125	355	COG1853@1|root,COG1853@2|Bacteria,4NNFP@976|Bacteroidetes,2FPWU@200643|Bacteroidia,22XVU@171551|Porphyromonadaceae	976|Bacteroidetes	S	Conserved protein domain typically associated with flavoprotein	NA	Flavin_Reduct
6.987	-0.235856	0.430106	-0.548368	0.583439	0.749598	672743	673510	767	-	hypothetical protein	1235803.C825_02098	1.19e-183	510	COG3910@1|root,COG3910@2|Bacteria,4NNW5@976|Bacteroidetes,2FTH4@200643|Bacteroidia,230A1@171551|Porphyromonadaceae	976|Bacteroidetes	S	AAA ATPase domain	NA	AAA_15,AAA_21,AAA_23
6.69586	0.926413	0.386221	2.39866	0.0164551	0.0622295	673548	674273	725	-	hypothetical protein	1235803.C825_02099	2.04e-168	471	COG1555@1|root,COG1555@2|Bacteria,4NK4K@976|Bacteroidetes,2FPCH@200643|Bacteroidia,22Y5J@171551|Porphyromonadaceae	976|Bacteroidetes	L	Helix-hairpin-helix motif	NA	HHH_3
3.89756	4.19792	3.00019	1.39922	0.161747	0.329839	674279	674614	335	-	hypothetical protein	1235803.C825_02100	3.51e-74	222	COG3668@1|root,COG3668@2|Bacteria	2|Bacteria	D	Plasmid stabilization system	NA	ParE_toxin
4.6462	-0.203745	1.8189	-0.112016	0.910811	0.954834	674587	674886	299	-	hypothetical protein	1121889.AUDM01000002_gene401	3.26e-05	45.4	2A2CX@1|root,30QPX@2|Bacteria,4PCX9@976|Bacteroidetes,1IDEW@117743|Flavobacteriia,2NY5S@237|Flavobacterium	976|Bacteroidetes	NA	NA	NA	NA
7.58037	0.0693921	0.183896	0.377344	0.705918	0.831486	674971	676341	1370	-	hypothetical protein	1235803.C825_02102	0	875	COG0733@1|root,COG0733@2|Bacteria,4NGQ5@976|Bacteroidetes,2FMVD@200643|Bacteroidia,22X4U@171551|Porphyromonadaceae	976|Bacteroidetes	P	Belongs to the sodium neurotransmitter symporter (SNF) (TC 2.A.22) family	NA	SNF
6.40088	-0.706211	0.478637	-1.47546	0.140088	0.296746	676364	677017	653	-	Lipoprotein-releasing system ATP-binding protein LolD	1235803.C825_02103	4.31e-149	420	COG1136@1|root,COG1136@2|Bacteria,4NGDU@976|Bacteroidetes,2FKZC@200643|Bacteroidia,22W92@171551|Porphyromonadaceae	976|Bacteroidetes	V	Part of the ABC transporter complex LolCDE involved in the translocation of lipoproteins, in an ATP-dependent manner	lolD	ABC_tran
7.12725	-0.6034	0.303423	-1.98864	0.0467408	0.13392	677023	677736	713	-	tRNA threonylcarbamoyladenosine dehydratase	1235803.C825_02104	5.24e-169	472	COG1179@1|root,COG1179@2|Bacteria,4NEKB@976|Bacteroidetes,2FMG4@200643|Bacteroidia,22XGU@171551|Porphyromonadaceae	976|Bacteroidetes	H	COGs COG1179 Dinucleotide-utilizing protein involved in molybdopterin and thiamine biosynthesis family 1	hypB	ThiF
7.88977	0.15067	0.175421	0.858904	0.390394	0.598948	677875	679839	1964	+	hypothetical protein	1235803.C825_02105	0	1342	COG3525@1|root,COG3525@2|Bacteria,4NFC5@976|Bacteroidetes,2FQ22@200643|Bacteroidia,22X8T@171551|Porphyromonadaceae	976|Bacteroidetes	G	Glycosyl hydrolase family 20, catalytic domain	NA	Glyco_hydro_20,Glyco_hydro_20b
-0.0103629	-2.85169	4.0268	-0.708177	0.478835	0.672479	679965	681623	1658	+	IS1182 family transposase ISBthe2	1235803.C825_02845	0	1064	COG3666@1|root,COG3666@2|Bacteria,4NEDD@976|Bacteroidetes,2FNIQ@200643|Bacteroidia,22WUY@171551|Porphyromonadaceae	976|Bacteroidetes	L	COG3666 Transposase and inactivated derivatives	NA	DDE_Tnp_1,DDE_Tnp_1_6,DUF772
8.0161	-0.00484562	0.179781	-0.0269529	0.978497	0.990025	681710	684712	3002	-	hypothetical protein	1235803.C825_02108	0	1989	COG0644@1|root,COG0644@2|Bacteria,4NR3F@976|Bacteroidetes,2G2WD@200643|Bacteroidia	976|Bacteroidetes	C	FAD dependent oxidoreductase	NA	FAD_oxidored,TAT_signal
7.95188	0.416287	0.174458	2.38617	0.0170247	0.0637532	684764	686767	2003	-	hypothetical protein	1235803.C825_02109	0	1358	COG2081@1|root,COG2081@2|Bacteria,4PMNY@976|Bacteroidetes,2FQ67@200643|Bacteroidia,22W1E@171551|Porphyromonadaceae	976|Bacteroidetes	S	FAD dependent oxidoreductase	NA	FAD_oxidored
7.67601	-0.523433	0.160946	-3.25223	0.00114504	0.00778134	686868	688706	1838	-	hypothetical protein	1235803.C825_02110	0	1261	COG1435@1|root,COG1435@2|Bacteria,4NFWU@976|Bacteroidetes,2FN5G@200643|Bacteroidia	976|Bacteroidetes	F	SusD family	NA	SusD-like_3,SusD_RagB
8.09148	0.126034	0.141544	0.89042	0.37324	0.580886	688721	692080	3359	-	TonB-dependent receptor P3	1235803.C825_02111	0	2209	COG1629@1|root,COG1629@2|Bacteria,4NIPG@976|Bacteroidetes,2FRQY@200643|Bacteroidia,22Z8M@171551|Porphyromonadaceae	976|Bacteroidetes	P	Secretin and TonB N terminus short domain	NA	CarbopepD_reg_2,Plug,TonB_dep_Rec
8.01629	0.900443	0.191745	4.69603	2.65261e-06	5.01509e-05	692259	693245	986	-	hypothetical protein	1235803.C825_02112	4.84e-231	636	COG3712@1|root,COG3712@2|Bacteria,4NMA2@976|Bacteroidetes,2FXKB@200643|Bacteroidia	976|Bacteroidetes	PT	Domain of unknown function (DUF4974)	NA	DUF4974,FecR
6.01619	0.298619	0.599093	0.498452	0.618165	0.773339	693329	693781	452	-	hypothetical protein	1235803.C825_02113	3.13e-104	309	COG3746@1|root,COG3746@2|Bacteria,4NNYC@976|Bacteroidetes,2G2K5@200643|Bacteroidia,22Y0E@171551|Porphyromonadaceae	976|Bacteroidetes	P	Phosphate-selective porin O and P	NA	Porin_O_P
8.2261	0.672158	0.195713	3.43441	0.000593849	0.00458222	693784	694458	674	-	hypothetical protein	1235803.C825_02113	3.42e-162	459	COG3746@1|root,COG3746@2|Bacteria,4NNYC@976|Bacteroidetes,2G2K5@200643|Bacteroidia,22Y0E@171551|Porphyromonadaceae	976|Bacteroidetes	P	Phosphate-selective porin O and P	NA	Porin_O_P
8.33807	0.97532	0.215358	4.52883	5.93112e-06	0.000103795	694931	695629	698	-	hypothetical protein	1235803.C825_02114	2.78e-157	442	COG1595@1|root,COG1595@2|Bacteria,4NR0P@976|Bacteroidetes,2FN1H@200643|Bacteroidia	976|Bacteroidetes	K	RNA polymerase sigma-70 factor	NA	Sigma70_r2,Sigma70_r4_2
8.00921	0.0403513	0.148957	0.270893	0.786473	0.884597	695681	697936	2255	+	hypothetical protein	1235803.C825_02115	0	1390	COG0306@1|root,COG0306@2|Bacteria,4NFCB@976|Bacteroidetes,2FN8Q@200643|Bacteroidia,22WHP@171551|Porphyromonadaceae	976|Bacteroidetes	U	Phosphate transporter	NA	PHO4
7.62186	-0.14676	0.227832	-0.644161	0.519471	0.702822	698102	698983	881	-	hypothetical protein	1235803.C825_02116	2.97e-212	586	28IAJ@1|root,2Z8D5@2|Bacteria,4NJNA@976|Bacteroidetes,2FQ8K@200643|Bacteroidia,22WD2@171551|Porphyromonadaceae	976|Bacteroidetes	NA	NA	NA	NA
7.59018	0.338845	0.211874	1.59927	0.10976	0.251242	699110	700516	1406	+	hypothetical protein	1235803.C825_02117	0	903	2C31A@1|root,2Z7UP@2|Bacteria,4NECU@976|Bacteroidetes,2FPEI@200643|Bacteroidia,22VWH@171551|Porphyromonadaceae	976|Bacteroidetes	S	Psort location CytoplasmicMembrane, score 10.00	NA	NA
6.88906	-0.389297	0.303236	-1.28381	0.199209	0.380988	700547	701329	782	+	Phosphonoacetaldehyde hydrolase	1235803.C825_02118	2.82e-189	525	COG0637@1|root,COG0637@2|Bacteria,4NIYB@976|Bacteroidetes,2FM33@200643|Bacteroidia,22WA4@171551|Porphyromonadaceae	976|Bacteroidetes	S	Belongs to the HAD-like hydrolase superfamily. PhnX family	phnX	HAD_2
7.69799	0.104974	0.229274	0.457853	0.647058	0.79302	701358	702449	1091	+	2-aminoethylphosphonate--pyruvate transaminase	1235803.C825_02119	2.45e-269	736	COG0075@1|root,COG0075@2|Bacteria,4NH61@976|Bacteroidetes,2FP5I@200643|Bacteroidia,22X2A@171551|Porphyromonadaceae	976|Bacteroidetes	E	Belongs to the class-V pyridoxal-phosphate-dependent aminotransferase family. PhnW subfamily	phnW	Aminotran_5
5.94067	-1.59079	0.995217	-1.59843	0.109946	0.2515	702699	702974	275	+	DNA-binding protein HU	1235803.C825_02120	5.78e-57	177	COG0776@1|root,COG0776@2|Bacteria	2|Bacteria	L	regulation of translation	NA	Bac_DNA_binding
6.58511	-1.0024	0.353789	-2.83332	0.00460666	0.0231278	702978	703604	626	-	hypothetical protein	1235803.C825_02121	2e-154	432	COG0224@1|root,COG0224@2|Bacteria,4NM5H@976|Bacteroidetes,2FNPU@200643|Bacteroidia,22XN5@171551|Porphyromonadaceae	976|Bacteroidetes	C	WbqC-like protein	NA	WbqC
6.36477	-0.475581	0.463018	-1.02713	0.304358	0.508213	703607	704464	857	-	hypothetical protein	1235803.C825_02122	1.72e-207	573	COG0681@1|root,COG0681@2|Bacteria,4NQT3@976|Bacteroidetes,2FPB0@200643|Bacteroidia,22YM4@171551|Porphyromonadaceae	976|Bacteroidetes	U	Belongs to the peptidase S26 family	lepB_1	Peptidase_S24
7.44515	0.172779	0.23533	0.734197	0.462829	0.660129	704470	705867	1397	-	hypothetical protein	1235803.C825_02123	0	979	COG0681@1|root,COG0681@2|Bacteria,4NFTP@976|Bacteroidetes,2FNMS@200643|Bacteroidia,22W4M@171551|Porphyromonadaceae	976|Bacteroidetes	U	Belongs to the peptidase S26 family	lepB	Peptidase_S24,Peptidase_S26
6.94974	-0.312763	0.31274	-1.00007	0.317276	0.522452	705886	706602	716	-	4-hydroxy-tetrahydrodipicolinate reductase	1235803.C825_02124	4.84e-170	474	COG0289@1|root,COG0289@2|Bacteria,4NDX2@976|Bacteroidetes,2FNUW@200643|Bacteroidia,22VX2@171551|Porphyromonadaceae	976|Bacteroidetes	E	Belongs to the DapB family	dapB	DapB_C,DapB_N
7.62289	0.20451	0.227634	0.898417	0.368963	0.576371	706713	707990	1277	+	hypothetical protein	1235803.C825_02125	0	878	28HQ3@1|root,2Z7XW@2|Bacteria,4NF9H@976|Bacteroidetes,2FPMP@200643|Bacteroidia,22VUD@171551|Porphyromonadaceae	976|Bacteroidetes	S	Protein of unknown function (DUF2851)	NA	DUF2851
7.71567	-0.301989	0.189131	-1.59671	0.110329	0.251946	708078	709997	1919	+	hypothetical protein	1235803.C825_02126	0	1263	COG4704@1|root,COG4704@2|Bacteria,4NGPF@976|Bacteroidetes,2FNAC@200643|Bacteroidia,22WR4@171551|Porphyromonadaceae	976|Bacteroidetes	S	Bacterial Ig-like domain	NA	Big_5,fn3_3
6.48413	-0.978132	0.388354	-2.51866	0.0117803	0.048713	710026	710820	794	+	hypothetical protein	1235803.C825_02127	2.17e-189	525	COG3170@1|root,COG3170@2|Bacteria,4NF47@976|Bacteroidetes,2FNVH@200643|Bacteroidia,22YEF@171551|Porphyromonadaceae	976|Bacteroidetes	NU	Protein of unknown function (DUF3108)	NA	DUF3108
7.07499	-0.589972	0.363803	-1.62168	0.104871	0.244381	710789	711868	1079	-	Adaptive-response sensory-kinase SasA	1235803.C825_02128	1.94e-248	683	COG5000@1|root,COG5000@2|Bacteria,4NEWF@976|Bacteroidetes,2FN85@200643|Bacteroidia	976|Bacteroidetes	T	COG5000 Signal transduction histidine kinase involved in nitrogen fixation and metabolism regulation	NA	HATPase_c,PAS_8
7.65274	-0.46562	0.183513	-2.53726	0.0111723	0.046887	711865	713214	1349	-	Transcriptional regulatory protein ZraR	1235803.C825_02129	1.85e-305	862	COG2204@1|root,COG2204@2|Bacteria,4NE89@976|Bacteroidetes,2FMRV@200643|Bacteroidia,22W60@171551|Porphyromonadaceae	976|Bacteroidetes	T	COG2204 Response regulator containing CheY-like receiver AAA-type ATPase and DNA-binding domains	NA	HTH_8,Response_reg,Sigma54_activat
7.79174	-0.305063	0.190376	-1.60242	0.109062	0.250441	713528	714922	1394	+	hypothetical protein	1235803.C825_02130	0	889	COG1538@1|root,COG1538@2|Bacteria,4NJ4M@976|Bacteroidetes,2FN0S@200643|Bacteroidia,22WDV@171551|Porphyromonadaceae	976|Bacteroidetes	MU	Outer membrane efflux protein	NA	OEP
7.32918	-0.0230213	0.211006	-0.109103	0.913121	0.955517	714950	716197	1247	+	Multidrug resistance protein MdtA	1235803.C825_02131	2.32e-266	733	COG0845@1|root,COG0845@2|Bacteria,4NDUH@976|Bacteroidetes,2FM9Q@200643|Bacteroidia,22W2T@171551|Porphyromonadaceae	976|Bacteroidetes	M	Belongs to the membrane fusion protein (MFP) (TC 8.A.1) family	NA	Biotin_lipoyl_2,HlyD_3,HlyD_D23
7.83128	-0.346124	0.179626	-1.92692	0.0539897	0.148798	716212	718617	2405	+	hypothetical protein	1235803.C825_02132	0	1561	COG0577@1|root,COG0577@2|Bacteria,4NDUK@976|Bacteroidetes,2FP64@200643|Bacteroidia,231FQ@171551|Porphyromonadaceae	976|Bacteroidetes	V	MacB-like periplasmic core domain	NA	FtsX,MacB_PCD
6.71681	-0.602892	0.32485	-1.85591	0.0634665	0.168998	718635	719309	674	+	putative ABC transporter ATP-binding protein YknY	1235803.C825_02133	1.68e-154	434	COG1136@1|root,COG1136@2|Bacteria,4NFDW@976|Bacteroidetes,2FNWN@200643|Bacteroidia,231SS@171551|Porphyromonadaceae	976|Bacteroidetes	V	ATPases associated with a variety of cellular activities	NA	ABC_tran
8.03511	-0.152101	0.167427	-0.908459	0.363636	0.570712	719399	721807	2408	+	hypothetical protein	1235803.C825_02134	0	1569	COG0577@1|root,COG0577@2|Bacteria,4NDUK@976|Bacteroidetes,2FN9Q@200643|Bacteroidia,22Z9G@171551|Porphyromonadaceae	976|Bacteroidetes	V	MacB-like periplasmic core domain	NA	FtsX,MacB_PCD
6.55058	-0.214753	0.445176	-0.4824	0.629522	0.781072	721939	722346	407	-	Acyl-coenzyme A thioesterase PaaI	1235803.C825_02135	2.09e-91	267	COG2050@1|root,COG2050@2|Bacteria,4NM7W@976|Bacteroidetes,2FS5M@200643|Bacteroidia,22YUF@171551|Porphyromonadaceae	976|Bacteroidetes	Q	Thioesterase superfamily	paaI	4HBT
7.61551	-0.108198	0.187403	-0.577351	0.563703	0.736406	722433	723908	1475	-	Cysteine--tRNA ligase	1235803.C825_02136	0	1012	COG0215@1|root,COG0215@2|Bacteria,4NE3Y@976|Bacteroidetes,2FM9D@200643|Bacteroidia,22WDE@171551|Porphyromonadaceae	976|Bacteroidetes	J	Belongs to the class-I aminoacyl-tRNA synthetase family	cysS	DALR_2,tRNA-synt_1e
5.68755	-1.27926	0.712955	-1.79431	0.0727635	0.186832	723995	724405	410	-	hypothetical protein	1235803.C825_02137	1.25e-97	283	COG0735@1|root,COG0735@2|Bacteria,4NQND@976|Bacteroidetes,2FS2D@200643|Bacteroidia,22Y4N@171551|Porphyromonadaceae	976|Bacteroidetes	P	Belongs to the Fur family	NA	FUR
7.77981	0.0568913	0.17603	0.323191	0.746551	0.859368	724407	726377	1970	-	Cadmium, zinc and cobalt-transporting ATPase	1235803.C825_02138	0	1263	COG2217@1|root,COG2217@2|Bacteria,4NERS@976|Bacteroidetes,2FP0P@200643|Bacteroidia,22WFG@171551|Porphyromonadaceae	976|Bacteroidetes	P	cadmium-exporting ATPase	cadA	E1-E2_ATPase,Hydrolase
7.72715	-0.308088	0.182139	-1.6915	0.0907413	0.221308	726488	728314	1826	+	Alpha-1,3-galactosidase B	1235803.C825_02139	0	1254	COG5434@1|root,COG5434@2|Bacteria,4NDWX@976|Bacteroidetes,2FMZA@200643|Bacteroidia,22X8E@171551|Porphyromonadaceae	976|Bacteroidetes	M	Parallel beta-helix repeats	glaB	Beta_helix
7.93219	-0.00840848	0.156457	-0.0537432	0.95714	0.979764	728353	730539	2186	-	Sensor histidine kinase RcsC	1122931.AUAE01000009_gene4864	0	1174	COG0642@1|root,COG2205@2|Bacteria,4PMPZ@976|Bacteroidetes	976|Bacteroidetes	T	signal transduction histidine kinase	NA	HATPase_c,HisKA,PAS_3,PAS_4,PAS_9
7.52363	-0.00713256	0.311221	-0.022918	0.981716	0.990595	730666	731502	836	-	hypothetical protein	1235803.C825_02141	1.58e-204	565	COG3015@1|root,COG3187@1|root,COG3015@2|Bacteria,COG3187@2|Bacteria,4NWRF@976|Bacteroidetes,2FNPG@200643|Bacteroidia,22XMT@171551|Porphyromonadaceae	976|Bacteroidetes	O	lipoprotein NlpE involved in copper resistance	NA	NA
7.0176	-0.264584	0.251979	-1.05002	0.293708	0.496814	731616	732377	761	+	hypothetical protein	1235803.C825_02142	5.05e-184	511	COG0671@1|root,COG0671@2|Bacteria,4NJEX@976|Bacteroidetes,2G39P@200643|Bacteroidia,22XX7@171551|Porphyromonadaceae	976|Bacteroidetes	I	Acid phosphatase homologues	NA	PAP2
7.45579	-0.0684458	0.208959	-0.327557	0.743247	0.856994	732381	733937	1556	-	hypothetical protein	1235803.C825_02143	0	1050	COG1541@1|root,COG1541@2|Bacteria,4NFRI@976|Bacteroidetes,2FMJX@200643|Bacteroidia,22WCF@171551|Porphyromonadaceae	976|Bacteroidetes	H	GH3 auxin-responsive promoter	NA	GH3
6.89212	-0.293973	0.338224	-0.869165	0.384757	0.592472	733983	734996	1013	+	ATP-dependent 6-phosphofructokinase 2	1235803.C825_02144	1.31e-244	671	COG0205@1|root,COG0205@2|Bacteria,4NGN7@976|Bacteroidetes,2FNIF@200643|Bacteroidia,22X1H@171551|Porphyromonadaceae	976|Bacteroidetes	G	Catalyzes the phosphorylation of D-fructose 6-phosphate to fructose 1,6-bisphosphate by ATP, the first committing step of glycolysis	pfkA	PFK
6.94515	-0.114794	0.338506	-0.339118	0.734521	0.851008	735001	735915	914	-	Ribonuclease 3	1235803.C825_02145	8.87e-215	593	COG0571@1|root,COG0571@2|Bacteria,4NE0N@976|Bacteroidetes,2FMV3@200643|Bacteroidia,22W54@171551|Porphyromonadaceae	976|Bacteroidetes	J	Digests double-stranded RNA. Involved in the processing of primary rRNA transcript to yield the immediate precursors to the large and small rRNAs (23S and 16S). Processes some mRNAs, and tRNAs when they are encoded in the rRNA operon. Processes pre- crRNA and tracrRNA of type II CRISPR loci if present in the organism	rnc	Ribonucleas_3_3,dsrm
7.34392	-0.318182	0.239459	-1.32875	0.18393	0.361448	735917	737182	1265	-	3-oxoacyl-[acyl-carrier-protein] synthase 2	1235803.C825_02146	6.69e-301	821	COG0304@1|root,COG0304@2|Bacteria,4NEKC@976|Bacteroidetes,2FNDB@200643|Bacteroidia,22W73@171551|Porphyromonadaceae	976|Bacteroidetes	I	Catalyzes the condensation reaction of fatty acid synthesis by the addition to an acyl acceptor of two carbons from malonyl-ACP	fabF	Ketoacyl-synt_C,ketoacyl-synt
5.68735	0.225369	1.11023	0.202994	0.83914	0.913518	737204	737440	236	-	Acyl carrier protein	1235803.C825_02147	1.24e-43	142	COG0236@1|root,COG0236@2|Bacteria,4NS6C@976|Bacteroidetes,2FTWG@200643|Bacteroidia,22YF4@171551|Porphyromonadaceae	976|Bacteroidetes	IQ	Carrier of the growing fatty acid chain in fatty acid biosynthesis	acpP	PP-binding
7.14596	-0.386701	0.259133	-1.49229	0.135624	0.291205	737595	738158	563	+	Phosphoribosylglycinamide formyltransferase	1235803.C825_02148	7.08e-131	371	COG0299@1|root,COG0299@2|Bacteria,4NNZP@976|Bacteroidetes,2FPNN@200643|Bacteroidia,22XY4@171551|Porphyromonadaceae	976|Bacteroidetes	F	Catalyzes the transfer of a formyl group from 10- formyltetrahydrofolate to 5-phospho-ribosyl-glycinamide (GAR), producing 5-phospho-ribosyl-N-formylglycinamide (FGAR) and tetrahydrofolate	purN	Formyl_trans_N
7.95952	-0.242824	0.173015	-1.40348	0.160472	0.327738	738237	741050	2813	-	Vitamin B12 transporter BtuB	1235803.C825_02149	0	1867	COG1629@1|root,COG4771@2|Bacteria,4PMUZ@976|Bacteroidetes,2FMM0@200643|Bacteroidia,22ZTD@171551|Porphyromonadaceae	976|Bacteroidetes	P	TonB dependent receptor	NA	CarbopepD_reg_2,Plug,TonB_dep_Rec
7.63043	0.0975899	0.230798	0.422836	0.672415	0.810439	741069	742247	1178	-	hypothetical protein	1235803.C825_02150	8.15e-285	778	2EZVJ@1|root,33T03@2|Bacteria,4NZUJ@976|Bacteroidetes,2FQB0@200643|Bacteroidia	976|Bacteroidetes	S	Domain of unknown function (DUF4925)	NA	DUF4925
5.5987	-0.369517	2.79211	-0.132343	0.894713	0.944613	742451	742624	173	+	hypothetical protein	NA	NA	NA	NA	NA	NA	NA	NA	NA
7.21382	-0.639373	0.249972	-2.55778	0.0105344	0.0448827	742661	743902	1241	+	O-mycaminosyltylonolide 6-deoxyallosyltransferase	1235803.C825_02152	1.41e-305	837	COG1819@1|root,COG1819@2|Bacteria,4NHMR@976|Bacteroidetes,2FTZ7@200643|Bacteroidia,2310M@171551|Porphyromonadaceae	976|Bacteroidetes	CG	UDP-glucoronosyl and UDP-glucosyl transferase	NA	Glyco_transf_28,UDPGT
7.32824	-0.0202176	0.268298	-0.0753551	0.939932	0.968508	743911	745110	1199	-	Staphylopine export protein	1235803.C825_02153	8.5e-286	781	COG0477@1|root,COG2814@2|Bacteria,4NE7F@976|Bacteroidetes,2FQAA@200643|Bacteroidia,22VYY@171551|Porphyromonadaceae	976|Bacteroidetes	EGP	Major Facilitator Superfamily	NA	MFS_1,MFS_1_like,Sugar_tr
7.43281	-0.0658987	0.207348	-0.317817	0.750623	0.862018	745133	746236	1103	-	Erythronate-4-phosphate dehydrogenase	1235803.C825_02154	8.57e-272	743	COG0111@1|root,COG0111@2|Bacteria,4NGEB@976|Bacteroidetes,2FMMV@200643|Bacteroidia,22X0T@171551|Porphyromonadaceae	976|Bacteroidetes	H	Catalyzes the oxidation of erythronate-4-phosphate to 3- hydroxy-2-oxo-4-phosphonooxybutanoate	pdxB	2-Hacid_dh,2-Hacid_dh_C,DUF3410
7.11197	-0.574837	0.317499	-1.81052	0.0702157	0.181896	746386	746991	605	+	hypothetical protein	1235803.C825_02155	3.74e-142	401	COG0463@1|root,COG0463@2|Bacteria,4NGJK@976|Bacteroidetes,2FM49@200643|Bacteroidia,22X83@171551|Porphyromonadaceae	976|Bacteroidetes	M	Protein of unknown function (DUF4254)	NA	DUF4254
8.39019	0.251914	0.211661	1.19018	0.233976	0.425448	747058	747531	473	+	hypothetical protein	1235803.C825_02156	1.97e-111	320	2AUVQ@1|root,2ZI4I@2|Bacteria,4P3AZ@976|Bacteroidetes,2FVAW@200643|Bacteroidia	976|Bacteroidetes	NA	NA	NA	NA
7.98565	-0.133871	0.205751	-0.650648	0.515274	0.70031	748330	749355	1025	+	hypothetical protein	1235803.C825_02157	4.59e-247	678	COG0859@1|root,COG0859@2|Bacteria,4NEPH@976|Bacteroidetes,2FMP7@200643|Bacteroidia,22XC7@171551|Porphyromonadaceae	976|Bacteroidetes	M	glycosyl transferase family	NA	Glyco_transf_9
7.82012	1.32416	0.205061	6.45738	1.06533e-10	5.76244e-09	749355	750059	704	+	hypothetical protein	1235803.C825_02158	6.15e-171	476	COG0515@1|root,COG0515@2|Bacteria,4PMF4@976|Bacteroidetes,2G0DX@200643|Bacteroidia,23244@171551|Porphyromonadaceae	976|Bacteroidetes	KLT	Lipopolysaccharide kinase (Kdo/WaaP) family	NA	Glycos_transf_2,Kdo
8.95712	1.19442	0.265375	4.50086	6.76778e-06	0.000115787	750309	751004	695	+	hypothetical protein	NA	NA	NA	NA	NA	NA	NA	NA	NA
8.26908	0.861959	0.286037	3.01345	0.00258298	0.014905	752127	752399	272	+	hypothetical protein	NA	NA	NA	NA	NA	NA	NA	NA	NA
7.07953	0.58058	0.290773	1.99668	0.0458603	0.132342	752425	753180	755	-	hypothetical protein	1235803.C825_02161	6.67e-188	521	2F8QP@1|root,3412Y@2|Bacteria,4P4KE@976|Bacteroidetes	976|Bacteroidetes	NA	NA	NA	NA
6.62392	0.673872	0.356207	1.8918	0.0585178	0.158745	753189	753962	773	-	hypothetical protein	1235803.C825_02162	2.33e-191	530	COG1216@1|root,COG1216@2|Bacteria,4PKBZ@976|Bacteroidetes,2FQDS@200643|Bacteroidia,22YTR@171551|Porphyromonadaceae	976|Bacteroidetes	S	Glycosyl transferase family 2	NA	Glycos_transf_2,Glyphos_transf
6.92922	0.035865	0.385262	0.0930925	0.92583	0.961936	753969	754736	767	-	hypothetical protein	1235803.C825_02163	6.67e-190	526	28JAC@1|root,2Z956@2|Bacteria,4NPKM@976|Bacteroidetes,2FSIK@200643|Bacteroidia,22XWZ@171551|Porphyromonadaceae	976|Bacteroidetes	NA	NA	NA	NA
7.62666	0.0980663	0.190471	0.514862	0.606649	0.765459	754836	756128	1292	+	UDP-N-acetyl-D-glucosamine 6-dehydrogenase	1235803.C825_02164	0	865	COG0677@1|root,COG0677@2|Bacteria,4NDTW@976|Bacteroidetes,2FMXE@200643|Bacteroidia,22W6E@171551|Porphyromonadaceae	976|Bacteroidetes	M	Belongs to the UDP-glucose GDP-mannose dehydrogenase family	NA	UDPG_MGDP_dh,UDPG_MGDP_dh_C,UDPG_MGDP_dh_N
7.04977	0.155127	0.286426	0.541594	0.588098	0.752448	756150	757010	860	+	hypothetical protein	1235803.C825_02165	4.27e-222	610	2C23X@1|root,31G7W@2|Bacteria,4PNTX@976|Bacteroidetes,2FT9Q@200643|Bacteroidia,22YCA@171551|Porphyromonadaceae	976|Bacteroidetes	NA	NA	NA	NA
6.79671	0.199563	0.334817	0.596036	0.551151	0.728813	757038	757673	635	-	Ribonuclease H	1235803.C825_02166	6.95e-152	426	COG0328@1|root,COG3341@1|root,COG0328@2|Bacteria,COG3341@2|Bacteria,4NI01@976|Bacteroidetes,2FMEU@200643|Bacteroidia,22XM6@171551|Porphyromonadaceae	976|Bacteroidetes	L	Ribonuclease H	rnhA	Cauli_VI,RNase_H
6.25157	-0.685466	0.628766	-1.09018	0.275635	0.475524	757787	758308	521	+	Shikimate kinase	1235803.C825_02167	5.49e-119	340	COG0703@1|root,COG0703@2|Bacteria,4NQ73@976|Bacteroidetes,2FM3K@200643|Bacteroidia,22Y40@171551|Porphyromonadaceae	976|Bacteroidetes	F	Catalyzes the specific phosphorylation of the 3-hydroxyl group of shikimic acid using ATP as a cosubstrate	aroK	SKI
7.58839	-0.0930553	0.184481	-0.504417	0.613969	0.770518	758355	759566	1211	+	Alanine dehydrogenase	1235803.C825_02168	6.72e-285	779	COG0686@1|root,COG0686@2|Bacteria,4NE8F@976|Bacteroidetes,2FP71@200643|Bacteroidia,22XBI@171551|Porphyromonadaceae	976|Bacteroidetes	E	Alanine dehydrogenase/PNT, N-terminal domain	ald	AlaDh_PNT_C,AlaDh_PNT_N
7.64815	-0.529806	0.191231	-2.7705	0.00559698	0.0272224	759654	761507	1853	+	2-oxoglutarate oxidoreductase subunit KorA	1235803.C825_02169	0	1229	COG0674@1|root,COG1014@1|root,COG0674@2|Bacteria,COG1014@2|Bacteria,4NEP3@976|Bacteroidetes,2FN08@200643|Bacteroidia,22WBU@171551|Porphyromonadaceae	976|Bacteroidetes	C	2-oxoacid acceptor oxidoreductase, alpha subunit	porA	PFOR_II,POR,POR_N
7.34389	-0.127133	0.255202	-0.498166	0.618367	0.773339	761511	762521	1010	+	2-oxoglutarate oxidoreductase subunit KorB	1235803.C825_02170	3.37e-251	688	COG1013@1|root,COG1013@2|Bacteria,4NIE0@976|Bacteroidetes,2FME7@200643|Bacteroidia,22VVU@171551|Porphyromonadaceae	976|Bacteroidetes	C	ferredoxin oxidoreductase subunit beta	oorB	TPP_enzyme_C
7.85181	0.30516	0.186878	1.63294	0.102482	0.240698	762645	763847	1202	+	hypothetical protein	1235803.C825_02171	3.07e-284	777	COG3712@1|root,COG3712@2|Bacteria,4NJBJ@976|Bacteroidetes,2FQUN@200643|Bacteroidia,22YHT@171551|Porphyromonadaceae	976|Bacteroidetes	PT	Domain of unknown function (DUF4974)	NA	DUF4974,FecR
8.06589	-0.0676563	0.171719	-0.393995	0.693584	0.822623	764043	767399	3356	+	TonB-dependent receptor P26	1235803.C825_02172	0	2249	COG4206@1|root,COG4206@2|Bacteria,4P258@976|Bacteroidetes,2FWW6@200643|Bacteroidia,23270@171551|Porphyromonadaceae	976|Bacteroidetes	H	TonB-dependent Receptor Plug Domain	NA	CarbopepD_reg_2,Plug,TonB_dep_Rec
7.70509	-0.0264775	0.157786	-0.167807	0.866735	0.930153	767411	769267	1856	+	hypothetical protein	1235803.C825_02173	0	1280	COG0614@1|root,COG0614@2|Bacteria,4NEXQ@976|Bacteroidetes,2G2NN@200643|Bacteroidia,231TG@171551|Porphyromonadaceae	976|Bacteroidetes	P	Pfam:SusD	NA	SusD-like_3,SusD_RagB
7.43024	-0.14832	0.257602	-0.575771	0.56477	0.736567	769283	770692	1409	+	hypothetical protein	1235803.C825_02174	0	954	2B2WM@1|root,31VH6@2|Bacteria,4NQX9@976|Bacteroidetes,2FUQT@200643|Bacteroidia	976|Bacteroidetes	S	F5/8 type C domain	NA	DUF1735,F5_F8_type_C
7.29607	0.0394448	0.250222	0.157639	0.874741	0.934604	770704	772044	1340	+	Inositol 2-dehydrogenase/D-chiro-inositol 3-dehydrogenase	1235803.C825_02175	0	907	COG0673@1|root,COG0673@2|Bacteria,4NF4Q@976|Bacteroidetes,2FXCB@200643|Bacteroidia,22ZH7@171551|Porphyromonadaceae	976|Bacteroidetes	S	Oxidoreductase family, NAD-binding Rossmann fold	NA	GFO_IDH_MocA
6.74484	0.0160522	0.310518	0.0516948	0.958772	0.980562	772066	772758	692	+	hypothetical protein	1235803.C825_02176	4.33e-169	471	COG1413@1|root,COG1413@2|Bacteria,4NEZ7@976|Bacteroidetes,2FPRF@200643|Bacteroidia,22X0G@171551|Porphyromonadaceae	976|Bacteroidetes	C	Domain of Unknown Function (DUF1080)	NA	DUF1080
8.04375	0.514287	0.210802	2.43967	0.0147006	0.0574858	772826	773446	620	-	hypothetical protein	1235803.C825_02177	5.49e-142	401	COG1595@1|root,COG1595@2|Bacteria,4NVCP@976|Bacteroidetes,2FTBY@200643|Bacteroidia,22YK6@171551|Porphyromonadaceae	976|Bacteroidetes	K	Sigma-70, region 4	NA	Sigma70_r2,Sigma70_r4_2
7.75083	-0.504914	0.18385	-2.74633	0.00602659	0.0290742	773810	775417	1607	+	Phosphoenolpyruvate carboxykinase (ATP)	1235803.C825_02178	0	1078	COG1866@1|root,COG1866@2|Bacteria,4NEGI@976|Bacteroidetes,2FNYK@200643|Bacteroidia,22VYR@171551|Porphyromonadaceae	976|Bacteroidetes	H	Involved in the gluconeogenesis. Catalyzes the conversion of oxaloacetate (OAA) to phosphoenolpyruvate (PEP) through direct phosphoryl transfer between the nucleoside triphosphate and OAA	pckA	PEPCK_ATP
7.37222	-0.41422	0.271272	-1.52695	0.126772	0.277329	775599	776702	1103	+	Thiol-disulfide oxidoreductase ResA	1235803.C825_02180	2.42e-262	719	COG0526@1|root,COG0526@2|Bacteria,4NRAI@976|Bacteroidetes,2FSX6@200643|Bacteroidia,22YDF@171551|Porphyromonadaceae	976|Bacteroidetes	CO	Domain of unknown function (DUF4369)	NA	AhpC-TSA,DUF4369,Thioredoxin_8
7.52885	-0.655448	0.198474	-3.30243	0.000958502	0.00677147	776741	778279	1538	+	Competence protein ComM	1235803.C825_02181	0	992	COG0606@1|root,COG0606@2|Bacteria,4NE0G@976|Bacteroidetes,2FMHE@200643|Bacteroidia,22W0Y@171551|Porphyromonadaceae	976|Bacteroidetes	O	magnesium chelatase	comM	ChlI,Mg_chelatase,Mg_chelatase_C
7.63006	-0.803495	0.183768	-4.37234	1.22923e-05	0.000195327	778323	780362	2039	+	Methionine--tRNA ligase	1235803.C825_02182	0	1382	COG0073@1|root,COG0143@1|root,COG0073@2|Bacteria,COG0143@2|Bacteria,4NECB@976|Bacteroidetes,2FNV6@200643|Bacteroidia,22WAM@171551|Porphyromonadaceae	976|Bacteroidetes	J	Is required not only for elongation of protein synthesis but also for the initiation of all mRNA translation through initiator tRNA(fMet) aminoacylation	metG	Anticodon_1,tRNA-synt_1g,tRNA_bind
7.47962	-0.0287904	0.272979	-0.105467	0.916005	0.95702	780601	781749	1148	+	UDP-2-acetamido-2-deoxy-3-oxo-D-glucuronate aminotransferase	1235803.C825_02184	7.73e-278	759	COG0399@1|root,COG0399@2|Bacteria,4NEBI@976|Bacteroidetes,2FPAJ@200643|Bacteroidia,22WTH@171551|Porphyromonadaceae	976|Bacteroidetes	E	Belongs to the DegT DnrJ EryC1 family	degT	DegT_DnrJ_EryC1
7.33894	-0.806881	0.237664	-3.39506	0.000686147	0.00515332	781746	782765	1019	+	Inositol 2-dehydrogenase/D-chiro-inositol 3-dehydrogenase	1235803.C825_02185	8.34e-258	705	COG0673@1|root,COG0673@2|Bacteria,4NFY3@976|Bacteroidetes,2FR8Q@200643|Bacteroidia,22XGS@171551|Porphyromonadaceae	976|Bacteroidetes	S	Oxidoreductase, NAD-binding domain protein	NA	GFO_IDH_MocA,GFO_IDH_MocA_C
7.38137	-0.691994	0.252172	-2.74413	0.00606717	0.0291911	782962	783891	929	+	UDP-glucose 4-epimerase	1235803.C825_02186	1.29e-230	634	COG0451@1|root,COG0451@2|Bacteria,4NEZX@976|Bacteroidetes,2FM8V@200643|Bacteroidia,22W0M@171551|Porphyromonadaceae	976|Bacteroidetes	M	GDP-mannose 4,6 dehydratase	NA	GDP_Man_Dehyd
7.46272	-0.168642	0.214839	-0.784969	0.432472	0.635011	783914	785227	1313	+	UDP-glucose 6-dehydrogenase TuaD	1235803.C825_02187	9.51e-305	862	COG1004@1|root,COG1004@2|Bacteria,4NE00@976|Bacteroidetes,2FMZ9@200643|Bacteroidia,22WMK@171551|Porphyromonadaceae	976|Bacteroidetes	M	Belongs to the UDP-glucose GDP-mannose dehydrogenase family	ugd	UDPG_MGDP_dh,UDPG_MGDP_dh_C,UDPG_MGDP_dh_N
8.23741	0.58829	0.264919	2.22064	0.0263752	0.0883356	785259	785801	542	+	hypothetical protein	1235803.C825_02188	2.29e-119	342	COG3646@1|root,COG3646@2|Bacteria,4PMZP@976|Bacteroidetes,2G0MX@200643|Bacteroidia	976|Bacteroidetes	S	ORF6N domain	NA	ORF6N
8.60366	1.03137	0.168521	6.12016	9.34826e-10	4.27863e-08	786692	788128	1436	+	hypothetical protein	1235803.C825_02189	0	916	COG2244@1|root,COG2244@2|Bacteria,4NFKD@976|Bacteroidetes,2FNDA@200643|Bacteroidia,22WCM@171551|Porphyromonadaceae	976|Bacteroidetes	S	Polysaccharide biosynthesis protein	NA	Polysacc_synt_3,Polysacc_synt_C
6.95636	0.517716	0.318256	1.62673	0.103794	0.242822	788147	788974	827	+	hypothetical protein	1235803.C825_02190	1.25e-204	565	COG0500@1|root,COG2226@2|Bacteria,4P3EX@976|Bacteroidetes	976|Bacteroidetes	Q	Methyltransferase domain	NA	Methyltransf_23
6.98236	0.332154	0.307745	1.07932	0.280447	0.481962	788976	789821	845	+	hypothetical protein	1235803.C825_02191	3.35e-212	585	COG1216@1|root,COG1216@2|Bacteria,4NUHX@976|Bacteroidetes,2FP76@200643|Bacteroidia	976|Bacteroidetes	S	Glycosyltransferase	NA	Glycos_transf_2
7.19706	0.430676	0.259785	1.65782	0.0973546	0.232013	789821	790906	1085	+	hypothetical protein	1235803.C825_02192	5.23e-288	783	COG0457@1|root,COG0457@2|Bacteria,4NEG9@976|Bacteroidetes,2FMRB@200643|Bacteroidia,22Z6X@171551|Porphyromonadaceae	976|Bacteroidetes	S	Glycosyltransferase WbsX	NA	Glyco_tran_WbsX
7.46704	1.73781	0.295174	5.88742	3.92272e-09	1.5333e-07	790912	791814	902	+	hypothetical protein	1235803.C825_02193	5.02e-228	626	COG1216@1|root,COG1216@2|Bacteria,4NK0K@976|Bacteroidetes,2FM55@200643|Bacteroidia	976|Bacteroidetes	S	Psort location Cytoplasmic, score	NA	NA
7.72309	0.716487	0.197	3.63699	0.000275841	0.00252694	791833	793266	1433	+	dTDP-4-dehydro-6-deoxy-alpha-D-glucopyranose 2,3-dehydratase	1235803.C825_02194	0	962	2CCXX@1|root,2Z8MY@2|Bacteria,4P19D@976|Bacteroidetes,2FPRN@200643|Bacteroidia	976|Bacteroidetes	S	NDP-hexose 2,3-dehydratase	NA	Hexose_dehydrat
7.3152	1.20861	0.226245	5.34204	9.19041e-08	2.67471e-06	793268	794236	968	+	dTDP-3,4-didehydro-2,6-dideoxy-alpha-D-glucose 3-reductase	1235803.C825_02195	3.03e-231	636	COG0673@1|root,COG0673@2|Bacteria,4NFY3@976|Bacteroidetes,2FNBZ@200643|Bacteroidia,22VYM@171551|Porphyromonadaceae	976|Bacteroidetes	S	Oxidoreductase family, NAD-binding Rossmann fold	NA	GFO_IDH_MocA,GFO_IDH_MocA_C
7.14575	0.807805	0.323756	2.49511	0.012592	0.0509675	794246	795130	884	+	GDP-L-fucose synthase	1235803.C825_02196	1.73e-216	597	COG0451@1|root,COG0451@2|Bacteria	2|Bacteria	GM	ADP-glyceromanno-heptose 6-epimerase activity	NA	Epimerase
7.78071	1.09609	0.205486	5.33413	9.60018e-08	2.76392e-06	795148	796413	1265	+	D-inositol-3-phosphate glycosyltransferase	1235803.C825_02197	7.09e-305	848	COG0297@1|root,COG0297@2|Bacteria,4P3U5@976|Bacteroidetes,2G3HB@200643|Bacteroidia,2322W@171551|Porphyromonadaceae	976|Bacteroidetes	G	Glycosyl transferases group 1	NA	Glyco_trans_1_4,Glyco_transf_4,Glycos_transf_1
7.96417	1.919	0.242806	7.90345	2.71291e-15	3.30173e-13	796417	797388	971	+	hypothetical protein	1235803.C825_02198	2.64e-246	674	2C7E6@1|root,32JF5@2|Bacteria,4NSF7@976|Bacteroidetes	976|Bacteroidetes	NA	NA	NA	NA
7.14279	0.982244	0.322738	3.04347	0.00233867	0.0137621	797470	798228	758	+	hypothetical protein	1235803.C825_02199	1.98e-185	514	COG0463@1|root,COG0463@2|Bacteria,4PKFU@976|Bacteroidetes,2G3FQ@200643|Bacteroidia,231N7@171551|Porphyromonadaceae	976|Bacteroidetes	M	Glycosyl transferase family 2	NA	Glycos_transf_2
7.87631	0.253227	0.215382	1.17571	0.23971	0.43235	798255	800771	2516	+	hypothetical protein	1235803.C825_02200	0	1651	COG4485@1|root,COG4485@2|Bacteria,4NEE5@976|Bacteroidetes,2FMKE@200643|Bacteroidia,22VZ1@171551|Porphyromonadaceae	976|Bacteroidetes	S	membrane	NA	YfhO
6.79306	0.360921	0.361121	0.999447	0.317578	0.522628	800768	801616	848	+	hypothetical protein	1235803.C825_02201	1.6e-215	593	COG2865@1|root,COG2865@2|Bacteria,4NJ6Y@976|Bacteroidetes,2FN3Q@200643|Bacteroidia	976|Bacteroidetes	K	Divergent AAA domain	NA	AlbA_2,FaeA,HATPase_c_4
7.21177	0.136762	0.255045	0.536227	0.591802	0.755857	801601	802029	428	+	hypothetical protein	1235803.C825_02202	5.87e-99	287	COG2865@1|root,COG2865@2|Bacteria,4NJ6Y@976|Bacteroidetes,2FN3Q@200643|Bacteroidia	976|Bacteroidetes	K	Divergent AAA domain	NA	AlbA_2,FaeA,HATPase_c_4
7.3815	-0.419645	0.242078	-1.73351	0.0830045	0.20732	802296	803297	1001	+	hypothetical protein	1235803.C825_02203	4.02e-237	652	COG1216@1|root,COG1216@2|Bacteria,4NFS6@976|Bacteroidetes,2FNNV@200643|Bacteroidia,22W6N@171551|Porphyromonadaceae	976|Bacteroidetes	M	glycosyl transferase family 2	NA	Glyco_trans_2_3,Glycos_transf_2
5.58584	-0.191856	0.680159	-0.282075	0.777886	0.880858	803279	803824	545	-	D-glycero-alpha-D-manno-heptose-1,7-bisphosphate 7-phosphatase	1235803.C825_02204	2.13e-129	367	COG0241@1|root,COG0241@2|Bacteria,4NR54@976|Bacteroidetes,2FTDK@200643|Bacteroidia,22YDV@171551|Porphyromonadaceae	976|Bacteroidetes	E	Polynucleotide kinase 3 phosphatase	NA	Hydrolase_like,PNK3P
6.09416	-1.23627	0.4912	-2.51684	0.0118413	0.0488023	803802	804506	704	-	D-glycero-alpha-D-manno-heptose 1-phosphate guanylyltransferase	1235803.C825_02205	8.38e-169	471	COG1208@1|root,COG1208@2|Bacteria,4NMJ5@976|Bacteroidetes,2FNEE@200643|Bacteroidia,22XKJ@171551|Porphyromonadaceae	976|Bacteroidetes	JM	COG1208 Nucleoside-diphosphate-sugar pyrophosphorylase involved in lipopolysaccharide biosynthesis translation initiation factor 2B, gamma epsilon subunits (eIF-2Bgamma eIF-2Bepsilon)	NA	NTP_transferase
5.90553	0.287007	0.529239	0.542301	0.587611	0.752249	804510	805097	587	-	Phosphoheptose isomerase	1235803.C825_02206	6e-136	385	COG0279@1|root,COG0279@2|Bacteria,4NJX7@976|Bacteroidetes,2FSAT@200643|Bacteroidia,22YKV@171551|Porphyromonadaceae	976|Bacteroidetes	G	SIS domain	gmhA	SIS_2
7.24702	0.201558	0.274423	0.734481	0.462656	0.660129	805079	806113	1034	-	D-glycero-alpha-D-manno-heptose 7-phosphate kinase	1235803.C825_02207	2.29e-253	694	COG2605@1|root,COG2605@2|Bacteria,4NHEN@976|Bacteroidetes,2G38R@200643|Bacteroidia,2301E@171551|Porphyromonadaceae	976|Bacteroidetes	S	GHMP kinases C terminal	NA	Fucokinase,GHMP_kinases_C,GHMP_kinases_N
7.88906	-0.63088	0.165771	-3.80573	0.000141388	0.00147016	806261	807679	1418	-	Adenosylhomocysteinase	1235803.C825_02208	0	950	COG0499@1|root,COG0499@2|Bacteria,4NEKE@976|Bacteroidetes,2FPWZ@200643|Bacteroidia,22W9Y@171551|Porphyromonadaceae	976|Bacteroidetes	H	May play a key role in the regulation of the intracellular concentration of adenosylhomocysteine	ahcY	AdoHcyase,AdoHcyase_NAD
7.74986	-0.536402	0.202667	-2.64671	0.00812782	0.036888	807998	809653	1655	-	3-[(3aS,4S,7aS)-7a-methyl-1,5-dioxo-octahydro-1H-inden-4-yl]propanoyl:CoA ligase	1235803.C825_02209	0	1137	COG0318@1|root,COG0318@2|Bacteria,4NFPF@976|Bacteroidetes,2FMTR@200643|Bacteroidia,22W6H@171551|Porphyromonadaceae	976|Bacteroidetes	IQ	AMP-binding enzyme C-terminal domain	NA	AMP-binding,AMP-binding_C
6.99116	-1.37695	0.389046	-3.5393	0.000401197	0.0033727	809669	810253	584	-	hypothetical protein	1235803.C825_02210	1.79e-132	376	COG1396@1|root,COG1917@1|root,COG1396@2|Bacteria,COG1917@2|Bacteria,4NN23@976|Bacteroidetes,2FN1Y@200643|Bacteroidia,22XT7@171551|Porphyromonadaceae	976|Bacteroidetes	K	Helix-turn-helix domain	NA	Cupin_2,HTH_19,HTH_3
7.13217	-0.812257	0.715073	-1.13591	0.255995	0.451682	810404	810673	269	-	30S ribosomal protein S15	1235803.C825_02211	1.96e-54	170	COG0184@1|root,COG0184@2|Bacteria,4NS7U@976|Bacteroidetes,2FTTZ@200643|Bacteroidia,22YD7@171551|Porphyromonadaceae	976|Bacteroidetes	J	Forms an intersubunit bridge (bridge B4) with the 23S rRNA of the 50S subunit in the ribosome	rpsO	Ribosomal_S15
7.8298	-0.0964168	0.158288	-0.609122	0.542444	0.722404	810845	812641	1796	+	GTP-binding protein TypA/BipA	1235803.C825_02212	0	1181	COG1217@1|root,COG1217@2|Bacteria,4NDVM@976|Bacteroidetes,2FMNU@200643|Bacteroidia,22WPR@171551|Porphyromonadaceae	976|Bacteroidetes	T	GTP-binding protein TypA	typA	EFG_C,GTP_EFTU,GTP_EFTU_D2
6.93922	0.514057	0.340574	1.50938	0.131201	0.284676	812696	813346	650	-	hypothetical protein	1235803.C825_02213	1.39e-149	421	2DP7Y@1|root,330X4@2|Bacteria,4NUP0@976|Bacteroidetes,2FSIZ@200643|Bacteroidia,231R4@171551|Porphyromonadaceae	976|Bacteroidetes	NA	NA	NA	NA
8.22262	-0.275051	0.142771	-1.92651	0.0540402	0.148861	813518	815209	1691	-	hypothetical protein	1235803.C825_02214	0	1017	COG3063@1|root,COG3063@2|Bacteria,4PKG6@976|Bacteroidetes,2G3G2@200643|Bacteroidia,2322F@171551|Porphyromonadaceae	976|Bacteroidetes	NU	Tetratricopeptide repeat protein	NA	TPR_16,TPR_2,TPR_8
8.16719	-0.213605	0.180612	-1.18267	0.236938	0.42836	815514	817754	2240	-	hypothetical protein	1235803.C825_02215	0	1509	COG5640@1|root,COG5640@2|Bacteria,4PKEW@976|Bacteroidetes,2FRKU@200643|Bacteroidia,231HM@171551|Porphyromonadaceae	976|Bacteroidetes	O	Trypsin-like peptidase domain	NA	Trypsin_2
8.38973	0.0329635	0.247674	0.133092	0.89412	0.944382	817911	819551	1640	+	Fumarate hydratase class I, aerobic	1235803.C825_02216	0	1119	COG1838@1|root,COG1951@1|root,COG1838@2|Bacteria,COG1951@2|Bacteria,4NE85@976|Bacteroidetes,2FNPE@200643|Bacteroidia,22WPF@171551|Porphyromonadaceae	976|Bacteroidetes	C	Catalyzes the reversible hydration of fumarate to (S)- malate	fumB	Fumerase,Fumerase_C
8.27032	-0.223892	0.200694	-1.11559	0.264599	0.462292	820557	823742	3185	+	TonB-dependent receptor P26	1235803.C825_02217	0	2160	COG1629@1|root,COG1629@2|Bacteria,4NDXS@976|Bacteroidetes,2FM2D@200643|Bacteroidia,22Z7A@171551|Porphyromonadaceae	976|Bacteroidetes	P	CarboxypepD_reg-like domain	NA	CarbopepD_reg_2,Plug,STN,TonB_dep_Rec
7.8017	0.414374	0.161381	2.56768	0.0102381	0.0440716	823766	825670	1904	+	hypothetical protein	1235803.C825_02218	0	1294	COG0614@1|root,COG0614@2|Bacteria,4PNCX@976|Bacteroidetes,2G14F@200643|Bacteroidia	976|Bacteroidetes	P	Pfam:SusD	NA	SusD-like_3,SusD_RagB
6.83041	-1.4539	0.543493	-2.67511	0.00747047	0.0346959	825691	826170	479	+	hypothetical protein	1235803.C825_02219	2.21e-109	315	2E0CT@1|root,32VZN@2|Bacteria,4NU7H@976|Bacteroidetes,2FUVW@200643|Bacteroidia	976|Bacteroidetes	NA	NA	NA	NA
7.86379	-0.615372	0.180713	-3.40525	0.000661034	0.00501394	826361	828583	2222	-	Polyribonucleotide nucleotidyltransferase	1235803.C825_02220	0	1390	COG1185@1|root,COG1185@2|Bacteria,4NE4Q@976|Bacteroidetes,2FN5H@200643|Bacteroidia,22W1K@171551|Porphyromonadaceae	976|Bacteroidetes	J	Involved in mRNA degradation. Catalyzes the phosphorolysis of single-stranded polyribonucleotides processively in the 3'- to 5'-direction	pnp	KH_1,PNPase,RNase_PH,RNase_PH_C,S1
7.7098	-0.203508	0.239725	-0.84892	0.395926	0.602625	828751	829944	1193	+	hypothetical protein	1235803.C825_02221	5.97e-285	778	COG0526@1|root,COG0526@2|Bacteria,4P37Z@976|Bacteroidetes,2G3DY@200643|Bacteroidia,22WDB@171551|Porphyromonadaceae	976|Bacteroidetes	CO	Domain of unknown function (DUF4369)	NA	AhpC-TSA,DUF4369,Thioredoxin_8
6.80825	-0.333607	0.492907	-0.676814	0.498524	0.684381	830139	830609	470	+	Transcription elongation factor GreA	1235803.C825_02222	1.01e-99	290	COG0782@1|root,COG0782@2|Bacteria,4NNH6@976|Bacteroidetes,2FPFU@200643|Bacteroidia,22XVA@171551|Porphyromonadaceae	976|Bacteroidetes	K	Necessary for efficient RNA polymerase transcription elongation past template-encoded arresting sites. The arresting sites in DNA have the property of trapping a certain fraction of elongating RNA polymerases that pass through, resulting in locked ternary complexes. Cleavage of the nascent transcript by cleavage factors such as GreA or GreB allows the resumption of elongation from the new 3'termi…	greA	GreA_GreB,GreA_GreB_N
6.86791	-0.0695013	1.40983	-0.0492977	0.960682	0.981181	830621	831016	395	+	putative HIT-like protein	1235803.C825_02223	8.61e-89	260	COG0537@1|root,COG0537@2|Bacteria,4NQ4X@976|Bacteroidetes,2FSRY@200643|Bacteroidia,22Y7E@171551|Porphyromonadaceae	976|Bacteroidetes	FG	HIT family hydrolase	hinT	HIT
7.68605	0.579748	0.186801	3.10357	0.00191204	0.0118781	831226	832323	1097	-	hypothetical protein	1235803.C825_02224	2.18e-248	683	COG1983@1|root,COG1983@2|Bacteria,4NG3T@976|Bacteroidetes,2FPZX@200643|Bacteroidia,22XZS@171551|Porphyromonadaceae	976|Bacteroidetes	KT	PspC domain	NA	DUF2807,PspC
6.79503	0.866747	0.408964	2.11937	0.0340593	0.108049	832336	832662	326	-	hypothetical protein	1235803.C825_02225	3.85e-72	216	COG1695@1|root,COG1695@2|Bacteria,4NSI4@976|Bacteroidetes,2FTF6@200643|Bacteroidia,22Y5S@171551|Porphyromonadaceae	976|Bacteroidetes	K	Transcriptional regulator	NA	PadR
8.13098	0.00503688	0.133238	0.0378037	0.969844	0.985521	832883	834691	1808	+	Long-chain-fatty-acid--CoA ligase FadD15	1235803.C825_02226	0	1205	COG1022@1|root,COG1022@2|Bacteria,4NEA4@976|Bacteroidetes,2FNK9@200643|Bacteroidia,22WFS@171551|Porphyromonadaceae	976|Bacteroidetes	I	Long-chain fatty acid--CoA ligase	fadD	AMP-binding
7.61946	-0.0281475	0.1867	-0.150764	0.880162	0.937591	834901	835869	968	+	Peptide chain release factor RF2	1235803.C825_02227	1.14e-226	625	COG1186@1|root,COG1186@2|Bacteria,4NEN1@976|Bacteroidetes,2FMZK@200643|Bacteroidia,22WHJ@171551|Porphyromonadaceae	976|Bacteroidetes	J	Peptide chain release factor 2 directs the termination of translation in response to the peptide chain termination codons UGA and UAA	prfB	PCRF,RF-1
7.71955	-0.252241	1.50034	-0.168122	0.866487	0.930153	835950	836024	74	+	tRNA-Met(cat)	NA	NA	NA	NA	NA	NA	NA	NA	NA
8.02023	-0.421391	0.225775	-1.86642	0.0619825	0.16555	836450	837664	1214	+	IS256 family transposase ISSde5	1235803.C825_02229	3.82e-296	807	COG3328@1|root,COG3328@2|Bacteria,4NFQS@976|Bacteroidetes,2FM5A@200643|Bacteroidia,22XSB@171551|Porphyromonadaceae	976|Bacteroidetes	L	Transposase, Mutator family	NA	Transposase_mut
7.76691	-0.367255	0.171295	-2.14398	0.0320342	0.102789	837776	839833	2057	-	hypothetical protein	1235803.C825_02230	0	1402	COG3525@1|root,COG3525@2|Bacteria,4PICY@976|Bacteroidetes,2FWQP@200643|Bacteroidia	976|Bacteroidetes	G	Glycosyl hydrolase family 20, catalytic domain	NA	Glyco_hydro_20
7.48304	0.281803	0.206244	1.36636	0.171827	0.345127	839835	841466	1631	-	SusD-like protein P25	1235803.C825_02231	0	1093	COG1435@1|root,COG1435@2|Bacteria,4NFWU@976|Bacteroidetes,2FNY3@200643|Bacteroidia,22XJ7@171551|Porphyromonadaceae	976|Bacteroidetes	F	SusD family	NA	SusD-like_3,SusD_RagB
8.15102	0.131328	0.186306	0.704901	0.480872	0.673498	841492	844839	3347	-	TonB-dependent receptor SusC	1235803.C825_02232	0	2188	COG1629@1|root,COG4771@2|Bacteria,4P1Z5@976|Bacteroidetes,2FW4E@200643|Bacteroidia	976|Bacteroidetes	P	TonB-linked outer membrane protein, SusC RagA family	NA	CarbopepD_reg_2,Plug,TonB_dep_Rec
7.82754	0.488748	0.194665	2.51071	0.0120489	0.0494798	845090	846079	989	-	hypothetical protein	1235803.C825_02233	3.29e-234	644	COG3712@1|root,COG3712@2|Bacteria,4NHHS@976|Bacteroidetes,2FPTU@200643|Bacteroidia,22XT0@171551|Porphyromonadaceae	976|Bacteroidetes	PT	Domain of unknown function (DUF4974)	NA	DUF4974,FecR
6.73067	0.355922	0.370495	0.960668	0.336719	0.543128	846151	846744	593	-	ECF RNA polymerase sigma-E factor	1235803.C825_02234	1.07e-130	372	COG1595@1|root,COG1595@2|Bacteria,4NQBD@976|Bacteroidetes,2FNST@200643|Bacteroidia,22YAU@171551|Porphyromonadaceae	976|Bacteroidetes	K	Sigma-70, region 4	NA	Sigma70_r2,Sigma70_r4_2
7.88831	-0.151444	0.184179	-0.822265	0.410926	0.616121	846784	847860	1076	-	DNA polymerase IV	1235803.C825_02235	8.69e-256	701	COG0389@1|root,COG0389@2|Bacteria,4NF1Y@976|Bacteroidetes,2FNAN@200643|Bacteroidia,22VUU@171551|Porphyromonadaceae	976|Bacteroidetes	L	Poorly processive, error-prone DNA polymerase involved in untargeted mutagenesis. Copies undamaged DNA at stalled replication forks, which arise in vivo from mismatched or misaligned primer ends. These misaligned primers can be extended by PolIV. Exhibits no 3'-5' exonuclease (proofreading) activity. May be involved in translesional synthesis, in conjunction with the beta clamp from PolIII	dinB	IMS,IMS_C,IMS_HHH
8.03794	0.196356	0.165336	1.18762	0.234984	0.426297	848421	849347	926	+	hypothetical protein	1235803.C825_02236	7.56e-156	444	COG5434@1|root,COG5434@2|Bacteria,4NGH3@976|Bacteroidetes,2FMQQ@200643|Bacteroidia	976|Bacteroidetes	M	Psort location Cytoplasmic, score 8.96	NA	DUF3737
8.02076	-0.101921	0.156911	-0.649545	0.515986	0.700407	849344	850522	1178	+	Cystathionine beta-lyase PatB	1235803.C825_02237	1.28e-297	810	COG1168@1|root,COG1168@2|Bacteria,4NETH@976|Bacteroidetes,2FMIZ@200643|Bacteroidia	976|Bacteroidetes	E	Bifunctional PLP-dependent enzyme with beta-cystathionase and maltose regulon repressor activities	patB	Aminotran_1_2
7.91328	-0.457324	0.169655	-2.69561	0.00702599	0.0330908	850879	851622	743	+	A-factor type gamma-butyrolactone 1'-reductase (1S-forming)	1235803.C825_02238	1.56e-175	489	COG1028@1|root,COG1028@2|Bacteria,4NGQY@976|Bacteroidetes,2FMZ0@200643|Bacteroidia,22YBH@171551|Porphyromonadaceae	976|Bacteroidetes	IQ	KR domain	NA	adh_short_C2
6.56385	0.15654	0.444822	0.351915	0.724902	0.844247	851676	852212	536	+	FMN-dependent NADH-azoreductase	1235803.C825_02239	1.63e-127	362	COG0655@1|root,COG0655@2|Bacteria,4NHHY@976|Bacteroidetes,2FQJ4@200643|Bacteroidia,22XTE@171551|Porphyromonadaceae	976|Bacteroidetes	S	NADPH-dependent FMN reductase	ywqN	FMN_red
7.38863	-0.136828	0.199843	-0.684675	0.493549	0.682296	852235	853722	1487	-	Altronate dehydratase	1235803.C825_02240	0	991	COG2721@1|root,COG2721@2|Bacteria,4NFVQ@976|Bacteroidetes,2FPGJ@200643|Bacteroidia	976|Bacteroidetes	G	SAF domain protein	uxaA	GD_AH_C,SAF
7.15075	-0.612995	0.289692	-2.11602	0.034343	0.108564	853722	855161	1439	-	Altronate oxidoreductase	1235803.C825_02241	0	968	COG0246@1|root,COG0246@2|Bacteria,4NEMT@976|Bacteroidetes,2FNTW@200643|Bacteroidia,22XJN@171551|Porphyromonadaceae	976|Bacteroidetes	G	Mannitol dehydrogenase Rossmann domain	uxaB	Mannitol_dh,Mannitol_dh_C
7.81652	-0.400027	0.180077	-2.22142	0.0263224	0.0883187	855169	857688	2519	-	hypothetical protein	1235803.C825_02242	0	1755	COG1073@1|root,COG2755@1|root,COG1073@2|Bacteria,COG2755@2|Bacteria,4NG53@976|Bacteroidetes,2FQY0@200643|Bacteroidia,22XF9@171551|Porphyromonadaceae	976|Bacteroidetes	E	GDSL-like Lipase/Acylhydrolase	NA	Lipase_GDSL_2,Peptidase_S9
7.24638	-0.13554	0.302633	-0.44787	0.654247	0.797154	857756	858772	1016	-	putative zinc-type alcohol dehydrogenase-like protein YjmD	1235803.C825_02243	6.27e-248	680	COG1063@1|root,COG1063@2|Bacteria,4NHCK@976|Bacteroidetes,2FM1Q@200643|Bacteroidia,22WJ6@171551|Porphyromonadaceae	976|Bacteroidetes	E	Glucose dehydrogenase C-terminus	yjmD_1	ADH_N,ADH_zinc_N
7.39362	-0.914251	0.272234	-3.35832	0.000784175	0.00578284	858794	860047	1253	-	L-fucose-proton symporter	1235803.C825_02244	1.15e-299	817	COG0738@1|root,COG0738@2|Bacteria,4NEYR@976|Bacteroidetes,2FP5F@200643|Bacteroidia,22WIU@171551|Porphyromonadaceae	976|Bacteroidetes	G	Major Facilitator Superfamily	fucP	MFS_1
7.15196	-0.294234	0.256413	-1.1475	0.251174	0.446411	860070	860993	923	-	hypothetical protein	1235803.C825_02245	6.11e-228	627	COG3618@1|root,COG3618@2|Bacteria,4NHCW@976|Bacteroidetes,2FNCB@200643|Bacteroidia,22X7S@171551|Porphyromonadaceae	976|Bacteroidetes	S	Amidohydrolase	NA	Amidohydro_2
7.45172	-0.513991	0.311994	-1.64744	0.099468	0.235499	861027	861929	902	-	D-threo-aldose 1-dehydrogenase	1235803.C825_02246	8.96e-222	610	COG0667@1|root,COG0667@2|Bacteria,4NGIT@976|Bacteroidetes,2FMT5@200643|Bacteroidia,22WZK@171551|Porphyromonadaceae	976|Bacteroidetes	C	Aldo/keto reductase family	NA	Aldo_ket_red
7.35447	-0.752816	0.215496	-3.49341	0.000476894	0.00384603	862175	863215	1040	+	HTH-type transcriptional repressor CytR	1235803.C825_02247	4.77e-247	678	COG1609@1|root,COG1609@2|Bacteria,4NDW6@976|Bacteroidetes,2FM9W@200643|Bacteroidia,22W8E@171551|Porphyromonadaceae	976|Bacteroidetes	K	PFAM periplasmic binding protein LacI transcriptional regulator	NA	LacI,Peripla_BP_1,Peripla_BP_3
8.00216	-0.60905	0.16269	-3.74361	0.000181392	0.00181902	863181	867323	4142	-	Sensor histidine kinase RcsC	1235803.C825_02248	0	2629	COG0642@1|root,COG0745@1|root,COG3292@1|root,COG0745@2|Bacteria,COG2205@2|Bacteria,COG3292@2|Bacteria,4NDXU@976|Bacteroidetes,2FM2N@200643|Bacteroidia,22X4F@171551|Porphyromonadaceae	976|Bacteroidetes	T	Y_Y_Y domain	NA	HATPase_c,HTH_18,HisKA,Reg_prop,Response_reg,Y_Y_Y
7.62077	0.0478909	0.180433	0.265421	0.790685	0.886355	867390	868829	1439	+	Hexuronate transporter	1235803.C825_02249	0	956	COG2223@1|root,COG2223@2|Bacteria,4PKTA@976|Bacteroidetes,2G3HQ@200643|Bacteroidia,23232@171551|Porphyromonadaceae	976|Bacteroidetes	P	Major Facilitator Superfamily	NA	MFS_1
7.54256	0.0621408	0.282377	0.220063	0.825822	0.905421	868839	869984	1145	-	hypothetical protein	1235803.C825_02250	5.47e-282	769	28M4A@1|root,2ZAI8@2|Bacteria,4NIAH@976|Bacteroidetes,2FQR3@200643|Bacteroidia,22WAE@171551|Porphyromonadaceae	976|Bacteroidetes	NA	NA	NA	NA
7.79732	0.893535	0.217849	4.10162	4.10269e-05	0.000531959	870165	871007	842	+	hypothetical protein	1235803.C825_02251	2.71e-197	547	COG3279@1|root,COG3279@2|Bacteria,4NKFH@976|Bacteroidetes,2FPQP@200643|Bacteroidia,22W1A@171551|Porphyromonadaceae	976|Bacteroidetes	KT	LytTr DNA-binding domain	NA	LytTR
8.17083	0.0453567	0.162593	0.278958	0.780277	0.882176	871185	873542	2357	+	hypothetical protein	1235803.C825_02252	0	1516	COG0577@1|root,COG0577@2|Bacteria,4P04X@976|Bacteroidetes,2FM7X@200643|Bacteroidia,22ZDY@171551|Porphyromonadaceae	976|Bacteroidetes	V	MacB-like periplasmic core domain	NA	FtsX,MacB_PCD
8.26553	0.13903	0.193822	0.71731	0.473183	0.667893	873683	877735	4052	+	Sensor histidine kinase RcsC	1235803.C825_02253	0	2644	COG0745@1|root,COG3292@1|root,COG5002@1|root,COG0745@2|Bacteria,COG3292@2|Bacteria,COG5002@2|Bacteria,4P0IA@976|Bacteroidetes,2FWSR@200643|Bacteroidia	976|Bacteroidetes	T	ATPase histidine kinase DNA gyrase B HSP90 domain protein	NA	HATPase_c,HTH_18,HTH_AraC,HisKA,Reg_prop,Response_reg,Y_Y_Y
8.16274	0.121835	0.171084	0.712135	0.476381	0.670482	877887	881030	3143	+	TonB-dependent receptor P26	1235803.C825_02254	0	2102	COG1629@1|root,COG1629@2|Bacteria,4NDXS@976|Bacteroidetes,2FM2D@200643|Bacteroidia,23234@171551|Porphyromonadaceae	976|Bacteroidetes	P	TonB dependent receptor	NA	CarbopepD_reg_2,Plug,TonB_dep_Rec
7.73357	-0.0265844	0.210531	-0.126273	0.899516	0.947837	881043	882776	1733	+	hypothetical protein	1235803.C825_02255	0	1179	COG1435@1|root,COG1435@2|Bacteria,4NKPJ@976|Bacteroidetes,2FQ2P@200643|Bacteroidia,2323U@171551|Porphyromonadaceae	976|Bacteroidetes	F	Pfam:SusD	NA	SusD-like_3,SusD_RagB
7.75709	0.237668	0.166778	1.42505	0.154142	0.319068	882799	884631	1832	+	hypothetical protein	1235803.C825_02256	0	1213	COG4225@1|root,COG4225@2|Bacteria,4NHN6@976|Bacteroidetes,2G2QI@200643|Bacteroidia	976|Bacteroidetes	S	Heparinase II/III-like protein	NA	Hepar_II_III
7.93498	0.357895	0.156131	2.29228	0.0218897	0.076966	884664	885875	1211	+	Unsaturated glucuronyl hydrolase	1235803.C825_02257	1.11e-305	839	COG1331@1|root,COG1331@2|Bacteria,4PKHP@976|Bacteroidetes,2G06V@200643|Bacteroidia,22X55@171551|Porphyromonadaceae	976|Bacteroidetes	O	Glycosyl Hydrolase Family 88	NA	Glyco_hydro_88
7.55315	0.172874	0.223807	0.772424	0.439863	0.641491	886196	886696	500	-	hypothetical protein	1235803.C825_02258	1.42e-122	348	2E4GG@1|root,32ZBN@2|Bacteria,4NW9P@976|Bacteroidetes,2FSEX@200643|Bacteroidia	976|Bacteroidetes	S	Lipid-binding putative hydrolase	NA	Lipid_bd
6.7132	0.11282	0.347467	0.324694	0.745413	0.858889	886710	887414	704	-	hypothetical protein	1235803.C825_02259	1.45e-169	473	2CTRP@1|root,32SU0@2|Bacteria,4NSRN@976|Bacteroidetes,2FT85@200643|Bacteroidia,230D8@171551|Porphyromonadaceae	976|Bacteroidetes	S	Domain of unknown function (DUF5011)	NA	DUF5011,DUF5012
7.4678	-0.575162	0.253032	-2.27308	0.0230212	0.0799471	887436	888947	1511	-	hypothetical protein	1235803.C825_02260	0	1008	COG4198@1|root,COG4198@2|Bacteria,4PKK3@976|Bacteroidetes,2G0JV@200643|Bacteroidia	976|Bacteroidetes	S	Susd and RagB outer membrane lipoprotein	NA	SusD-like,SusD-like_2
8.19109	-0.191425	0.176777	-1.08286	0.278869	0.480174	888967	892179	3212	-	TonB-dependent receptor SusC	1235803.C825_02261	0	2140	COG4206@1|root,COG4206@2|Bacteria,4NZWU@976|Bacteroidetes,2G065@200643|Bacteroidia	976|Bacteroidetes	P	TonB-linked outer membrane protein, SusC RagA family	NA	CarbopepD_reg_2,Plug,TonB_dep_Rec
8.31735	-0.475309	0.17479	-2.71931	0.00654179	0.0310837	892943	894997	2054	-	hypothetical protein	1235803.C825_02262	0	1429	COG3669@1|root,COG3669@2|Bacteria,4NEDX@976|Bacteroidetes,2FNFV@200643|Bacteroidia,22WIN@171551|Porphyromonadaceae	976|Bacteroidetes	G	F5 8 type C domain protein	NA	Alpha_L_fucos,CHB_HEX_C_1,F5_F8_type_C,Fn3_assoc
7.0744	-0.590681	0.279758	-2.1114	0.0347379	0.109296	895216	896052	836	+	Inositol 2-dehydrogenase/D-chiro-inositol 3-dehydrogenase	1235803.C825_02263	5.64e-176	501	COG0673@1|root,COG0673@2|Bacteria,4NF9M@976|Bacteroidetes,2FP2F@200643|Bacteroidia,22ZHX@171551|Porphyromonadaceae	976|Bacteroidetes	S	Oxidoreductase family, NAD-binding Rossmann fold	NA	GFO_IDH_MocA,TAT_signal
7.8942	-0.0298486	0.219666	-0.135882	0.891915	0.94261	896010	896651	641	+	hypothetical protein	1235803.C825_02263	1.31e-156	449	COG0673@1|root,COG0673@2|Bacteria,4NF9M@976|Bacteroidetes,2FP2F@200643|Bacteroidia,22ZHX@171551|Porphyromonadaceae	976|Bacteroidetes	S	Oxidoreductase family, NAD-binding Rossmann fold	NA	GFO_IDH_MocA,TAT_signal
5.94615	-0.358692	0.631318	-0.568164	0.569924	0.739864	897347	898869	1522	+	16S ribosomal RNA	NA	NA	NA	NA	NA	NA	NA	NA	NA
4.07862	8.53958	3.23388	2.64066	0.00827453	0.0373846	902305	902407	102	+	5S ribosomal RNA	NA	NA	NA	NA	NA	NA	NA	NA	NA
7.29251	-0.660287	0.361338	-1.82734	0.0676488	0.176816	902515	903324	809	+	hypothetical protein	1235803.C825_02269	1.4e-198	549	COG0657@1|root,COG0657@2|Bacteria,4NHDX@976|Bacteroidetes,2FP2B@200643|Bacteroidia,22VVK@171551|Porphyromonadaceae	976|Bacteroidetes	I	Carboxylesterase family	NA	Abhydrolase_3,COesterase
4.40377	0.0183033	2.24095	0.00816764	0.993483	0.997872	903362	903682	320	-	hypothetical protein	1235803.C825_02270	4.21e-66	201	COG0393@1|root,COG0393@2|Bacteria,4NQGB@976|Bacteroidetes,2FT9V@200643|Bacteroidia,22YBW@171551|Porphyromonadaceae	976|Bacteroidetes	S	Belongs to the UPF0145 family	NA	YbjQ_1
7.37283	-0.232936	0.243419	-0.956937	0.338599	0.54515	903693	905252	1559	-	hypothetical protein	1235803.C825_02271	0	1078	COG3537@1|root,COG3537@2|Bacteria,4NDYB@976|Bacteroidetes,2FMQ9@200643|Bacteroidia,22XIK@171551|Porphyromonadaceae	976|Bacteroidetes	G	Glycosyl hydrolase family 92	NA	Glyco_hydro_92
6.70879	-0.724262	0.313491	-2.31031	0.020871	0.0742619	905219	905950	731	-	hypothetical protein	1235803.C825_02271	1.94e-164	479	COG3537@1|root,COG3537@2|Bacteria,4NDYB@976|Bacteroidetes,2FMQ9@200643|Bacteroidia,22XIK@171551|Porphyromonadaceae	976|Bacteroidetes	G	Glycosyl hydrolase family 92	NA	Glyco_hydro_92
4.26888	-0.135415	1.24271	-0.108968	0.913228	0.955517	906127	907245	1118	+	IS110 family transposase ISAzo28	1235803.C825_05534	5.16e-271	741	COG3547@1|root,COG3547@2|Bacteria,4NMIB@976|Bacteroidetes,2G37Z@200643|Bacteroidia,22Z06@171551|Porphyromonadaceae	976|Bacteroidetes	L	Transposase, IS116 IS110 IS902 family	NA	DEDD_Tnp_IS110,Transposase_20
8.04608	0.224088	0.212918	1.05246	0.292588	0.495741	907839	908093	254	+	hypothetical protein	1235803.C825_02273	1.95e-54	170	COG1595@1|root,COG1595@2|Bacteria	2|Bacteria	K	DNA-templated transcription, initiation	NA	Sigma70_r2,Sigma70_r4_2
5.10566	0.457032	1.63463	0.279594	0.779789	0.882022	908112	908432	320	+	hypothetical protein	1235803.C825_02274	2.96e-66	201	2DNJZ@1|root,32XW6@2|Bacteria,4PM01@976|Bacteroidetes,2G09M@200643|Bacteroidia,22YXZ@171551|Porphyromonadaceae	976|Bacteroidetes	NA	NA	NA	NA
3.9041	-6.76667	3.30072	-2.05006	0.040359	0.121281	908513	908791	278	+	hypothetical protein	1235803.C825_02275	7.27e-56	174	2EFF3@1|root,3397Y@2|Bacteria,4NVP1@976|Bacteroidetes,2FTU1@200643|Bacteroidia,22YUY@171551|Porphyromonadaceae	976|Bacteroidetes	S	Lysine exporter LysO	NA	Lys_export
6.33725	-0.723013	0.435633	-1.65969	0.0969777	0.231549	908788	909414	626	+	Lysine exporter LysO	1235803.C825_02276	7.16e-139	393	COG2431@1|root,COG2431@2|Bacteria,4NMM0@976|Bacteroidetes,2FNT2@200643|Bacteroidia,22XP9@171551|Porphyromonadaceae	976|Bacteroidetes	S	Lysine exporter LysO	NA	Lys_export
6.93709	-0.527375	0.4184	-1.26045	0.207505	0.392093	909440	910036	596	+	hypothetical protein	1235803.C825_02277	3.47e-141	398	2F3HX@1|root,33WBG@2|Bacteria,4P3QP@976|Bacteroidetes	976|Bacteroidetes	NA	NA	NA	NA
8.32801	-0.13384	0.171918	-0.778512	0.436267	0.639007	910153	913443	3290	-	Tol-Pal system protein TolB	1235803.C825_02278	0	2126	COG0793@1|root,COG4946@1|root,COG0793@2|Bacteria,COG4946@2|Bacteria,4NGU2@976|Bacteroidetes,2FPGA@200643|Bacteroidia,22W33@171551|Porphyromonadaceae	976|Bacteroidetes	M	Tricorn protease homolog	NA	PD40,Peptidase_S41,Tricorn_C1,Tricorn_PDZ
8.36164	-0.205092	0.179055	-1.14541	0.252038	0.447353	914845	918258	3413	+	hypothetical protein	1235803.C825_02279	0	2239	COG1629@1|root,COG4771@2|Bacteria,4P1Z5@976|Bacteroidetes,2FW4E@200643|Bacteroidia,22XIY@171551|Porphyromonadaceae	976|Bacteroidetes	P	TonB-linked outer membrane protein, SusC RagA family	NA	CarbopepD_reg_2,Plug,TonB_dep_Rec
8.01251	0.442336	0.170419	2.59558	0.00944318	0.0413139	918278	920215	1937	+	hypothetical protein	1235803.C825_02280	0	1356	COG0702@1|root,COG0702@2|Bacteria,4PP4A@976|Bacteroidetes,2G12M@200643|Bacteroidia	976|Bacteroidetes	GM	Pfam:SusD	NA	SusD-like_3,SusD_RagB
8.19435	-0.187973	0.203888	-0.921942	0.356559	0.564069	920462	923704	3242	+	Tricorn protease	1235803.C825_02281	0	2138	COG0793@1|root,COG4946@1|root,COG0793@2|Bacteria,COG4946@2|Bacteria,4NGU2@976|Bacteroidetes,2FPGA@200643|Bacteroidia,22XI5@171551|Porphyromonadaceae	976|Bacteroidetes	M	Tricorn protease homolog	NA	PD40,Peptidase_S41,Tricorn_C1,Tricorn_PDZ
7.31909	0.222544	0.246926	0.901257	0.367452	0.57468	923879	924451	572	+	RNA polymerase sigma factor SigY	1235803.C825_02282	2.01e-127	363	COG1595@1|root,COG1595@2|Bacteria,4NRYG@976|Bacteroidetes,2FSMX@200643|Bacteroidia,230UV@171551|Porphyromonadaceae	976|Bacteroidetes	K	Sigma-70, region 4	NA	Sigma70_r2,Sigma70_r4_2
7.81918	0.403123	0.297082	1.35694	0.174799	0.348492	924537	925544	1007	+	hypothetical protein	1235803.C825_02283	2.33e-237	653	COG3712@1|root,COG3712@2|Bacteria,4NKN5@976|Bacteroidetes,2FRTJ@200643|Bacteroidia	976|Bacteroidetes	PT	Sigma factor regulatory protein, FecR PupR family	NA	DUF4974,FecR
8.15003	0.246295	0.154886	1.59016	0.111798	0.25454	925706	929188	3482	+	TonB-dependent receptor P39	1235803.C825_02284	0	2322	COG1629@1|root,COG1629@2|Bacteria,4NDXS@976|Bacteroidetes,2FKYX@200643|Bacteroidia	976|Bacteroidetes	P	TonB-linked outer membrane protein, SusC RagA family	NA	CarbopepD_reg_2,Plug,TonB_dep_Rec
7.62735	-0.0884774	0.193234	-0.457877	0.647041	0.79302	929201	930703	1502	+	SusD-like protein P38	1235803.C825_02285	0	1021	COG1395@1|root,COG1395@2|Bacteria,4P0EC@976|Bacteroidetes,2G3FP@200643|Bacteroidia,22XZ7@171551|Porphyromonadaceae	976|Bacteroidetes	K	Pfam:SusD	NA	SusD-like_3,SusD_RagB
7.48502	0.106105	0.256036	0.414414	0.678571	0.813465	930787	931965	1178	+	hypothetical protein	1235803.C825_02286	2.05e-303	825	COG4409@1|root,COG4409@2|Bacteria,4P27R@976|Bacteroidetes,2G2FP@200643|Bacteroidia	976|Bacteroidetes	G	BNR repeat-like domain	NA	BNR_2
7.71736	-0.579667	0.172926	-3.35211	0.000801974	0.00588297	932056	934341	2285	+	hypothetical protein	1235803.C825_02287	0	1555	COG3525@1|root,COG3525@2|Bacteria,4NE08@976|Bacteroidetes,2FNAR@200643|Bacteroidia,22WBH@171551|Porphyromonadaceae	976|Bacteroidetes	G	Glycosyl hydrolase family 20, catalytic domain	NA	CHB_HEX_C_1,Fn3_assoc,Glyco_hydro_20,Glyco_hydro_20b,PA14
6.90691	-0.595759	0.296633	-2.00841	0.0446002	0.12952	934357	935379	1022	+	hypothetical protein	1235803.C825_02288	9.4e-260	710	COG1957@1|root,COG1957@2|Bacteria	2|Bacteria	F	ribosylpyrimidine nucleosidase activity	NA	IU_nuc_hydro
7.82366	-0.278706	0.163455	-1.70509	0.0881783	0.217101	935438	936643	1205	+	Inositol 2-dehydrogenase/D-chiro-inositol 3-dehydrogenase	1235803.C825_02289	1.35e-305	838	COG0673@1|root,COG3733@1|root,COG0673@2|Bacteria,COG3733@2|Bacteria,4NN43@976|Bacteroidetes	976|Bacteroidetes	Q	Oxidoreductase family, NAD-binding Rossmann fold	NA	GFO_IDH_MocA
7.50224	0.252042	0.296627	0.849695	0.395495	0.602353	936917	937483	566	+	RNA polymerase sigma factor YlaC	1235803.C825_02290	1.47e-119	343	COG1595@1|root,COG1595@2|Bacteria,4NUZT@976|Bacteroidetes,2FNBX@200643|Bacteroidia	976|Bacteroidetes	K	Sigma-70, region 4	NA	Sigma70_r2,Sigma70_r4_2
7.65863	0.338198	0.16633	2.0333	0.0420226	0.124258	937508	938761	1253	+	hypothetical protein	1235803.C825_02291	8.46e-302	823	COG3712@1|root,COG3712@2|Bacteria,4NJBJ@976|Bacteroidetes,2FQUN@200643|Bacteroidia,22YHT@171551|Porphyromonadaceae	976|Bacteroidetes	PT	Domain of unknown function (DUF4974)	NA	DUF4974,FecR
8.02782	0.074245	0.182863	0.406014	0.684732	0.817739	938856	942389	3533	+	TonB-dependent receptor P39	1235803.C825_02292	0	2392	COG1629@1|root,COG1629@2|Bacteria,4NDXS@976|Bacteroidetes,2FKYX@200643|Bacteroidia,22W07@171551|Porphyromonadaceae	976|Bacteroidetes	P	TonB-dependent receptor plug domain	NA	CarbopepD_reg_2,Plug,STN,TonB_dep_Rec
7.61583	-0.0114196	0.27869	-0.0409761	0.967315	0.984377	942416	943882	1466	+	SusD-like protein P38	1235803.C825_02293	0	988	COG0702@1|root,COG0702@2|Bacteria,4NEPE@976|Bacteroidetes,2FMBU@200643|Bacteroidia	976|Bacteroidetes	GM	SusD family	NA	SusD-like_3,SusD_RagB
7.79914	-0.104485	0.171146	-0.610504	0.541528	0.721543	943907	946021	2114	+	hypothetical protein	1235803.C825_02294	0	1472	COG1957@1|root,COG4409@1|root,COG1957@2|Bacteria,COG4409@2|Bacteria,4NKEW@976|Bacteroidetes,2FRFG@200643|Bacteroidia	976|Bacteroidetes	G	BNR repeat-like domain	NA	BNR_2
7.77324	0.200562	0.242249	0.827917	0.407718	0.61295	946191	947201	1010	+	hypothetical protein	1235803.C825_02295	3.51e-253	693	COG1957@1|root,COG1957@2|Bacteria	2|Bacteria	F	ribosylpyrimidine nucleosidase activity	NA	IU_nuc_hydro
7.18728	0.847591	0.273648	3.09738	0.0019524	0.0119899	947259	947933	674	+	hypothetical protein	1235803.C825_02296	4e-162	453	COG2755@1|root,COG2755@2|Bacteria,4NHBT@976|Bacteroidetes,2G2NP@200643|Bacteroidia,22XYM@171551|Porphyromonadaceae	976|Bacteroidetes	E	GDSL-like Lipase/Acylhydrolase	NA	Lipase_GDSL_2
6.58634	-0.281242	0.455441	-0.617516	0.536895	0.717762	948032	948403	371	-	hypothetical protein	391587.KAOT1_14557	9.57e-18	80.1	2ENN4@1|root,33G9F@2|Bacteria,4NZBT@976|Bacteroidetes,1I6CW@117743|Flavobacteriia	976|Bacteroidetes	NA	NA	NA	NA
7.18483	-0.14072	0.31211	-0.450868	0.652084	0.795787	948503	949030	527	+	DNA polymerase III PolC-type	1235803.C825_02298	6.67e-130	368	COG0847@1|root,COG0847@2|Bacteria,4NEQX@976|Bacteroidetes,2FQEU@200643|Bacteroidia,22Y8S@171551|Porphyromonadaceae	976|Bacteroidetes	L	DNA polymerase III	NA	DUF5051,RNase_T
7.4022	-0.431146	0.26803	-1.60857	0.10771	0.248293	949177	950367	1190	-	Serine/threonine transporter SstT	1235803.C825_02299	6.18e-250	690	COG1301@1|root,COG1301@2|Bacteria,4NE5X@976|Bacteroidetes,2FP3G@200643|Bacteroidia,22X00@171551|Porphyromonadaceae	976|Bacteroidetes	U	Belongs to the dicarboxylate amino acid cation symporter (DAACS) (TC 2.A.23) family	sstT	SDF
8.00982	0.283251	0.180787	1.56677	0.117169	0.263077	950336	951802	1466	-	Malate-2H(+)/Na(+)-lactate antiporter	1235803.C825_02300	0	921	COG1757@1|root,COG1757@2|Bacteria,4NFQT@976|Bacteroidetes,2FNIY@200643|Bacteroidia,22WAI@171551|Porphyromonadaceae	976|Bacteroidetes	C	Na+/H+ antiporter family	nhaC	Na_H_antiporter
8.36435	0.72865	0.185049	3.93761	8.2298e-05	0.000949797	952357	954330	1973	+	hypothetical protein	1235803.C825_02301	0	1345	COG1215@1|root,COG1215@2|Bacteria,4NQ1I@976|Bacteroidetes,2FTMT@200643|Bacteroidia,230HG@171551|Porphyromonadaceae	976|Bacteroidetes	M	N-terminal domain of galactosyltransferase	NA	Glyco_transf_7C
7.96705	0.821009	0.180557	4.54708	5.43952e-06	9.6134e-05	954342	955727	1385	+	hypothetical protein	1235803.C825_02302	0	922	COG1215@1|root,COG1215@2|Bacteria,4NQ1I@976|Bacteroidetes,2FTMT@200643|Bacteroidia,230HG@171551|Porphyromonadaceae	976|Bacteroidetes	M	N-terminal domain of galactosyltransferase	NA	Glyco_transf_7C
8.12535	0.30564	0.157202	1.94425	0.0518654	0.14458	955836	958535	2699	+	hypothetical protein	1235803.C825_02303	0	1800	COG1629@1|root,COG2373@1|root,COG1629@2|Bacteria,COG2373@2|Bacteria,4NG2S@976|Bacteroidetes,2FMEP@200643|Bacteroidia,22X8I@171551|Porphyromonadaceae	976|Bacteroidetes	P	TonB-dependent Receptor Plug Domain	NA	A2M_N,CarboxypepD_reg,Plug
6.44405	1.03809	0.549094	1.89054	0.0586851	0.158957	958582	958872	290	+	hypothetical protein	NA	NA	NA	NA	NA	NA	NA	NA	NA
7.38724	1.50894	0.198391	7.60588	2.8298e-14	2.80621e-12	958960	959649	689	+	hypothetical protein	1235803.C825_02305	1.51e-164	460	COG3279@1|root,COG3279@2|Bacteria,4NX4A@976|Bacteroidetes,2FUXC@200643|Bacteroidia,231RF@171551|Porphyromonadaceae	976|Bacteroidetes	KT	Lanthionine synthetase C-like protein	NA	LANC_like
7.66816	1.54965	0.198462	7.80825	5.79858e-15	6.46904e-13	959642	960871	1229	+	D-inositol-3-phosphate glycosyltransferase	1235803.C825_02306	1.89e-294	803	COG0438@1|root,COG0438@2|Bacteria,4NM1Q@976|Bacteroidetes,2G2SF@200643|Bacteroidia,22ZC8@171551|Porphyromonadaceae	976|Bacteroidetes	M	Glycosyl transferases group 1	NA	Glyco_trans_1_4,Glyco_transf_4,Glycos_transf_1
8.22133	1.18666	0.178906	6.63284	3.29289e-11	1.87589e-09	960861	962414	1553	+	hypothetical protein	1235803.C825_02307	0	991	COG1651@1|root,COG1651@2|Bacteria,4NH0U@976|Bacteroidetes,2FQGH@200643|Bacteroidia	976|Bacteroidetes	O	Thioredoxin	NA	Peptidase_C39,Thioredoxin_4,VKOR
7.92588	0.498161	0.194382	2.5628	0.0103833	0.0445534	962742	963740	998	+	hypothetical protein	1235803.C825_02308	2.51e-235	647	COG3712@1|root,COG3712@2|Bacteria,4NKN5@976|Bacteroidetes,2FQIS@200643|Bacteroidia	976|Bacteroidetes	PT	Sigma factor regulatory protein, FecR PupR family	NA	DUF4974,FecR
8.1305	0.223897	0.193334	1.15809	0.246829	0.441187	963862	967260	3398	+	TonB-dependent receptor P26	1235803.C825_02309	0	2273	COG1629@1|root,COG1629@2|Bacteria,4NDXS@976|Bacteroidetes,2FM2D@200643|Bacteroidia,2322T@171551|Porphyromonadaceae	976|Bacteroidetes	P	CarboxypepD_reg-like domain	NA	CarbopepD_reg_2,Plug,STN,TonB_dep_Rec
8.11387	0.161828	0.132978	1.21696	0.223619	0.411931	967273	968916	1643	+	hypothetical protein	1235803.C825_02310	0	1108	COG1435@1|root,COG1435@2|Bacteria,4NFWU@976|Bacteroidetes,2FQZH@200643|Bacteroidia	976|Bacteroidetes	F	SusD family	NA	SusD-like_3,SusD_RagB
8.16801	0.0620563	0.202694	0.306157	0.759485	0.867926	969285	969848	563	+	hypothetical protein	1235803.C825_02311	8.61e-132	374	COG1595@1|root,COG1595@2|Bacteria,4NNBY@976|Bacteroidetes,2FQ9M@200643|Bacteroidia,22YPF@171551|Porphyromonadaceae	976|Bacteroidetes	K	RNA polymerase sigma-70 factor, Bacteroides expansion family 1	NA	Sigma70_r2,Sigma70_r4_2
7.93342	-0.344461	0.1497	-2.30102	0.0213906	0.0758085	970027	972912	2885	+	hypothetical protein	1235803.C825_02312	0	1951	2CB8C@1|root,33T5I@2|Bacteria,4P0N1@976|Bacteroidetes,2FX4B@200643|Bacteroidia	976|Bacteroidetes	NA	NA	NA	NA
8.03394	-0.209143	0.168268	-1.24291	0.213901	0.399804	972919	976380	3461	+	Hercynine oxygenase	1235803.C825_02313	0	2365	COG1262@1|root,COG1262@2|Bacteria,4NKT6@976|Bacteroidetes,2FR3S@200643|Bacteroidia	976|Bacteroidetes	S	Sulfatase-modifying factor enzyme 1	NA	FGE-sulfatase
7.4364	-1.04805	0.241334	-4.34275	1.40708e-05	0.000220319	976527	977483	956	-	(R)-stereoselective amidase	1235803.C825_02314	2.34e-242	664	COG0388@1|root,COG0388@2|Bacteria,4NGWX@976|Bacteroidetes,2FWMC@200643|Bacteroidia	976|Bacteroidetes	S	Carbon-nitrogen hydrolase	NA	CN_hydrolase
7.99675	0.341473	0.16063	2.12583	0.0335173	0.106773	977523	978221	698	-	NAD-dependent protein deacylase	1235803.C825_02315	4.33e-170	474	COG0846@1|root,COG0846@2|Bacteria,4NE9Q@976|Bacteroidetes,2FNXN@200643|Bacteroidia,22VUN@171551|Porphyromonadaceae	976|Bacteroidetes	K	NAD-dependent lysine deacetylase and desuccinylase that specifically removes acetyl and succinyl groups on target proteins. Modulates the activities of several proteins which are inactive in their acylated form	cobB	SIR2
8.06111	-0.314621	0.176853	-1.779	0.0752397	0.191861	978705	981977	3272	+	TonB-dependent receptor P3	1235803.C825_02316	0	2230	COG1629@1|root,COG1629@2|Bacteria,4NDXS@976|Bacteroidetes,2FM2D@200643|Bacteroidia,22VWX@171551|Porphyromonadaceae	976|Bacteroidetes	P	TonB dependent receptor	NA	CarbopepD_reg_2,Plug,TonB_dep_Rec
7.8289	-0.547295	0.189175	-2.89306	0.0038151	0.0201715	981986	984043	2057	+	hypothetical protein	1235803.C825_02317	0	1398	COG0457@1|root,COG0457@2|Bacteria,4NG3F@976|Bacteroidetes,2FM0I@200643|Bacteroidia,22XFW@171551|Porphyromonadaceae	976|Bacteroidetes	S	SusD family	NA	SusD-like_3,SusD_RagB
11.0007	-1.10054	0.480081	-2.2924	0.0218825	0.076966	984424	984873	449	+	hypothetical protein	1235803.C825_02318	3.21e-104	301	2AD57@1|root,312TT@2|Bacteria,4PHS5@976|Bacteroidetes,2FT1J@200643|Bacteroidia	976|Bacteroidetes	NA	NA	NA	NA
8.16281	-0.620158	0.155298	-3.99334	6.51477e-05	0.00078929	985756	987225	1469	-	hypothetical protein	1235803.C825_02319	0	1024	COG3538@1|root,COG3538@2|Bacteria,4NGY6@976|Bacteroidetes,2FM8H@200643|Bacteroidia,22VYN@171551|Porphyromonadaceae	976|Bacteroidetes	S	DUF1237	NA	Glyco_hydro_125
7.83884	0.420566	0.170958	2.46005	0.0138917	0.0551445	987243	988427	1184	-	hypothetical protein	1235803.C825_02320	1.35e-305	840	COG4833@1|root,COG4833@2|Bacteria,4NF5Z@976|Bacteroidetes,2FNXG@200643|Bacteroidia,22XJC@171551|Porphyromonadaceae	976|Bacteroidetes	G	Glycosyl hydrolase family 76	NA	Glyco_hydro_76
7.96129	-0.274939	0.164533	-1.67102	0.0947169	0.228041	988748	990346	1598	-	hypothetical protein	1235803.C825_02321	0	1122	2DBEW@1|root,2Z8UY@2|Bacteria,4NH98@976|Bacteroidetes,2FPNP@200643|Bacteroidia,22YKH@171551|Porphyromonadaceae	976|Bacteroidetes	S	Domain of unknown function (DUF4832)	NA	DUF4832,DUF4874
7.76915	0.0493205	0.184476	0.267355	0.789196	0.885606	990430	992349	1919	-	hypothetical protein	1235803.C825_02322	0	1318	COG0614@1|root,COG0614@2|Bacteria,4NIP6@976|Bacteroidetes,2G2NK@200643|Bacteroidia,22X84@171551|Porphyromonadaceae	976|Bacteroidetes	P	SusD family	NA	SusD-like_3,SusD_RagB
8.14832	-0.0622423	0.172075	-0.361717	0.717564	0.838985	992361	995834	3473	-	TonB-dependent receptor P26	1235803.C825_02323	0	1955	COG4206@1|root,COG4206@2|Bacteria,4P258@976|Bacteroidetes,2FWW6@200643|Bacteroidia,23270@171551|Porphyromonadaceae	976|Bacteroidetes	H	TonB-dependent Receptor Plug Domain	NA	CarbopepD_reg_2,Plug,TonB_dep_Rec
7.85332	0.526308	0.181925	2.893	0.00381582	0.0201715	996018	997085	1067	-	hypothetical protein	1235803.C825_02325	3e-250	687	COG3712@1|root,COG3712@2|Bacteria,4NJBJ@976|Bacteroidetes,2FQUN@200643|Bacteroidia	976|Bacteroidetes	PT	Sigma factor regulatory protein, FecR PupR family	NA	DUF4974,FecR
7.51474	0.908562	0.253105	3.58967	0.000331098	0.0029066	997158	997703	545	-	hypothetical protein	1235803.C825_02326	9.36e-124	353	COG1595@1|root,COG1595@2|Bacteria,4NVCP@976|Bacteroidetes,2FRBB@200643|Bacteroidia	976|Bacteroidetes	K	RNA polymerase sigma-70 factor, ECF subfamily	NA	Sigma70_r2,Sigma70_r4_2
8.02071	0.269256	0.203454	1.32342	0.185695	0.363316	997902	999821	1919	-	hypothetical protein	1235803.C825_02327	0	1325	COG0614@1|root,COG0614@2|Bacteria,4NIP6@976|Bacteroidetes,2G2NK@200643|Bacteroidia,22X84@171551|Porphyromonadaceae	976|Bacteroidetes	P	SusD family	NA	SusD-like_3,SusD_RagB
8.07874	0.203927	0.154691	1.31829	0.187407	0.36573	999842	1003303	3461	-	TonB-dependent receptor P3	1235803.C825_02328	0	2297	COG4206@1|root,COG4206@2|Bacteria,4P258@976|Bacteroidetes,2FWW6@200643|Bacteroidia,23270@171551|Porphyromonadaceae	976|Bacteroidetes	H	TonB-dependent Receptor Plug Domain	NA	CarbopepD_reg_2,Plug,TonB_dep_Rec
8.09106	1.01523	0.146503	6.92971	4.21708e-12	2.97138e-10	1003420	1004523	1103	-	hypothetical protein	1235803.C825_02329	2.6e-257	706	COG3712@1|root,COG3712@2|Bacteria,4NE6N@976|Bacteroidetes,2FQ9J@200643|Bacteroidia,22Y6U@171551|Porphyromonadaceae	976|Bacteroidetes	PT	Domain of unknown function (DUF4974)	NA	DUF4974,FecR
7.97539	0.652523	0.189295	3.44712	0.000566606	0.00441014	1004696	1005022	326	-	hypothetical protein	999419.HMPREF1077_03599	2.75e-12	65.1	2A1BY@1|root,30PIV@2|Bacteria,4PHRF@976|Bacteroidetes,2FTNE@200643|Bacteroidia,231F5@171551|Porphyromonadaceae	976|Bacteroidetes	NA	NA	NA	NA
7.54878	-0.685228	0.210262	-3.25892	0.00111838	0.00763893	1005340	1006263	923	+	High-affinity zinc uptake system binding-protein ZnuA	1235803.C825_02331	1.03e-210	583	COG0803@1|root,COG0803@2|Bacteria,4NGMC@976|Bacteroidetes,2FMQR@200643|Bacteroidia,22XUG@171551|Porphyromonadaceae	976|Bacteroidetes	P	Zinc-uptake complex component A periplasmic	mntA	ZnuA
6.57536	0.207143	0.435669	0.475461	0.634459	0.785192	1006229	1007005	776	+	Zinc import ATP-binding protein ZnuC	1235803.C825_02332	1.34e-186	518	COG1121@1|root,COG1121@2|Bacteria,4NHZ9@976|Bacteroidetes,2FM2P@200643|Bacteroidia,22VV3@171551|Porphyromonadaceae	976|Bacteroidetes	P	ABC transporter, ATP-binding protein	znuC	ABC_tran
7.02632	-0.711005	0.259021	-2.74497	0.00605167	0.0291427	1007232	1008239	1007	+	N-acetyl-alpha-D-glucosaminyl-diphospho-ditrans,octacis-undecaprenol 4-epimerase	1235803.C825_02334	5.39e-252	690	COG0451@1|root,COG0451@2|Bacteria,4NEJJ@976|Bacteroidetes,2FNM5@200643|Bacteroidia,22W40@171551|Porphyromonadaceae	976|Bacteroidetes	GM	NAD dependent epimerase dehydratase family protein	NA	Epimerase
6.87985	-0.964658	0.32436	-2.97404	0.00293909	0.0164977	1008241	1009041	800	-	hypothetical protein	1235803.C825_02335	2.33e-136	392	COG3595@1|root,COG3595@2|Bacteria,4PK6K@976|Bacteroidetes,2G1GN@200643|Bacteroidia,22Z17@171551|Porphyromonadaceae	976|Bacteroidetes	S	Putative auto-transporter adhesin, head GIN domain	NA	DUF2807
7.47419	-0.0878564	0.23729	-0.370248	0.711197	0.833952	1009043	1009828	785	-	hypothetical protein	1235803.C825_02336	1.37e-176	493	COG3595@1|root,COG3595@2|Bacteria	2|Bacteria	NA	NA	NA	DUF2807,DUF4097
7.34431	-0.21545	0.214146	-1.00609	0.314372	0.520069	1010051	1010875	824	-	hypothetical protein	1235803.C825_02337	6.95e-142	406	COG3595@1|root,COG3595@2|Bacteria,4NIA2@976|Bacteroidetes,2FUKG@200643|Bacteroidia,22YUW@171551|Porphyromonadaceae	976|Bacteroidetes	S	Putative auto-transporter adhesin, head GIN domain	NA	DUF2807
7.7208	0.419105	0.240468	1.74287	0.0813564	0.204537	1010901	1011713	812	-	hypothetical protein	1235803.C825_02338	1.29e-109	324	COG3595@1|root,COG3595@2|Bacteria,4NSAQ@976|Bacteroidetes,2FPF9@200643|Bacteroidia,22YP6@171551|Porphyromonadaceae	976|Bacteroidetes	S	Putative auto-transporter adhesin, head GIN domain	NA	DUF2807
7.84417	0.191756	0.225121	0.851789	0.394331	0.601726	1012054	1013040	986	-	tRNA-dihydrouridine synthase B	1235803.C825_02339	4.71e-238	654	COG0042@1|root,COG0042@2|Bacteria,4NEN4@976|Bacteroidetes,2FM9Z@200643|Bacteroidia,22WST@171551|Porphyromonadaceae	976|Bacteroidetes	J	Catalyzes the synthesis of 5,6-dihydrouridine (D), a modified base found in the D-loop of most tRNAs, via the reduction of the C5-C6 double bond in target uridines	dus	Dus
6.37057	-1.52374	0.491943	-3.09738	0.00195239	0.0119899	1013137	1013538	401	-	hypothetical protein	457424.BFAG_04150	1.57e-09	62.4	COG3391@1|root,COG3391@2|Bacteria,4PJGU@976|Bacteroidetes,2FSQW@200643|Bacteroidia,4AR3B@815|Bacteroidaceae	976|Bacteroidetes	S	Domain of unknown function (DUF4934)	NA	DUF5128
7.4298	0.241477	0.255158	0.946382	0.343954	0.549434	1013584	1014351	767	-	hypothetical protein	1235803.C825_02341	8.04e-182	506	COG3391@1|root,COG3391@2|Bacteria,4P174@976|Bacteroidetes,2FRTQ@200643|Bacteroidia	976|Bacteroidetes	S	Domain of unknown function (DUF4934)	NA	DUF5128
7.90189	0.601209	0.191285	3.143	0.00167226	0.0106227	1014489	1015286	797	+	hypothetical protein	1235803.C825_02342	1.29e-192	534	COG2197@1|root,COG2197@2|Bacteria,4NGEU@976|Bacteroidetes,2FS2F@200643|Bacteroidia,230SI@171551|Porphyromonadaceae	976|Bacteroidetes	K	Transcriptional regulator	NA	GerE
5.99188	-0.183827	0.604599	-0.304048	0.761091	0.86901	1015456	1015812	356	+	Methicillin resistance regulatory protein MecI	1235803.C825_02343	1.33e-79	236	COG3682@1|root,COG3682@2|Bacteria,4NT4V@976|Bacteroidetes,2FSM6@200643|Bacteroidia,22YE4@171551|Porphyromonadaceae	976|Bacteroidetes	K	Penicillinase repressor	NA	Penicillinase_R
7.83334	0.36683	0.214566	1.70964	0.0873325	0.215713	1015825	1017711	1886	+	hypothetical protein	1235803.C825_02344	0	1209	COG4219@1|root,COG4219@2|Bacteria,4NDWS@976|Bacteroidetes,2FNCU@200643|Bacteroidia,22ZGK@171551|Porphyromonadaceae	976|Bacteroidetes	KT	BlaR1 peptidase M56	NA	CarbopepD_reg_2,Peptidase_M56,Plug,TonB_C
7.56442	-0.40867	0.184034	-2.22062	0.026377	0.0883356	1017881	1019116	1235	+	hypothetical protein	1235803.C825_02345	1.81e-293	801	COG0457@1|root,COG0457@2|Bacteria,4PI8M@976|Bacteroidetes,2G1ER@200643|Bacteroidia,231B4@171551|Porphyromonadaceae	976|Bacteroidetes	S	Tetratricopeptide repeat	NA	TPR_19
7.95726	0.0810043	0.158857	0.50992	0.610107	0.768524	1019183	1020379	1196	+	hypothetical protein	1235803.C825_02346	9.31e-294	801	COG3391@1|root,COG3391@2|Bacteria,4PJGU@976|Bacteroidetes,2FSQW@200643|Bacteroidia	976|Bacteroidetes	S	Domain of unknown function (DUF4934)	NA	DUF5128
7.92632	-0.295939	0.220418	-1.34263	0.179393	0.354618	1020689	1021921	1232	+	hypothetical protein	1235803.C825_02347	4.81e-293	800	COG0826@1|root,COG0826@2|Bacteria,4NERN@976|Bacteroidetes,2FN1E@200643|Bacteroidia,22VVZ@171551|Porphyromonadaceae	976|Bacteroidetes	O	collagenase	prtC	Peptidase_U32
5.46164	0.259757	1.19102	0.218096	0.827354	0.906215	1021921	1022331	410	+	hypothetical protein	1235803.C825_02348	1.2e-95	278	COG0824@1|root,COG0824@2|Bacteria,4NSJR@976|Bacteroidetes,2FS2E@200643|Bacteroidia,22Y6W@171551|Porphyromonadaceae	976|Bacteroidetes	S	acyl-CoA thioester hydrolase, YbgC YbaW family	NA	4HBT,4HBT_2
7.32049	-0.115492	0.215019	-0.537127	0.59118	0.755373	1022339	1023451	1112	+	hypothetical protein	1235803.C825_02349	4.06e-267	731	COG0758@1|root,COG0758@2|Bacteria,4NF7T@976|Bacteroidetes,2FKYE@200643|Bacteroidia,22WZ4@171551|Porphyromonadaceae	976|Bacteroidetes	LU	DNA protecting protein DprA	dprA	DNA_processg_A,HHH_5
6.90553	-0.402845	0.418012	-0.963717	0.335188	0.541838	1023565	1024347	782	+	hypothetical protein	1235803.C825_02350	2.82e-189	525	COG1718@1|root,COG1718@2|Bacteria,4NEF6@976|Bacteroidetes,2FQ2B@200643|Bacteroidia,22WD8@171551|Porphyromonadaceae	976|Bacteroidetes	DT	aminotransferase class I and II	NA	NA
6.48006	-0.419148	0.496653	-0.843944	0.398701	0.604469	1024325	1024708	383	+	hypothetical protein	1235803.C825_02351	2.14e-87	256	2CP0Z@1|root,32SI8@2|Bacteria,4NQDB@976|Bacteroidetes,2FSIV@200643|Bacteroidia,22Y7G@171551|Porphyromonadaceae	976|Bacteroidetes	S	Protein of unknown function (DUF3037)	NA	DUF3037
7.83021	-0.0974056	0.24098	-0.404207	0.686061	0.818378	1024983	1025804	821	-	Glyoxal reductase	1235803.C825_02352	9.5e-199	550	COG0656@1|root,COG0656@2|Bacteria,4NFTA@976|Bacteroidetes,2FMAF@200643|Bacteroidia,22VXT@171551|Porphyromonadaceae	976|Bacteroidetes	S	Aldo/keto reductase family	ytbE	Aldo_ket_red
6.71422	0.152859	0.417664	0.365985	0.714376	0.836171	1025970	1026482	512	+	hypothetical protein	1235803.C825_02353	2.43e-116	333	2C9ZH@1|root,32RQA@2|Bacteria,4NTU7@976|Bacteroidetes,2FU3Y@200643|Bacteroidia,22YRS@171551|Porphyromonadaceae	976|Bacteroidetes	S	Polyketide cyclase	NA	Polyketide_cyc2
7.3435	-0.913545	0.215596	-4.2373	2.26219e-05	0.000328154	1026495	1027544	1049	-	hypothetical protein	1235803.C825_02354	5.46e-259	709	COG3049@1|root,COG3049@2|Bacteria,4NGDB@976|Bacteroidetes,2FPJ2@200643|Bacteroidia,22WSC@171551|Porphyromonadaceae	976|Bacteroidetes	M	Linear amide C-N hydrolases, choloylglycine hydrolase family	cbh	CBAH
7.15735	1.09706	0.293465	3.73831	0.000185259	0.00184398	1027645	1028220	575	-	hypothetical protein	1235803.C825_02355	4.47e-106	308	COG1595@1|root,COG1595@2|Bacteria,4NR7M@976|Bacteroidetes	976|Bacteroidetes	K	RNA polymerase sigma-70 factor	NA	Sigma70_r2,Sigma70_r4_2
6.76671	-0.309944	0.389172	-0.796419	0.425789	0.62869	1028318	1028905	587	+	Outer membrane protein MIP	1235803.C825_02356	1.08e-138	392	COG0545@1|root,COG0545@2|Bacteria,4NDW4@976|Bacteroidetes,2FNCK@200643|Bacteroidia,22W5R@171551|Porphyromonadaceae	976|Bacteroidetes	O	Peptidyl-prolyl cis-trans isomerase	NA	FKBP_C,FKBP_N
7.26044	-0.542739	0.310818	-1.74616	0.0807825	0.203572	1028919	1029635	716	+	Outer membrane protein MIP	1235803.C825_02357	4.1e-162	454	COG0545@1|root,COG0545@2|Bacteria,4NP7W@976|Bacteroidetes,2FM5J@200643|Bacteroidia,231KN@171551|Porphyromonadaceae	976|Bacteroidetes	M	peptidyl-prolyl cis-trans isomerase	fkpB	FKBP_C,FKBP_N
7.26926	-0.00433906	0.378704	-0.0114577	0.990858	0.996441	1029804	1030271	467	+	Regulatory protein AsnC	1235803.C825_02358	1.63e-109	315	COG1522@1|root,COG1522@2|Bacteria,4NMEN@976|Bacteroidetes,2FMP2@200643|Bacteroidia,22XKX@171551|Porphyromonadaceae	976|Bacteroidetes	K	Transcriptional regulator	asnC	AsnC_trans_reg,HTH_24,HTH_AsnC-type
7.38662	-0.557125	0.274953	-2.02626	0.0427387	0.126027	1030371	1031747	1376	+	hypothetical protein	1235803.C825_02359	0	907	COG1404@1|root,COG1404@2|Bacteria,4NEIJ@976|Bacteroidetes,2FNT5@200643|Bacteroidia,22W7I@171551|Porphyromonadaceae	976|Bacteroidetes	O	Subtilase family	aprN	Peptidase_S8
7.31649	-0.49951	0.251024	-1.98989	0.0466034	0.133741	1031728	1033071	1343	+	Exodeoxyribonuclease 7 large subunit	1235803.C825_02360	1.7e-298	817	COG1570@1|root,COG1570@2|Bacteria,4NE64@976|Bacteroidetes,2FMMA@200643|Bacteroidia,22WD7@171551|Porphyromonadaceae	976|Bacteroidetes	L	Bidirectionally degrades single-stranded DNA into large acid-insoluble oligonucleotides, which are then degraded further into small acid-soluble oligonucleotides	xseA	Exonuc_VII_L,tRNA_anti_2
6.27298	-0.730007	0.490827	-1.4873	0.136936	0.2932	1033282	1034013	731	+	2-C-methyl-D-erythritol 4-phosphate cytidylyltransferase	1235803.C825_02362	2.06e-178	496	COG1211@1|root,COG1211@2|Bacteria,4NMB5@976|Bacteroidetes,2FM5H@200643|Bacteroidia,22XSS@171551|Porphyromonadaceae	976|Bacteroidetes	I	Catalyzes the formation of 4-diphosphocytidyl-2-C- methyl-D-erythritol from CTP and 2-C-methyl-D-erythritol 4- phosphate (MEP)	ispD	IspD
7.89701	-0.227838	0.168823	-1.34957	0.177155	0.351357	1033970	1036696	2726	-	Alpha-L-rhamnosidase	1235803.C825_02363	0	1891	COG3408@1|root,COG3408@2|Bacteria,4NESP@976|Bacteroidetes	976|Bacteroidetes	G	Alpha-L-rhamnosidase N-terminal domain	NA	Bac_rhamnosid,Bac_rhamnosid6H,Bac_rhamnosid_C,Bac_rhamnosid_N
8.49046	0.22265	0.187984	1.18441	0.236251	0.427695	1036922	1038061	1139	+	hypothetical protein	1235803.C825_02364	2.9e-276	755	COG1672@1|root,COG1672@2|Bacteria,4NGM3@976|Bacteroidetes,2FM92@200643|Bacteroidia,22WF5@171551|Porphyromonadaceae	976|Bacteroidetes	S	Pfam:Arch_ATPase	NA	ATPase_2
8.58311	1.19009	0.207702	5.72979	1.00553e-08	3.63824e-07	1038793	1040403	1610	+	hypothetical protein	1235803.C825_02365	0	1040	COG0457@1|root,COG0457@2|Bacteria,4P8Z4@976|Bacteroidetes,2FP7A@200643|Bacteroidia,231DK@171551|Porphyromonadaceae	976|Bacteroidetes	S	Tetratricopeptide repeat	NA	TPR_12,TPR_8
6.86968	0.530959	0.357485	1.48526	0.137475	0.293649	1040597	1040932	335	+	hypothetical protein	NA	NA	NA	NA	NA	NA	NA	NA	NA
8.37974	1.02066	0.190449	5.3592	8.35927e-08	2.45955e-06	1040977	1041957	980	+	hypothetical protein	1235803.C825_02367	3.17e-235	647	2ECVZ@1|root,336TA@2|Bacteria,4NX5G@976|Bacteroidetes,2FVDN@200643|Bacteroidia,23195@171551|Porphyromonadaceae	976|Bacteroidetes	NA	NA	NA	DUF4848
8.28842	0.425436	0.162759	2.6139	0.00895154	0.0396539	1042529	1042987	458	+	hypothetical protein	NA	NA	NA	NA	NA	NA	NA	NA	NA
6.41913	0.390844	0.487441	0.801829	0.422652	0.626086	1043078	1043539	461	+	hypothetical protein	NA	NA	NA	NA	NA	NA	NA	NA	NA
7.91609	-0.153405	0.204544	-0.749987	0.453262	0.652393	1043578	1045674	2096	+	ATP-dependent DNA helicase RecG	1235803.C825_02370	0	1369	COG1200@1|root,COG1200@2|Bacteria,4NDZV@976|Bacteroidetes,2FNKB@200643|Bacteroidia,22WQP@171551|Porphyromonadaceae	976|Bacteroidetes	L	Critical role in recombination and DNA repair. Helps process Holliday junction intermediates to mature products by catalyzing branch migration. Has a DNA unwinding activity characteristic of a DNA helicase with a 3'- to 5'- polarity. Unwinds branched duplex DNA (Y-DNA)	recG	DEAD,Helicase_C,RecG_wedge
7.5705	-0.398684	0.189896	-2.09949	0.0357738	0.111609	1045883	1047130	1247	+	hypothetical protein	1235803.C825_02371	1.34e-297	812	COG0739@1|root,COG1388@1|root,COG0739@2|Bacteria,COG1388@2|Bacteria,4NGHH@976|Bacteroidetes,2FMHT@200643|Bacteroidia,22XCK@171551|Porphyromonadaceae	976|Bacteroidetes	M	peptidase	mepM_1	LysM,Peptidase_M23
6.53745	0.24751	0.637345	0.388345	0.697761	0.825201	1047224	1047769	545	+	hypothetical protein	1235803.C825_02372	4.83e-126	358	28HFG@1|root,2Z7RJ@2|Bacteria,4NFNY@976|Bacteroidetes,2FKZK@200643|Bacteroidia,22X14@171551|Porphyromonadaceae	976|Bacteroidetes	S	Domain of Unknown Function (DUF1599)	NA	DUF1599
7.46076	-0.0349395	0.230078	-0.151859	0.879298	0.936856	1047773	1049050	1277	+	hypothetical protein	1235803.C825_02373	0	869	COG2259@1|root,COG2259@2|Bacteria,4NGNF@976|Bacteroidetes,2G2Z3@200643|Bacteroidia,22W11@171551|Porphyromonadaceae	976|Bacteroidetes	S	DoxX family	NA	DoxX
6.98751	0.385108	0.346747	1.11063	0.266727	0.465261	1049089	1049844	755	+	Triosephosphate isomerase	1235803.C825_02374	1.49e-175	489	COG0149@1|root,COG0149@2|Bacteria,4NE2F@976|Bacteroidetes,2FNEK@200643|Bacteroidia,22VV8@171551|Porphyromonadaceae	976|Bacteroidetes	G	Involved in the gluconeogenesis. Catalyzes stereospecifically the conversion of dihydroxyacetone phosphate (DHAP) to D-glyceraldehyde-3-phosphate (G3P)	tpiA	TIM
6.84923	-0.230083	0.414859	-0.554606	0.579165	0.746612	1049913	1050416	503	+	hypothetical protein	1235803.C825_02375	2.35e-117	335	2E2TU@1|root,32XVZ@2|Bacteria,4NVA0@976|Bacteroidetes,2FUX1@200643|Bacteroidia,22YNI@171551|Porphyromonadaceae	976|Bacteroidetes	S	Sporulation related domain	NA	SPOR
6.36839	-0.200405	0.473738	-0.423028	0.672275	0.810439	1050467	1051060	593	+	GTP cyclohydrolase 1	1235803.C825_02376	3.61e-138	390	COG0302@1|root,COG0302@2|Bacteria,4NFC2@976|Bacteroidetes,2FMYB@200643|Bacteroidia,22WSJ@171551|Porphyromonadaceae	976|Bacteroidetes	F	GTP cyclohydrolase 1	folE	GTP_cyclohydroI
6.63968	-1.10853	0.525515	-2.10941	0.0349089	0.109522	1051103	1051804	701	-	hypothetical protein	1235803.C825_02377	8.76e-175	486	COG3822@1|root,COG3822@2|Bacteria,4P1IF@976|Bacteroidetes,2FM0T@200643|Bacteroidia	976|Bacteroidetes	S	ABC-type sugar transport system, auxiliary component	NA	NA
7.27239	-0.855918	0.214261	-3.99475	6.47626e-05	0.00078929	1051816	1053342	1526	-	Xylulose kinase	1235803.C825_02378	0	1035	COG1070@1|root,COG1070@2|Bacteria,4NFBZ@976|Bacteroidetes,2FPIS@200643|Bacteroidia,22WNJ@171551|Porphyromonadaceae	2|Bacteria	G	FGGY family of carbohydrate kinases, N-terminal domain	NA	FGGY_C,FGGY_N
6.26527	-1.40644	0.427847	-3.28724	0.00101174	0.00703619	1053335	1054036	701	-	Deoxyribose-phosphate aldolase 2	1235803.C825_02379	5.64e-162	454	COG0274@1|root,COG0274@2|Bacteria,4NGE3@976|Bacteroidetes	976|Bacteroidetes	F	Catalyzes a reversible aldol reaction between acetaldehyde and D-glyceraldehyde 3-phosphate to generate 2-deoxy- D-ribose 5-phosphate	deoC	DeoC
6.63995	-1.25859	0.408933	-3.07773	0.00208586	0.0125644	1054039	1054809	770	-	NAD-dependent glycerol dehydrogenase	1235803.C825_02380	2.79e-178	497	COG1028@1|root,COG1028@2|Bacteria,4NFDX@976|Bacteroidetes,2FMSH@200643|Bacteroidia,22XE4@171551|Porphyromonadaceae	976|Bacteroidetes	IQ	KR domain	NA	adh_short_C2
7.86311	0.0284049	0.168899	0.168177	0.866444	0.930153	1054825	1057188	2363	-	Tol-Pal system protein TolB	1235803.C825_02381	0	1627	COG0823@1|root,COG0823@2|Bacteria,4NIGD@976|Bacteroidetes,2G2P7@200643|Bacteroidia	976|Bacteroidetes	U	Involved in the tonB-independent uptake of proteins	NA	NA
7.29394	-0.261633	0.213689	-1.22436	0.220815	0.408591	1057215	1058015	800	-	Transcriptional regulator KdgR	1235803.C825_02382	2.49e-186	518	COG1414@1|root,COG1414@2|Bacteria,4NHTZ@976|Bacteroidetes,2FR53@200643|Bacteroidia,230HR@171551|Porphyromonadaceae	976|Bacteroidetes	K	helix_turn_helix isocitrate lyase regulation	NA	HTH_IclR,IclR
6.971	0.496512	0.268379	1.85004	0.0643078	0.170648	1058199	1058687	488	+	hypothetical protein	1235803.C825_02383	8.27e-111	318	COG1595@1|root,COG1595@2|Bacteria,4NETF@976|Bacteroidetes,2FNPY@200643|Bacteroidia,22YBU@171551|Porphyromonadaceae	976|Bacteroidetes	K	Sigma-70, region 4	NA	Sigma70_r2,Sigma70_r4_2
7.94348	1.20849	0.222294	5.43642	5.43615e-08	1.66346e-06	1058700	1059281	581	+	hypothetical protein	1235803.C825_02384	2.35e-132	375	2AD5S@1|root,312UE@2|Bacteria,4PHST@976|Bacteroidetes,2FVZP@200643|Bacteroidia	976|Bacteroidetes	NA	NA	NA	NA
7.6364	0.225513	0.194069	1.16203	0.245224	0.439777	1059607	1060296	689	+	hypothetical protein	1235803.C825_02385	1.63e-168	470	29AXF@1|root,2ZXWK@2|Bacteria,4P8VZ@976|Bacteroidetes	976|Bacteroidetes	NA	NA	NA	OMP_b-brl_2
6.00104	-0.790565	0.615512	-1.2844	0.199001	0.380932	1060312	1060800	488	+	hypothetical protein	1235803.C825_02386	7.09e-121	344	COG3542@1|root,COG3542@2|Bacteria,4NPCH@976|Bacteroidetes,2FSDH@200643|Bacteroidia	976|Bacteroidetes	S	Cupin superfamily (DUF985)	NA	Cupin_5
7.26182	-0.747738	0.235203	-3.17912	0.00147725	0.00957709	1060811	1062019	1208	-	hypothetical protein	1235803.C825_02387	6.4e-303	824	28TKX@1|root,2ZFUJ@2|Bacteria,4NKCT@976|Bacteroidetes,2G3EV@200643|Bacteroidia,22XSQ@171551|Porphyromonadaceae	976|Bacteroidetes	S	Psort location Cytoplasmic, score 8.96	NA	NA
7.91653	-0.0756948	0.156485	-0.48372	0.628585	0.780629	1062081	1063931	1850	-	hypothetical protein	1235803.C825_02388	0	1158	COG5107@1|root,COG5107@2|Bacteria,4NEPG@976|Bacteroidetes,2FNHC@200643|Bacteroidia,22WFC@171551|Porphyromonadaceae	976|Bacteroidetes	A	Domain of Unknown Function (DUF349)	NA	DUF349
7.58749	-0.383293	0.235875	-1.62499	0.104165	0.243371	1064165	1065400	1235	-	Glutaconyl-CoA decarboxylase subunit beta	1235803.C825_02389	2.83e-281	770	COG1883@1|root,COG1883@2|Bacteria,4NGCN@976|Bacteroidetes,2FNXC@200643|Bacteroidia,22WH7@171551|Porphyromonadaceae	976|Bacteroidetes	C	Na+-transporting oxaloacetate decarboxylase beta subunit	NA	OAD_beta
7.94619	-0.689808	0.161476	-4.2719	1.93811e-05	0.000286701	1065400	1067253	1853	-	2-oxoglutarate carboxylase large subunit	1235803.C825_02390	0	1170	COG0511@1|root,COG5016@1|root,COG0511@2|Bacteria,COG5016@2|Bacteria,4NEQV@976|Bacteroidetes,2FMXG@200643|Bacteroidia,22WMD@171551|Porphyromonadaceae	976|Bacteroidetes	C	Oxaloacetate decarboxylase	NA	Biotin_lipoyl,Biotin_lipoyl_2,HMGL-like,PYC_OADA
3.343	0.155871	3.19237	0.0488262	0.961058	0.981213	1067580	1067888	308	-	hypothetical protein	1235803.C825_05070	4.29e-64	196	COG3547@1|root,COG3547@2|Bacteria,4PB8R@976|Bacteroidetes,2FYNJ@200643|Bacteroidia	976|Bacteroidetes	L	Transposase (IS116 IS110 IS902 family)	NA	NA
8.86047	0.875287	0.296395	2.95311	0.00314594	0.0174535	1068953	1069228	275	-	oxaloacetate decarboxylase gamma chain	1235803.C825_02393	5.16e-51	162	COG3630@1|root,COG3630@2|Bacteria,4NXVZ@976|Bacteroidetes,2FTVB@200643|Bacteroidia,22Z2E@171551|Porphyromonadaceae	976|Bacteroidetes	C	Oxaloacetate decarboxylase, gamma chain	NA	OAD_gamma
8.33944	0.0888832	0.218279	0.4072	0.683861	0.817255	1070165	1071127	962	+	Beta-barrel assembly-enhancing protease	1235803.C825_02394	1.08e-93	288	COG0457@1|root,COG0457@2|Bacteria,4NMG2@976|Bacteroidetes,2FP23@200643|Bacteroidia	976|Bacteroidetes	S	Tetratricopeptide repeat protein	NA	TPR_1,TPR_16,TPR_19,TPR_2,TPR_8
6.79068	-0.32294	0.310913	-1.03868	0.298952	0.502736	1071173	1071760	587	+	hypothetical protein	1235803.C825_02395	2.35e-133	378	COG1595@1|root,COG1595@2|Bacteria,4NNBY@976|Bacteroidetes,2FQ9M@200643|Bacteroidia	976|Bacteroidetes	K	RNA polymerase sigma-70 factor	NA	Sigma70_r2,Sigma70_r4_2
7.81473	-0.285972	0.193581	-1.47728	0.139601	0.2963	1071827	1072849	1022	+	hypothetical protein	1235803.C825_02396	7.03e-246	675	COG3712@1|root,COG3712@2|Bacteria,4NKN5@976|Bacteroidetes,2FQIS@200643|Bacteroidia	976|Bacteroidetes	PT	Sigma factor regulatory protein, FecR PupR family	NA	DUF4974,FecR
8.13155	-0.037522	0.170344	-0.220271	0.82566	0.905421	1073090	1076542	3452	+	TonB-dependent receptor P3	1235803.C825_02397	0	2306	COG1629@1|root,COG1629@2|Bacteria,4NDXS@976|Bacteroidetes,2FM2D@200643|Bacteroidia,22VWX@171551|Porphyromonadaceae	976|Bacteroidetes	P	TonB dependent receptor	NA	CarbopepD_reg_2,Plug,TonB_dep_Rec
7.79534	0.0005362	0.185889	0.00288453	0.997698	0.998256	1076555	1078444	1889	+	hypothetical protein	1235803.C825_02398	0	1288	COG0547@1|root,COG0547@2|Bacteria,4P227@976|Bacteroidetes,2G2P6@200643|Bacteroidia	976|Bacteroidetes	E	Pfam:SusD	NA	SusD-like_3,SusD_RagB
4.36887	0.120526	2.60053	0.0463466	0.963034	0.982108	1078542	1078694	152	+	50S ribosomal protein L34	1235803.C825_02399	1.85e-26	97.1	COG0230@1|root,COG0230@2|Bacteria,4NUTV@976|Bacteroidetes,2FUJ7@200643|Bacteroidia,23132@171551|Porphyromonadaceae	976|Bacteroidetes	J	Ribosomal protein L34	rpmH	Ribosomal_L34
6.71686	0.226695	0.308334	0.735223	0.462204	0.659675	1078812	1079447	635	+	hypothetical protein	1235803.C825_02400	2.51e-145	410	COG2815@1|root,COG2815@2|Bacteria,4NSUI@976|Bacteroidetes,2FPS4@200643|Bacteroidia,22YEV@171551|Porphyromonadaceae	976|Bacteroidetes	S	PASTA domain protein	pknB	PASTA
7.27994	-1.12751	0.286858	-3.93053	8.47583e-05	0.000969831	1079450	1080523	1073	+	Ribosomal large subunit pseudouridine synthase D	1235803.C825_02401	4.03e-265	725	COG0564@1|root,COG0564@2|Bacteria,4NEV3@976|Bacteroidetes,2FMD1@200643|Bacteroidia,22W4T@171551|Porphyromonadaceae	976|Bacteroidetes	J	Responsible for synthesis of pseudouridine from uracil	rluD	PseudoU_synth_2,S4
6.78358	-0.789034	0.29178	-2.70421	0.00684677	0.0323605	1080526	1081533	1007	+	D-alanine--D-alanine ligase A	1235803.C825_02402	5.33e-243	667	COG1181@1|root,COG1181@2|Bacteria,4NE9P@976|Bacteroidetes,2FNMC@200643|Bacteroidia,22WV1@171551|Porphyromonadaceae	976|Bacteroidetes	F	Belongs to the D-alanine--D-alanine ligase family	ddl	Dala_Dala_lig_C,Dala_Dala_lig_N
8.10158	-0.155147	0.215285	-0.720662	0.471117	0.666913	1081545	1082705	1160	+	hypothetical protein	1235803.C825_02403	2.71e-280	766	COG0204@1|root,COG0204@2|Bacteria,4NGR9@976|Bacteroidetes,2FM79@200643|Bacteroidia,22VV6@171551|Porphyromonadaceae	976|Bacteroidetes	I	Acyltransferase	NA	Acyltransferase
8.31572	-0.105461	0.163472	-0.645133	0.518841	0.702502	1083395	1087354	3959	-	Sensor histidine kinase RcsC	1235803.C825_02404	0	2480	COG0642@1|root,COG0745@1|root,COG3292@1|root,COG0745@2|Bacteria,COG2205@2|Bacteria,COG3292@2|Bacteria,4NDXU@976|Bacteroidetes,2FM2N@200643|Bacteroidia	976|Bacteroidetes	T	ATPase histidine kinase DNA gyrase B HSP90 domain protein	NA	HATPase_c,HTH_18,HisKA,Reg_prop,Response_reg,Y_Y_Y
7.90867	-0.000799938	0.164201	-0.00487171	0.996113	0.998256	1087580	1088815	1235	+	Putative nucleoside transporter YegT	1235803.C825_02405	2.58e-293	801	COG0477@1|root,COG2814@2|Bacteria,4PKJD@976|Bacteroidetes,2G0H0@200643|Bacteroidia,2323Y@171551|Porphyromonadaceae	976|Bacteroidetes	EGP	MFS_1 like family	NA	Nuc_H_symport
7.77275	-0.242276	0.185923	-1.3031	0.192541	0.372761	1089025	1090233	1208	+	Ornithine aminotransferase 2	1235803.C825_02406	8.72e-301	819	COG4992@1|root,COG4992@2|Bacteria,4NE93@976|Bacteroidetes,2FMPQ@200643|Bacteroidia,22WQY@171551|Porphyromonadaceae	976|Bacteroidetes	E	Belongs to the class-III pyridoxal-phosphate-dependent aminotransferase family	rocD	Aminotran_3
7.24522	-0.644966	0.244161	-2.64156	0.00825242	0.0373556	1090257	1091153	896	+	Arginase	1235803.C825_02407	1.6e-214	592	COG0010@1|root,COG0010@2|Bacteria,4NE26@976|Bacteroidetes,2FU2Y@200643|Bacteroidia,22YZP@171551|Porphyromonadaceae	976|Bacteroidetes	E	Belongs to the arginase family	rocF	Arginase
7.45922	-0.271004	0.245152	-1.10545	0.268963	0.467326	1091301	1092671	1370	-	Cation efflux system protein CusC	1235803.C825_02408	8.07e-305	854	COG1538@1|root,COG1538@2|Bacteria,4NDZK@976|Bacteroidetes,2FND5@200643|Bacteroidia,22W3J@171551|Porphyromonadaceae	976|Bacteroidetes	MU	Efflux transporter, outer membrane factor	NA	OEP
7.88247	-0.466442	0.197273	-2.36445	0.018057	0.0666335	1092676	1095888	3212	-	Efflux pump membrane transporter BepE	1235803.C825_02409	0	1998	COG0841@1|root,COG0841@2|Bacteria,4NDZG@976|Bacteroidetes,2FM3B@200643|Bacteroidia,22X30@171551|Porphyromonadaceae	976|Bacteroidetes	V	AcrB/AcrD/AcrF family	NA	ACR_tran
7.43291	0.214549	0.25425	0.84385	0.398753	0.604469	1095903	1097018	1115	-	Multidrug resistance protein MexA	1235803.C825_02410	6.13e-258	708	COG0845@1|root,COG0845@2|Bacteria,4NEXN@976|Bacteroidetes,2FN62@200643|Bacteroidia,22WVC@171551|Porphyromonadaceae	976|Bacteroidetes	M	Belongs to the membrane fusion protein (MFP) (TC 8.A.1) family	NA	Biotin_lipoyl_2,HlyD_D23
8.24585	0.236971	0.223537	1.0601	0.289099	0.491899	1097153	1098226	1073	+	hypothetical protein	1235803.C825_02411	3.56e-259	710	COG2207@1|root,COG2207@2|Bacteria,4NT24@976|Bacteroidetes,2G2TV@200643|Bacteroidia,231YI@171551|Porphyromonadaceae	976|Bacteroidetes	K	helix_turn_helix, arabinose operon control protein	NA	AraC_binding,HTH_18
7.7312	0.166206	0.229685	0.723624	0.469296	0.666423	1098830	1099330	500	-	Choline trimethylamine-lyase activating enzyme	1235803.C825_02412	4.07e-122	347	COG0602@1|root,COG0602@2|Bacteria,4NN9F@976|Bacteroidetes,2FPEE@200643|Bacteroidia,22Y2A@171551|Porphyromonadaceae	976|Bacteroidetes	C	Activation of anaerobic ribonucleoside-triphosphate reductase under anaerobic conditions by generation of an organic free radical, using S-adenosylmethionine and reduced flavodoxin as cosubstrates to produce 5'-deoxy-adenosine	nrdG	Fer4_12,Radical_SAM
7.99101	-0.279508	0.162304	-1.72212	0.0850479	0.211239	1099340	1101547	2207	-	Anaerobic ribonucleoside-triphosphate reductase	1235803.C825_02413	0	1489	COG1327@1|root,COG1328@1|root,COG1327@2|Bacteria,COG1328@2|Bacteria,4NGPS@976|Bacteroidetes,2FNK4@200643|Bacteroidia,22WTK@171551|Porphyromonadaceae	976|Bacteroidetes	FK	Ribonucleoside-triphosphate reductase	nrdD	ATP-cone,NRDD
7.72428	-0.228532	0.164582	-1.38856	0.164967	0.335002	1101865	1102593	728	-	hypothetical protein	1235803.C825_02414	1.45e-173	484	28MXZ@1|root,2ZB4X@2|Bacteria,4NJSR@976|Bacteroidetes,2FMTT@200643|Bacteroidia,22Z3V@171551|Porphyromonadaceae	976|Bacteroidetes	S	Psort location CytoplasmicMembrane, score 10.00	NA	NA
5.81692	0.00957857	1.1302	0.0084751	0.993238	0.997872	1102618	1103106	488	-	hypothetical protein	1235803.C825_02415	7.94e-109	313	COG3610@1|root,COG3610@2|Bacteria,4NN99@976|Bacteroidetes,2G2JD@200643|Bacteroidia,22XY2@171551|Porphyromonadaceae	976|Bacteroidetes	S	Threonine/Serine exporter, ThrE	NA	ThrE_2
7.52436	0.24778	0.311935	0.79433	0.427004	0.630092	1103103	1103870	767	-	Inner membrane protein YjjP	1235803.C825_02416	4.59e-172	481	COG2966@1|root,COG2966@2|Bacteria,4NIU3@976|Bacteroidetes,2G2IZ@200643|Bacteroidia,22XCT@171551|Porphyromonadaceae	976|Bacteroidetes	S	COGs COG2966 conserved	NA	ThrE
7.69867	-0.407376	0.235001	-1.73351	0.0830055	0.20732	1104187	1105044	857	-	ATP synthase gamma chain	1235803.C825_02417	6.34e-194	539	COG0224@1|root,COG0224@2|Bacteria,4NECM@976|Bacteroidetes,2FP5N@200643|Bacteroidia,22WNB@171551|Porphyromonadaceae	976|Bacteroidetes	C	Produces ATP from ADP in the presence of a proton gradient across the membrane. The gamma chain is believed to be important in regulating ATPase activity and the flow of protons through the CF(0) complex	atpG	ATP-synt
7.51412	-0.287161	0.23131	-1.24146	0.214436	0.400246	1105061	1106650	1589	-	ATP synthase subunit alpha	1235803.C825_02418	0	1023	COG0056@1|root,COG0056@2|Bacteria,4NFZW@976|Bacteroidetes,2FM4H@200643|Bacteroidia,22WEQ@171551|Porphyromonadaceae	976|Bacteroidetes	C	Produces ATP from ADP in the presence of a proton gradient across the membrane. The alpha chain is a regulatory subunit	atpA	ATP-synt_ab,ATP-synt_ab_C,ATP-synt_ab_N
6.00173	-0.243195	0.510108	-0.476753	0.633538	0.784612	1106664	1107206	542	-	ATP synthase subunit delta	1235803.C825_02419	5.86e-122	348	COG0712@1|root,COG0712@2|Bacteria,4NSNF@976|Bacteroidetes,2FQZ5@200643|Bacteroidia,22YFG@171551|Porphyromonadaceae	976|Bacteroidetes	C	F(1)F(0) ATP synthase produces ATP from ADP in the presence of a proton or sodium gradient. F-type ATPases consist of two structural domains, F(1) containing the extramembraneous catalytic core and F(0) containing the membrane proton channel, linked together by a central stalk and a peripheral stalk. During catalysis, ATP synthesis in the catalytic domain of F(1) is coupled via a rotary mechanism…	atpH	OSCP
5.649	-1.05001	1.04633	-1.00352	0.31561	0.521456	1107210	1107710	500	-	ATP synthase subunit b	1235803.C825_02420	2.75e-58	186	COG0711@1|root,COG0711@2|Bacteria,4NQKA@976|Bacteroidetes,2FQWH@200643|Bacteroidia,22Y51@171551|Porphyromonadaceae	976|Bacteroidetes	C	Component of the F(0) channel, it forms part of the peripheral stalk, linking F(1) to F(0)	atpF	ATP-synt_B
2.77252	7.23346	3.8219	1.89264	0.0584061	0.158522	1107724	1107978	254	-	ATP synthase subunit c	1235803.C825_02421	2.36e-28	104	COG0636@1|root,COG0636@2|Bacteria,4NURW@976|Bacteroidetes,2FTSZ@200643|Bacteroidia,22YE5@171551|Porphyromonadaceae	976|Bacteroidetes	C	F(1)F(0) ATP synthase produces ATP from ADP in the presence of a proton or sodium gradient. F-type ATPases consist of two structural domains, F(1) containing the extramembraneous catalytic core and F(0) containing the membrane proton channel, linked together by a central stalk and a peripheral stalk. During catalysis, ATP synthesis in the catalytic domain of F(1) is coupled via a rotary mechanism…	atpE	ATP-synt_C
7.20201	-0.710383	0.223589	-3.17718	0.00148715	0.00961801	1108029	1109087	1058	-	ATP synthase subunit a	1235803.C825_02422	2.89e-257	705	COG0356@1|root,COG0356@2|Bacteria,4NEPK@976|Bacteroidetes,2FNAB@200643|Bacteroidia,22VYZ@171551|Porphyromonadaceae	976|Bacteroidetes	C	it plays a direct role in the translocation of protons across the membrane	atpB	ATP-synt_A
4.91193	0.137216	1.73046	0.0792946	0.936798	0.966767	1109068	1109496	428	-	hypothetical protein	1235803.C825_02423	1.82e-93	273	2EK6R@1|root,33DX4@2|Bacteria,4NY14@976|Bacteroidetes,2FVRA@200643|Bacteroidia,22YXH@171551|Porphyromonadaceae	976|Bacteroidetes	S	Psort location CytoplasmicMembrane, score	NA	NA
7.39951	-0.232237	0.337634	-0.687836	0.491556	0.681056	1109752	1111269	1517	-	ATP synthase subunit beta, sodium ion specific	1235803.C825_02425	0	981	COG0055@1|root,COG0055@2|Bacteria,4NF1Q@976|Bacteroidetes,2FP0J@200643|Bacteroidia,22W4U@171551|Porphyromonadaceae	976|Bacteroidetes	C	Produces ATP from ADP in the presence of a proton gradient across the membrane. The catalytic sites are hosted primarily by the beta subunits	atpD	ATP-synt_ab,ATP-synt_ab_N
7.77138	-1.86121	1.46144	-1.27355	0.202824	0.386208	1111280	1111372	92	-	hypothetical protein	NA	NA	NA	NA	NA	NA	NA	NA	NA
8.17573	0.141149	0.164326	0.858959	0.390363	0.598948	1111829	1113829	2000	+	Vitamin B12 transporter BtuB	1235803.C825_02427	0	1338	COG4206@1|root,COG4206@2|Bacteria,4NED9@976|Bacteroidetes,2FNSZ@200643|Bacteroidia,22WUA@171551|Porphyromonadaceae	976|Bacteroidetes	H	TonB-dependent receptor	NA	Plug,TonB_dep_Rec
7.38447	0.491985	0.207377	2.37242	0.017672	0.0656266	1113862	1114965	1103	+	hypothetical protein	1235803.C825_02428	3.62e-248	683	COG3391@1|root,COG3391@2|Bacteria,4NESV@976|Bacteroidetes,2G2ND@200643|Bacteroidia,22YAZ@171551|Porphyromonadaceae	976|Bacteroidetes	S	amine dehydrogenase activity	NA	NA
7.60058	0.0706892	0.166654	0.424167	0.671444	0.809998	1114983	1116101	1118	+	hypothetical protein	1235803.C825_02429	3.53e-278	759	COG0614@1|root,COG0614@2|Bacteria,4NH9F@976|Bacteroidetes,2FMDS@200643|Bacteroidia,22X11@171551|Porphyromonadaceae	976|Bacteroidetes	P	COG0614 ABC-type Fe3 -hydroxamate transport system, periplasmic component	NA	Peripla_BP_2
8.19587	0.159975	0.169554	0.943504	0.345423	0.550846	1116429	1117805	1376	-	hypothetical protein	1235803.C825_02430	0	941	COG0446@1|root,COG0446@2|Bacteria,4NEK6@976|Bacteroidetes,2FT9Y@200643|Bacteroidia,22ZSH@171551|Porphyromonadaceae	976|Bacteroidetes	S	Pyridine nucleotide-disulphide oxidoreductase	NA	Pyr_redox_2
7.92988	0.0144127	0.158424	0.0909753	0.927512	0.962825	1118009	1120078	2069	-	hypothetical protein	1235803.C825_02431	0	1359	COG2825@1|root,COG2825@2|Bacteria,4PMUJ@976|Bacteroidetes,2G0GN@200643|Bacteroidia,22X9J@171551|Porphyromonadaceae	976|Bacteroidetes	M	helix_turn_helix, Lux Regulon	NA	Y_Y_Y
8.1585	-0.221559	0.143323	-1.54587	0.122136	0.270666	1120165	1123383	3218	-	Carbamoyl-phosphate synthase large chain	1235803.C825_02432	0	2108	COG0458@1|root,COG0458@2|Bacteria,4NEQ0@976|Bacteroidetes,2FMKD@200643|Bacteroidia,22X6E@171551|Porphyromonadaceae	976|Bacteroidetes	EF	Carbamoyl-phosphate synthetase large chain, oligomerisation domain	carB	CPSase_L_D2,CPSase_L_D3,MGS
8.09635	-0.118941	0.164709	-0.72213	0.470215	0.666544	1123672	1125501	1829	-	hypothetical protein	1235803.C825_02433	0	1212	COG0457@1|root,COG3307@1|root,COG0457@2|Bacteria,COG3307@2|Bacteria,4NJ9U@976|Bacteroidetes,2FMEI@200643|Bacteroidia,22XAU@171551|Porphyromonadaceae	976|Bacteroidetes	M	O-Antigen ligase	NA	TPR_8,Wzy_C
8.05814	-0.236201	0.159199	-1.48368	0.137894	0.293957	1125672	1128905	3233	-	Toluene efflux pump membrane transporter TtgH	1235803.C825_02434	0	2053	COG0841@1|root,COG0841@2|Bacteria,4NH0G@976|Bacteroidetes,2FM3G@200643|Bacteroidia,22X2G@171551|Porphyromonadaceae	976|Bacteroidetes	V	AcrB/AcrD/AcrF family	NA	ACR_tran
7.47132	-0.579472	0.241043	-2.40402	0.016216	0.0615427	1128918	1130396	1478	-	hypothetical protein	1235803.C825_02435	0	956	COG1538@1|root,COG1538@2|Bacteria,4NGXM@976|Bacteroidetes,2FMD9@200643|Bacteroidia,22XFV@171551|Porphyromonadaceae	976|Bacteroidetes	MU	Outer membrane efflux protein	NA	OEP
7.91294	-0.112334	0.15029	-0.747445	0.454795	0.653104	1130418	1133498	3080	-	Multidrug resistance protein MdtC	1235803.C825_02436	0	1879	COG0841@1|root,COG0841@2|Bacteria,4NE3H@976|Bacteroidetes,2FN4H@200643|Bacteroidia,22WXN@171551|Porphyromonadaceae	976|Bacteroidetes	V	Belongs to the resistance-nodulation-cell division (RND) (TC 2.A.6) family	NA	ACR_tran
7.39133	0.191852	0.311792	0.615322	0.538342	0.718908	1133508	1134599	1091	-	Multidrug resistance protein MdtA	1235803.C825_02437	1.23e-253	696	COG0845@1|root,COG0845@2|Bacteria,4NHJH@976|Bacteroidetes,2FP9C@200643|Bacteroidia,22VUH@171551|Porphyromonadaceae	976|Bacteroidetes	M	Belongs to the membrane fusion protein (MFP) (TC 8.A.1) family	NA	Biotin_lipoyl_2,HlyD_3,HlyD_D23
7.92734	0.41404	0.177264	2.33573	0.0195053	0.0707182	1134679	1136511	1832	-	hypothetical protein	1235803.C825_02438	0	1183	COG3307@1|root,COG3307@2|Bacteria,4NJ9U@976|Bacteroidetes,2FMEI@200643|Bacteroidia,22XAU@171551|Porphyromonadaceae	976|Bacteroidetes	M	O-Antigen ligase	NA	ANAPC3,TPR_8,Wzy_C
7.67332	0.39323	0.217377	1.80898	0.0704548	0.182175	1136514	1138025	1511	-	hypothetical protein	1235803.C825_02439	0	1035	COG1305@1|root,COG1305@2|Bacteria,4NGMN@976|Bacteroidetes,2FM89@200643|Bacteroidia,22W96@171551|Porphyromonadaceae	976|Bacteroidetes	E	non supervised orthologous group	NA	Transglut_core
7.74465	0.970384	0.229037	4.23679	2.26735e-05	0.000328154	1138037	1138912	875	-	Signal peptidase I	1235803.C825_02440	4.44e-222	610	COG0681@1|root,COG0681@2|Bacteria,4NJXI@976|Bacteroidetes,2FNKZ@200643|Bacteroidia,22XP5@171551|Porphyromonadaceae	976|Bacteroidetes	U	Belongs to the peptidase S26 family	NA	Peptidase_S24,Peptidase_S26
8.23443	1.81176	0.204873	8.84332	9.29191e-19	2.1634e-16	1139138	1139992	854	-	hypothetical protein	1235803.C825_02441	2.95e-203	562	2BZEB@1|root,2ZMZD@2|Bacteria,4NMWK@976|Bacteroidetes,2FQNP@200643|Bacteroidia,22XQ3@171551|Porphyromonadaceae	976|Bacteroidetes	S	Protein of unknown function (DUF1573)	NA	DUF1573
8.11099	1.63715	0.223439	7.32709	2.35207e-13	1.90838e-11	1139996	1141156	1160	-	hypothetical protein	1235803.C825_02442	1.63e-281	769	COG3391@1|root,COG3391@2|Bacteria,4NSU5@976|Bacteroidetes,2FS0J@200643|Bacteroidia	976|Bacteroidetes	S	Domain of unknown function (DUF4221)	NA	DUF4221
6.40192	1.05188	1.42977	0.735699	0.461914	0.659675	1141261	1141482	221	-	hypothetical protein	1235803.C825_02443	2.77e-49	156	296Z9@1|root,2ZU7U@2|Bacteria,4P8CM@976|Bacteroidetes	976|Bacteroidetes	S	NVEALA protein	NA	NVEALA
7.34846	0.499598	0.2296	2.17595	0.0295588	0.0965571	1141609	1142490	881	-	hypothetical protein	1235803.C825_02444	1.54e-214	592	2BZEB@1|root,2ZMZD@2|Bacteria,4NMWK@976|Bacteroidetes,2FQNP@200643|Bacteroidia,22XQ3@171551|Porphyromonadaceae	976|Bacteroidetes	S	Protein of unknown function (DUF1573)	NA	DUF1573
7.44114	0.199316	0.191421	1.04124	0.297762	0.501125	1142499	1143563	1064	-	hypothetical protein	1235803.C825_02445	1.52e-263	721	COG3391@1|root,COG3391@2|Bacteria,4NM81@976|Bacteroidetes,2FP02@200643|Bacteroidia,22YC4@171551|Porphyromonadaceae	976|Bacteroidetes	S	TolB-like 6-blade propeller-like	NA	TolB_like
5.50075	-0.513212	1.45994	-0.351528	0.725192	0.844376	1143569	1143769	200	-	hypothetical protein	763034.HMPREF9446_02030	4.64e-09	54.7	28UAQ@1|root,2ZGG6@2|Bacteria,4P8ZB@976|Bacteroidetes,2FVMF@200643|Bacteroidia,4ASME@815|Bacteroidaceae	976|Bacteroidetes	S	No significant database matches	NA	NVEALA
7.73977	0.653049	0.173021	3.77439	0.000160399	0.00163607	1143976	1144962	986	+	hypothetical protein	1235803.C825_02447	5.89e-232	639	COG3710@1|root,COG3710@2|Bacteria,4P6VC@976|Bacteroidetes	976|Bacteroidetes	K	Transcriptional regulator	NA	Trans_reg_C
8.29658	0.337988	0.160118	2.11087	0.0347839	0.109352	1144967	1146904	1937	-	hypothetical protein	1235803.C825_02448	0	1357	COG1305@1|root,COG1305@2|Bacteria,4NGMN@976|Bacteroidetes,2FM89@200643|Bacteroidia,22W96@171551|Porphyromonadaceae	976|Bacteroidetes	E	non supervised orthologous group	NA	NA
8.7627	0.88817	0.278046	3.19433	0.00140158	0.00922888	1147385	1147570	185	-	hypothetical protein	NA	NA	NA	NA	NA	NA	NA	NA	NA
8.11838	1.33489	0.174057	7.66927	1.72975e-14	1.81623e-12	1147741	1148889	1148	-	hypothetical protein	1235803.C825_02450	5.68e-280	764	2DPKY@1|root,332K2@2|Bacteria,4NVGX@976|Bacteroidetes,2FSTM@200643|Bacteroidia,230S1@171551|Porphyromonadaceae	976|Bacteroidetes	NA	NA	NA	DUF4221
8.30193	0.262102	0.20228	1.29574	0.195066	0.375593	1148993	1150114	1121	-	hypothetical protein	1235803.C825_02451	1.43e-273	748	COG3391@1|root,COG3391@2|Bacteria,4PAMU@976|Bacteroidetes,2FTWT@200643|Bacteroidia	976|Bacteroidetes	S	6-bladed beta-propeller	NA	DUF5128
8.28808	0.766744	0.193201	3.96863	7.22873e-05	0.000861265	1150647	1151876	1229	-	hypothetical protein	1235803.C825_02452	3.71e-301	820	COG1373@1|root,COG1373@2|Bacteria,4NED3@976|Bacteroidetes,2G31T@200643|Bacteroidia,230P5@171551|Porphyromonadaceae	976|Bacteroidetes	S	AAA domain	NA	AAA_14,DUF4143
7.80928	0.99867	0.189806	5.26153	1.42862e-07	3.88338e-06	1152002	1153030	1028	-	hypothetical protein	1235803.C825_02453	3.84e-260	711	28KNF@1|root,2ZA6N@2|Bacteria,4NGZC@976|Bacteroidetes,2FPMJ@200643|Bacteroidia,22W2H@171551|Porphyromonadaceae	976|Bacteroidetes	NA	NA	NA	DUF5128,TolB_like
8.17342	0.636394	0.148911	4.27365	1.923e-05	0.000285254	1153057	1154208	1151	-	hypothetical protein	1235803.C825_02454	2.95e-287	783	COG3391@1|root,COG3391@2|Bacteria,4NSU5@976|Bacteroidetes,2FS0J@200643|Bacteroidia,230NQ@171551|Porphyromonadaceae	976|Bacteroidetes	S	Domain of unknown function (DUF4221)	NA	DUF4221
7.8743	0.139764	0.235163	0.594328	0.552293	0.729018	1154462	1155301	839	+	hypothetical protein	1235803.C825_02455	6.69e-202	558	COG5464@1|root,COG5464@2|Bacteria,4P2RK@976|Bacteroidetes,2G319@200643|Bacteroidia,231ZG@171551|Porphyromonadaceae	976|Bacteroidetes	S	PD-(D/E)XK nuclease family transposase	NA	PDDEXK_2
7.74794	0.628961	0.183494	3.4277	0.000608727	0.00465012	1155430	1156572	1142	-	hypothetical protein	1235803.C825_02456	1.19e-280	766	COG3391@1|root,COG3391@2|Bacteria,4PPHH@976|Bacteroidetes	976|Bacteroidetes	S	Domain of unknown function (DUF4221)	NA	DUF4221
7.92454	0.117725	0.164391	0.716128	0.473912	0.668722	1156696	1158387	1691	-	Alpha-1,3-galactosidase A	1235803.C825_02457	0	1085	COG5434@1|root,COG5434@2|Bacteria,4NDWX@976|Bacteroidetes,2FMZA@200643|Bacteroidia,22X8E@171551|Porphyromonadaceae	976|Bacteroidetes	M	Parallel beta-helix repeats	NA	Beta_helix
7.849	0.97578	0.205608	4.74584	2.07645e-06	4.07303e-05	1158482	1159612	1130	-	hypothetical protein	1235803.C825_02458	2.32e-285	778	COG3391@1|root,COG3391@2|Bacteria,4P2J2@976|Bacteroidetes,2FP5A@200643|Bacteroidia	976|Bacteroidetes	S	6-bladed beta-propeller	NA	DUF5128
7.32167	0.503864	0.280861	1.79399	0.0728141	0.186832	1159687	1160565	878	+	hypothetical protein	1235803.C825_02459	1.61e-195	543	COG2126@1|root,COG2126@2|Bacteria,4NEX1@976|Bacteroidetes,2FMAY@200643|Bacteroidia,22YXP@171551|Porphyromonadaceae	976|Bacteroidetes	J	Ion transport protein	NA	Ion_trans
7.58681	1.16486	0.232777	5.00421	5.60905e-07	1.28912e-05	1161129	1161689	560	+	RNA polymerase sigma-H factor	1235803.C825_02462	3.36e-124	354	COG1595@1|root,COG1595@2|Bacteria,4NSAX@976|Bacteroidetes,2FU6X@200643|Bacteroidia,22YGA@171551|Porphyromonadaceae	976|Bacteroidetes	K	RNA polymerase sigma-70 factor	NA	Sigma70_r2,Sigma70_r4_2
7.59958	0.0145213	0.22598	0.0642592	0.948764	0.97386	1161756	1162748	992	+	hypothetical protein	1235803.C825_02463	3.87e-238	654	COG3712@1|root,COG3712@2|Bacteria,4NPUZ@976|Bacteroidetes,2FQ9G@200643|Bacteroidia,22Y2J@171551|Porphyromonadaceae	976|Bacteroidetes	PT	Domain of unknown function (DUF4974)	NA	DUF4974,FecR
8.21343	0.469091	0.165981	2.82617	0.0047108	0.023554	1162905	1166249	3344	+	TonB-dependent receptor P26	1235803.C825_02464	0	2251	COG1629@1|root,COG1629@2|Bacteria,4NDXS@976|Bacteroidetes,2FM2D@200643|Bacteroidia,2322T@171551|Porphyromonadaceae	976|Bacteroidetes	P	CarboxypepD_reg-like domain	NA	CarbopepD_reg_2,Plug,STN,TonB_dep_Rec
7.4583	0.41802	0.227212	1.83978	0.0658001	0.173576	1166262	1167803	1541	+	SusD-like protein P38	1235803.C825_02465	0	1060	COG1435@1|root,COG1435@2|Bacteria,4NFWU@976|Bacteroidetes,2FQZH@200643|Bacteroidia	976|Bacteroidetes	F	SusD family	NA	SusD-like_3,SusD_RagB
7.84054	0.209388	0.176315	1.18758	0.235001	0.426297	1167813	1169354	1541	+	N-acetylgalactosamine-6-O-sulfatase	1235803.C825_02466	0	1059	COG3119@1|root,COG3119@2|Bacteria,4NEFN@976|Bacteroidetes,2FQ6F@200643|Bacteroidia,231S2@171551|Porphyromonadaceae	976|Bacteroidetes	P	Sulfatase	NA	DUF4994,Sulfatase
8.01093	-0.100474	0.152829	-0.657425	0.510907	0.695276	1169572	1171719	2147	+	hypothetical protein	1235803.C825_02467	0	1472	COG3669@1|root,COG3669@2|Bacteria,4NEDX@976|Bacteroidetes,2FPVR@200643|Bacteroidia,22ZGP@171551|Porphyromonadaceae	976|Bacteroidetes	G	Alpha-L-fucosidase	NA	Alpha_L_fucos,CHB_HEX_C_1,F5_F8_type_C,Fn3_assoc
7.81513	-0.12656	0.159523	-0.793366	0.427565	0.630399	1171809	1173803	1994	+	hypothetical protein	1235803.C825_02468	0	1277	COG1554@1|root,COG1554@2|Bacteria,4NEWW@976|Bacteroidetes,2FMF9@200643|Bacteroidia,22W4V@171551|Porphyromonadaceae	976|Bacteroidetes	G	Glycosyl hydrolase family 65, N-terminal domain	NA	Glyco_hyd_65N_2
6.93861	-0.196189	0.271417	-0.72283	0.469784	0.666423	1173800	1174354	554	+	hypothetical protein	1235803.C825_02468	3.5e-125	379	COG1554@1|root,COG1554@2|Bacteria,4NEWW@976|Bacteroidetes,2FMF9@200643|Bacteroidia,22W4V@171551|Porphyromonadaceae	976|Bacteroidetes	G	Glycosyl hydrolase family 65, N-terminal domain	NA	Glyco_hyd_65N_2
7.9956	0.170917	0.176118	0.970464	0.331815	0.538731	1174565	1176010	1445	+	Ulvan-active sulfatase	1235803.C825_02469	0	957	COG3119@1|root,COG3119@2|Bacteria,4NE7S@976|Bacteroidetes,2FMTS@200643|Bacteroidia	976|Bacteroidetes	P	COG COG3119 Arylsulfatase A and related enzymes	NA	DUF4976,Sulfatase
7.47864	0.100162	0.291754	0.343311	0.731365	0.849005	1176056	1177111	1055	+	Tryptophan--tRNA ligase	1235803.C825_02470	2.91e-255	699	COG0180@1|root,COG0180@2|Bacteria,4NETX@976|Bacteroidetes,2FMAT@200643|Bacteroidia,22VZJ@171551|Porphyromonadaceae	976|Bacteroidetes	J	Tryptophanyl-tRNA synthetase	trpS	tRNA-synt_1b
4.9434	1.00081	1.65827	0.603526	0.546159	0.725028	1177169	1177516	347	-	hypothetical protein	1235803.C825_02471	6.96e-76	226	COG2361@1|root,COG2361@2|Bacteria,4NSC7@976|Bacteroidetes,2G2D1@200643|Bacteroidia,231W3@171551|Porphyromonadaceae	976|Bacteroidetes	S	Protein of unknown function DUF86	NA	DUF86
5.78239	1.33182	1.13355	1.17492	0.240029	0.432633	1177506	1177814	308	-	hypothetical protein	1235803.C825_02472	7.99e-69	207	COG1669@1|root,COG1669@2|Bacteria,4NV8X@976|Bacteroidetes	976|Bacteroidetes	S	PFAM Nucleotidyltransferase domain	NA	NTP_transf_2
7.43584	0.15281	0.320887	0.476212	0.633923	0.784714	1177973	1178521	548	+	hypothetical protein	1235803.C825_02473	1.05e-125	358	COG1595@1|root,COG1595@2|Bacteria,4NP39@976|Bacteroidetes,2FP42@200643|Bacteroidia,22Y53@171551|Porphyromonadaceae	976|Bacteroidetes	K	RNA polymerase sigma-70 factor	NA	Sigma70_r2,Sigma70_r4_2
7.28869	0.303729	0.251407	1.20812	0.227003	0.416729	1178622	1179410	788	+	hypothetical protein	1235803.C825_02474	1.46e-192	533	COG3637@1|root,COG3637@2|Bacteria,4NRZA@976|Bacteroidetes,2FUJ1@200643|Bacteroidia,22YT8@171551|Porphyromonadaceae	976|Bacteroidetes	M	Outer membrane protein beta-barrel domain	NA	OMP_b-brl_2
6.77732	-0.563347	0.29383	-1.91725	0.0552057	0.151448	1179423	1180268	845	+	hypothetical protein	1235803.C825_02475	4.34e-199	551	COG3712@1|root,COG3712@2|Bacteria,4NSK2@976|Bacteroidetes,2FSKZ@200643|Bacteroidia,22YVG@171551|Porphyromonadaceae	976|Bacteroidetes	PT	FecR protein	NA	DUF4974,FecR
7.86837	0.0574177	0.152884	0.375564	0.707241	0.831811	1180276	1182975	2699	+	hypothetical protein	1235803.C825_02476	0	1812	COG1629@1|root,COG4771@2|Bacteria,4NF4B@976|Bacteroidetes,2FM7I@200643|Bacteroidia,22XCB@171551|Porphyromonadaceae	976|Bacteroidetes	P	TonB-dependent receptor plug domain	NA	CarbopepD_reg_2,Plug,TonB_dep_Rec
7.24643	-0.220551	0.281252	-0.784175	0.432937	0.635346	1182981	1184039	1058	+	hypothetical protein	1235803.C825_02477	2.81e-258	707	2DQ4J@1|root,334Q5@2|Bacteria,4NVYX@976|Bacteroidetes,2FVYP@200643|Bacteroidia,22YZ9@171551|Porphyromonadaceae	976|Bacteroidetes	S	Domain of unknown function (DUF4249)	NA	DUF4249
7.36534	1.3771	0.396432	3.47372	0.000513291	0.00409638	1184292	1184774	482	-	hypothetical protein	1235803.C825_02479	1.79e-95	280	COG1278@1|root,COG1278@2|Bacteria,4NNNH@976|Bacteroidetes,2FSAQ@200643|Bacteroidia,22YBN@171551|Porphyromonadaceae	976|Bacteroidetes	K	'Cold-shock' DNA-binding domain	cspG	CSD
8.0463	0.376719	0.139771	2.69525	0.00703355	0.0330972	1185001	1187736	2735	+	hypothetical protein	1235803.C825_02480	0	1824	COG1629@1|root,COG4771@2|Bacteria,4NF4B@976|Bacteroidetes,2FM7I@200643|Bacteroidia,22XCB@171551|Porphyromonadaceae	976|Bacteroidetes	P	TonB-dependent receptor plug domain	NA	CarbopepD_reg_2,Plug,STN,TonB_dep_Rec
7.25738	0.662696	0.300471	2.20553	0.0274172	0.0912486	1187742	1188773	1031	+	hypothetical protein	1235803.C825_02481	9e-255	697	2EG5K@1|root,339XG@2|Bacteria,4NVFE@976|Bacteroidetes,2FPJS@200643|Bacteroidia,230QC@171551|Porphyromonadaceae	976|Bacteroidetes	S	Domain of unknown function (DUF4249)	NA	DUF4249
7.31406	-0.261723	0.2182	-1.19946	0.230349	0.421427	1188770	1189981	1211	-	4-O-beta-D-mannosyl-D-glucose phosphorylase	1235803.C825_02482	3.06e-305	833	COG2152@1|root,COG2152@2|Bacteria,4NGA2@976|Bacteroidetes,2FMJR@200643|Bacteroidia,22WMJ@171551|Porphyromonadaceae	976|Bacteroidetes	G	Converts 4-O-beta-D-mannopyranosyl-D-glucopyranose (Man- Glc) to mannose 1-phosphate (Man1P) and glucose	NA	Glyco_hydro_130
7.08433	1.02008	0.391834	2.60334	0.00923215	0.0405563	1190041	1190496	455	-	hypothetical protein	1235803.C825_02483	7.53e-104	300	COG0776@1|root,COG0776@2|Bacteria,4PJKQ@976|Bacteroidetes,2FSBD@200643|Bacteroidia	976|Bacteroidetes	L	DNA-binding protein	NA	NA
8.1557	0.643445	0.15031	4.28079	1.86227e-05	0.000277785	1190618	1192417	1799	-	Arylsulfate sulfotransferase AssT	1235803.C825_02484	0	1241	28MBK@1|root,2ZAQ1@2|Bacteria,4NGRY@976|Bacteroidetes,2FQBK@200643|Bacteroidia,22Z4B@171551|Porphyromonadaceae	976|Bacteroidetes	M	Arylsulfotransferase (ASST)	NA	Arylsulfotran_N,Arylsulfotrans
7.7061	-0.0889667	0.182886	-0.486459	0.626642	0.779278	1192516	1194144	1628	-	hypothetical protein	1235803.C825_02485	0	1120	COG0446@1|root,COG0446@2|Bacteria,4NJ05@976|Bacteroidetes,2G17C@200643|Bacteroidia	976|Bacteroidetes	S	Pfam:SusD	NA	SusD-like_3,SusD_RagB
8.21726	0.281748	0.131385	2.14445	0.0319969	0.102786	1194165	1197188	3023	-	TonB-dependent receptor P3	1235803.C825_02486	0	1958	COG1629@1|root,COG1629@2|Bacteria,4NDXS@976|Bacteroidetes,2FKYX@200643|Bacteroidia	976|Bacteroidetes	P	TonB-linked outer membrane protein, SusC RagA family	NA	CarbopepD_reg_2,Plug,TonB_dep_Rec
6.55544	0.991041	0.559762	1.77047	0.0766492	0.194529	1197235	1197645	410	-	hypothetical protein	NA	NA	NA	NA	NA	NA	NA	NA	NA
8.03728	0.570064	0.158313	3.60087	0.000317158	0.00282444	1197734	1198762	1028	-	hypothetical protein	NA	NA	NA	NA	NA	NA	NA	NA	NA
8.22261	0.746757	0.163729	4.56092	5.09291e-06	9.06427e-05	1200419	1201930	1511	-	Glucuronoxylanase XynC	1235803.C825_02491	0	1044	COG5520@1|root,COG5520@2|Bacteria,4NEG7@976|Bacteroidetes,2FMDC@200643|Bacteroidia,22WKT@171551|Porphyromonadaceae	976|Bacteroidetes	M	O-Glycosyl hydrolase family 30	NA	Glyco_hydr_30_2,Glyco_hydro_30C
8.26383	0.840318	0.190253	4.41684	1.00156e-05	0.00016302	1202316	1203191	875	-	HTH-type transcriptional activator RhaS	1235803.C825_02492	2.01e-209	578	COG2207@1|root,COG2207@2|Bacteria,4NEVG@976|Bacteroidetes,2FN82@200643|Bacteroidia,22WI8@171551|Porphyromonadaceae	976|Bacteroidetes	K	helix_turn_helix, arabinose operon control protein	NA	AraC_binding,HTH_18
7.02323	0.620356	0.283284	2.18987	0.0285333	0.0940283	1203272	1203970	698	-	hypothetical protein	1235803.C825_02493	2.07e-177	493	COG0823@1|root,COG0823@2|Bacteria,4NGH4@976|Bacteroidetes,2FN8G@200643|Bacteroidia	976|Bacteroidetes	U	WD40-like Beta Propeller Repeat	NA	PD40
7.55059	0.153065	0.189612	0.807252	0.419521	0.622482	1203973	1205016	1043	-	hypothetical protein	1235803.C825_02494	4.86e-261	714	COG3021@1|root,COG3021@2|Bacteria,4NHB3@976|Bacteroidetes,2FMQG@200643|Bacteroidia,22ZBB@171551|Porphyromonadaceae	976|Bacteroidetes	S	Endonuclease/Exonuclease/phosphatase family	NA	Exo_endo_phos
7.85924	0.673661	0.15142	4.44895	8.62911e-06	0.00014262	1205162	1205902	740	+	3-oxoacyl-[acyl-carrier-protein] reductase FabG	1235803.C825_02495	4.31e-177	493	COG1028@1|root,COG1028@2|Bacteria,4NKYV@976|Bacteroidetes,2FNI3@200643|Bacteroidia,22Z6A@171551|Porphyromonadaceae	976|Bacteroidetes	IQ	Enoyl-(Acyl carrier protein) reductase	NA	adh_short_C2
7.6587	-0.114461	0.273063	-0.419176	0.675088	0.811962	1206087	1206734	647	-	hypothetical protein	411477.PARMER_01658	5.12e-79	244	2C8MF@1|root,2ZKMZ@2|Bacteria,4P812@976|Bacteroidetes,2FVI1@200643|Bacteroidia	976|Bacteroidetes	NA	NA	NA	NA
8.0894	0.806381	0.156676	5.14681	2.6495e-07	6.62995e-06	1206903	1208297	1394	+	hypothetical protein	1235803.C825_02497	0	931	COG0793@1|root,COG0793@2|Bacteria,4NFKJ@976|Bacteroidetes,2FNZE@200643|Bacteroidia,22Y3M@171551|Porphyromonadaceae	976|Bacteroidetes	M	Peptidase family S41	NA	PDZ,PDZ_2,Peptidase_S41
6.38323	0.473778	0.470159	1.0077	0.3136	0.518951	1208383	1208931	548	+	RNA polymerase sigma-H factor	1235803.C825_02498	3.14e-127	362	COG1595@1|root,COG1595@2|Bacteria,4NQCH@976|Bacteroidetes,2G2VX@200643|Bacteroidia,22XNA@171551|Porphyromonadaceae	976|Bacteroidetes	K	Sigma-70, region 4	NA	Sigma70_r2,Sigma70_r4_2
7.49153	0.767482	0.211526	3.62831	0.000285286	0.00259372	1208921	1210204	1283	+	hypothetical protein	1235803.C825_02499	4.74e-304	829	COG3147@1|root,COG3147@2|Bacteria,4NR05@976|Bacteroidetes,2FMFP@200643|Bacteroidia,22XTN@171551|Porphyromonadaceae	976|Bacteroidetes	S	Outer membrane protein beta-barrel domain	NA	OMP_b-brl,OMP_b-brl_2
7.92358	1.21617	0.242516	5.01479	5.30912e-07	1.22545e-05	1210246	1211511	1265	+	hypothetical protein	1235803.C825_02500	1.05e-305	853	COG5276@1|root,COG5276@2|Bacteria,4NG4W@976|Bacteroidetes,2FNZ8@200643|Bacteroidia,22XIA@171551|Porphyromonadaceae	976|Bacteroidetes	S	LVIVD repeat	NA	LVIVD
8.27764	0.746039	0.159412	4.67995	2.8695e-06	5.29867e-05	1211602	1214133	2531	-	hypothetical protein	1235803.C825_02501	0	1729	COG1554@1|root,COG1554@2|Bacteria,4NKKJ@976|Bacteroidetes,2G2PR@200643|Bacteroidia	976|Bacteroidetes	G	hydrolase, family 65, central catalytic	NA	Glyco_hyd_65N_2
7.67599	0.581014	0.212378	2.73576	0.00622365	0.0298587	1214143	1214556	413	-	hypothetical protein	1235803.C825_02502	1.25e-102	296	2A1EM@1|root,30PMX@2|Bacteria,4NNUG@976|Bacteroidetes	976|Bacteroidetes	NA	NA	NA	NA
8.26292	0.489688	0.164389	2.97883	0.00289354	0.0163621	1214969	1216882	1913	-	hypothetical protein	1235803.C825_02503	0	1312	COG0614@1|root,COG0614@2|Bacteria,4NIP6@976|Bacteroidetes,2G2NK@200643|Bacteroidia,22X84@171551|Porphyromonadaceae	976|Bacteroidetes	P	SusD family	NA	SusD-like_3,SusD_RagB
8.39049	0.777515	0.190738	4.07635	4.57482e-05	0.000580525	1216903	1220346	3443	-	TonB-dependent receptor P3	1235803.C825_02504	0	2282	COG4206@1|root,COG4206@2|Bacteria,4P258@976|Bacteroidetes,2FWW6@200643|Bacteroidia,23270@171551|Porphyromonadaceae	976|Bacteroidetes	H	TonB-dependent Receptor Plug Domain	NA	CarbopepD_reg_2,Plug,TonB_dep_Rec
4.777	1.02627	1.72737	0.594122	0.552431	0.729018	1220730	1221038	308	-	hypothetical protein	1235803.C825_05070	4.29e-64	196	COG3547@1|root,COG3547@2|Bacteria,4PB8R@976|Bacteroidetes,2FYNJ@200643|Bacteroidia	976|Bacteroidetes	L	Transposase (IS116 IS110 IS902 family)	NA	NA
0.898535	1.40611	3.79885	0.370142	0.711277	0.833952	1221035	1221988	953	-	IS110 family transposase ISGka2	1235803.C825_05069	8.73e-233	640	COG3547@1|root,COG3547@2|Bacteria,4NJ8G@976|Bacteroidetes,2FRWC@200643|Bacteroidia,2320J@171551|Porphyromonadaceae	976|Bacteroidetes	L	Transposase	NA	DEDD_Tnp_IS110,Transposase_20
8.28536	2.08025	0.20707	10.0461	9.55916e-24	4.65357e-21	1222090	1223259	1169	-	hypothetical protein	1235803.C825_02507	9.06e-260	714	COG3712@1|root,COG3712@2|Bacteria,4NE6N@976|Bacteroidetes,2FQ9J@200643|Bacteroidia,22Y6U@171551|Porphyromonadaceae	976|Bacteroidetes	PT	Domain of unknown function (DUF4974)	NA	DUF4974,FecR
8.22508	1.9737	0.245715	8.03246	9.55352e-16	1.27898e-13	1223286	1223834	548	-	hypothetical protein	1235803.C825_02508	7.51e-128	364	COG1595@1|root,COG1595@2|Bacteria,4NQJ8@976|Bacteroidetes,2FSSP@200643|Bacteroidia,231PN@171551|Porphyromonadaceae	976|Bacteroidetes	K	Sigma-70, region 4	NA	Sigma70_r2,Sigma70_r4_2
8.61245	0.449365	0.161396	2.78423	0.00536546	0.0261915	1224249	1224905	656	+	Transaldolase	1235803.C825_02509	3.56e-153	430	COG0176@1|root,COG0176@2|Bacteria,4NFVZ@976|Bacteroidetes,2FNM3@200643|Bacteroidia,22X0U@171551|Porphyromonadaceae	976|Bacteroidetes	F	Transaldolase is important for the balance of metabolites in the pentose-phosphate pathway	tal	TAL_FSA
8.51833	0.0222985	0.193449	0.115268	0.908233	0.95327	1225219	1226127	908	+	hypothetical protein	1235803.C825_02510	8.56e-196	545	COG5464@1|root,COG5464@2|Bacteria,4NHKS@976|Bacteroidetes,2FPNY@200643|Bacteroidia,22XCI@171551|Porphyromonadaceae	976|Bacteroidetes	S	PD-(D/E)XK nuclease family transposase	NA	PDDEXK_2
7.75263	0.418857	0.61951	0.676111	0.49897	0.684598	1226668	1226964	296	+	hypothetical protein	1235803.C825_02511	6.23e-62	190	2F41S@1|root,33WTF@2|Bacteria,4P3JS@976|Bacteroidetes,2FTP2@200643|Bacteroidia	976|Bacteroidetes	NA	NA	NA	NA
7.90577	0.0699615	0.276583	0.252949	0.800308	0.893029	1226970	1227299	329	+	hypothetical protein	1235803.C825_02512	5.66e-70	211	2F5UM@1|root,33YDJ@2|Bacteria,4P3VQ@976|Bacteroidetes,2FSTP@200643|Bacteroidia	976|Bacteroidetes	NA	NA	NA	NA
8.96055	0.0566823	0.322292	0.175873	0.860394	0.927231	1228160	1228354	194	-	hypothetical protein	411490.ANACAC_02402	9.33e-18	80.9	COG1533@1|root,COG1533@2|Bacteria,1UZF6@1239|Firmicutes,24DZE@186801|Clostridia	186801|Clostridia	L	Psort location Cytoplasmic, score	NA	Radical_SAM
8.20809	0.419829	0.144145	2.91254	0.00358502	0.0192555	1228447	1229736	1289	-	hypothetical protein	1235803.C825_02514	2.11e-305	840	2DVS4@1|root,33WYI@2|Bacteria,4P3H8@976|Bacteroidetes,2FR1M@200643|Bacteroidia	976|Bacteroidetes	S	Protein of unknown function (DUF3945)	NA	DUF3945,DUF4099
8.35756	1.27149	0.235706	5.39436	6.87682e-08	2.05728e-06	1230114	1231379	1265	+	3',5'-cyclic adenosine monophosphate phosphodiesterase CpdA	1235803.C825_02515	4.44e-305	857	COG1409@1|root,COG1409@2|Bacteria,4PJZ2@976|Bacteroidetes,2FTHB@200643|Bacteroidia	976|Bacteroidetes	S	Calcineurin-like phosphoesterase superfamily domain	NA	Metallophos_2
7.18133	1.00324	0.305694	3.28186	0.00103126	0.00714928	1231381	1232322	941	+	hypothetical protein	1235803.C825_02516	8.6e-222	612	2A7KC@1|root,30WIA@2|Bacteria,4P9Y1@976|Bacteroidetes,2FVQS@200643|Bacteroidia	976|Bacteroidetes	NA	NA	NA	NA
7.47299	1.58342	0.253674	6.24196	4.32116e-10	2.14258e-08	1232324	1233229	905	+	hypothetical protein	1235803.C825_02517	5.54e-212	586	2AWX0@1|root,31NUI@2|Bacteria,4NPM4@976|Bacteroidetes,2FUH7@200643|Bacteroidia	976|Bacteroidetes	NA	NA	NA	NA
7.21825	1.01292	0.273427	3.70454	0.000211771	0.0020694	1233229	1234056	827	+	hypothetical protein	1235803.C825_02518	1.78e-204	565	2CCFG@1|root,318N7@2|Bacteria,4PBJS@976|Bacteroidetes,2FTUM@200643|Bacteroidia	976|Bacteroidetes	NA	NA	NA	NA
8.34405	1.50047	0.140836	10.654	1.67085e-26	8.94742e-24	1234059	1236053	1994	+	hypothetical protein	1235803.C825_02519	0	1334	2ER46@1|root,33IPR@2|Bacteria,4PFE4@976|Bacteroidetes,2FS2A@200643|Bacteroidia	976|Bacteroidetes	NA	NA	NA	NA
8.35718	0.786432	0.160484	4.90038	9.56505e-07	2.11656e-05	1236205	1237701	1496	-	hypothetical protein	1235803.C825_02520	0	983	COG3505@1|root,COG3505@2|Bacteria,4NFHI@976|Bacteroidetes,2FMIB@200643|Bacteroidia,22WUG@171551|Porphyromonadaceae	976|Bacteroidetes	U	Type IV secretory system Conjugative DNA transfer	NA	T4SS-DNA_transf,TraG-D_C,TrwB_AAD_bind,YWFCY
7.8512	0.912137	0.532024	1.71446	0.0864434	0.213714	1238086	1238211	125	-	hypothetical protein	999419.HMPREF1077_02055	9.97e-25	92	COG3505@1|root,COG3505@2|Bacteria,4P79U@976|Bacteroidetes,2FUKU@200643|Bacteroidia	976|Bacteroidetes	U	YWFCY protein	NA	YWFCY
7.59192	0.434525	0.228212	1.90405	0.0569042	0.155154	1238259	1239440	1181	-	hypothetical protein	1235803.C825_02522	3.68e-277	758	COG3843@1|root,COG3843@2|Bacteria,4P1WA@976|Bacteroidetes,2G2CE@200643|Bacteroidia	976|Bacteroidetes	U	Relaxase/Mobilisation nuclease domain	NA	Relaxase
7.03295	-1.03148	1.46217	-0.705445	0.480534	0.673498	1239492	1239584	92	-	hypothetical protein	1235788.C802_04245	2.07e-13	62.8	28X19@1|root,2ZJ02@2|Bacteria,4P79V@976|Bacteroidetes,2FW3J@200643|Bacteroidia,4AUYG@815|Bacteroidaceae	976|Bacteroidetes	NA	NA	NA	NA
9.65902	0.522924	0.37572	1.39179	0.163985	0.33364	1239847	1240023	176	-	hypothetical protein	1235803.C825_02524	1.08e-35	120	2C3PR@1|root,34AHF@2|Bacteria,4P6FS@976|Bacteroidetes,2FU44@200643|Bacteroidia	976|Bacteroidetes	NA	NA	NA	NA
9.08976	0.286304	0.323563	0.88485	0.376237	0.582635	1240778	1240870	92	+	hypothetical protein	1235803.C825_03281	4.73e-10	54.3	2A7QU@1|root,30WPK@2|Bacteria,4PA2Y@976|Bacteroidetes,2FW21@200643|Bacteroidia	976|Bacteroidetes	NA	NA	NA	NA
3.86152	8.32246	3.49584	2.38067	0.017281	0.0644427	1240955	1241074	119	+	hypothetical protein	1235803.C825_02526	3.36e-20	80.5	2DE3S@1|root,2ZKDG@2|Bacteria,4P869@976|Bacteroidetes,2FUSV@200643|Bacteroidia	976|Bacteroidetes	NA	NA	NA	NA
5.15072	-2.48387	1.11673	-2.22422	0.0261334	0.0880708	1241138	1241548	410	+	hypothetical protein	1235803.C825_02527	4.72e-93	271	COG1192@1|root,COG1192@2|Bacteria,4NGV8@976|Bacteroidetes,2FMZX@200643|Bacteroidia,22XDV@171551|Porphyromonadaceae	976|Bacteroidetes	D	CobQ/CobB/MinD/ParA nucleotide binding domain	NA	AAA_31,CbiA
5.96423	0.750032	0.531959	1.40994	0.158557	0.324941	1241551	1242045	494	+	hypothetical protein	1235803.C825_02528	9.62e-111	318	2DUTS@1|root,33S7G@2|Bacteria,4P0ZK@976|Bacteroidetes,2FRV7@200643|Bacteroidia	976|Bacteroidetes	S	Protein of unknown function (DUF3408)	NA	DUF3408
8.17232	0.538289	0.209216	2.57288	0.0100855	0.0434847	1242049	1242987	938	+	hypothetical protein	1235803.C825_02529	2.1e-217	600	2F04N@1|root,33T8A@2|Bacteria,4P20A@976|Bacteroidetes,2FNM8@200643|Bacteroidia	976|Bacteroidetes	NA	NA	NA	NA
7.55098	-0.294975	0.332576	-0.88694	0.375111	0.581523	1243462	1243761	299	+	hypothetical protein	1235803.C825_02530	1.78e-57	179	2AV4I@1|root,33YC1@2|Bacteria,4P36I@976|Bacteroidetes,2FTAC@200643|Bacteroidia	976|Bacteroidetes	S	Domain of unknown function (DUF4134)	traE	DUF4134
4.82313	-7.68574	2.43614	-3.15489	0.00160558	0.01026	1243785	1243931	146	+	hypothetical protein	226186.BT_4768	2.09e-23	90.9	293NS@1|root,31AD2@2|Bacteria,4NP31@976|Bacteroidetes,2FTA2@200643|Bacteroidia,4ARN5@815|Bacteroidaceae	976|Bacteroidetes	S	Domain of unknown function (DUF4133)	NA	DUF4133
7.92412	0.152983	0.689471	0.221885	0.824404	0.904833	1244111	1244281	170	+	hypothetical protein	1235803.C825_02532	4.37e-32	111	COG3451@1|root,COG3451@2|Bacteria	2|Bacteria	U	multi-organism process	traC	AAA_10,DUF3875,TraC_F_IV
8.09419	0.613401	0.172343	3.55919	0.000372003	0.00317209	1244564	1246135	1571	+	hypothetical protein	1235803.C825_02533	0	1054	COG3451@1|root,COG3451@2|Bacteria,4NER7@976|Bacteroidetes,2FM54@200643|Bacteroidia,22VZ4@171551|Porphyromonadaceae	976|Bacteroidetes	U	conjugation system ATPase	NA	AAA_10,DUF3875
7.92528	0.627477	0.244072	2.57087	0.0101444	0.0437034	1246157	1246507	350	+	hypothetical protein	1235803.C825_02534	1.51e-75	226	COG3451@1|root,COG3451@2|Bacteria,4NER7@976|Bacteroidetes,2FM54@200643|Bacteroidia,22VZ4@171551|Porphyromonadaceae	976|Bacteroidetes	U	conjugation system ATPase	NA	AAA_10,DUF3875
3.91616	1.03019	2.12251	0.485365	0.627418	0.779722	1247076	1248899	1823	+	Group II intron-encoded protein LtrA	1235803.C825_03292	0	1144	COG1403@1|root,COG3344@1|root,COG1403@2|Bacteria,COG3344@2|Bacteria,4NG38@976|Bacteroidetes,2FNYW@200643|Bacteroidia,22ZMP@171551|Porphyromonadaceae	976|Bacteroidetes	L	Type II intron maturase	NA	Intron_maturas2,RVT_1
6.00291	1.61553	2.71573	0.594877	0.551925	0.729018	1249144	1249275	131	+	hypothetical protein	1235788.C802_04233	1.89e-23	89	2BWR1@1|root,2ZF0G@2|Bacteria,4P9B8@976|Bacteroidetes,2FV8R@200643|Bacteroidia,4ASAY@815|Bacteroidaceae	976|Bacteroidetes	NA	NA	NA	NA
2.47859	1.93407	3.75007	0.515743	0.606034	0.765109	1249276	1249551	275	+	hypothetical protein	1235803.C825_02537	3.08e-61	187	2F378@1|root,33W1R@2|Bacteria,4P3M9@976|Bacteroidetes,2FT4F@200643|Bacteroidia	1235803.C825_02537|-	NA	NA	NA	NA
7.60421	0.0913975	0.496215	0.184189	0.853865	0.92354	1249568	1249768	200	+	hypothetical protein	1235803.C825_02538	2.55e-36	123	COG5314@1|root,COG5314@2|Bacteria	2|Bacteria	U	conjugation	traI	DUF4141
5.90006	0.292224	0.561073	0.520831	0.602484	0.76308	1252058	1252600	542	+	hypothetical protein	999419.HMPREF1077_02074	8.04e-129	365	COG5314@1|root,COG5314@2|Bacteria,4NF40@976|Bacteroidetes,2FNDM@200643|Bacteroidia,22WY1@171551|Porphyromonadaceae	976|Bacteroidetes	U	Domain of unknown function (DUF4141)	NA	DUF4141
7.18365	0.11254	0.285571	0.394088	0.693516	0.822623	1252624	1253637	1013	+	hypothetical protein	1235803.C825_02541	3.64e-226	625	28IE2@1|root,2Z8G6@2|Bacteria,4NFI5@976|Bacteroidetes,2FMZM@200643|Bacteroidia,22WJV@171551|Porphyromonadaceae	976|Bacteroidetes	S	Conjugative transposon TraJ protein	NA	CtnDOT_TraJ
7.29131	0.351399	0.293713	1.1964	0.23154	0.422795	1253816	1254289	473	+	hypothetical protein	1235803.C825_02543	9.4e-110	315	COG3701@1|root,COG3701@2|Bacteria,4NFVT@976|Bacteroidetes,2FMF8@200643|Bacteroidia,22WWQ@171551|Porphyromonadaceae	976|Bacteroidetes	U	Conjugative transposon TraK protein	NA	VirB8
7.52623	0.170597	0.236955	0.719955	0.471553	0.666974	1254553	1255404	851	+	hypothetical protein	1235803.C825_02544	3.76e-185	516	28HNW@1|root,2Z7X2@2|Bacteria,4NG2R@976|Bacteroidetes,2FMTP@200643|Bacteroidia,22VUZ@171551|Porphyromonadaceae	976|Bacteroidetes	S	Conjugative transposon TraM protein	traM	Transposon_TraM
4.48827	1.39112	2.15612	0.645195	0.518801	0.702502	1255417	1255821	404	+	hypothetical protein	999419.HMPREF1077_02080	4.74e-83	246	28HNW@1|root,2Z7X2@2|Bacteria,4NG2R@976|Bacteroidetes,2FMTP@200643|Bacteroidia,22VUZ@171551|Porphyromonadaceae	976|Bacteroidetes	S	Conjugative transposon TraM protein	traM	Transposon_TraM
7.04857	0.224203	0.274432	0.816971	0.413945	0.61858	1255826	1256725	899	+	hypothetical protein	1235803.C825_02545	5.77e-213	588	COG3504@1|root,COG3504@2|Bacteria,4NH1R@976|Bacteroidetes,2G2B5@200643|Bacteroidia	976|Bacteroidetes	U	Domain of unknown function (DUF4138)	NA	DUF4138
6.58579	0.089865	0.402119	0.223478	0.823163	0.904298	1256760	1257338	578	+	hypothetical protein	1235803.C825_02546	4.97e-138	390	28JHB@1|root,33T1X@2|Bacteria,4P1TU@976|Bacteroidetes,2FQXR@200643|Bacteroidia	976|Bacteroidetes	S	Conjugative transposon protein TraO	NA	TraO
6.35683	-0.188067	0.568804	-0.330636	0.740919	0.855924	1257365	1257826	461	+	hypothetical protein	1235803.C825_02547	5.28e-105	303	28M8P@1|root,33TH3@2|Bacteria,4P0D1@976|Bacteroidetes,2FQHH@200643|Bacteroidia	976|Bacteroidetes	S	Domain of unknown function, B. Theta Gene description (DUF3872)	NA	DUF3872
7.60873	0.477991	0.208191	2.29593	0.0216801	0.0765809	1257984	1258895	911	+	Protease HtpX	1235803.C825_02548	4.36e-210	581	COG0501@1|root,COG0501@2|Bacteria,4P07G@976|Bacteroidetes,2FPSG@200643|Bacteroidia	976|Bacteroidetes	O	Peptidase family M48	NA	Peptidase_M48
7.80736	0.728624	0.285483	2.55225	0.0107029	0.0453791	1258917	1259378	461	-	hypothetical protein	1235803.C825_02549	2.94e-111	319	2EY7A@1|root,33RFT@2|Bacteria,4P27B@976|Bacteroidetes,2FQ5Z@200643|Bacteroidia	976|Bacteroidetes	NA	NA	NA	NA
7.95159	0.318519	0.263456	1.209	0.226662	0.416246	1259747	1259959	212	-	hypothetical protein	1235803.C825_02550	2.54e-46	148	2F68M@1|root,33YSG@2|Bacteria,4P4FV@976|Bacteroidetes,2FTSI@200643|Bacteroidia	976|Bacteroidetes	NA	NA	NA	NA
6.54175	0.553313	0.573574	0.964676	0.334707	0.541497	1260109	1260333	224	-	hypothetical protein	357276.EL88_16600	7.13e-39	130	2DYI6@1|root,349WJ@2|Bacteria,4P6EJ@976|Bacteroidetes,2FYTC@200643|Bacteroidia	976|Bacteroidetes	NA	NA	NA	NA
5.75423	0.182168	0.626716	0.29067	0.771303	0.876742	1260416	1260940	524	-	hypothetical protein	1235803.C825_02552	3.8e-112	339	COG1475@1|root,COG1475@2|Bacteria,4NHT0@976|Bacteroidetes,2FMSU@200643|Bacteroidia	976|Bacteroidetes	K	Belongs to the ParB family	NA	ParBc
7.52069	0.337135	0.190882	1.76619	0.0773632	0.195877	1260889	1262319	1430	-	Nucleoid occlusion protein	1235803.C825_02552	2.9e-297	823	COG1475@1|root,COG1475@2|Bacteria,4NHT0@976|Bacteroidetes,2FMSU@200643|Bacteroidia	976|Bacteroidetes	K	Belongs to the ParB family	NA	ParBc
6.26165	-0.205587	0.475172	-0.432658	0.665263	0.804899	1262346	1262936	590	-	hypothetical protein	1235803.C825_02553	3.78e-153	428	29RXT@1|root,30D23@2|Bacteria,4NPVW@976|Bacteroidetes,2FMZP@200643|Bacteroidia,22XXD@171551|Porphyromonadaceae	976|Bacteroidetes	NA	NA	NA	NA
7.39477	0.84597	0.2287	3.69904	0.00021642	0.00209193	1263001	1264014	1013	-	hypothetical protein	1235803.C825_02554	1.08e-243	669	2E57E@1|root,32ZZZ@2|Bacteria,4P02J@976|Bacteroidetes,2FP1S@200643|Bacteroidia,22Z60@171551|Porphyromonadaceae	976|Bacteroidetes	S	Psort location Cytoplasmic, score 8.96	NA	NA
7.94574	0.649501	0.518849	1.25181	0.210638	0.395917	1264048	1264341	293	-	hypothetical protein	1235803.C825_02555	1.04e-55	174	2F8T3@1|root,34157@2|Bacteria,4P47Y@976|Bacteroidetes,2FTZN@200643|Bacteroidia	976|Bacteroidetes	NA	NA	NA	NA
8.51939	0.809353	0.218611	3.70225	0.000213699	0.00207905	1264761	1265057	296	+	hypothetical protein	NA	NA	NA	NA	NA	NA	NA	NA	NA
8.4385	0.491686	0.172692	2.84719	0.00441071	0.022383	1265225	1266976	1751	-	hypothetical protein	1235803.C825_02557	0	1115	COG2207@1|root,COG2207@2|Bacteria,4NJI3@976|Bacteroidetes,2FN3U@200643|Bacteroidia	976|Bacteroidetes	K	transcriptional regulator (AraC	NA	HTH_18,TPR_12,TPR_8
8.16815	0.348258	0.162913	2.1377	0.0325413	0.104284	1267427	1268572	1145	+	hypothetical protein	999419.HMPREF1077_02095	8.06e-259	711	2BKJI@1|root,32F0S@2|Bacteria,4PAS1@976|Bacteroidetes,2FXM9@200643|Bacteroidia	976|Bacteroidetes	NA	NA	NA	NA
6.368	0.383932	0.492677	0.779277	0.435816	0.638768	1268588	1269373	785	+	hypothetical protein	999419.HMPREF1077_02096	1.05e-180	503	2A53C@1|root,30TRU@2|Bacteria,4PF56@976|Bacteroidetes,2FWGX@200643|Bacteroidia	976|Bacteroidetes	NA	NA	NA	NA
7.41286	-0.179863	0.218818	-0.821973	0.411093	0.616121	1269381	1270679	1298	+	hypothetical protein	1235803.C825_02560	0	889	COG0793@1|root,COG0793@2|Bacteria,4NJJX@976|Bacteroidetes,2FUYP@200643|Bacteroidia	976|Bacteroidetes	M	Peptidase family S41	NA	Peptidase_S41
6.85929	-0.016582	0.3614	-0.0458828	0.963404	0.982298	1270723	1271433	710	+	hypothetical protein	1203611.KB894544_gene2118	7.07e-76	236	2DT11@1|root,33I7P@2|Bacteria,4NY8D@976|Bacteroidetes	976|Bacteroidetes	S	Outer membrane protein beta-barrel domain	NA	OMP_b-brl_2
7.36241	0.324633	0.241302	1.34534	0.178515	0.35314	1271469	1272596	1127	+	hypothetical protein	999419.HMPREF1077_02099	2.62e-245	676	2DEVB@1|root,2ZPDJ@2|Bacteria	2|Bacteria	NA	NA	NA	NA
7.65436	0.461687	0.179399	2.57352	0.010067	0.0434748	1272687	1273982	1295	+	Adenine permease AdeP	1235803.C825_02563	5.95e-284	779	COG2252@1|root,COG2252@2|Bacteria,4NGCG@976|Bacteroidetes,2FNYM@200643|Bacteroidia,22WKC@171551|Porphyromonadaceae	976|Bacteroidetes	S	Permease	yieG	Xan_ur_permease
6.37093	-0.270065	0.444811	-0.607145	0.543755	0.72361	1274004	1274576	572	+	hypothetical protein	1235803.C825_02564	2.2e-140	395	COG0675@1|root,COG0675@2|Bacteria	2|Bacteria	L	Transposase, IS605 OrfB family	NA	DUF4178,HTH_OrfB_IS605
8.00518	0.266307	0.167866	1.58643	0.112643	0.255919	1274599	1277124	2525	+	hypothetical protein	1122990.BAJH01000042_gene2772	5.34e-05	55.8	2ENTM@1|root,33GET@2|Bacteria,4PPQK@976|Bacteroidetes,2FVB0@200643|Bacteroidia	2|Bacteria	S	Major fimbrial subunit protein (FimA)	NA	P_gingi_FimA
7.49306	-0.143761	0.231198	-0.621809	0.534068	0.715699	1277149	1278453	1304	+	hypothetical protein	NA	NA	NA	NA	NA	NA	NA	NA	NA
3.47522	-0.395689	2.71576	-0.145701	0.884157	0.938858	1278559	1279677	1118	+	IS110 family transposase ISAzo28	1235803.C825_05534	5.16e-271	741	COG3547@1|root,COG3547@2|Bacteria,4NMIB@976|Bacteroidetes,2G37Z@200643|Bacteroidia,22Z06@171551|Porphyromonadaceae	976|Bacteroidetes	L	Transposase, IS116 IS110 IS902 family	NA	DEDD_Tnp_IS110,Transposase_20
7.97045	0.804555	0.228181	3.52596	0.000421956	0.00350175	1280312	1280737	425	+	hypothetical protein	NA	NA	NA	NA	NA	NA	NA	NA	NA
7.54536	0.429744	0.222307	1.93311	0.0532223	0.147442	1280740	1282146	1406	+	hypothetical protein	1408473.JHXO01000007_gene997	3.01e-07	61.2	COG0467@1|root,COG0467@2|Bacteria,4NKT5@976|Bacteroidetes,2FP2U@200643|Bacteroidia	976|Bacteroidetes	T	COG NOG06399 non supervised orthologous group	NA	NA
6.95231	-0.00413073	0.293003	-0.0140979	0.988752	0.995631	1282143	1283027	884	+	hypothetical protein	1235803.C825_02570	4.5e-203	563	2EQ6H@1|root,33HST@2|Bacteria,4NYWU@976|Bacteroidetes,2FSEM@200643|Bacteroidia,230AN@171551|Porphyromonadaceae	976|Bacteroidetes	NA	NA	NA	LpoB
6.54338	-0.147526	0.489066	-0.301649	0.76292	0.870352	1283060	1283647	587	+	hypothetical protein	1235803.C825_02571	5.35e-139	392	COG0675@1|root,COG0675@2|Bacteria	2|Bacteria	L	Transposase, IS605 OrfB family	NA	NA
6.92716	-0.148991	0.36299	-0.410456	0.681471	0.815481	1283679	1284410	731	+	hypothetical protein	999419.HMPREF1077_02107	3.56e-141	402	2F3D3@1|root,33W71@2|Bacteria,4P2ZW@976|Bacteroidetes,2FXTQ@200643|Bacteroidia,230FB@171551|Porphyromonadaceae	976|Bacteroidetes	NA	NA	NA	NA
7.53991	0.248937	0.198828	1.25202	0.210562	0.395913	1284480	1285790	1310	+	hypothetical protein	1235803.C825_02573	0	902	COG2931@1|root,COG2931@2|Bacteria,4P1UY@976|Bacteroidetes,2FUMS@200643|Bacteroidia	976|Bacteroidetes	Q	Clostripain family	NA	Peptidase_C11
6.52267	0.311973	0.520049	0.59989	0.548579	0.7266	1285827	1286366	539	+	hypothetical protein	1235803.C825_02574	3.04e-128	364	COG0675@1|root,COG0675@2|Bacteria	2|Bacteria	L	Transposase, IS605 OrfB family	NA	OrfB_Zn_ribbon
7.26441	0.497154	0.264203	1.88171	0.0598752	0.161365	1286396	1287457	1061	+	hypothetical protein	1235803.C825_02575	2.83e-263	720	COG1744@1|root,COG1744@2|Bacteria,4NS2A@976|Bacteroidetes,2FTIT@200643|Bacteroidia	976|Bacteroidetes	S	ABC transporter substrate-binding protein PnrA-like	NA	Bmp
8.09928	0.420095	0.168103	2.49903	0.0124534	0.0506363	1287438	1289564	2126	+	hypothetical protein	1235803.C825_02576	0	1422	COG0683@1|root,COG5206@1|root,COG0683@2|Bacteria,COG5206@2|Bacteria,4NITZ@976|Bacteroidetes,2FRBP@200643|Bacteroidia,22ZP2@171551|Porphyromonadaceae	976|Bacteroidetes	EO	Peptidase C13 family	NA	ANF_receptor,Peptidase_C13,Peripla_BP_6
7.62475	0.42968	0.221958	1.93586	0.052885	0.146888	1289891	1290379	488	+	hypothetical protein	NA	NA	NA	NA	NA	NA	NA	NA	NA
7.01909	0.0366826	0.412233	0.0889852	0.929094	0.963644	1290407	1291153	746	+	hypothetical protein	1235803.C825_02578	2.82e-183	509	COG2843@1|root,COG2843@2|Bacteria,4NTVG@976|Bacteroidetes,2FU9C@200643|Bacteroidia	976|Bacteroidetes	M	D-alanyl-D-alanine carboxypeptidase	NA	Peptidase_M15_4
8.17021	0.573227	0.205855	2.78462	0.00535912	0.0261844	1291262	1293637	2375	+	Sensor histidine kinase RcsC	1235803.C825_02579	0	1511	COG0642@1|root,COG0745@1|root,COG0745@2|Bacteria,COG2205@2|Bacteria,4NFEF@976|Bacteroidetes,2FNF0@200643|Bacteroidia	976|Bacteroidetes	T	ATPase histidine kinase DNA gyrase B HSP90 domain protein	NA	HATPase_c,HisKA,Response_reg
7.88827	0.672881	0.174712	3.85136	0.000117462	0.00127072	1293609	1294907	1298	+	Transcriptional regulatory protein ZraR	1235803.C825_02580	1.23e-305	854	COG2204@1|root,COG2204@2|Bacteria,4NE89@976|Bacteroidetes,2FMCJ@200643|Bacteroidia,22X7M@171551|Porphyromonadaceae	976|Bacteroidetes	T	COG2204 Response regulator containing CheY-like receiver AAA-type ATPase and DNA-binding domains	NA	HTH_8,Response_reg,Sigma54_activat
7.74134	0.51778	0.268904	1.92552	0.0541641	0.149049	1295103	1295732	629	+	hypothetical protein	1235803.C825_02581	1.06e-145	410	2EWAX@1|root,33PPM@2|Bacteria,4P29J@976|Bacteroidetes,2FQGM@200643|Bacteroidia	976|Bacteroidetes	S	RteC protein	NA	RteC
5.36418	-8.22684	1.94299	-4.2341	2.29465e-05	0.000330446	1295845	1296051	206	+	hypothetical protein	1235803.C825_02582	4.45e-46	147	2FJXQ@1|root,34BK3@2|Bacteria,4P5PH@976|Bacteroidetes,2FVBA@200643|Bacteroidia	976|Bacteroidetes	NA	NA	NA	NA
7.36199	-0.0672795	0.292115	-0.230319	0.817844	0.90127	1296163	1297197	1034	+	hypothetical protein	1235803.C825_02583	5.56e-245	673	290FF@1|root,2ZN4N@2|Bacteria,4NN0G@976|Bacteroidetes,2FMEY@200643|Bacteroidia	976|Bacteroidetes	NA	NA	NA	NA
6.44148	0.377784	0.444504	0.8499	0.395381	0.602353	1297380	1298096	716	+	hypothetical protein	999419.HMPREF1077_02120	2.92e-171	478	2FBSQ@1|root,343XH@2|Bacteria,4P5QV@976|Bacteroidetes,2FNYF@200643|Bacteroidia	976|Bacteroidetes	NA	NA	NA	NA
5.24609	0.621549	1.26558	0.491119	0.623343	0.777907	1298108	1298437	329	+	hypothetical protein	999419.HMPREF1077_02121	1.05e-74	223	2F3PG@1|root,33WGD@2|Bacteria,4P3IV@976|Bacteroidetes,2FSV9@200643|Bacteroidia	976|Bacteroidetes	NA	NA	NA	NA
7.8218	0.870911	0.249873	3.48542	0.000491373	0.00395091	1298495	1299232	737	+	hypothetical protein	1235803.C825_02586	3.56e-180	501	2EWQS@1|root,33Q2J@2|Bacteria,4P1U5@976|Bacteroidetes,2FR6D@200643|Bacteroidia	976|Bacteroidetes	NA	NA	NA	NA
7.63667	0.0213274	0.784565	0.0271837	0.978313	0.990025	1299409	1299528	119	+	hypothetical protein	1235803.C825_02587	7.96e-19	77	295ZP@1|root,2ZTAE@2|Bacteria,4P7HT@976|Bacteroidetes,2FVHU@200643|Bacteroidia	976|Bacteroidetes	NA	NA	NA	NA
7.01805	1.21988	0.362858	3.36186	0.00077418	0.00573773	1299698	1300000	302	+	hypothetical protein	1235803.C825_02588	1.34e-66	202	2DXVA@1|root,346TE@2|Bacteria,4P5Q0@976|Bacteroidetes,2FTB2@200643|Bacteroidia	976|Bacteroidetes	S	Helix-turn-helix domain	NA	HTH_17
8.03234	0.399436	0.182245	2.19174	0.0283979	0.0936974	1300073	1301302	1229	-	Tyrosine recombinase XerC	1235803.C825_02589	6.69e-304	827	COG0582@1|root,COG4974@1|root,COG0582@2|Bacteria,COG4974@2|Bacteria,4NVIT@976|Bacteroidetes,2FPK7@200643|Bacteroidia	976|Bacteroidetes	L	Belongs to the 'phage' integrase family	NA	Arm-DNA-bind_5,Phage_int_SAM_5,Phage_integrase
8.27985	0.648353	0.138412	4.68423	2.81016e-06	5.24335e-05	1301621	1304041	2420	-	hypothetical protein	1235803.C825_02590	0	1588	COG0577@1|root,COG0577@2|Bacteria,4NDUK@976|Bacteroidetes,2FN93@200643|Bacteroidia,22WTA@171551|Porphyromonadaceae	976|Bacteroidetes	V	FtsX-like permease family	NA	FtsX,MacB_PCD
8.04207	0.463774	0.177083	2.61897	0.00881968	0.0392271	1304048	1306498	2450	-	hypothetical protein	1235803.C825_02591	0	1610	COG0577@1|root,COG0577@2|Bacteria,4NDUK@976|Bacteroidetes,2FN93@200643|Bacteroidia,22WTA@171551|Porphyromonadaceae	976|Bacteroidetes	V	FtsX-like permease family	NA	FtsX,MacB_PCD
7.32854	0.870973	0.237362	3.66939	0.000243129	0.00231664	1306585	1307442	857	+	hypothetical protein	1235803.C825_02592	1.19e-198	551	COG2204@1|root,COG2204@2|Bacteria,4NE89@976|Bacteroidetes,2FMRV@200643|Bacteroidia,22W60@171551|Porphyromonadaceae	976|Bacteroidetes	T	COG2204 Response regulator containing CheY-like receiver AAA-type ATPase and DNA-binding domains	NA	HTH_8,Response_reg,Sigma54_activat
7.79827	0.729886	0.181531	4.02074	5.80167e-05	0.000724194	1307533	1309230	1697	-	hypothetical protein	1235803.C825_02593	0	1146	COG3591@1|root,COG4412@1|root,COG3591@2|Bacteria,COG4412@2|Bacteria,4NG2K@976|Bacteroidetes,2FNQS@200643|Bacteroidia,22XGI@171551|Porphyromonadaceae	976|Bacteroidetes	E	Leucine-rich repeat (LRR) protein	NA	Trypsin,Trypsin_2
7.14623	0.362859	0.273589	1.32629	0.184743	0.362381	1309176	1310096	920	-	hypothetical protein	1235803.C825_02594	5.25e-233	639	COG3591@1|root,COG3591@2|Bacteria,4NG2K@976|Bacteroidetes,2FNQS@200643|Bacteroidia,22XGI@171551|Porphyromonadaceae	976|Bacteroidetes	E	Leucine-rich repeat (LRR) protein	NA	Trypsin,Trypsin_2
7.95639	0.76623	0.183341	4.17925	2.92473e-05	0.000399539	1310149	1311465	1316	-	hypothetical protein	1235803.C825_02598	3.87e-77	253	298AE@1|root,2ZVFY@2|Bacteria,4P8XC@976|Bacteroidetes,2FMW3@200643|Bacteroidia	976|Bacteroidetes	NA	NA	NA	DUF4933,DUF5128
8.04396	1.03447	0.207403	4.98774	6.10901e-07	1.38618e-05	1311629	1312858	1229	+	hypothetical protein	1235803.C825_02596	4.07e-305	858	2A58H@1|root,30TXN@2|Bacteria,4NPD1@976|Bacteroidetes,2FQJR@200643|Bacteroidia,22Y14@171551|Porphyromonadaceae	976|Bacteroidetes	S	6-bladed beta-propeller	NA	DUF5128
7.84056	0.746695	0.176592	4.22836	2.354e-05	0.00033712	1312919	1314226	1307	-	hypothetical protein	1235803.C825_02597	0	884	298AE@1|root,2ZVFY@2|Bacteria,4P8XC@976|Bacteroidetes	976|Bacteroidetes	NA	NA	NA	DUF4933,DUF5128
7.90084	0.8622	0.16276	5.29736	1.17487e-07	3.27678e-06	1314352	1315659	1307	-	hypothetical protein	1235803.C825_02598	0	877	298AE@1|root,2ZVFY@2|Bacteria,4P8XC@976|Bacteroidetes,2FMW3@200643|Bacteroidia	976|Bacteroidetes	NA	NA	NA	DUF4933,DUF5128
8.01953	1.34206	0.206697	6.49288	8.4211e-11	4.64897e-09	1315735	1316940	1205	-	hypothetical protein	1235803.C825_02599	5.92e-303	824	2A58H@1|root,30TXN@2|Bacteria,4NPD1@976|Bacteroidetes,2FQJR@200643|Bacteroidia,22Y14@171551|Porphyromonadaceae	976|Bacteroidetes	S	6-bladed beta-propeller	NA	DUF5128
8.21137	1.05226	0.243756	4.31687	1.58256e-05	0.000242826	1317111	1318733	1622	-	hypothetical protein	1235803.C825_02600	0	1031	COG0457@1|root,COG0457@2|Bacteria,4NRRJ@976|Bacteroidetes,2FRD4@200643|Bacteroidia,22YBM@171551|Porphyromonadaceae	976|Bacteroidetes	S	Tetratricopeptide repeat protein	NA	NA
8.2115	0.590974	0.165759	3.56527	0.000363487	0.00310914	1318769	1321465	2696	-	hypothetical protein	1235803.C825_02601	0	1845	COG1506@1|root,COG1506@2|Bacteria,4NDVD@976|Bacteroidetes,2FPXW@200643|Bacteroidia,22WN5@171551|Porphyromonadaceae	976|Bacteroidetes	E	Prolyl oligopeptidase family	NA	Peptidase_S9
8.10902	0.746348	0.15773	4.7318	2.22534e-06	4.30205e-05	1321578	1323524	1946	-	Thiol-disulfide oxidoreductase ResA	1235803.C825_02602	0	1308	COG0526@1|root,COG0526@2|Bacteria,4NK4H@976|Bacteroidetes,2FNIK@200643|Bacteroidia,22WX2@171551|Porphyromonadaceae	976|Bacteroidetes	CO	Thioredoxin-like	NA	Redoxin,Thioredoxin,Thioredoxin_8
7.9707	0.696677	0.233688	2.98122	0.00287101	0.0162518	1323545	1324774	1229	-	Thiol-disulfide oxidoreductase ResA	1235803.C825_02603	9.36e-295	804	COG0526@1|root,COG0526@2|Bacteria,4NMSZ@976|Bacteroidetes,2FPQE@200643|Bacteroidia,22XXU@171551|Porphyromonadaceae	976|Bacteroidetes	CO	Domain of unknown function (DUF4369)	NA	AhpC-TSA,DUF4369
7.52546	0.781767	0.191653	4.07908	4.52151e-05	0.000575123	1324914	1325588	674	-	putative ABC transporter ATP-binding protein YknY	1235803.C825_02604	3.97e-153	431	COG1136@1|root,COG1136@2|Bacteria,4NFDW@976|Bacteroidetes,2FMDA@200643|Bacteroidia,22XHP@171551|Porphyromonadaceae	976|Bacteroidetes	V	Rad17 cell cycle checkpoint protein	NA	ABC_tran
6.84918	0.513425	0.527467	0.973378	0.330365	0.537233	1325744	1326322	578	-	ECF RNA polymerase sigma factor RpoE	1235803.C825_02605	8.18e-128	364	COG1595@1|root,COG1595@2|Bacteria,4NN4K@976|Bacteroidetes,2FS8Z@200643|Bacteroidia,22Y1J@171551|Porphyromonadaceae	976|Bacteroidetes	K	Sigma-70, region 4	fecI	Sigma70_r2,Sigma70_r4,Sigma70_r4_2
5.24276	1.69672	1.52772	1.11062	0.266732	0.465261	1326319	1326711	392	-	hypothetical protein	1235803.C825_02606	2.12e-93	272	2E5Q2@1|root,330EP@2|Bacteria,4NUMS@976|Bacteroidetes,2FUW0@200643|Bacteroidia,22YU0@171551|Porphyromonadaceae	976|Bacteroidetes	NA	NA	NA	NA
5.30719	0.294786	1.83731	0.160445	0.872531	0.933748	1326735	1326956	221	-	hypothetical protein	1235803.C825_02607	1.46e-33	116	2A83N@1|root,30X4C@2|Bacteria,4PAG1@976|Bacteroidetes,2FZ9A@200643|Bacteroidia	976|Bacteroidetes	C	4Fe-4S dicluster domain	NA	Fer4
7.20943	0.559421	0.331022	1.68998	0.0910319	0.221681	1327113	1327880	767	+	NADH pyrophosphatase	1235803.C825_02608	2.72e-189	525	COG2816@1|root,COG2816@2|Bacteria,4NKCV@976|Bacteroidetes,2FN61@200643|Bacteroidia,22YHY@171551|Porphyromonadaceae	976|Bacteroidetes	L	NADH pyrophosphatase zinc ribbon domain	nudC	NUDIX,NUDIX-like,zf-NADH-PPase
7.00346	0.113132	0.275546	0.410573	0.681386	0.815481	1327911	1328738	827	-	hypothetical protein	1235803.C825_02609	5.43e-190	528	COG3209@1|root,COG3209@2|Bacteria,4P540@976|Bacteroidetes,2FZA2@200643|Bacteroidia,231A9@171551|Porphyromonadaceae	976|Bacteroidetes	M	COG3209 Rhs family protein	NA	NA
6.87739	0.0574368	0.321187	0.178826	0.858074	0.925946	1328757	1329263	506	-	hypothetical protein	NA	NA	NA	NA	NA	NA	NA	NA	NA
7.61578	0.730861	0.203308	3.59485	0.000324578	0.00287292	1329408	1330142	734	-	hypothetical protein	1235803.C825_02611	1.83e-177	494	COG0204@1|root,COG0204@2|Bacteria,4NHC8@976|Bacteroidetes,2FPUB@200643|Bacteroidia,22X82@171551|Porphyromonadaceae	976|Bacteroidetes	I	Phosphate acyltransferases	plsC	Acyltransferase
7.04723	0.293956	0.330568	0.889247	0.37387	0.580886	1330232	1330765	533	-	hypothetical protein	272559.BF9343_1335	0.000705	47	2EXTY@1|root,33R39@2|Bacteria,4P01A@976|Bacteroidetes,2FNDH@200643|Bacteroidia,4AN8A@815|Bacteroidaceae	976|Bacteroidetes	S	COG NOG28261 non supervised orthologous group	NA	DUF4858
8.1638	0.749853	0.138604	5.41004	6.30099e-08	1.91715e-06	1330843	1331937	1094	-	Thiol-disulfide oxidoreductase ResA	1235803.C825_02613	1.21e-265	727	COG0526@1|root,COG0526@2|Bacteria,4NEX3@976|Bacteroidetes,2FN8N@200643|Bacteroidia,22XAM@171551|Porphyromonadaceae	976|Bacteroidetes	CO	Antioxidant, AhpC TSA family	NA	AhpC-TSA,DUF4369,Thioredoxin_8
8.2362	0.652501	0.144924	4.50238	6.71962e-06	0.000115332	1332257	1334590	2333	-	hypothetical protein	1235803.C825_02614	0	1508	COG0577@1|root,COG0577@2|Bacteria,4P04X@976|Bacteroidetes,2FM7X@200643|Bacteroidia,22ZDY@171551|Porphyromonadaceae	976|Bacteroidetes	V	MacB-like periplasmic core domain	NA	FtsX,MacB_PCD
8.04596	0.520064	0.168568	3.08519	0.00203422	0.0123787	1334602	1337004	2402	-	hypothetical protein	1235803.C825_02615	0	1588	COG0577@1|root,COG0577@2|Bacteria,4P0SY@976|Bacteroidetes,2FS0I@200643|Bacteroidia	976|Bacteroidetes	V	MacB-like periplasmic core domain	NA	FtsX,MacB_PCD
8.08539	0.483565	0.137066	3.52797	0.000418763	0.00348752	1337028	1339424	2396	-	hypothetical protein	1235803.C825_02616	0	1535	COG0577@1|root,COG0577@2|Bacteria,4NKVT@976|Bacteroidetes,2G2XN@200643|Bacteroidia,22Z46@171551|Porphyromonadaceae	976|Bacteroidetes	V	MacB-like periplasmic core domain	NA	FtsX,MacB_PCD
8.24592	0.697967	0.160375	4.35208	1.3485e-05	0.000213015	1339570	1341942	2372	-	hypothetical protein	1235803.C825_02617	0	1517	COG0577@1|root,COG0577@2|Bacteria,4NKVT@976|Bacteroidetes,2G2XN@200643|Bacteroidia,22Z46@171551|Porphyromonadaceae	976|Bacteroidetes	V	MacB-like periplasmic core domain	NA	FtsX,MacB_PCD
7.50033	0.0402835	0.209156	0.192601	0.847272	0.918449	1342010	1343062	1052	-	hypothetical protein	1235803.C825_02618	1.69e-258	707	2EB6B@1|root,33571@2|Bacteria,4NUZD@976|Bacteroidetes,2FV59@200643|Bacteroidia,22YYC@171551|Porphyromonadaceae	976|Bacteroidetes	S	TolB-like 6-blade propeller-like	NA	TolB_like
8.21499	1.18938	0.144413	8.23596	1.78121e-16	2.8054e-14	1343079	1345391	2312	-	hypothetical protein	1235803.C825_02619	0	1498	COG0577@1|root,COG0577@2|Bacteria,4NZYM@976|Bacteroidetes,2FMU0@200643|Bacteroidia,231YZ@171551|Porphyromonadaceae	976|Bacteroidetes	V	FtsX-like permease family	NA	FtsX,MacB_PCD
7.96204	0.597127	0.146275	4.08222	4.46066e-05	0.000570275	1345399	1347705	2306	-	hypothetical protein	1235803.C825_02620	0	1512	COG0577@1|root,COG0577@2|Bacteria,4NZYM@976|Bacteroidetes,2FMU0@200643|Bacteroidia,231YZ@171551|Porphyromonadaceae	976|Bacteroidetes	V	FtsX-like permease family	NA	FtsX,MacB_PCD
7.99973	0.182969	0.150081	1.21913	0.222793	0.410832	1347717	1350044	2327	-	hypothetical protein	1235803.C825_02621	0	1514	COG0577@1|root,COG0577@2|Bacteria,4NZYM@976|Bacteroidetes,2FMU0@200643|Bacteroidia,231YZ@171551|Porphyromonadaceae	976|Bacteroidetes	V	FtsX-like permease family	NA	FtsX,MacB_PCD
8.28417	0.256923	0.154976	1.65782	0.0973531	0.232013	1350295	1353171	2876	+	Tol-Pal system protein TolB	1235803.C825_02623	0	1956	COG0823@1|root,COG0823@2|Bacteria,4NGPR@976|Bacteroidetes,2FNGJ@200643|Bacteroidia,22VZG@171551|Porphyromonadaceae	976|Bacteroidetes	U	Involved in the tonB-independent uptake of proteins	NA	NA
8.29385	0.28854	0.187026	1.54278	0.122884	0.271852	1353752	1356127	2375	-	hypothetical protein	1235803.C825_02624	0	1513	COG0577@1|root,COG0577@2|Bacteria,4NDUK@976|Bacteroidetes,2FNCY@200643|Bacteroidia,2302K@171551|Porphyromonadaceae	976|Bacteroidetes	V	MacB-like periplasmic core domain	NA	FtsX,MacB_PCD
7.89703	0.204056	0.157051	1.2993	0.193841	0.374375	1356232	1358631	2399	-	hypothetical protein	1235803.C825_02625	0	1557	COG0577@1|root,COG0577@2|Bacteria,4NDUK@976|Bacteroidetes,2FNCY@200643|Bacteroidia,2302K@171551|Porphyromonadaceae	976|Bacteroidetes	V	MacB-like periplasmic core domain	NA	FtsX,MacB_PCD
7.32238	0.0159403	0.225883	0.0705688	0.943741	0.970814	1358642	1359892	1250	-	hypothetical protein	1235803.C825_02626	1.27e-291	797	COG0845@1|root,COG0845@2|Bacteria,4NDUH@976|Bacteroidetes,2FM9Q@200643|Bacteroidia,22X9B@171551|Porphyromonadaceae	976|Bacteroidetes	M	Barrel-sandwich domain of CusB or HlyD membrane-fusion	NA	Biotin_lipoyl_2,HlyD_3,HlyD_D23
7.73417	0.310859	0.163163	1.9052	0.0567535	0.154979	1359896	1361374	1478	-	hypothetical protein	1235803.C825_02627	0	945	COG1538@1|root,COG1538@2|Bacteria,4NGXM@976|Bacteroidetes,2FMD9@200643|Bacteroidia,22WDN@171551|Porphyromonadaceae	976|Bacteroidetes	MU	Outer membrane efflux protein	NA	OEP
7.66473	0.0262048	0.194707	0.134586	0.892939	0.943506	1361552	1362916	1364	+	Transcriptional regulatory protein ZraR	1235803.C825_02628	0	869	COG2204@1|root,COG2204@2|Bacteria,4NE89@976|Bacteroidetes,2FMTU@200643|Bacteroidia,22WJK@171551|Porphyromonadaceae	976|Bacteroidetes	T	Sigma-54 interaction domain	NA	HTH_8,Response_reg,Sigma54_activat
7.0322	-0.51378	0.346846	-1.48129	0.138529	0.29496	1362913	1363914	1001	+	Adaptive-response sensory-kinase SasA	1235803.C825_02629	4.61e-227	627	COG5000@1|root,COG5000@2|Bacteria,4NE49@976|Bacteroidetes,2G2UI@200643|Bacteroidia,231JX@171551|Porphyromonadaceae	976|Bacteroidetes	T	GHKL domain	zraS_1	HATPase_c,HisKA
8.06212	0.48945	0.171704	2.85054	0.00436447	0.0222738	1363922	1366594	2672	-	Sensor histidine kinase RcsC	1235803.C825_02630	0	1739	COG0642@1|root,COG0745@1|root,COG2984@1|root,COG0745@2|Bacteria,COG2205@2|Bacteria,COG2984@2|Bacteria,4NE05@976|Bacteroidetes,2FN0Q@200643|Bacteroidia,2323X@171551|Porphyromonadaceae	976|Bacteroidetes	T	His Kinase A (phosphoacceptor) domain	NA	HATPase_c,HisKA
8.22884	0.445978	0.155719	2.86399	0.00418336	0.0216653	1366698	1369088	2390	-	hypothetical protein	1235803.C825_02631	0	1588	COG1629@1|root,COG4771@2|Bacteria,4NE4M@976|Bacteroidetes,2FNUY@200643|Bacteroidia,22VV4@171551|Porphyromonadaceae	976|Bacteroidetes	P	Carboxypeptidase regulatory-like domain	NA	CarbopepD_reg_2,Plug,TonB_dep_Rec
7.90247	0.86197	0.262365	3.28538	0.00101844	0.00707361	1369394	1370095	701	+	tRNA 5-methylaminomethyl-2-thiouridine biosynthesis bifunctional protein MnmC	1235803.C825_02632	6.64e-170	474	COG4121@1|root,COG4121@2|Bacteria,4NE5S@976|Bacteroidetes,2FM5I@200643|Bacteroidia,22XPJ@171551|Porphyromonadaceae	976|Bacteroidetes	S	S-adenosyl-L-methionine-dependent methyltransferase	mnmC	Methyltransf_30
4.64089	0.525609	2.13522	0.246161	0.805557	0.895714	1370090	1370404	314	-	Thioredoxin	1235803.C825_02633	3.35e-71	214	COG3118@1|root,COG3118@2|Bacteria,4NQ5B@976|Bacteroidetes,2FTV5@200643|Bacteroidia,22YCQ@171551|Porphyromonadaceae	976|Bacteroidetes	O	Belongs to the thioredoxin family	trxA	Thioredoxin
8.17023	-0.0774191	0.152732	-0.506896	0.612228	0.76947	1370477	1374280	3803	-	DNA polymerase III subunit alpha	1235803.C825_02634	0	2523	COG0587@1|root,COG0587@2|Bacteria,4NFA0@976|Bacteroidetes,2FNND@200643|Bacteroidia,22X3C@171551|Porphyromonadaceae	976|Bacteroidetes	L	DNA-directed DNA polymerase	dnaE	DNA_pol3_alpha,HHH_6,PHP,RNase_T,tRNA_anti-codon
8.1583	0.538297	0.200665	2.68256	0.007306	0.0341691	1374478	1375119	641	+	hypothetical protein	1235803.C825_02635	2.23e-149	420	2BJ2E@1|root,32DB4@2|Bacteria,4PHK0@976|Bacteroidetes,2FVQ9@200643|Bacteroidia	976|Bacteroidetes	S	Outer membrane protein beta-barrel domain	NA	OMP_b-brl_2
7.21635	0.713961	0.29849	2.39191	0.016761	0.063033	1375396	1375851	455	+	50S ribosomal protein L13	1235803.C825_02636	4.91e-109	313	COG0102@1|root,COG0102@2|Bacteria,4NNGA@976|Bacteroidetes,2FS3I@200643|Bacteroidia,22XMC@171551|Porphyromonadaceae	976|Bacteroidetes	J	This protein is one of the early assembly proteins of the 50S ribosomal subunit, although it is not seen to bind rRNA by itself. It is important during the early stages of 50S assembly	rplM	Ribosomal_L13
6.27344	0.655637	0.515045	1.27297	0.203029	0.386224	1375857	1376243	386	+	30S ribosomal protein S9	1235803.C825_02637	8.7e-83	245	COG0103@1|root,COG0103@2|Bacteria,4NNN1@976|Bacteroidetes,2FSGZ@200643|Bacteroidia,22XV9@171551|Porphyromonadaceae	976|Bacteroidetes	J	Belongs to the universal ribosomal protein uS9 family	rpsI	Ribosomal_S9
7.82982	0.436576	0.230087	1.89744	0.0577698	0.157034	1376380	1377225	845	+	30S ribosomal protein S2	1235803.C825_02638	1.74e-189	527	COG0052@1|root,COG0052@2|Bacteria,4NER0@976|Bacteroidetes,2FM4T@200643|Bacteroidia,22WM5@171551|Porphyromonadaceae	976|Bacteroidetes	J	Belongs to the universal ribosomal protein uS2 family	rpsB	Ribosomal_S2
7.65161	0.428249	0.218212	1.96253	0.0497006	0.140077	1377384	1378373	989	+	Elongation factor Ts	1235803.C825_02639	2.66e-224	619	COG0264@1|root,COG0264@2|Bacteria,4NF03@976|Bacteroidetes,2FNAD@200643|Bacteroidia,22W7D@171551|Porphyromonadaceae	976|Bacteroidetes	J	Associates with the EF-Tu.GDP complex and induces the exchange of GDP to GTP. It remains bound to the aminoacyl-tRNA.EF- Tu.GTP complex up to the GTP hydrolysis stage on the ribosome	tsf	EF_TS
7.46428	0.129926	0.218875	0.593608	0.552774	0.729018	1378461	1379654	1193	-	Aspartate/prephenate aminotransferase	1235803.C825_02640	3.09e-287	784	COG0436@1|root,COG0436@2|Bacteria,4NENS@976|Bacteroidetes,2FMU2@200643|Bacteroidia,22VY5@171551|Porphyromonadaceae	976|Bacteroidetes	E	Aminotransferase	aspC	Aminotran_1_2
7.559	-0.0384088	0.214797	-0.178814	0.858084	0.925946	1379736	1380953	1217	-	Riboflavin biosynthesis protein RibBA	1235803.C825_02641	5.62e-294	802	COG0108@1|root,COG0807@1|root,COG0108@2|Bacteria,COG0807@2|Bacteria,4NF6I@976|Bacteroidetes,2FNS0@200643|Bacteroidia,22WUR@171551|Porphyromonadaceae	976|Bacteroidetes	H	Catalyzes the conversion of D-ribulose 5-phosphate to formate and 3,4-dihydroxy-2-butanone 4-phosphate	ribBA	DHBP_synthase,GTP_cyclohydro2
7.91105	0.193018	0.149007	1.29536	0.195196	0.375593	1380961	1382901	1940	-	hypothetical protein	1235803.C825_02642	0	1250	COG0795@1|root,COG0795@2|Bacteria,4NE8B@976|Bacteroidetes,2FP6P@200643|Bacteroidia,22XC3@171551|Porphyromonadaceae	976|Bacteroidetes	S	Permease, YjgP YjgQ family	NA	YjgP_YjgQ
7.62277	0.992011	0.623153	1.59192	0.111402	0.254052	1383004	1383387	383	-	hypothetical protein	1235803.C825_02643	1.9e-90	264	COG3832@1|root,COG3832@2|Bacteria,4NNY1@976|Bacteroidetes,2FSYB@200643|Bacteroidia,22YFH@171551|Porphyromonadaceae	976|Bacteroidetes	S	Psort location Cytoplasmic, score 8.96	NA	AHSA1
9.92405	0.17534	0.260877	0.672117	0.501509	0.685622	1383586	1383660	74	+	tRNA-Met(cat)	NA	NA	NA	NA	NA	NA	NA	NA	NA
8.60971	0.293011	0.188868	1.55141	0.120804	0.268873	1384291	1384539	248	-	hypothetical protein	NA	NA	NA	NA	NA	NA	NA	NA	NA
7.20945	0.0715773	0.290725	0.246203	0.805525	0.895714	1384647	1385510	863	-	hypothetical protein	1235803.C825_02646	9.93e-208	574	COG3617@1|root,COG3617@2|Bacteria,4PARG@976|Bacteroidetes,2FXJS@200643|Bacteroidia	976|Bacteroidetes	K	BRO family, N-terminal domain	NA	NA
6.4151	0.725078	0.658572	1.10098	0.270903	0.469828	1385545	1385796	251	-	hypothetical protein	411901.BACCAC_01201	0.000313	43.5	2AFB8@1|root,315AN@2|Bacteria,4PJI9@976|Bacteroidetes,2FUA0@200643|Bacteroidia,4AS26@815|Bacteroidaceae	976|Bacteroidetes	NA	NA	NA	NA
6.61264	-0.735119	0.621795	-1.18225	0.237106	0.428519	1386006	1386266	260	+	hypothetical protein	1235803.C825_02648	1.35e-55	173	COG1396@1|root,COG1396@2|Bacteria,4P53C@976|Bacteroidetes,2FZ2P@200643|Bacteroidia	976|Bacteroidetes	K	Cro/C1-type HTH DNA-binding domain	NA	HTH_3
1.75382	6.21474	3.82699	1.62393	0.104391	0.243686	1386283	1386534	251	+	hypothetical protein	1235803.C825_02649	4.61e-57	176	2BA8T@1|root,323NW@2|Bacteria,4P5WD@976|Bacteroidetes,2FUZ1@200643|Bacteroidia	976|Bacteroidetes	S	Domain of unknown function (DUF4160)	NA	DUF4160
7.96221	0.805334	0.221072	3.64285	0.000269632	0.00249407	1386548	1386799	251	+	hypothetical protein	1235803.C825_02650	9.31e-57	176	2DNIK@1|root,32XPR@2|Bacteria,4NS88@976|Bacteroidetes,2FUDW@200643|Bacteroidia	976|Bacteroidetes	S	Protein of unknown function (DUF2442)	NA	DUF2442
8.62329	0.613726	0.178985	3.42891	0.000606005	0.0046364	1387510	1390956	3446	-	hypothetical protein	1235803.C825_02651	0	2150	COG4926@1|root,COG4926@2|Bacteria,4NFC7@976|Bacteroidetes,2FNWJ@200643|Bacteroidia,22YN6@171551|Porphyromonadaceae	976|Bacteroidetes	S	Phage minor structural protein	NA	ILEI
7.36011	-0.0153909	0.381381	-0.0403557	0.96781	0.98454	1391443	1391631	188	-	hypothetical protein	NA	NA	NA	NA	NA	NA	NA	NA	NA
5.20416	0.576648	1.32251	0.436024	0.662819	0.803257	1391621	1391965	344	-	hypothetical protein	1235803.C825_02653	2.63e-66	202	2CAWQ@1|root,33AP4@2|Bacteria,4NXQ3@976|Bacteroidetes,2FVZU@200643|Bacteroidia,2312P@171551|Porphyromonadaceae	976|Bacteroidetes	NA	NA	NA	NA
3.88936	-6.75197	2.88136	-2.34333	0.0191125	0.0695769	1392040	1392303	263	-	hypothetical protein	1235803.C825_02654	2.51e-56	175	29YY5@1|root,30KUX@2|Bacteria,4P9RY@976|Bacteroidetes,2FVD5@200643|Bacteroidia	976|Bacteroidetes	NA	NA	NA	NA
6.81885	1.07605	0.28233	3.8113	0.000138237	0.001443	1392319	1392924	605	-	hypothetical protein	1235803.C825_02655	2.17e-141	399	2AFPC@1|root,315R2@2|Bacteria,4PJWE@976|Bacteroidetes,2FTA3@200643|Bacteroidia	976|Bacteroidetes	NA	NA	NA	NA
8.52938	1.13502	0.183245	6.19399	5.86592e-10	2.80464e-08	1392990	1397027	4037	-	hypothetical protein	1235803.C825_02656	0	2453	COG1196@1|root,COG1196@2|Bacteria,4NF3E@976|Bacteroidetes,2FNYJ@200643|Bacteroidia,22YP9@171551|Porphyromonadaceae	976|Bacteroidetes	D	Psort location OuterMembrane, score	NA	NA
4.99023	1.41659	1.37127	1.03305	0.301578	0.504988	1397045	1397443	398	-	hypothetical protein	1235803.C825_02657	2.28e-89	262	2EMZV@1|root,313UA@2|Bacteria,4PID6@976|Bacteroidetes,2FTY7@200643|Bacteroidia	976|Bacteroidetes	NA	NA	NA	NA
4.95548	1.5931	1.64163	0.970442	0.331826	0.538731	1397440	1397769	329	-	hypothetical protein	1235803.C825_02658	6.88e-71	213	2A9DU@1|root,30YJ5@2|Bacteria,4PCDE@976|Bacteroidetes,2FZWS@200643|Bacteroidia	976|Bacteroidetes	NA	NA	NA	NA
6.41522	0.626325	0.547087	1.14484	0.252277	0.447628	1397839	1398342	503	-	hypothetical protein	1235803.C825_02659	2.01e-118	338	2A90R@1|root,30Y4N@2|Bacteria,4PBVB@976|Bacteroidetes,2FZJT@200643|Bacteroidia	976|Bacteroidetes	NA	NA	NA	NA
5.12318	-0.911734	1.59949	-0.570017	0.568666	0.738918	1398353	1398832	479	-	hypothetical protein	1235803.C825_02660	5.22e-117	334	2DRJI@1|root,33C1H@2|Bacteria,4P7A3@976|Bacteroidetes	976|Bacteroidetes	NA	NA	NA	VRR_NUC
7.02827	0.32785	0.266207	1.23156	0.218113	0.404851	1398832	1399872	1040	-	hypothetical protein	1235803.C825_02661	2.71e-262	717	COG0358@1|root,COG0358@2|Bacteria,4NEFU@976|Bacteroidetes,2FNW0@200643|Bacteroidia	976|Bacteroidetes	L	COG NOG08810 non supervised orthologous group	NA	zf-CHC2
5.87318	-0.249359	1.02169	-0.244066	0.80718	0.896216	1399883	1400215	332	-	hypothetical protein	NA	NA	NA	NA	NA	NA	NA	NA	NA
7.54339	0.0289752	0.207015	0.139967	0.888686	0.941614	1400349	1401428	1079	-	hypothetical protein	1235803.C825_02663	1.98e-257	706	2DVSJ@1|root,33WZZ@2|Bacteria,4NPWK@976|Bacteroidetes	976|Bacteroidetes	S	AAA domain	NA	AAA_25
4.39751	2.17753	2.91085	0.748073	0.454416	0.653076	1401445	1401717	272	-	hypothetical protein	1235803.C825_02664	4.43e-56	174	2AKCG@1|root,31B3G@2|Bacteria,4PINC@976|Bacteroidetes,2FV4M@200643|Bacteroidia	976|Bacteroidetes	NA	NA	NA	NA
6.3458	0.693397	0.55729	1.24423	0.213415	0.399174	1401732	1402124	392	-	hypothetical protein	1235803.C825_02665	2.29e-88	259	COG3311@1|root,COG3311@2|Bacteria,4NSAH@976|Bacteroidetes,2FUF3@200643|Bacteroidia,231R1@171551|Porphyromonadaceae	976|Bacteroidetes	K	Helix-turn-helix domain	NA	HTH_17
7.46726	1.19093	0.31851	3.73905	0.000184715	0.00184247	1402301	1402759	458	-	hypothetical protein	NA	NA	NA	NA	NA	NA	NA	NA	NA
8.53957	1.35921	0.193457	7.02592	2.12654e-12	1.58162e-10	1402815	1404005	1190	-	Tyrosine recombinase XerC	1235803.C825_02667	1.54e-291	795	COG4974@1|root,COG4974@2|Bacteria,4NIV4@976|Bacteroidetes,2FNQI@200643|Bacteroidia,22XJM@171551|Porphyromonadaceae	976|Bacteroidetes	L	Phage integrase SAM-like domain	NA	Arm-DNA-bind_5,Phage_int_SAM_5,Phage_integrase
7.88355	0.700376	0.182172	3.8446	0.000120751	0.00130336	1404424	1404804	380	+	HTH-type transcriptional repressor YtrA	1235803.C825_02668	8.76e-82	242	COG1725@1|root,COG1725@2|Bacteria,4PKHR@976|Bacteroidetes,2G09Z@200643|Bacteroidia,2313V@171551|Porphyromonadaceae	976|Bacteroidetes	K	helix_turn_helix gluconate operon transcriptional repressor	NA	GntR,Peripla_BP_3
7.0898	-0.268421	0.247991	-1.08238	0.279083	0.480389	1404810	1405703	893	+	hypothetical protein	1235803.C825_02669	9.42e-202	560	COG0330@1|root,COG0330@2|Bacteria,4NH8V@976|Bacteroidetes,2FQPC@200643|Bacteroidia,22Z0Q@171551|Porphyromonadaceae	976|Bacteroidetes	O	SPFH Band 7 PHB domain protein	NA	Band_7
7.26377	0.719964	0.291477	2.47006	0.0135091	0.0538775	1405727	1406725	998	+	hypothetical protein	1235803.C825_02670	4.26e-252	690	2DCKM@1|root,2ZEIP@2|Bacteria,4P7DQ@976|Bacteroidetes,2G1Q7@200643|Bacteroidia,23102@171551|Porphyromonadaceae	976|Bacteroidetes	S	TolB-like 6-blade propeller-like	NA	TolB_like
7.27478	0.0936107	0.293823	0.318595	0.750033	0.862018	1406728	1408050	1322	-	Adaptive-response sensory-kinase SasA	1235803.C825_02671	0	868	COG5000@1|root,COG5000@2|Bacteria,4NFQN@976|Bacteroidetes,2FQJW@200643|Bacteroidia,22Z6G@171551|Porphyromonadaceae	976|Bacteroidetes	T	PAS domain	NA	HATPase_c,PAS,PAS_8
7.28275	-0.295585	0.208055	-1.42071	0.155402	0.320561	1408047	1409408	1361	-	Regulatory protein AtoC	1235803.C825_02672	0	892	COG2204@1|root,COG2204@2|Bacteria,4NE89@976|Bacteroidetes,2FMPG@200643|Bacteroidia,231SJ@171551|Porphyromonadaceae	976|Bacteroidetes	T	Sigma-54 interaction domain	NA	HTH_8,Response_reg,Sigma54_activat
7.39739	-0.289104	0.190303	-1.51918	0.128718	0.280882	1409440	1410711	1271	-	hypothetical protein	1235803.C825_02673	4.28e-305	854	COG0577@1|root,COG0577@2|Bacteria,4NHA3@976|Bacteroidetes,2FNQW@200643|Bacteroidia,22ZPJ@171551|Porphyromonadaceae	976|Bacteroidetes	V	FtsX-like permease family	NA	FtsX,MacB_PCD
7.34844	0.385189	0.227158	1.69569	0.0899454	0.220036	1410714	1411979	1265	-	hypothetical protein	1235803.C825_02674	2.19e-290	794	COG0577@1|root,COG0577@2|Bacteria,4NI8K@976|Bacteroidetes,2FN4D@200643|Bacteroidia,231S7@171551|Porphyromonadaceae	976|Bacteroidetes	V	MacB-like periplasmic core domain	NA	FtsX,MacB_PCD
7.97089	-0.050834	0.244402	-0.207993	0.835234	0.910932	1411998	1412666	668	-	putative ABC transporter ATP-binding protein YknY	1235803.C825_02675	3.4e-153	431	COG1136@1|root,COG1136@2|Bacteria,4NFDW@976|Bacteroidetes,2FPST@200643|Bacteroidia,22WS2@171551|Porphyromonadaceae	976|Bacteroidetes	V	ABC transporter, ATP-binding protein	NA	ABC_tran
7.84346	0.08681	0.165388	0.524886	0.599663	0.760946	1413260	1414198	938	-	hypothetical protein	999419.HMPREF1077_00182	3.55e-136	395	2FA05@1|root,347QT@2|Bacteria,4P5V6@976|Bacteroidetes,2FYSR@200643|Bacteroidia,230WN@171551|Porphyromonadaceae	976|Bacteroidetes	S	Fimbrillin-A associated anchor proteins Mfa1 and Mfa2	NA	Mfa2
7.83887	0.6507	0.244284	2.6637	0.00772862	0.0355862	1414251	1414424	173	-	hypothetical protein	NA	NA	NA	NA	NA	NA	NA	NA	NA
8.31278	0.306013	0.172639	1.77256	0.0763011	0.193921	1414955	1415893	938	-	hypothetical protein	999419.HMPREF1077_00182	2.5e-136	395	2FA05@1|root,347QT@2|Bacteria,4P5V6@976|Bacteroidetes,2FYSR@200643|Bacteroidia,230WN@171551|Porphyromonadaceae	976|Bacteroidetes	S	Fimbrillin-A associated anchor proteins Mfa1 and Mfa2	NA	Mfa2
7.52379	0.333604	0.272414	1.22462	0.220718	0.408554	1416089	1416277	188	+	hypothetical protein	NA	NA	NA	NA	NA	NA	NA	NA	NA
8.10961	0.134134	0.146995	0.912506	0.361502	0.569062	1416484	1418550	2066	+	Regulator of RpoS	1235803.C825_02680	0	1230	COG0642@1|root,COG0745@1|root,COG2207@1|root,COG0642@2|Bacteria,COG0745@2|Bacteria,COG2207@2|Bacteria,4P04W@976|Bacteroidetes,2FP7F@200643|Bacteroidia	976|Bacteroidetes	T	cheY-homologous receiver domain	NA	HTH_18,Response_reg
8.6725	0.441407	0.213215	2.07025	0.0384293	0.117594	1418681	1418962	281	-	DNA-binding protein HU 1	1235803.C825_02681	6.43e-55	172	COG0776@1|root,COG0776@2|Bacteria	2|Bacteria	L	regulation of translation	NA	Bac_DNA_binding
8.31312	0.257273	0.203909	1.2617	0.207056	0.391658	1419716	1421284	1568	+	hypothetical protein	1235803.C825_02682	0	1055	COG1672@1|root,COG1672@2|Bacteria,4NIJ4@976|Bacteroidetes,2FM14@200643|Bacteroidia,22VXI@171551|Porphyromonadaceae	976|Bacteroidetes	S	Predicted AAA-ATPase	NA	AAA-ATPase_like,PDDEXK_9
8.14321	0.660709	0.179368	3.68354	0.000230019	0.00220349	1421375	1422283	908	-	hypothetical protein	1235803.C825_02683	6.03e-196	545	COG5464@1|root,COG5464@2|Bacteria,4NGSI@976|Bacteroidetes,2FN70@200643|Bacteroidia,22X6R@171551|Porphyromonadaceae	976|Bacteroidetes	S	PD-(D/E)XK nuclease family transposase	NA	PDDEXK_2
7.7519	0.0196004	0.171628	0.114203	0.909077	0.953783	1422651	1423592	941	+	hypothetical protein	1122931.AUAE01000027_gene2410	3.25e-63	209	2FA05@1|root,3429A@2|Bacteria,4P4HT@976|Bacteroidetes,2FPCP@200643|Bacteroidia,230XE@171551|Porphyromonadaceae	976|Bacteroidetes	S	Fimbrillin-A associated anchor proteins Mfa1 and Mfa2	NA	Mfa2
7.83929	-0.308579	0.179183	-1.72214	0.0850438	0.211239	1423599	1424708	1109	+	Putative fimbrium tip subunit Fim1C	1235803.C825_02685	9.08e-259	710	2DV6Y@1|root,33UEJ@2|Bacteria,4P844@976|Bacteroidetes	976|Bacteroidetes	S	Major fimbrial subunit protein (FimA)	NA	P_gingi_FimA
7.93033	-0.167248	0.202419	-0.826246	0.408665	0.613685	1424933	1425907	974	+	hypothetical protein	NA	NA	NA	NA	NA	NA	NA	NA	NA
8.39187	0.562025	0.23518	2.38976	0.0168592	0.063222	1426152	1426298	146	+	hypothetical protein	NA	NA	NA	NA	NA	NA	NA	NA	NA
7.80723	0.685366	0.235478	2.91053	0.00360819	0.0193412	1426552	1427466	914	+	hypothetical protein	NA	NA	NA	NA	NA	NA	NA	NA	NA
8.40649	0.76179	0.189638	4.01706	5.8928e-05	0.000731195	1427510	1429960	2450	+	hypothetical protein	1235803.C825_02689	0	1613	2F0Y8@1|root,33TZW@2|Bacteria,4P2IB@976|Bacteroidetes,2FPW3@200643|Bacteroidia,230Q4@171551|Porphyromonadaceae	976|Bacteroidetes	S	Domain of unknown function (DUF4906)	NA	DUF4906
8.02615	0.361087	0.279213	1.29323	0.195931	0.376736	1430446	1430838	392	+	hypothetical protein	1235803.C825_02690	1.38e-89	262	COG0776@1|root,COG0776@2|Bacteria,4NRX9@976|Bacteroidetes,2FT5I@200643|Bacteroidia	976|Bacteroidetes	L	DNA-binding protein	NA	Bac_DNA_binding
7.38802	0.981916	0.280887	3.49578	0.000472686	0.00382362	1430882	1431331	449	+	hypothetical protein	1235803.C825_02691	7.57e-103	297	COG0776@1|root,COG0776@2|Bacteria,4NRX9@976|Bacteroidetes,2FT5I@200643|Bacteroidia,230I1@171551|Porphyromonadaceae	976|Bacteroidetes	L	DNA-binding protein	NA	Bac_DNA_binding
7.87679	0.815932	0.198731	4.1057	4.03092e-05	0.000526477	1431593	1432045	452	+	hypothetical protein	1235803.C825_02692	1.65e-102	296	COG0776@1|root,COG0776@2|Bacteria,4NRX9@976|Bacteroidetes,2FT5I@200643|Bacteroidia,230I1@171551|Porphyromonadaceae	976|Bacteroidetes	L	DNA-binding protein	NA	Bac_DNA_binding
4.72604	-0.0826172	1.73434	-0.0476361	0.962006	0.981848	1432147	1432422	275	-	Toxin RelK	1235803.C825_02693	2.17e-61	188	COG4115@1|root,COG4115@2|Bacteria,4NUMR@976|Bacteroidetes,2FUIS@200643|Bacteroidia,230QP@171551|Porphyromonadaceae	976|Bacteroidetes	S	YoeB-like toxin of bacterial type II toxin-antitoxin system	NA	YoeB_toxin
6.96819	-0.0256212	0.505343	-0.0507005	0.959564	0.980998	1432419	1432724	305	-	hypothetical protein	1235803.C825_02694	1.14e-63	194	2DC2N@1|root,2ZCNS@2|Bacteria,4P7FM@976|Bacteroidetes	976|Bacteroidetes	NA	NA	NA	NA
8.29938	0.205617	0.194316	1.05816	0.289983	0.492938	1432993	1433781	788	-	hypothetical protein	1235803.C825_02695	2.49e-184	513	COG5464@1|root,COG5464@2|Bacteria,4NGSI@976|Bacteroidetes,2FN70@200643|Bacteroidia	976|Bacteroidetes	S	Psort location Cytoplasmic, score 8.96	NA	PDDEXK_2
7.91048	-0.430641	0.168614	-2.554	0.0106493	0.0452547	1434143	1435378	1235	+	Tyrosine recombinase XerC	1235803.C825_02696	1.35e-304	829	COG0582@1|root,COG0582@2|Bacteria,4NDZJ@976|Bacteroidetes,2FM4Q@200643|Bacteroidia,22WPV@171551|Porphyromonadaceae	976|Bacteroidetes	L	Belongs to the 'phage' integrase family	NA	Arm-DNA-bind_5,Phage_int_SAM_5,Phage_integrase
5.21356	-1.19304	1.56077	-0.764391	0.444634	0.644913	1435390	1435752	362	+	hypothetical protein	1235803.C825_02697	2.78e-82	243	COG3943@1|root,COG3943@2|Bacteria,4NMH0@976|Bacteroidetes,2FS3B@200643|Bacteroidia,22XTA@171551|Porphyromonadaceae	976|Bacteroidetes	S	COG3943, virulence protein	NA	NA
5.25441	-1.90372	1.49712	-1.27159	0.203517	0.386604	1435831	1436106	275	-	hypothetical protein	1077285.AGDG01000032_gene4283	1.27e-58	182	2BQ1B@1|root,32IVM@2|Bacteria,4NQZI@976|Bacteroidetes,2FSKW@200643|Bacteroidia,4AR3Z@815|Bacteroidaceae	976|Bacteroidetes	S	DNA binding domain, excisionase family	NA	HTH_17
6.62323	-0.384878	1.38513	-0.277865	0.781116	0.882463	1436168	1436467	299	-	hypothetical protein	1235803.C825_02699	3.45e-64	196	2DHWM@1|root,30173@2|Bacteria,4NPMY@976|Bacteroidetes,2FSIB@200643|Bacteroidia,231II@171551|Porphyromonadaceae	976|Bacteroidetes	S	Helix-turn-helix domain	NA	HTH_17
6.87018	-0.0178605	0.535669	-0.0333425	0.973401	0.987789	1436670	1437026	356	+	hypothetical protein	1287488.HMPREF0671_02075	4.84e-73	219	28TJB@1|root,2ZFT4@2|Bacteria,4NNB1@976|Bacteroidetes,2FSHN@200643|Bacteroidia	976|Bacteroidetes	S	DNA binding domain, excisionase family	NA	HTH_17
4.58589	-1.4429	2.16623	-0.666088	0.505355	0.689296	1437066	1437380	314	+	hypothetical protein	1235803.C825_02701	2.19e-67	204	2D42G@1|root,2ZBPH@2|Bacteria,4NMK5@976|Bacteroidetes,2FS2Y@200643|Bacteroidia	976|Bacteroidetes	S	the current gene model (or a revised gene model) may contain a frame shift	NA	HTH_17
7.76025	0.594383	0.201669	2.94732	0.00320543	0.0176777	1437401	1438966	1565	+	hypothetical protein	1235803.C825_02702	0	942	2CI0Q@1|root,2Z86V@2|Bacteria,4NEAY@976|Bacteroidetes,2FN31@200643|Bacteroidia,22WVF@171551|Porphyromonadaceae	976|Bacteroidetes	S	Protein of unknown function (DUF4099)	NA	DUF3945,DUF4099
8.09311	0.424346	0.19701	2.15393	0.0312457	0.100978	1439029	1441119	2090	+	DNA topoisomerase 3	1235803.C825_02703	0	1389	COG0550@1|root,COG0550@2|Bacteria,4NE6R@976|Bacteroidetes,2FMKQ@200643|Bacteroidia,22W8I@171551|Porphyromonadaceae	976|Bacteroidetes	L	DNA topoisomerase	NA	Topoisom_bac,Toprim,Toprim_Crpt
6.39526	-0.599465	0.511679	-1.17156	0.241373	0.434763	1441283	1441735	452	+	hypothetical protein	1235803.C825_02704	1.65e-102	296	2BWP0@1|root,2Z84G@2|Bacteria,4NJQP@976|Bacteroidetes,2FMJA@200643|Bacteroidia	976|Bacteroidetes	S	Psort location Cytoplasmic, score 8.96	NA	DUF1896
8.22408	0.206141	0.184628	1.11652	0.264198	0.462045	1441725	1447256	5531	+	hypothetical protein	1235803.C825_02705	0	3516	COG0553@1|root,COG0827@1|root,COG4646@1|root,COG0553@2|Bacteria,COG0827@2|Bacteria,COG4646@2|Bacteria,4NEQG@976|Bacteroidetes,2FMSW@200643|Bacteroidia,22VYW@171551|Porphyromonadaceae	976|Bacteroidetes	L	Helicase C-terminal domain protein	NA	Helicase_C,N6_Mtase,SNF2_N
5.22858	-1.16718	1.23444	-0.945517	0.344395	0.549861	1447220	1447573	353	+	hypothetical protein	1235803.C825_02705	2.16e-67	227	COG0553@1|root,COG0827@1|root,COG4646@1|root,COG0553@2|Bacteria,COG0827@2|Bacteria,COG4646@2|Bacteria,4NEQG@976|Bacteroidetes,2FMSW@200643|Bacteroidia,22VYW@171551|Porphyromonadaceae	976|Bacteroidetes	L	Helicase C-terminal domain protein	NA	Helicase_C,N6_Mtase,SNF2_N
3.56986	0.171603	1.56757	0.109471	0.912829	0.955473	1448591	1450147	1556	-	IS21 family transposase ISPpu7	1235803.C825_02708	0	1026	COG4565@1|root,COG4584@1|root,COG4565@2|Bacteria,COG4584@2|Bacteria,4NEY6@976|Bacteroidetes,2FMHY@200643|Bacteroidia,22WWS@171551|Porphyromonadaceae	976|Bacteroidetes	L	COGs COG4584 Transposase and inactivated derivatives	NA	HTH_11,HTH_23,rve
6.9726	0.572068	0.355113	1.61095	0.107192	0.247846	1450403	1450771	368	+	hypothetical protein	1235788.C802_00261	9.19e-80	237	COG3682@1|root,COG3682@2|Bacteria,4NNVM@976|Bacteroidetes,2FXMQ@200643|Bacteroidia	976|Bacteroidetes	K	Penicillinase repressor	NA	Penicillinase_R
6.3642	0.630119	0.405688	1.55321	0.120372	0.268147	1450787	1451455	668	+	hypothetical protein	1235803.C825_02710	3.43e-162	453	2BZS9@1|root,2Z92C@2|Bacteria	2|Bacteria	NA	NA	NA	DinB_2
2.6916	7.15254	3.82218	1.87132	0.0613001	0.16446	1451466	1451735	269	+	hypothetical protein	1235803.C825_02711	4.77e-64	194	COG3153@1|root,COG3153@2|Bacteria,4NU0E@976|Bacteroidetes,2FTTC@200643|Bacteroidia	976|Bacteroidetes	S	Putative zinc ribbon domain	NA	Pyrid_ox_like,Zn_ribbon_2
5.03488	-0.206074	1.30991	-0.157319	0.874994	0.934688	1451738	1452199	461	+	hypothetical protein	1235803.C825_02712	5.71e-109	313	COG0346@1|root,COG0346@2|Bacteria	2|Bacteria	E	lactoylglutathione lyase activity	NA	Glyoxalase_2
6.77625	0.291919	0.38739	0.753552	0.451118	0.650616	1452211	1452963	752	+	3'(2'),5'-bisphosphate nucleotidase CysQ	1235803.C825_02713	4.31e-179	498	COG0483@1|root,COG0483@2|Bacteria,4NI6D@976|Bacteroidetes,2FNAK@200643|Bacteroidia,22X9F@171551|Porphyromonadaceae	976|Bacteroidetes	G	Inositol monophosphatase family	NA	Inositol_P
6.31943	0.135662	0.520326	0.260726	0.794304	0.889295	1452960	1453559	599	+	hypothetical protein	1235803.C825_02714	4.04e-136	385	COG1573@1|root,COG1573@2|Bacteria	2|Bacteria	L	deaminated base DNA N-glycosylase activity	NA	UDG
6.69485	-0.0647737	0.460168	-0.140761	0.888059	0.941321	1453581	1454261	680	+	hypothetical protein	1235803.C825_02715	1.58e-169	472	COG3153@1|root,COG3871@1|root,COG3153@2|Bacteria,COG3871@2|Bacteria	2|Bacteria	S	Pyridoxamine 5'-phosphate oxidase	nodA	Acetyltransf_1,NodA,Putative_PNPOx,Pyrid_ox_like,Zn_ribbon_2
7.12584	0.0727564	0.256391	0.283772	0.776585	0.880179	1454329	1455129	800	+	hypothetical protein	1235803.C825_02716	6.18e-196	542	COG2207@1|root,COG2207@2|Bacteria,4NHA5@976|Bacteroidetes,2FQ9X@200643|Bacteroidia,231ZW@171551|Porphyromonadaceae	976|Bacteroidetes	K	helix_turn_helix, arabinose operon control protein	NA	HTH_18,HTH_AraC
6.89489	0.971111	0.385493	2.51914	0.0117642	0.048713	1455211	1455813	602	+	hypothetical protein	1235803.C825_02717	4.05e-141	398	COG1309@1|root,COG1309@2|Bacteria,4NII6@976|Bacteroidetes,2FV42@200643|Bacteroidia	976|Bacteroidetes	K	transcriptional regulator, TetR family	NA	TetR_N
6.28377	0.909567	0.470413	1.93355	0.0531686	0.14737	1455810	1456439	629	+	hypothetical protein	1235803.C825_02718	2.84e-150	422	2EJPK@1|root,3329T@2|Bacteria,4P08A@976|Bacteroidetes,2FWRD@200643|Bacteroidia	976|Bacteroidetes	NA	NA	NA	NA
6.68741	-0.199642	0.320971	-0.621994	0.533946	0.715699	1456436	1457242	806	+	Ion-translocating oxidoreductase complex subunit B	1235803.C825_02719	1.17e-176	494	COG0716@1|root,COG2768@1|root,COG0716@2|Bacteria,COG2768@2|Bacteria,4P1AX@976|Bacteroidetes,2FWZC@200643|Bacteroidia	976|Bacteroidetes	C	Flavodoxin domain	NA	Fer4,Flavodoxin_5
6.74983	0.385717	0.357639	1.07851	0.280806	0.482269	1457336	1457701	365	+	hypothetical protein	1235803.C825_02721	8.58e-82	242	COG3324@1|root,COG3324@2|Bacteria,4NMFV@976|Bacteroidetes,2FTH2@200643|Bacteroidia	976|Bacteroidetes	S	Glyoxalase bleomycin resistance protein dioxygenase	NA	Glyoxalase
8.0781	0.824777	0.170964	4.82428	1.40508e-06	2.92771e-05	1457989	1459338	1349	+	Multidrug resistance protein MdtK	1235803.C825_02722	7.24e-301	823	COG0534@1|root,COG0534@2|Bacteria,4NFIR@976|Bacteroidetes,2FMSA@200643|Bacteroidia,22X5G@171551|Porphyromonadaceae	976|Bacteroidetes	V	COG0534 Na -driven multidrug efflux pump	NA	MatE
7.27262	0.595502	0.242022	2.46053	0.0138732	0.0551119	1459367	1460176	809	+	hypothetical protein	1235803.C825_02723	1.07e-202	560	COG2207@1|root,COG2207@2|Bacteria,4NRFM@976|Bacteroidetes,2FMZV@200643|Bacteroidia,22Y4E@171551|Porphyromonadaceae	976|Bacteroidetes	K	Helix-turn-helix domain	NA	HTH_18
6.26752	0.0145365	0.527944	0.0275341	0.978034	0.990025	1460201	1460776	575	+	hypothetical protein	1235803.C825_02724	1.6e-138	391	COG0664@1|root,COG0664@2|Bacteria	2|Bacteria	T	cyclic nucleotide binding	NA	cNMP_binding
7.97183	0.309169	0.155539	1.98772	0.0468425	0.134068	1460786	1462180	1394	+	hypothetical protein	1235803.C825_02725	0	903	COG1020@1|root,COG1020@2|Bacteria	2|Bacteria	Q	D-alanine [D-alanyl carrier protein] ligase activity	NA	AMP-binding,Condensation,KAsynt_C_assoc,KR,Ketoacyl-synt_C,PP-binding,ketoacyl-synt
6.6869	-2.19959	0.577243	-3.81051	0.000138683	0.00144484	1462421	1462786	365	+	Penicillinase repressor	1235803.C825_02726	8.26e-80	237	COG3682@1|root,COG3682@2|Bacteria,4P2SC@976|Bacteroidetes,2FXNC@200643|Bacteroidia	976|Bacteroidetes	K	Penicillinase repressor	NA	Penicillinase_R
7.45781	-0.00503739	0.219444	-0.0229552	0.981686	0.990595	1462978	1464147	1169	+	hypothetical protein	1235803.C825_02728	9.81e-280	764	COG0810@1|root,COG4219@1|root,COG0810@2|Bacteria,COG4219@2|Bacteria,4NDWS@976|Bacteroidetes,2FNCU@200643|Bacteroidia,22W9Z@171551|Porphyromonadaceae	976|Bacteroidetes	KT	BlaR1 peptidase M56	NA	CarbopepD_reg_2,Peptidase_M56,Plug,TonB_C
7.97243	0.136309	0.26739	0.509775	0.610209	0.768524	1464249	1464614	365	+	hypothetical protein	1235803.C825_02729	2.54e-65	200	2CF4I@1|root,32S18@2|Bacteria,4P946@976|Bacteroidetes,2FU1A@200643|Bacteroidia	976|Bacteroidetes	NA	NA	NA	NA
7.45147	0.367927	0.532186	0.691351	0.489345	0.679612	1464967	1465401	434	+	hypothetical protein	1235803.C825_02730	2.47e-101	293	2C6KM@1|root,3461C@2|Bacteria,4P5B4@976|Bacteroidetes,2FYXG@200643|Bacteroidia	976|Bacteroidetes	S	META domain	NA	META
7.55636	0.38853	0.171194	2.26953	0.0232359	0.0805361	1465398	1466798	1400	+	hypothetical protein	1235803.C825_02731	0	917	COG1073@1|root,COG1073@2|Bacteria,4NFRN@976|Bacteroidetes,2FP0D@200643|Bacteroidia,22WMR@171551|Porphyromonadaceae	976|Bacteroidetes	S	Hydrolase, alpha beta domain protein	NA	BAAT_C,Hydrolase_4
7.93746	0.0616593	0.157555	0.391351	0.695538	0.823845	1466803	1469112	2309	+	Sensor histidine kinase RcsC	1235803.C825_02732	0	1471	COG0642@1|root,COG0745@1|root,COG0745@2|Bacteria,COG2205@2|Bacteria,4NFEF@976|Bacteroidetes,2FNF0@200643|Bacteroidia,22WEZ@171551|Porphyromonadaceae	976|Bacteroidetes	T	ATPase histidine kinase DNA gyrase B HSP90 domain protein	NA	HATPase_c,HisKA,Response_reg
7.38824	0.35453	0.22082	1.60552	0.10838	0.249302	1469129	1470427	1298	+	Transcriptional regulatory protein ZraR	1235803.C825_02733	1.01e-305	852	COG2204@1|root,COG2204@2|Bacteria,4NE89@976|Bacteroidetes,2FMCJ@200643|Bacteroidia	976|Bacteroidetes	T	Sigma-54 interaction domain protein	zraR	HTH_8,Response_reg,Sigma54_activat
7.98476	0.336753	0.222871	1.51098	0.130794	0.284066	1470476	1471360	884	+	hypothetical protein	1235803.C825_02734	4.25e-217	598	28JYP@1|root,2Z9NV@2|Bacteria,4NY0H@976|Bacteroidetes,2FXIG@200643|Bacteroidia	976|Bacteroidetes	S	RES	NA	RES
8.35352	-0.0762009	0.2244	-0.339576	0.734176	0.850792	1471729	1472142	413	+	hypothetical protein	1235803.C825_02735	8.13e-99	286	COG0262@1|root,COG0262@2|Bacteria,4NIGC@976|Bacteroidetes,2FMEN@200643|Bacteroidia,22ZBM@171551|Porphyromonadaceae	976|Bacteroidetes	H	RibD C-terminal domain	NA	RibD_C
7.48794	-0.0451981	0.252475	-0.179021	0.857922	0.925946	1472394	1472999	605	+	hypothetical protein	1235803.C825_02736	7.25e-140	395	28KSX@1|root,2Z89V@2|Bacteria,4NJU0@976|Bacteroidetes,2FPWD@200643|Bacteroidia	976|Bacteroidetes	S	RteC protein	rteC	RteC
7.75025	-0.0862609	0.172463	-0.50017	0.616956	0.772631	1473064	1475073	2009	-	hypothetical protein	1235803.C825_02737	0	1330	COG3505@1|root,COG3505@2|Bacteria,4NFHI@976|Bacteroidetes,2FMIB@200643|Bacteroidia,22WUG@171551|Porphyromonadaceae	976|Bacteroidetes	U	Type IV secretory system Conjugative DNA transfer	NA	T4SS-DNA_transf,TraG-D_C,TrwB_AAD_bind,YWFCY
7.25175	0.0857621	0.294638	0.291076	0.770993	0.876587	1475104	1476351	1247	-	hypothetical protein	1235803.C825_02738	1.7e-300	819	COG3843@1|root,COG3843@2|Bacteria,4NG66@976|Bacteroidetes,2FMZN@200643|Bacteroidia,22W4N@171551|Porphyromonadaceae	976|Bacteroidetes	U	Relaxase mobilization nuclease domain protein	NA	Relaxase
7.44454	-1.0591	0.317495	-3.33581	0.000850527	0.0061967	1476330	1476758	428	-	hypothetical protein	1287488.HMPREF0671_02000	2.12e-92	270	2BXUM@1|root,2Z8XW@2|Bacteria,4NMWD@976|Bacteroidetes,2FMH8@200643|Bacteroidia	976|Bacteroidetes	NA	NA	NA	NA
7.75635	-0.255186	0.180088	-1.41701	0.15648	0.322193	1477180	1478229	1049	+	hypothetical protein	1235803.C825_02740	3.03e-256	702	COG1192@1|root,COG1192@2|Bacteria,4NGV8@976|Bacteroidetes,2FMZX@200643|Bacteroidia,22XDV@171551|Porphyromonadaceae	976|Bacteroidetes	D	CobQ/CobB/MinD/ParA nucleotide binding domain	NA	CbiA
4.8935	0.544075	0.923465	0.589166	0.55575	0.730675	1478216	1478653	437	-	hypothetical protein	NA	NA	NA	NA	NA	NA	NA	NA	NA
4.38782	0.704636	2.58463	0.272626	0.785141	0.884026	1478686	1479027	341	+	hypothetical protein	1235803.C825_02742	2.54e-77	230	2E6X0@1|root,331GG@2|Bacteria,4NUUN@976|Bacteroidetes,2FQ57@200643|Bacteroidia,231VH@171551|Porphyromonadaceae	976|Bacteroidetes	S	Protein of unknown function (DUF3408)	NA	DUF3408
7.21174	0.372752	0.274405	1.3584	0.174337	0.347949	1479044	1479772	728	+	hypothetical protein	1235803.C825_02743	2.76e-162	455	28JK3@1|root,2Z9D0@2|Bacteria,4NKB8@976|Bacteroidetes,2FMWH@200643|Bacteroidia,22XHR@171551|Porphyromonadaceae	976|Bacteroidetes	S	Conjugal transfer protein traD	NA	NA
8.79708	0.426052	0.250258	1.70245	0.0886706	0.217812	1479974	1480210	236	+	hypothetical protein	1235803.C825_02744	3.03e-44	144	2AV4I@1|root,31KUP@2|Bacteria,4NQM2@976|Bacteroidetes,2FT2M@200643|Bacteroidia	976|Bacteroidetes	S	Psort location CytoplasmicMembrane, score	NA	DUF4134
3.71454	-6.5771	2.99526	-2.19584	0.0281037	0.0931283	1482732	1483064	332	+	hypothetical protein	1235803.C825_02747	1.82e-71	215	293NS@1|root,2ZR4G@2|Bacteria,4NP3K@976|Bacteroidetes,2FSK2@200643|Bacteroidia,22Y8R@171551|Porphyromonadaceae	976|Bacteroidetes	S	Conjugative transposon protein TraF	NA	DUF4133
8.19634	0.125444	0.173015	0.725046	0.468424	0.66589	1483061	1485460	2399	+	hypothetical protein	1235803.C825_02748	0	1595	COG3451@1|root,COG3451@2|Bacteria,4NER7@976|Bacteroidetes,2FM54@200643|Bacteroidia,22VZ4@171551|Porphyromonadaceae	976|Bacteroidetes	U	conjugation system ATPase	NA	AAA_10,DUF3875
5.95274	0.0568384	0.603214	0.0942259	0.92493	0.961848	1486028	1487851	1823	+	Group II intron-encoded protein LtrA	1235803.C825_03292	0	1144	COG1403@1|root,COG3344@1|root,COG1403@2|Bacteria,COG3344@2|Bacteria,4NG38@976|Bacteroidetes,2FNYW@200643|Bacteroidia,22ZMP@171551|Porphyromonadaceae	976|Bacteroidetes	L	Type II intron maturase	NA	Intron_maturas2,RVT_1
6.92533	-0.222345	0.397763	-0.558988	0.57617	0.744544	1488110	1488490	380	+	hypothetical protein	1235803.C825_02750	4.69e-86	253	2CA6G@1|root,2ZCDX@2|Bacteria,4NMCN@976|Bacteroidetes,2FRYQ@200643|Bacteroidia,231HZ@171551|Porphyromonadaceae	976|Bacteroidetes	S	Domain of unknown function, B. Theta Gene description (DUF3876)	NA	DUF3876
7.63565	-0.58604	0.29542	-1.98375	0.0472837	0.134827	1488514	1488726	212	+	hypothetical protein	1235803.C825_02751	4.6e-40	132	COG5314@1|root,COG5314@2|Bacteria,4NF40@976|Bacteroidetes,2FNDM@200643|Bacteroidia	976|Bacteroidetes	U	COG NOG09946 non supervised orthologous group	NA	DUF4141
5.53721	0.173857	0.892999	0.194689	0.845637	0.917558	1491016	1491558	542	+	hypothetical protein	1235803.C825_02753	2.31e-128	364	COG5314@1|root,COG5314@2|Bacteria,4NF40@976|Bacteroidetes,2FNDM@200643|Bacteroidia,22WY1@171551|Porphyromonadaceae	976|Bacteroidetes	U	Domain of unknown function (DUF4141)	NA	DUF4141
7.16025	0.045131	0.305767	0.147599	0.882659	0.938383	1491562	1492566	1004	+	hypothetical protein	1287488.HMPREF0671_01950	2.27e-223	617	28IE2@1|root,2Z8G6@2|Bacteria,4NFI5@976|Bacteroidetes,2FMZM@200643|Bacteroidia	976|Bacteroidetes	S	Conjugative transposon TraJ protein	traJ	CtnDOT_TraJ
6.67845	0.676625	0.591413	1.14408	0.252589	0.447886	1492599	1493222	623	+	hypothetical protein	1284775.HMPREF1640_02620	5.07e-143	404	COG3701@1|root,COG3701@2|Bacteria,4NFVT@976|Bacteroidetes,2FMF8@200643|Bacteroidia	976|Bacteroidetes	U	Conjugative transposon TraK protein	NA	NA
2.63718	1.48034	3.74718	0.395054	NA	NA	1493262	1493549	287	+	hypothetical protein	1235803.C825_02756	6.55e-67	202	29QHB@1|root,30BGS@2|Bacteria,4NNV2@976|Bacteroidetes,2FT66@200643|Bacteroidia,22YJA@171551|Porphyromonadaceae	976|Bacteroidetes	S	Protein of unknown function (DUF3989)	NA	DUF3989
7.45018	0.185191	0.238722	0.775759	0.437891	0.640397	1493530	1494882	1352	+	hypothetical protein	1235803.C825_02757	2.2e-306	840	28HNW@1|root,2Z7X2@2|Bacteria,4NG2R@976|Bacteroidetes,2FMTP@200643|Bacteroidia	976|Bacteroidetes	S	Conjugative transposon TraM protein	traM	Transposon_TraM
6.92535	0.31314	0.344334	0.909409	0.363134	0.570426	1494920	1495906	986	+	hypothetical protein	880074.BARVI_12290	3.18e-236	649	COG3504@1|root,COG3504@2|Bacteria,4NH1R@976|Bacteroidetes,2FMQ5@200643|Bacteroidia,22W9G@171551|Porphyromonadaceae	976|Bacteroidetes	U	Domain of unknown function (DUF4138)	NA	DUF4138
5.8672	-0.592201	0.696942	-0.849713	0.395485	0.602353	1495909	1496484	575	+	hypothetical protein	1235803.C825_02759	1.37e-139	394	28JHB@1|root,2Z9AW@2|Bacteria,4NFVA@976|Bacteroidetes,2FPHI@200643|Bacteroidia,22YA3@171551|Porphyromonadaceae	976|Bacteroidetes	S	Conjugal transfer protein TraO	NA	TraO
6.87236	-0.465112	0.328732	-1.41487	0.157107	0.322888	1496492	1497394	902	+	DNA primase	1235803.C825_02760	7.36e-221	608	COG0358@1|root,COG0358@2|Bacteria,4NH5X@976|Bacteroidetes,2FMS3@200643|Bacteroidia,22VWV@171551|Porphyromonadaceae	976|Bacteroidetes	L	CHC2 zinc finger	NA	Toprim_2,zf-CHC2
5.52999	1.27415	1.50638	0.845833	0.397646	0.603635	1497391	1497894	503	+	hypothetical protein	1235803.C825_02761	2.98e-120	343	28M8P@1|root,2ZAMS@2|Bacteria,4NKY2@976|Bacteroidetes,2FP2C@200643|Bacteroidia,22W3D@171551|Porphyromonadaceae	976|Bacteroidetes	S	Domain of unknown function, B. Theta Gene description (DUF3872)	NA	DUF3872
5.92704	-2.62375	0.899328	-2.91745	0.00352901	0.0190119	1497891	1498421	530	+	hypothetical protein	1235803.C825_02762	1.1e-124	355	COG3772@1|root,COG3772@2|Bacteria,4NHIE@976|Bacteroidetes,2FQ7P@200643|Bacteroidia,230D9@171551|Porphyromonadaceae	976|Bacteroidetes	S	lysozyme	NA	Phage_lysozyme
7.1908	0.462089	0.339093	1.36272	0.172971	0.346423	1498488	1499525	1037	+	hypothetical protein	1235803.C825_02763	4.6e-249	683	28MBW@1|root,2ZAQ9@2|Bacteria,4NIHE@976|Bacteroidetes	976|Bacteroidetes	NA	NA	NA	NTP_transf_2
7.24714	0.979035	0.283105	3.45821	0.000543786	0.00426351	1499522	1500460	938	+	hypothetical protein	1235803.C825_02764	2.38e-223	615	COG4271@1|root,COG4271@2|Bacteria,4NKKU@976|Bacteroidetes	976|Bacteroidetes	K	Predicted nucleotide-binding protein containing TIR-like domain	NA	TIR-like
3.30763	-6.17017	3.69477	-1.66997	0.0949245	0.228041	1500473	1500733	260	+	hypothetical protein	1235803.C825_02765	9.87e-58	178	2A8GX@1|root,30XIZ@2|Bacteria,4PB0C@976|Bacteroidetes,2FY58@200643|Bacteroidia	976|Bacteroidetes	NA	NA	NA	NA
6.38689	-1.11193	1.44531	-0.769334	0.441695	0.642564	1500846	1501154	308	-	hypothetical protein	1235803.C825_02766	6.58e-68	205	28P3F@1|root,2ZBZ4@2|Bacteria,4NMPC@976|Bacteroidetes,2FSJ3@200643|Bacteroidia	976|Bacteroidetes	NA	NA	NA	NA
1.21928	-4.08219	4.00832	-1.01843	0.308474	0.512824	1501208	1501510	302	-	hypothetical protein	1235803.C825_02767	4.68e-67	203	2BFN9@1|root,329GN@2|Bacteria,4NQYN@976|Bacteroidetes,2FT6V@200643|Bacteroidia,22Y64@171551|Porphyromonadaceae	976|Bacteroidetes	NA	NA	NA	NA
1.69937	6.1603	3.82737	1.60954	0.107499	0.248206	1501701	1501964	263	-	hypothetical protein	1235803.C825_02769	3.7e-58	179	2BGWU@1|root,32AWP@2|Bacteria,4NQTX@976|Bacteroidetes,2FT3T@200643|Bacteroidia,22Y3N@171551|Porphyromonadaceae	976|Bacteroidetes	S	Psort location Cytoplasmic, score 8.96	NA	NA
7.26096	-0.553213	0.289788	-1.90903	0.0562585	0.153706	1501983	1503275	1292	-	hypothetical protein	1235803.C825_02770	4.29e-305	852	28JQ1@1|root,2Z9FZ@2|Bacteria,4NFNV@976|Bacteroidetes,2FMFK@200643|Bacteroidia,22X72@171551|Porphyromonadaceae	976|Bacteroidetes	S	PcfJ-like protein	NA	PcfJ
4.61265	-0.727372	1.44452	-0.503537	0.614587	0.770933	1503272	1503688	416	-	hypothetical protein	1235803.C825_02771	2.83e-95	277	28KU3@1|root,2ZAB1@2|Bacteria,4NHK3@976|Bacteroidetes,2FMYR@200643|Bacteroidia,22YBE@171551|Porphyromonadaceae	976|Bacteroidetes	S	PcfK-like protein	NA	PcfK
8.24219	0.80252	0.258896	3.09977	0.00193669	0.0119521	1503935	1504150	215	-	hypothetical protein	1235803.C825_02773	1.74e-31	111	2D860@1|root,32TQH@2|Bacteria,4NSAU@976|Bacteroidetes,2FTTD@200643|Bacteroidia	976|Bacteroidetes	NA	NA	NA	NA
7.47419	0.748878	0.550628	1.36004	0.173816	0.347308	1505285	1506403	1118	+	IS110 family transposase ISAzo28	1235803.C825_05534	5.16e-271	741	COG3547@1|root,COG3547@2|Bacteria,4NMIB@976|Bacteroidetes,2G37Z@200643|Bacteroidia,22Z06@171551|Porphyromonadaceae	976|Bacteroidetes	L	Transposase, IS116 IS110 IS902 family	NA	DEDD_Tnp_IS110,Transposase_20
8.08969	0.38168	0.175613	2.17341	0.0297492	0.0969611	1507178	1507735	557	+	hypothetical protein	1235803.C825_02775	1.68e-137	388	COG2885@1|root,COG2885@2|Bacteria,4NN9C@976|Bacteroidetes,2FPCM@200643|Bacteroidia,2305C@171551|Porphyromonadaceae	976|Bacteroidetes	M	Protein of unknown function (DUF3575)	NA	DUF3575
7.67835	0.122934	0.158482	0.7757	0.437926	0.640397	1507744	1509231	1487	+	hypothetical protein	1235803.C825_02776	0	954	COG2885@1|root,COG5010@1|root,COG2885@2|Bacteria,COG5010@2|Bacteria,4NJN8@976|Bacteroidetes,2FMCB@200643|Bacteroidia	976|Bacteroidetes	M	COG NOG23378 non supervised orthologous group	NA	DUF3868,OmpA
6.07201	1.48444	0.572142	2.59453	0.00947194	0.0413384	1509313	1509657	344	+	hypothetical protein	1268240.ATFI01000003_gene4993	0.000419	44.3	2B45S@1|root,31WWF@2|Bacteria,4PJZN@976|Bacteroidetes,2FTJC@200643|Bacteroidia,4ARM0@815|Bacteroidaceae	976|Bacteroidetes	NA	NA	NA	NA
6.9491	0.473421	0.305414	1.5501	0.121118	0.269221	1509784	1510419	635	-	hypothetical protein	1235803.C825_02778	1.2e-152	428	COG1564@1|root,COG1564@2|Bacteria,4NPR1@976|Bacteroidetes,2FP1N@200643|Bacteroidia,22XY5@171551|Porphyromonadaceae	976|Bacteroidetes	H	Thiamin pyrophosphokinase, catalytic domain	thiN	TPK_catalytic
7.47827	0.534129	0.20746	2.57461	0.0100354	0.0433733	1510446	1511489	1043	-	Putative nuclease YhcG	1235803.C825_02779	4.12e-253	694	COG4804@1|root,COG4804@2|Bacteria,4NE0Q@976|Bacteroidetes,2FN3T@200643|Bacteroidia,22WZQ@171551|Porphyromonadaceae	976|Bacteroidetes	S	Protein of unknown function (DUF1016)	NA	DUF1016
6.53479	0.928598	0.414649	2.23948	0.0251247	0.0855616	1511550	1512143	593	-	Riboflavin/roseoflavin transporter RibM	1235803.C825_02780	1.08e-139	394	COG3201@1|root,COG3201@2|Bacteria,4NFJI@976|Bacteroidetes,2FRYG@200643|Bacteroidia,22YI0@171551|Porphyromonadaceae	976|Bacteroidetes	H	nicotinamide mononucleotide transporter	pnuC	NMN_transporter
7.99701	-0.311681	0.176126	-1.76965	0.0767853	0.19469	1512157	1514358	2201	-	hypothetical protein	1235803.C825_02781	0	1489	COG4773@1|root,COG4773@2|Bacteria,4P1XR@976|Bacteroidetes,2G0GZ@200643|Bacteroidia,2323W@171551|Porphyromonadaceae	976|Bacteroidetes	P	TonB-dependent Receptor Plug Domain	NA	Plug,TonB_dep_Rec
8.05474	-0.10113	0.147982	-0.683394	0.494358	0.682662	1514675	1516282	1607	-	hypothetical protein	1235803.C825_02782	0	1098	2DKB3@1|root,3092N@2|Bacteria,4NJ0U@976|Bacteroidetes,2FMPA@200643|Bacteroidia	976|Bacteroidetes	S	Susd and RagB outer membrane lipoprotein	NA	SusD-like_2
8.39019	0.0107765	0.170092	0.0633567	0.949482	0.974411	1516323	1519718	3395	-	hypothetical protein	1235803.C825_02783	0	2260	COG4206@1|root,COG4206@2|Bacteria,4NZWU@976|Bacteroidetes,2G065@200643|Bacteroidia	976|Bacteroidetes	P	TonB-linked outer membrane protein, SusC RagA family	NA	CarbopepD_reg_2,Plug,TonB_dep_Rec
8.39673	1.28837	0.171188	7.52605	5.23e-14	5.00119e-12	1520707	1521180	473	+	Ribosome maturation factor RimP	1235803.C825_02784	6.85e-103	298	COG0779@1|root,COG0779@2|Bacteria,4NQ32@976|Bacteroidetes,2FSM9@200643|Bacteroidia,22Y41@171551|Porphyromonadaceae	976|Bacteroidetes	S	Required for maturation of 30S ribosomal subunits	rimP	DUF150,DUF150_C
7.42055	0.409437	0.180982	2.2623	0.0236788	0.0816483	1521190	1522455	1265	+	Transcription termination/antitermination protein NusA	1235803.C825_02785	1.76e-296	810	COG0195@1|root,COG0195@2|Bacteria,4NFGA@976|Bacteroidetes,2FNJF@200643|Bacteroidia,22WBR@171551|Porphyromonadaceae	976|Bacteroidetes	K	Participates in both transcription termination and antitermination	nusA	KH_5,NusA_N,S1
7.8927	-0.288447	0.157694	-1.82916	0.0673756	0.176515	1522477	1525518	3041	+	Translation initiation factor IF-2	1235803.C825_02786	0	1676	COG0532@1|root,COG0532@2|Bacteria,4NGP3@976|Bacteroidetes,2FM01@200643|Bacteroidia,22VWZ@171551|Porphyromonadaceae	976|Bacteroidetes	J	One of the essential components for the initiation of protein synthesis. Protects formylmethionyl-tRNA from spontaneous hydrolysis and promotes its binding to the 30S ribosomal subunits. Also involved in the hydrolysis of GTP during the formation of the 70S ribosomal complex	infB	GTP_EFTU,GTP_EFTU_D2,IF-2,IF2_N
5.95784	-1.42803	0.632172	-2.25892	0.0238881	0.0822115	1525521	1526012	491	+	hypothetical protein	1235803.C825_02787	2.99e-109	315	COG1286@1|root,COG1286@2|Bacteria,4NW4E@976|Bacteroidetes,2FUQ5@200643|Bacteroidia,22YQ3@171551|Porphyromonadaceae	976|Bacteroidetes	S	Colicin V production protein	NA	Colicin_V
7.66763	0.00326013	0.201299	0.0161955	0.987078	0.994694	1526064	1527509	1445	+	FeS cluster assembly protein SufB	1235803.C825_02788	0	962	COG0719@1|root,COG0719@2|Bacteria,4NFXH@976|Bacteroidetes,2FMUZ@200643|Bacteroidia,22WAX@171551|Porphyromonadaceae	976|Bacteroidetes	O	Cysteine desulfurase	sufB	UPF0051
7.16353	-0.229776	0.341466	-0.67291	0.501005	0.685494	1527639	1528394	755	+	putative ATP-dependent transporter SufC	1235803.C825_02789	3.02e-175	489	COG0396@1|root,COG0396@2|Bacteria,4NEMY@976|Bacteroidetes,2FMCD@200643|Bacteroidia,22WQ0@171551|Porphyromonadaceae	976|Bacteroidetes	O	Part of SUF system involved in inserting iron-sulfur clusters into proteins	sufC	ABC_tran
7.51296	0.160245	0.18917	0.847098	0.396941	0.603414	1528396	1529739	1343	+	FeS cluster assembly protein SufD	1235803.C825_02790	0	890	COG0719@1|root,COG0719@2|Bacteria,4NFPG@976|Bacteroidetes,2FNCN@200643|Bacteroidia,22VW3@171551|Porphyromonadaceae	976|Bacteroidetes	O	FeS assembly protein SufD	sufD	UPF0051
5.36965	0.908791	0.891012	1.01995	0.30775	0.51212	1529833	1530213	380	+	hypothetical protein	1235803.C825_02791	5.7e-87	255	COG0346@1|root,COG0346@2|Bacteria,4NQQA@976|Bacteroidetes,2FKZP@200643|Bacteroidia,22YGJ@171551|Porphyromonadaceae	976|Bacteroidetes	E	Glyoxalase/Bleomycin resistance protein/Dioxygenase superfamily	gloA	Acetyltransf_3,Glyoxalase,Glyoxalase_4
5.30424	-0.485528	0.892513	-0.544001	0.586441	0.750931	1530215	1530667	452	+	putative N-acetyltransferase YvbK	1235803.C825_02792	8.83e-107	307	COG0454@1|root,COG0456@2|Bacteria,4NRHS@976|Bacteroidetes,2FUVY@200643|Bacteroidia,231D7@171551|Porphyromonadaceae	976|Bacteroidetes	K	Acetyltransferase (GNAT) domain	yvbK	Acetyltransf_1,Acetyltransf_10,Acetyltransf_7
6.74817	0.691842	0.439697	1.57345	0.115614	0.2609	1530671	1531237	566	-	hypothetical protein	1235803.C825_02793	6.81e-134	379	COG1595@1|root,COG1595@2|Bacteria,4NR7M@976|Bacteroidetes,2FRPH@200643|Bacteroidia,22Y7V@171551|Porphyromonadaceae	976|Bacteroidetes	K	RNA polymerase sigma-70 factor	NA	Sigma70_r2,Sigma70_r4_2
8.23204	0.294083	0.196207	1.49884	0.133916	0.288967	1531383	1534691	3308	-	hypothetical protein	1235803.C825_02794	0	2249	COG0457@1|root,COG0457@2|Bacteria,4NKMF@976|Bacteroidetes,2FXC5@200643|Bacteroidia,231HD@171551|Porphyromonadaceae	976|Bacteroidetes	S	Domain of unknown function (DUF5107)	NA	DUF5107,TPR_8
7.69089	0.137831	0.184081	0.748755	0.454005	0.653076	1534845	1536425	1580	-	SusD-like protein	1235803.C825_02795	0	1087	COG0702@1|root,COG0702@2|Bacteria,4NJQQ@976|Bacteroidetes,2FP4E@200643|Bacteroidia	976|Bacteroidetes	GM	SusD family	NA	SusD-like_3,SusD_RagB
8.16851	0.318324	0.14565	2.18554	0.0288496	0.0949537	1536449	1539745	3296	-	TonB-dependent receptor P3	1235803.C825_02796	0	2112	COG1629@1|root,COG4771@2|Bacteria,4P1Z5@976|Bacteroidetes,2FWS8@200643|Bacteroidia	976|Bacteroidetes	P	TonB-linked outer membrane protein, SusC RagA family	NA	CarbopepD_reg_2,Plug,STN,TonB_dep_Rec
7.98375	1.01877	0.179365	5.67989	1.34778e-08	4.74827e-07	1539855	1541099	1244	-	hypothetical protein	1235803.C825_02797	6.14e-298	813	COG3712@1|root,COG3712@2|Bacteria,4NJBJ@976|Bacteroidetes,2FQUN@200643|Bacteroidia,22YHT@171551|Porphyromonadaceae	976|Bacteroidetes	PT	Domain of unknown function (DUF4974)	NA	DUF4974,FecR
7.32851	0.421187	0.242882	1.73412	0.0828962	0.207272	1541148	1541732	584	-	hypothetical protein	1235803.C825_02798	1.26e-132	376	COG1595@1|root,COG1595@2|Bacteria,4NVCP@976|Bacteroidetes,2FTBY@200643|Bacteroidia,22YK6@171551|Porphyromonadaceae	976|Bacteroidetes	K	Sigma-70, region 4	NA	Sigma70_r2,Sigma70_r4_2
7.85304	-0.158249	0.199913	-0.791588	0.428601	0.631405	1541878	1543242	1364	-	hypothetical protein	1235803.C825_02799	0	946	COG3669@1|root,COG3669@2|Bacteria,4NEDX@976|Bacteroidetes,2FNFV@200643|Bacteroidia,22WIN@171551|Porphyromonadaceae	976|Bacteroidetes	G	F5 8 type C domain protein	NA	Alpha_L_fucos,CHB_HEX_C_1,F5_F8_type_C
7.82555	-0.0186414	0.244953	-0.076102	0.939338	0.968082	1543409	1545037	1628	-	SusD-like protein P2	1235803.C825_02800	0	1134	COG0457@1|root,COG0457@2|Bacteria,4NDX0@976|Bacteroidetes,2FM6J@200643|Bacteroidia,22X1X@171551|Porphyromonadaceae	976|Bacteroidetes	S	SusD family	NA	SusD-like_3,SusD_RagB
8.20759	0.322041	0.147565	2.18237	0.0290823	0.0954263	1545075	1548458	3383	-	TonB-dependent receptor P3	1235803.C825_02801	0	2266	COG1629@1|root,COG1629@2|Bacteria,4NDXS@976|Bacteroidetes,2FM2D@200643|Bacteroidia	976|Bacteroidetes	P	TonB-linked outer membrane protein, SusC RagA family	NA	CarbopepD_reg_2,Plug,STN,TonB_dep_Rec
8.41457	0.0361973	0.173884	0.208169	0.835097	0.910932	1548677	1549345	668	-	hypothetical protein	1235803.C825_02802	1.63e-160	449	COG3712@1|root,COG3712@2|Bacteria,4NKTC@976|Bacteroidetes,2FMS6@200643|Bacteroidia,22XRQ@171551|Porphyromonadaceae	976|Bacteroidetes	PT	COG3712 Fe2 -dicitrate sensor, membrane component	NA	DUF4974,FecR
8.4349	0.52125	0.199856	2.60813	0.00910393	0.0401487	1549860	1550804	944	+	hypothetical protein	1235803.C825_02803	9.69e-224	617	COG3712@1|root,COG3712@2|Bacteria,4NKTC@976|Bacteroidetes,2FMS6@200643|Bacteroidia,22XRQ@171551|Porphyromonadaceae	976|Bacteroidetes	PT	COG3712 Fe2 -dicitrate sensor, membrane component	NA	DUF4974,FecR
8.21004	0.316235	0.172574	1.83246	0.0668826	0.175567	1550961	1554488	3527	+	TonB-dependent receptor P3	1235803.C825_02804	0	2361	COG1629@1|root,COG1629@2|Bacteria,4NDXS@976|Bacteroidetes,2FKYX@200643|Bacteroidia	976|Bacteroidetes	P	TonB-linked outer membrane protein, SusC RagA family	NA	CarbopepD_reg_2,Plug,TonB_dep_Rec
7.92314	0.0387174	0.176807	0.218982	0.826664	0.906015	1554523	1556271	1748	+	SusD-like protein P25	1235803.C825_02805	0	1191	COG0446@1|root,COG0446@2|Bacteria,4NE3A@976|Bacteroidetes,2FRH5@200643|Bacteroidia,22WU3@171551|Porphyromonadaceae	976|Bacteroidetes	S	Pfam:SusD	NA	SusD-like_3,SusD_RagB
7.64699	0.929922	0.176094	5.28084	1.28594e-07	3.54959e-06	1556351	1557481	1130	+	hypothetical protein	1235803.C825_02806	2.32e-285	778	COG4299@1|root,COG4299@2|Bacteria,4NGKU@976|Bacteroidetes,2FNH7@200643|Bacteroidia,22WI6@171551|Porphyromonadaceae	976|Bacteroidetes	S	COGs COG4299 conserved	NA	DUF5009
8.03886	0.102023	0.187267	0.544802	0.58589	0.750931	1557510	1560200	2690	+	hypothetical protein	1235803.C825_02807	0	1883	28IXK@1|root,2Z8VG@2|Bacteria,4NK45@976|Bacteroidetes,2FWV3@200643|Bacteroidia	976|Bacteroidetes	NA	NA	NA	NA
8.14572	0.648113	0.164696	3.93522	8.31203e-05	0.000957225	1560234	1561655	1421	+	hypothetical protein	1235803.C825_02808	0	959	COG0644@1|root,COG0644@2|Bacteria,4NJ0Z@976|Bacteroidetes,2FMSG@200643|Bacteroidia,22XHB@171551|Porphyromonadaceae	976|Bacteroidetes	C	FAD dependent oxidoreductase	NA	FAD_oxidored
7.89193	0.759557	0.181131	4.19342	2.74785e-05	0.000380288	1562007	1562336	329	+	hypothetical protein	1235803.C825_02809	2.91e-72	217	COG1595@1|root,COG1595@2|Bacteria	2|Bacteria	K	DNA-templated transcription, initiation	NA	Glyco_hydro_cc,Sigma70_r2,Sigma70_r4_2
4.15434	-7.01694	2.74645	-2.55492	0.0106213	0.0452125	1562349	1562582	233	+	hypothetical protein	1235803.C825_02810	1.15e-43	142	COG1595@1|root,COG1595@2|Bacteria	2|Bacteria	K	DNA-templated transcription, initiation	NA	Glyco_hydro_cc,Sigma70_r2,Sigma70_r4_2
7.47918	0.803935	0.200859	4.00248	6.26827e-05	0.00076636	1562657	1563646	989	+	hypothetical protein	1235803.C825_02811	2.25e-241	662	COG3712@1|root,COG3712@2|Bacteria,4P06Y@976|Bacteroidetes,2FTHA@200643|Bacteroidia,230EK@171551|Porphyromonadaceae	976|Bacteroidetes	PT	Domain of unknown function (DUF4974)	NA	DUF4974,FecR
8.02898	0.0900067	0.173246	0.519532	0.60339	0.7633	1563758	1567210	3452	+	TonB-dependent receptor P3	1235803.C825_02812	0	2321	COG1629@1|root,COG1629@2|Bacteria,4NDXS@976|Bacteroidetes,2FM2D@200643|Bacteroidia,22ZVT@171551|Porphyromonadaceae	976|Bacteroidetes	P	TonB dependent receptor	NA	CarbopepD_reg_2,Plug,TonB_dep_Rec
6.72334	-0.12056	0.332743	-0.362321	0.717112	0.838641	1567223	1567978	755	+	hypothetical protein	1235803.C825_02813	5.71e-189	523	COG0457@1|root,COG0457@2|Bacteria,4NG3F@976|Bacteroidetes,2FM0I@200643|Bacteroidia,22XFW@171551|Porphyromonadaceae	976|Bacteroidetes	S	SusD family	NA	SusD-like_3,SusD_RagB
7.36828	-0.522438	0.267063	-1.95623	0.0504377	0.141484	1567975	1569183	1208	+	hypothetical protein	1235803.C825_02814	9.88e-305	834	COG0457@1|root,COG0457@2|Bacteria,4NG3F@976|Bacteroidetes,2FM0I@200643|Bacteroidia,22XFW@171551|Porphyromonadaceae	976|Bacteroidetes	S	SusD family	NA	SusD-like_3,SusD_RagB
7.80147	0.0909565	0.187046	0.486279	0.626769	0.779278	1569284	1570972	1688	+	hypothetical protein	1207055.C100_19585	2.35e-07	62.4	COG1874@1|root,COG1874@2|Bacteria,1P0Y5@1224|Proteobacteria,2TUD3@28211|Alphaproteobacteria,2K31K@204457|Sphingomonadales	204457|Sphingomonadales	G	Beta-galactosidase	NA	Glyco_hydro_42
7.38552	-0.162196	0.258735	-0.62688	0.530738	0.712663	1571052	1571828	776	+	hypothetical protein	742727.HMPREF9447_04419	4.63e-15	80.5	28PZ8@1|root,2ZCIQ@2|Bacteria,4NN6Q@976|Bacteroidetes,2FPHQ@200643|Bacteroidia,4APQ0@815|Bacteroidaceae	976|Bacteroidetes	S	Domain of unknown function (DUF4469) with IG-like fold	NA	DUF4469,HU-DNA_bdg
7.93358	-0.21015	0.145635	-1.44299	0.149024	0.311241	1572070	1574736	2666	+	Beta-galactosidase	1235803.C825_02818	0	1842	COG3250@1|root,COG3250@2|Bacteria,4NHRH@976|Bacteroidetes,2FMR5@200643|Bacteroidia,22ZST@171551|Porphyromonadaceae	976|Bacteroidetes	G	Glycosyl hydrolases family 2, TIM barrel domain	lacZ_17	DUF4982,Glyco_hydro_2,Glyco_hydro_2_C,Glyco_hydro_2_N
7.55575	-0.438419	0.214369	-2.04516	0.0408389	0.122041	1574760	1576361	1601	+	hypothetical protein	1235803.C825_02819	0	1012	COG1288@1|root,COG1288@2|Bacteria,4NEUI@976|Bacteroidetes,2FQKK@200643|Bacteroidia,22WMH@171551|Porphyromonadaceae	976|Bacteroidetes	S	AbgT putative transporter family	NA	DcuC
6.9587	-0.413355	0.329971	-1.2527	0.210314	0.395864	1576386	1577174	788	+	Keratan-sulfate endo-1,4-beta-galactosidase	1235803.C825_02820	3.21e-205	565	COG2273@1|root,COG2273@2|Bacteria,4NGMJ@976|Bacteroidetes,2FQ32@200643|Bacteroidia,22XRY@171551|Porphyromonadaceae	976|Bacteroidetes	G	Glycosyl hydrolases family 16	bglA_1	Glyco_hydro_16
7.55029	-0.302061	0.239634	-1.26051	0.207487	0.392093	1577324	1578538	1214	+	Cysteine desulfurase	1235803.C825_02821	1.14e-297	811	COG0520@1|root,COG0520@2|Bacteria,4NDUB@976|Bacteroidetes,2FPF8@200643|Bacteroidia,22WTU@171551|Porphyromonadaceae	976|Bacteroidetes	E	Catalyzes the removal of elemental sulfur and selenium atoms from L-cysteine, L-cystine, L-selenocysteine, and L- selenocystine to produce L-alanine	sufS	Aminotran_5
4.76307	-0.0912303	1.74923	-0.0521546	0.958405	0.980375	1578549	1578950	401	+	hypothetical protein	1235803.C825_02822	1.37e-95	278	COG5652@1|root,COG5652@2|Bacteria,4NXUQ@976|Bacteroidetes,2FSFT@200643|Bacteroidia,22YYX@171551|Porphyromonadaceae	976|Bacteroidetes	S	VanZ like family	fjo27	VanZ
8.09824	0.714516	0.201794	3.54082	0.00039888	0.00336378	1578970	1579569	599	+	Ribonuclease HII	1235803.C825_02823	7.02e-146	410	COG0164@1|root,COG0164@2|Bacteria,4NGVR@976|Bacteroidetes,2FMS7@200643|Bacteroidia,22WJC@171551|Porphyromonadaceae	976|Bacteroidetes	L	Endonuclease that specifically degrades the RNA of RNA- DNA hybrids	rnhB	RNase_HII
8.29305	0.245877	0.176607	1.39223	0.163853	0.333497	1580248	1583550	3302	+	TonB-dependent receptor P39	1235803.C825_02824	0	2203	COG1629@1|root,COG1629@2|Bacteria,COG4771@2|Bacteria,4NDXS@976|Bacteroidetes,2FM37@200643|Bacteroidia,22WEP@171551|Porphyromonadaceae	976|Bacteroidetes	P	TonB-dependent Receptor Plug Domain	NA	CarbopepD_reg_2,Plug,TonB_dep_Rec
7.76731	-0.177973	0.165459	-1.07563	0.282092	0.483548	1583570	1585459	1889	+	hypothetical protein	1235803.C825_02825	0	1281	COG1834@1|root,COG1834@2|Bacteria,4NFQ7@976|Bacteroidetes,2FNG1@200643|Bacteroidia,23054@171551|Porphyromonadaceae	976|Bacteroidetes	E	Pfam:SusD	NA	SusD-like_3,SusD_RagB
5.85615	0.431418	1.04296	0.413649	0.679131	0.81359	1585523	1585948	425	-	Cysteine desulfuration protein SufE	1235803.C825_02826	5.23e-97	282	COG2166@1|root,COG2166@2|Bacteria,4NM9N@976|Bacteroidetes,2FSRV@200643|Bacteroidia,22XYC@171551|Porphyromonadaceae	976|Bacteroidetes	S	Fe-S metabolism	sufE	SufE
7.30243	-0.11784	0.283993	-0.414939	0.678187	0.813186	1585957	1586952	995	-	hypothetical protein	1235803.C825_02827	5.37e-250	684	COG2234@1|root,COG2234@2|Bacteria,4NG2A@976|Bacteroidetes,2FN1C@200643|Bacteroidia,22X6Y@171551|Porphyromonadaceae	976|Bacteroidetes	S	Glutamine cyclotransferase	NA	Peptidase_M28
7.78726	-0.176188	0.167653	-1.0509	0.293303	0.496565	1586977	1588755	1778	-	Carbamoyl-phosphate synthase small chain	1235803.C825_02828	0	1175	COG2071@1|root,COG2355@1|root,COG2071@2|Bacteria,COG2355@2|Bacteria,4NEBG@976|Bacteroidetes,2FMPY@200643|Bacteroidia,22X2P@171551|Porphyromonadaceae	976|Bacteroidetes	E	Membrane dipeptidase (Peptidase family M19)	NA	Peptidase_C26,Peptidase_M19
7.8463	-0.373671	0.195292	-1.9134	0.0556973	0.152562	1588851	1590806	1955	-	DNA gyrase subunit B	1235803.C825_02829	0	1271	COG0187@1|root,COG0187@2|Bacteria,4NE0P@976|Bacteroidetes,2FPG7@200643|Bacteroidia,22WA1@171551|Porphyromonadaceae	976|Bacteroidetes	L	A type II topoisomerase that negatively supercoils closed circular double-stranded (ds) DNA in an ATP-dependent manner to modulate DNA topology and maintain chromosomes in an underwound state. Negative supercoiling favors strand separation, and DNA replication, transcription, recombination and repair, all of which involve strand separation. Also able to catalyze the interconversion of other topol…	gyrB	DNA_gyraseB,DNA_gyraseB_C,HATPase_c,Toprim
1.43795	-4.30062	4.00639	-1.07344	0.283073	0.485074	1591075	1591329	254	-	30S ribosomal protein S20	1235803.C825_02831	4.28e-49	156	COG0268@1|root,COG0268@2|Bacteria,4NSB1@976|Bacteroidetes,2FTW4@200643|Bacteroidia,22YCU@171551|Porphyromonadaceae	976|Bacteroidetes	J	Binds directly to 16S ribosomal RNA	rpsT	Ribosomal_S20p
6.51239	0.438687	0.367096	1.19502	0.232079	0.423388	1591575	1591964	389	-	hypothetical protein	1235803.C825_02833	8.65e-79	235	2CH3Z@1|root,32RP9@2|Bacteria,4NQUA@976|Bacteroidetes,2FS8T@200643|Bacteroidia,22YJ2@171551|Porphyromonadaceae	976|Bacteroidetes	S	Protein of unknown function (DUF2721)	NA	DUF2721
7.2516	0.5278	0.319956	1.6496	0.0990242	0.234947	1592054	1592779	725	+	DNA repair protein RecO	1235803.C825_02834	9.81e-176	489	COG1381@1|root,COG1381@2|Bacteria,4NIBQ@976|Bacteroidetes,2FPGE@200643|Bacteroidia,22XU1@171551|Porphyromonadaceae	976|Bacteroidetes	L	Involved in DNA repair and RecF pathway recombination	recO	RecO_C,RecO_N
7.74384	1.1917	0.190263	6.26343	3.76606e-10	1.88479e-08	1592938	1593786	848	-	hypothetical protein	1235803.C825_02836	6.66e-199	551	COG3617@1|root,COG3617@2|Bacteria,4NIG0@976|Bacteroidetes,2G3ES@200643|Bacteroidia,22XHD@171551|Porphyromonadaceae	976|Bacteroidetes	K	BRO family, N-terminal domain	NA	Bro-N
7.82449	-0.0281935	0.220096	-0.128096	0.898073	0.947062	1593969	1596113	2144	-	hypothetical protein	1235803.C825_02837	0	1384	28KDF@1|root,2Z9ZY@2|Bacteria,4NKFB@976|Bacteroidetes,2FQSI@200643|Bacteroidia,231U4@171551|Porphyromonadaceae	976|Bacteroidetes	NA	NA	NA	Fimbrillin_C,P_gingi_FimA
7.71895	-0.296923	0.152557	-1.9463	0.0516182	0.143982	1596126	1598120	1994	-	Major fimbrium tip subunit FimD	1235803.C825_02838	0	1306	2DB8M@1|root,2Z7S7@2|Bacteria,4NI89@976|Bacteroidetes,2FQJB@200643|Bacteroidia,22XET@171551|Porphyromonadaceae	976|Bacteroidetes	NA	NA	NA	P_gingi_FimA
7.59918	-0.271112	0.195979	-1.38337	0.166551	0.336813	1598136	1599581	1445	-	hypothetical protein	1235803.C825_02839	0	944	28MIY@1|root,2ZAVK@2|Bacteria,4NK30@976|Bacteroidetes,2FQT3@200643|Bacteroidia,22Z1F@171551|Porphyromonadaceae	976|Bacteroidetes	NA	NA	NA	DUF4906,P_gingi_FimA
6.77877	-0.407444	0.34926	-1.16659	0.243376	0.437472	1599595	1600446	851	-	hypothetical protein	1235803.C825_02840	1.92e-203	563	28MPF@1|root,2ZAYR@2|Bacteria,4NM04@976|Bacteroidetes,2FQTZ@200643|Bacteroidia,22YMD@171551|Porphyromonadaceae	976|Bacteroidetes	S	Fimbrillin-A associated anchor proteins Mfa1 and Mfa2	NA	Mfa2
7.81455	0.111164	0.435681	0.25515	0.798607	0.892061	1600510	1601721	1211	-	hypothetical protein	1235803.C825_02841	3.63e-289	790	28N72@1|root,2ZBBU@2|Bacteria,4NJ2H@976|Bacteroidetes,2FQA4@200643|Bacteroidia,231QP@171551|Porphyromonadaceae	976|Bacteroidetes	NA	NA	NA	NA
7.85047	0.471421	0.240769	1.95798	0.050232	0.141203	1601879	1602430	551	-	hypothetical protein	1235803.C825_02842	2.13e-139	392	COG2885@1|root,COG2885@2|Bacteria,4NN9C@976|Bacteroidetes,2FPCM@200643|Bacteroidia,22XYT@171551|Porphyromonadaceae	976|Bacteroidetes	M	Protein of unknown function (DUF3575)	NA	DUF3575
7.15786	-0.0159866	0.415612	-0.0384652	0.969317	0.985512	1602657	1603064	407	-	hypothetical protein	1235803.C825_02843	2.16e-102	295	2C6X9@1|root,34AQQ@2|Bacteria,4P6US@976|Bacteroidetes,2G1S8@200643|Bacteroidia,2316B@171551|Porphyromonadaceae	976|Bacteroidetes	NA	NA	NA	NA
7.47001	-0.264279	0.23349	-1.13187	0.257691	0.453777	1604961	1605908	947	-	hypothetical protein	1235803.C825_02846	1.19e-229	632	291SX@1|root,2ZPCV@2|Bacteria,4P7IG@976|Bacteroidetes,2FZBN@200643|Bacteroidia	976|Bacteroidetes	S	Fimbrillin-A associated anchor proteins Mfa1 and Mfa2	NA	Mfa2
7.61981	-0.89339	0.258392	-3.4575	0.000545212	0.00426843	1606061	1607053	992	+	hypothetical protein	1235803.C825_02847	1.96e-256	701	COG1082@1|root,COG1082@2|Bacteria,4NGBE@976|Bacteroidetes,2FNN2@200643|Bacteroidia,22ZAK@171551|Porphyromonadaceae	976|Bacteroidetes	G	AP endonuclease family 2 C terminus	NA	AP_endonuc_2,AP_endonuc_2_N
7.36585	-0.520447	0.385282	-1.35082	0.176753	0.35082	1607264	1607704	440	-	hypothetical protein	1235803.C825_02848	8.9e-96	279	COG0776@1|root,COG0776@2|Bacteria,4NUQD@976|Bacteroidetes,2FS5I@200643|Bacteroidia	976|Bacteroidetes	L	DNA-binding protein	NA	Bac_DNA_binding,HU-DNA_bdg
5.16448	1.64136	1.85659	0.884069	0.376659	0.583119	1607917	1608153	236	+	hypothetical protein	1122931.AUAE01000005_gene3393	2.38e-13	65.9	28ZY9@1|root,2ZMNR@2|Bacteria,4P7N8@976|Bacteroidetes,2FVZY@200643|Bacteroidia	976|Bacteroidetes	S	Domain of unknown function (DUF4248)	NA	DUF4248
7.67811	-0.370852	0.184406	-2.01106	0.0443191	0.128983	1608180	1610090	1910	+	hypothetical protein	1235803.C825_02850	0	1256	COG0358@1|root,COG5545@1|root,COG0358@2|Bacteria,COG5545@2|Bacteria,4NETK@976|Bacteroidetes,2FR42@200643|Bacteroidia	976|Bacteroidetes	L	Protein of unknown function (DUF3987)	NA	DUF3987,PriCT_2,VirE_N
7.90991	-0.127846	0.258136	-0.495266	0.620413	0.775335	1610212	1610544	332	+	hypothetical protein	1122931.AUAE01000005_gene3317	2.96e-37	140	COG0358@1|root,COG5545@1|root,COG0358@2|Bacteria,COG5545@2|Bacteria,4NETK@976|Bacteroidetes,2FR42@200643|Bacteroidia	976|Bacteroidetes	L	Protein of unknown function (DUF3987)	NA	DUF3987,PriCT_2,VirE_N
8.34603	0.284355	0.176993	1.60659	0.108144	0.249081	1611053	1614268	3215	+	hypothetical protein	411477.PARMER_03272	9.51e-28	130	2DUTV@1|root,33S7W@2|Bacteria,4P1VI@976|Bacteroidetes,2FWJJ@200643|Bacteroidia,22ZT0@171551|Porphyromonadaceae	976|Bacteroidetes	NA	NA	NA	NA
7.38012	-0.938189	0.266621	-3.51881	0.000433489	0.00355488	1614544	1615440	896	+	Meso-diaminopimelate D-dehydrogenase	1235803.C825_02853	1.03e-210	582	COG0673@1|root,COG0673@2|Bacteria,4NGP9@976|Bacteroidetes,2FMTZ@200643|Bacteroidia,22WG9@171551|Porphyromonadaceae	976|Bacteroidetes	E	Catalyzes the reversible NADPH-dependent reductive amination of L-2-amino-6-oxopimelate, the acyclic form of L- tetrahydrodipicolinate, to generate the meso compound, D,L-2,6- diaminopimelate	ddh	CoA_binding,DAPDH_C,GFO_IDH_MocA,Semialdhyde_dh
6.65995	-0.50911	0.318047	-1.60074	0.109435	0.250973	1615451	1616299	848	+	Phosphatidylglycerol--prolipoprotein diacylglyceryl transferase	1235803.C825_02854	1.81e-221	608	COG0682@1|root,COG0682@2|Bacteria,4NFP7@976|Bacteroidetes,2FMXU@200643|Bacteroidia,22WIT@171551|Porphyromonadaceae	976|Bacteroidetes	M	Transfers the N-acyl diglyceride group on what will become the N-terminal cysteine of membrane lipoproteins	lgt	LGT
7.34875	-0.393481	0.251589	-1.56399	0.117821	0.264209	1616310	1617506	1196	+	Nitric oxide reductase	1235803.C825_02855	4.12e-297	809	COG0426@1|root,COG0426@2|Bacteria,4NGI2@976|Bacteroidetes,2FMWU@200643|Bacteroidia,22W6S@171551|Porphyromonadaceae	976|Bacteroidetes	C	Metallo-beta-lactamase domain protein	fprA	Flavodoxin_1,Flavodoxin_5,Lactamase_B,Lactamase_B_2
7.58256	-0.591314	0.286405	-2.06461	0.0389601	0.118339	1617653	1618465	812	+	Glucosamine-6-phosphate deaminase	1235803.C825_02856	2.94e-196	543	COG0363@1|root,COG0363@2|Bacteria,4NHF8@976|Bacteroidetes,2FN1D@200643|Bacteroidia,22W1C@171551|Porphyromonadaceae	976|Bacteroidetes	G	Catalyzes the reversible isomerization-deamination of glucosamine 6-phosphate (GlcN6P) to form fructose 6-phosphate (Fru6P) and ammonium ion	nagB	Glucosamine_iso
8.10097	0.630561	0.183694	3.43266	0.000597683	0.00459855	1618645	1620249	1604	+	hypothetical protein	1235803.C825_02857	0	1068	28MEY@1|root,2ZASH@2|Bacteria,4NG12@976|Bacteroidetes,2FN3C@200643|Bacteroidia,230T8@171551|Porphyromonadaceae	976|Bacteroidetes	S	PQQ-like domain	NA	PQQ_2
7.4999	0.694455	0.287304	2.41715	0.0156427	0.060091	1620388	1620993	605	+	hypothetical protein	1235803.C825_02858	3.45e-138	391	COG3637@1|root,COG3637@2|Bacteria,4NR9K@976|Bacteroidetes,2FU82@200643|Bacteroidia,231DZ@171551|Porphyromonadaceae	976|Bacteroidetes	M	Outer membrane protein beta-barrel domain	NA	OMP_b-brl,OMP_b-brl_2
7.54366	-0.00628284	0.268932	-0.0233621	0.981361	0.990595	1621089	1622132	1043	+	hypothetical protein	1235803.C825_02859	1.78e-272	743	COG3669@1|root,COG3669@2|Bacteria,4NEDX@976|Bacteroidetes,2FNFV@200643|Bacteroidia,22ZVK@171551|Porphyromonadaceae	976|Bacteroidetes	G	Alpha-L-fucosidase	NA	Alpha_L_fucos,F5_F8_type_C
[truncated: 4,202 more rows]

## Sheet: deseq_res
log2MeanGeTMM	log2FoldChange	lfcSE	stat	pvalue	padj	start	end	gene_length	strand	product	seed_ortholog	evalue	score	eggNOG_OGs	max_annot_lvl	COG_category	Description	Preferred_name	PFAMs
[truncated: 4,437 more rows]

[truncated: 7 more sheets: limma_res, DA_GOG_PFAM_relative_gene_ratio, Operon_mapping, mapping_statistics, reads_qc_metric, assembly polishing result, de-novo_quast]
